# Supplementary material for: Chemical Tools for Profiling the Intracellular ADP-ribosylated Proteome
Source: bioRxiv preprint, doi:10.1101/2023.08.30.555609, version 1 (2023-09-01)
Supplement: Extended Data S1 [file 555609_file03.xlsx]

## Sheet: Fig. 4A data
Identified proteins in profile plot Fig. 4A (6Yn-Pro vs DMSO control)
Gene names	Protein names	DMSO (Log2 intensity)	6Yn-Pro (Log2 intensity)	Peptides	Razor + unique peptides	Unique peptides	Sequence coverage [%]	Unique + razor sequence coverage [%]	Unique sequence coverage [%]	Mol. weight [kDa]	Q-value	Score	Intensity	MS/MS count	Protein IDs	Majority protein IDs
EIF3C;EIF3CL	Eukaryotic translation initiation factor 3 subunit C;Eukaryotic translation initiation factor 3 subunit C-like protein	-2.64191	-1.96858	1	1	1	1.5	1.5	1.5	105.34	0	5.8671	2076600	1	Q99613;B5ME19	Q99613;B5ME19
PRRT4	Proline-rich transmembrane protein 4	-2.70617	-0.442575	1	1	1	3.9	3.9	3.9	92.711	0.0089021	5.7314	101320000	1	C9JH25	C9JH25
DDX39A;DDX39B	ATP-dependent RNA helicase DDX39A;Spliceosome RNA helicase DDX39B	-1.18262	-1.80255	1	1	1	1.6	1.6	1.6	49.129	0	8.7045	9273300	1	O00148;Q13838	O00148;Q13838
ARVCF	Armadillo repeat protein deleted in velo-cardio-facial syndrome	0.478921	1.43848	1	1	1	0.7	0.7	0.7	104.64	0.0031746	5.833	23886000	2	O00192	O00192
PSMD11	26S proteasome non-ATPase regulatory subunit 11	-2.17991	-2.15431	1	1	1	2.4	2.4	2.4	47.463	0	6.1696	1995400	1	O00231	O00231
CLIC1	Chloride intracellular channel protein 1	-1.04742	-1.32059	2	2	2	14.1	14.1	14.1	26.922	0	16.269	4568100	3	O00299	O00299
IRS4	Insulin receptor substrate 4	0.806318	-1.56288	1	1	1	0.7	0.7	0.7	133.77	0.0088757	5.7313	3140900	1	O14654	O14654
PSMA7;PSMA8	Proteasome subunit alpha type-7;Proteasome subunit alpha type-7-like	0.257531	-0.533506	2	2	2	11.7	11.7	11.7	27.887	0	18.52	32764000	4	O14818;Q8TAA3	O14818;Q8TAA3
HNRNPDL;SHROOM4	Heterogeneous nuclear ribonucleoprotein D-like;Protein Shroom4	1.71278	1.89358	2	2	2	3.6	3.6	3.6	46.437	0	76.052	9052400	2	O14979;Q9ULL8;REV__Q8N0S2;REV__Q9ULL8	O14979;Q9ULL8;REV__Q8N0S2;REV__Q9ULL8
SPTBN2	Spectrin beta chain, non-erythrocytic 2	1.90707	3.47388	1	1	1	0.3	0.3	0.3	271.32	0	6.7265	195490000	2	O15020	O15020
EIF3H	Eukaryotic translation initiation factor 3 subunit H	-1.38338	-2.36048	1	1	1	5.4	5.4	5.4	39.93	0	6.2167	3026200	1	O15372	O15372
PHGDH	D-3-phosphoglycerate dehydrogenase	0	0.547796	2	2	2	3.9	3.9	3.9	56.65	0	11.472	13786000	3	O43175	O43175
NME2;NME1;NME2P1	Nucleoside diphosphate kinase B;Nucleoside diphosphate kinase A;Putative nucleoside diphosphate kinase	1.35825	0.85737	1	1	1	5.9	5.9	5.9	17.298	0	6.3727	24994000	3	P22392;P15531;O60361	P22392;P15531;O60361
HIST2H2BF;HIST1H2BM;HIST1H2BH;HIST1H2BD;HIST1H2BK;HIST1H2BN;HIST1H2BC;H2BFS;HIST1H2BJ;HIST1H2BB;HIST1H2BL;HIST1H2BO;HIST2H2BE;HIST1H2BA	Histone H2B type 2-F;Histone H2B type 1-M;Histone H2B type 1-H;Histone H2B type 1-D;Histone H2B type 1-K;Histone H2B type 1-N;Histone H2B type 1-C/E/F/G/I;Histone H2B type F-S;Histone H2B type 1-J;Histone H2B type 1-B;Histone H2B type 1-L;Histone H2B type 1-O;Histone H2B type 2-E;Histone H2B type 1-A	4.23149	5.25491	5	5	5	33.3	33.3	33.3	13.92	0	87.986	244600000	8	Q5QNW6;Q99879;Q93079;P58876;O60814;Q99877;P62807;P57053;P06899;P33778;Q99880;P23527;Q16778;Q96A08;Q8N257;Q6DN03;Q6DRA6;A0A2R8Y619	Q5QNW6;Q99879;Q93079;P58876;O60814;Q99877;P62807;P57053;P06899;P33778;Q99880;P23527;Q16778;Q96A08
KIF21B	Kinesin-like protein KIF21B	-1.40336	-0.110555	1	1	1	1.6	1.6	1.6	182.66	0.0085227	5.6785	260370000	1	O75037	O75037
TBCA	Tubulin-specific chaperone A	-0.428964	-1.70157	1	1	1	9.3	9.3	9.3	12.855	0.0031447	5.8008	3937700	1	O75347	O75347
CS	Citrate synthase, mitochondrial	-0.176434	-0.693574	2	2	2	3.9	3.9	3.9	51.712	0	37.356	39016000	9	O75390	O75390
CBR1;CBR3	Carbonyl reductase [NADPH] 1;Carbonyl reductase [NADPH] 3	-2.69623	-2.45584	1	1	1	5.8	5.8	5.8	30.375	0	12.548	8709500	2	P16152;O75828	P16152;O75828
RSL1D1	Ribosomal L1 domain-containing protein 1	0.0312128	-0.669676	1	1	1	1.6	1.6	1.6	54.972	0.0085714	5.6887	8616600	1	O76021	O76021
UBR5	E3 ubiquitin-protein ligase UBR5	-1.51185	0.210907	1	1	1	1.2	1.2	1.2	309.35	0.0086957	5.7046	59445000	1	O95071	O95071
NDUFB4	NADH dehydrogenase [ubiquinone] 1 beta subcomplex subunit 4	-3.10933	-2.61225	1	1	1	14	14	14	15.208	0	19.854	4581500	1	O95168	O95168
LDHA	L-lactate dehydrogenase A chain	1.52632	1.03157	3	2	2	9.6	6	6	36.688	0	15.786	14857000	4	P00338;P07864;Q6ZMR3	P00338
GSR	Glutathione reductase, mitochondrial	-1.68563	-1.95897	1	1	1	1.5	1.5	1.5	56.256	0.0081967	5.65	663170	1	P00390	P00390
PGK1	Phosphoglycerate kinase 1	2.46046	2.91156	4	4	4	12.2	12.2	12.2	44.614	0	52.717	69579000	6	P00558;P07205	P00558
PLAU	Urokinase-type plasminogen activator;Urokinase-type plasminogen activator long chain A;Urokinase-type plasminogen activator short chain A;Urokinase-type plasminogen activator chain B	8.29836	9.14015	1	1	1	2.3	2.3	2.3	48.507	0	7.3155	8776300000	12	P00749	P00749
APOC3	Apolipoprotein C-III	-1.02177	0.387842	1	1	1	16.2	16.2	16.2	10.852	0	90.9	27920000	2	P02656	P02656
ALDOA	Fructose-bisphosphate aldolase A	3.45296	3.20353	10	10	9	36.3	36.3	28.6	39.42	0	186.2	244370000	19	P04075	P04075
KRT6B	Keratin, type II cytoskeletal 6B	1.23171	3.57528	7	3	1	12.2	5.3	1.6	60.066	0	201.18	64246000	6	P04259	P04259
GAPDH	Glyceraldehyde-3-phosphate dehydrogenase	5.65505	3.93496	5	5	5	17.6	17.6	17.6	36.053	0	41.209	210530000	11	P04406	P04406
ATP1A1;ATP1A3;ATP1A2	Sodium/potassium-transporting ATPase subunit alpha-1;Sodium/potassium-transporting ATPase subunit alpha-3;Sodium/potassium-transporting ATPase subunit alpha-2	-0.17992	-0.50941	2	2	2	2.6	2.6	2.6	112.89	0	26.174	12402000	5	P05023;P13637;P50993	P05023;P13637;P50993
SLC25A5	ADP/ATP translocase 2;ADP/ATP translocase 2, N-terminally processed	4.00336	3.78884	3	3	1	8.4	8.4	3	32.852	0	19.087	73057000	4	P05141;P12235;Q9H0C2	P05141
RPLP0;RPLP0P6	60S acidic ribosomal protein P0;60S acidic ribosomal protein P0-like	-1.58017	-2.4552	1	1	1	6.9	6.9	6.9	34.273	0	6.8135	4260100	1	P05388;Q8NHW5	P05388;Q8NHW5
ATP5G1;ATP5G3;ATP5G2	ATP synthase F(0) complex subunit C1, mitochondrial;ATP synthase F(0) complex subunit C3, mitochondrial;ATP synthase F(0) complex subunit C2, mitochondrial	2.68223	-1.76499	1	1	1	5.1	5.1	5.1	14.277	0	12.929	13975000	1	P05496;P48201;Q06055	P05496;P48201;Q06055
GPI	Glucose-6-phosphate isomerase	1.20092	-0.185035	3	3	2	4.5	4.5	2.5	63.146	0	146.7	5941300	2	P06744;CON__Q3ZBD7	P06744
NPM1	Nucleophosmin	4.00839	2.82268	4	4	4	18	18	18	32.575	0	26.923	70488000	5	P06748	P06748
LDHB	L-lactate dehydrogenase B chain	3.46834	2.85079	3	3	2	11.7	11.7	8.1	36.638	0	323.31	110150000	9	P07195	P07195
P4HB	Protein disulfide-isomerase	-0.0993271	-0.75808	2	2	2	3.7	3.7	3.7	57.116	0	15.106	4949500	3	P07237	P07237
ANXA2;ANXA2P2	Annexin A2;Putative annexin A2-like protein	-3.09733	-2.56356	2	2	2	8	8	8	38.604	0	19.006	3832600	2	P07355;A6NMY6	P07355;A6NMY6
TUBB;TUBB2B;TUBB2A;TUBB3	Tubulin beta chain;Tubulin beta-2B chain;Tubulin beta-2A chain;Tubulin beta-3 chain	2.17291	1.24201	4	4	2	12.8	12.8	6.1	49.67	0	323.31	87998000	14	P07437;Q9BVA1;Q13885;Q13509	P07437;Q9BVA1;Q13885;Q13509
APRT	Adenine phosphoribosyltransferase	-2.91938	-1.43344	1	1	1	6.1	6.1	6.1	19.608	0	79.103	6637200	3	P07741	P07741
HSP90AA1	Heat shock protein HSP 90-alpha	2.79263	1.54716	8	4	4	16.4	9.6	9.6	84.659	0	82.482	41397000	9	P07900;Q14568	P07900
HNRNPC	Heterogeneous nuclear ribonucleoproteins C1/C2	1.14727	-1.47097	4	4	3	11.8	11.8	8.2	33.67	0	61.767	8770800	3	P07910;O60812;B7ZW38;B2RXH8;P0DMR1;A0A0G2JPF8;A0A0G2JNQ3	P07910
HSP90AB1	Heat shock protein HSP 90-beta	5.37308	4.02277	15	15	10	28.5	28.5	19.6	83.263	0	323.31	268920000	50	P08238;Q58FF7;Q58FF8	P08238
VIM	Vimentin	3.39029	3.48653	12	12	12	27.9	27.9	27.9	53.651	0	133.93	90057000	19	P08670;P12036;P07197;P17661;P07196;Q16352	P08670
ANXA5	Annexin A5	-0.738591	-1.06559	3	3	3	17.2	17.2	17.2	35.936	0	48.392	12040000	5	P08758	P08758
HNRNPA1;HNRNPA1L2	Heterogeneous nuclear ribonucleoprotein A1;Heterogeneous nuclear ribonucleoprotein A1, N-terminally processed;Heterogeneous nuclear ribonucleoprotein A1-like 2	3.72808	3.0071	3	3	2	10.2	10.2	8.3	38.746	0	105.63	134720000	10	P09651;Q32P51;A0A2R8Y4L2	P09651;Q32P51
PARP1	Poly [ADP-ribose] polymerase 1	0.449205	1.33227	3	3	3	4.7	4.7	4.7	113.08	0	28.914	10783000	4	P09874	P09874
UBC;UBB;RPS27A;UBA52	Polyubiquitin-C;Ubiquitin;Polyubiquitin-B;Ubiquitin;Ubiquitin-40S ribosomal protein S27a;Ubiquitin;40S ribosomal protein S27a;Ubiquitin-60S ribosomal protein L40;Ubiquitin;60S ribosomal protein L40	3.09463	2.64303	2	2	1	32.8	32.8	21	77.038	0	24.408	46614000	6	P0CG48;P0CG47;P62979;P62987	P0CG48;P0CG47;P62979;P62987
HSPA1A;HSPA1B;HSPA1L	Heat shock 70 kDa protein 1A;Heat shock 70 kDa protein 1B;Heat shock 70 kDa protein 1-like	4.62364	3.41322	10	8	4	19.5	16.4	9.7	70.051	0	196.87	450640000	19	P0DMV8;P0DMV9;P34931	P0DMV8;P0DMV9;P34931
HIST1H1E	Histone H1.4	3.36848	4.35463	5	2	2	21.5	9.1	9.1	21.865	0	31.863	113780000	3	P10412	P10412
HSPD1	60 kDa heat shock protein, mitochondrial	2.17921	2.17185	3	3	3	8.9	8.9	8.9	61.054	0	119.39	143000000	17	P10809	P10809
HSPA5	78 kDa glucose-regulated protein	0.965902	1.78654	5	4	4	9.6	8.6	8.6	72.332	0	135.95	84784000	11	P11021	P11021
HSPA8	Heat shock cognate 71 kDa protein	5.36269	3.81283	12	12	10	21.5	21.5	18.4	70.897	0	323.31	242960000	23	P11142;P54652	P11142
MTHFD1	C-1-tetrahydrofolate synthase, cytoplasmic;Methylenetetrahydrofolate dehydrogenase;Methenyltetrahydrofolate cyclohydrolase;Formyltetrahydrofolate synthetase;C-1-tetrahydrofolate synthase, cytoplasmic, N-terminally processed	-1.50463	-1.48244	1	1	1	1.2	1.2	1.2	101.56	0	5.8463	3378400	1	P11586	P11586
ADH5	Alcohol dehydrogenase class-3	-1.50685	-0.940211	1	1	1	2.1	2.1	2.1	39.724	0.0082418	5.6559	1216200	1	P11766	P11766
PABPC1;PABPC4;PABPC3	Polyadenylate-binding protein 1;Polyadenylate-binding protein 4;Polyadenylate-binding protein 3	-1.28316	-0.714111	2	2	2	4.4	4.4	4.4	70.67	0	19.021	12357000	3	P11940;Q13310;Q9H361	P11940;Q13310;Q9H361
PCNA	Proliferating cell nuclear antigen	0.373161	-0.605587	2	2	2	12.3	12.3	12.3	28.768	0	23.836	12595000	3	P12004	P12004
IMPDH2	Inosine-5-monophosphate dehydrogenase 2	-2.91858	-0.986655	1	1	1	2.1	2.1	2.1	55.804	0	7.0609	1715600	1	P12268	P12268
CKB	Creatine kinase B-type	3.42473	2.95195	6	6	6	21.3	21.3	21.3	42.644	0	323.31	448230000	23	P12277	P12277
CKMT1A	Creatine kinase U-type, mitochondrial	-3.0157	-2.22483	1	1	1	5	5	5	47.036	0	6.7463	7916800	1	P12532	P12532
XRCC6	X-ray repair cross-complementing protein 6	-2.52377	-2.71097	1	1	1	2.3	2.3	2.3	69.842	0	6.8328	4938500	2	P12956	P12956
EEF2	Elongation factor 2	4.1663	2.96277	7	7	7	10.8	10.8	10.8	95.337	0	89.349	103690000	15	P13639	P13639
MIF	Macrophage migration inhibitory factor	2.45556	3.74792	1	1	1	6.1	6.1	6.1	12.476	0	6.1742	208270000	1	P14174	P14174
PKM	Pyruvate kinase PKM	5.061	4.17866	10	10	10	24.3	24.3	24.3	57.936	0	140.97	372670000	23	P14618;P30613	P14618
HSP90B1	Endoplasmin	-0.566304	0.0663271	2	1	1	3.5	1.7	1.7	92.468	0	13.447	8588400	4	P14625	P14625
HNRNPL	Heterogeneous nuclear ribonucleoprotein L	1.62636	0.902084	1	1	1	1.7	1.7	1.7	64.132	0	6.7984	13371000	2	P14866	P14866
JUP	Junction plakoglobin	-2.73279	-3.26222	1	1	1	1.6	1.6	1.6	81.744	0	6.1282	1232500	1	P14923	P14923
RAC1;RAC2;RAC3	Ras-related C3 botulinum toxin substrate 1;Ras-related C3 botulinum toxin substrate 2;Ras-related C3 botulinum toxin substrate 3	-0.557094	-1.30424	1	1	1	4.2	4.2	4.2	21.45	0	8.6166	4178900	1	P63000;P15153;P60763	P63000;P15153;P60763
RPS2	40S ribosomal protein S2	2.81203	1.28397	3	3	3	9.9	9.9	9.9	31.324	0	21.842	34603000	4	P15880	P15880
DSP	Desmoplakin	-0.21634	0.867909	3	3	3	1	1	1	331.77	0	84.764	12146000	4	P15924	P15924
HIST1H1D	Histone H1.3	0.611856	0.913069	5	2	2	21.3	9	9	22.35	0	40.018	17374000	2	P16402;Q02539;P22492	P16402
HIST1H1C	Histone H1.2	5.94005	6.4986	5	5	2	25.8	25.8	13.1	21.364	0	251.23	533650000	24	P16403	P16403
HSPA6;HSPA7	Heat shock 70 kDa protein 6;Putative heat shock 70 kDa protein 7	3.08615	1.98024	6	1	1	10.4	1.7	1.7	71.027	0	140.63	126580000	8	P17066;P48741	P17066;P48741
DDX5	Probable ATP-dependent RNA helicase DDX5	-1.28782	-1.93376	2	2	2	4.6	4.6	4.6	69.147	0	13.763	6120200	2	P17844	P17844
PFKP;PFKL	ATP-dependent 6-phosphofructokinase, platelet type;ATP-dependent 6-phosphofructokinase, liver type	-4.23696	-1.6111	1	1	1	2.4	2.4	2.4	85.595	0	27.027	11544000	1	Q01813;P17858	Q01813;P17858
TCP1	T-complex protein 1 subunit alpha	2.11889	1.96267	6	6	6	11.9	11.9	11.9	60.343	0	53.711	25448000	11	P17987	P17987
RPL35A	60S ribosomal protein L35a	1.69783	-0.0923901	2	2	2	12.7	12.7	12.7	12.538	0	12.134	28845000	2	P18077	P18077
RPL7	60S ribosomal protein L7	0.507215	-0.995477	3	3	3	12.5	12.5	12.5	29.225	0	22.001	11703000	5	P18124	P18124
VCL	Vinculin	-1.92726	-1.61825	1	1	1	0.7	0.7	0.7	123.8	0	6.3865	2475000	1	P18206	P18206
RPL17	60S ribosomal protein L17	1.22692	0.646648	1	1	1	3.8	3.8	3.8	21.397	0	5.9127	11644000	1	P18621	P18621
NCL	Nucleolin	1.94211	0.508731	2	2	2	3.5	3.5	3.5	76.613	0	19.291	22729000	2	P19338	P19338
LMNB1	Lamin-B1	-1.35886	-0.791336	1	1	1	2	2	2	66.408	0	9.0639	6820700	2	P20700	P20700
FLNA	Filamin-A	1.46138	0.275903	8	8	8	5.7	5.7	5.7	280.74	0	111.31	58789000	17	P21333	P21333
VDAC1	Voltage-dependent anion-selective channel protein 1	-1.60475	-1.82663	1	1	1	3.9	3.9	3.9	30.772	0	8.8666	3255200	2	P21796	P21796
PAICS	Multifunctional protein ADE2;Phosphoribosylaminoimidazole-succinocarboxamide synthase;Phosphoribosylaminoimidazole carboxylase	-0.257802	-0.521047	2	2	2	5.4	5.4	5.4	47.079	0	12.876	5019600	2	P22234	P22234
UBA1	Ubiquitin-like modifier-activating enzyme 1	0.673237	0.0481844	4	4	4	5.4	5.4	5.4	117.85	0	34.086	17185000	6	P22314	P22314
HNRNPA2B1	Heterogeneous nuclear ribonucleoproteins A2/B1	3.93177	2.77472	10	10	10	39.1	39.1	39.1	37.429	0	164.16	200890000	15	P22626	P22626
SFPQ	Splicing factor, proline- and glutamine-rich	1.52997	0.579096	2	2	1	2.1	2.1	1	76.149	0	22.664	18391000	4	P23246	P23246
RPS3	40S ribosomal protein S3	2.30166	1.3172	2	2	2	8.6	8.6	8.6	26.688	0	38.106	16308000	4	P23396	P23396
AHCY	Adenosylhomocysteinase	1.59945	0.83242	2	2	2	6.5	6.5	6.5	47.716	0	29.877	20377000	5	P23526	P23526
CFL1;CFL2	Cofilin-1;Cofilin-2	2.18411	0.995097	2	2	2	13.9	13.9	13.9	18.502	0	17.872	20718000	6	P23528;Q9Y281	P23528;Q9Y281
MCM3	DNA replication licensing factor MCM3	-3.03939	-1.04519	1	1	1	1.5	1.5	1.5	90.98	0	9.968	3292400	1	P25205	P25205
ATP5A1	ATP synthase subunit alpha, mitochondrial	2.61964	1.56514	4	4	4	8.3	8.3	8.3	59.75	0	41.684	52337000	7	P25705	P25705
RPL13	60S ribosomal protein L13	2.61061	2.25393	2	2	2	8.1	8.1	8.1	24.261	0	18.57	38815000	6	P26373	P26373
PTBP1	Polypyrimidine tract-binding protein 1	2.29865	2.28799	5	5	4	7.2	7.2	7	57.221	0	37.223	22842000	5	P26599	P26599
EEF1G	Elongation factor 1-gamma	0.675755	0.0914297	2	2	2	6.2	6.2	6.2	50.118	0	204.08	48365000	4	P26641	P26641
YWHAQ	14-3-3 protein theta	-3.38519	-2.71475	1	1	1	9.4	9.4	9.4	27.764	0	10.204	7614600	3	P27348	P27348
CALR	Calreticulin	0.244685	0.412844	1	1	1	2.2	2.2	2.2	48.141	0.0062112	5.7895	11142000	1	P27797	P27797
PSMA5	Proteasome subunit alpha type-5	-0.733654	0.147014	2	2	2	12	12	12	26.411	0	28.231	9084400	2	P28066	P28066
PSMB5	Proteasome subunit beta type-5	0.405793	-1.57399	3	3	3	16	16	16	28.48	0	38.802	17833000	8	P28074	P28074
TKT	Transketolase	0.752514	0.255285	3	3	3	7.9	7.9	7.9	67.877	0	32.746	39607000	5	P29401	P29401
RPL12	60S ribosomal protein L12	0.979813	-1.1598	4	4	4	32.1	32.1	32.1	17.818	0	33.574	18443000	5	P30050	P30050
PEBP1	Phosphatidylethanolamine-binding protein 1;Hippocampal cholinergic neurostimulating peptide	0.940033	0.54533	2	2	2	15	15	15	21.057	0	19.484	8230900	3	P30086	P30086
PDIA3	Protein disulfide-isomerase A3	-0.317887	-0.290953	1	1	1	2.2	2.2	2.2	56.782	0	9.4052	5033000	1	P30101	P30101
HNRNPH1	Heterogeneous nuclear ribonucleoprotein H;Heterogeneous nuclear ribonucleoprotein H, N-terminally processed	1.27765	0.808266	5	5	4	14.7	14.7	14.5	49.229	0	70.273	26511000	9	P31943;P55795	P31943
SFN	14-3-3 protein sigma	2.06072	1.21879	1	1	1	3.2	3.2	3.2	27.774	0	53.786	11451000	4	P31947	P31947
STIP1	Stress-induced-phosphoprotein 1	-1.01167	-1.21707	1	1	1	1.7	1.7	1.7	62.639	0	7.2553	4475800	1	P31948	P31948
PRDX2	Peroxiredoxin-2	0.0908041	-0.807789	2	1	1	14.1	8.6	8.6	21.892	0.0091463	5.7724	6394200	1	P32119	P32119
DUT	Deoxyuridine 5-triphosphate nucleotidohydrolase, mitochondrial	-1.20133	-2.19226	2	2	2	10.7	10.7	10.7	26.563	0	11.999	9563400	2	P33316	P33316
PHB	Prohibitin	-0.178683	-0.832724	1	1	1	3.7	3.7	3.7	29.804	0	6.5387	7080900	1	P35232	P35232
RPL22	60S ribosomal protein L22	1.58886	0.624761	2	2	2	21.9	21.9	21.9	14.787	0	31.095	33389000	6	P35268	P35268
SCN1A	Sodium channel protein type 1 subunit alpha	-0.272378	-1.28778	1	1	1	0.4	0.4	0.4	228.97	0.0087977	5.7168	123840000	1	P35498	P35498
MYH9	Myosin-9	0.63009	-0.618052	1	1	1	0.5	0.5	0.5	226.53	0	6.2065	9479600	1	P35579	P35579
COPB2	Coatomer subunit beta	-2.16582	-1.99844	1	1	1	1.9	1.9	1.9	102.49	0.0031646	5.8207	2341000	1	P35606	P35606
RPL4	60S ribosomal protein L4	-0.556807	-1.28094	2	2	2	7.7	7.7	7.7	47.697	0	15.823	10394000	2	P36578	P36578
TAGLN2	Transgelin-2	1.85832	1.93245	4	4	4	19.6	19.6	19.6	22.391	0	47.446	66290000	10	P37802;Q9UI15	P37802
EIF4A3	Eukaryotic initiation factor 4A-III;Eukaryotic initiation factor 4A-III, N-terminally processed	-1.25692	-1.32549	1	1	1	2.7	2.7	2.7	46.871	0	9.3383	3662300	1	P38919	P38919
RPL3	60S ribosomal protein L3	-0.797772	-0.442243	2	2	2	6	6	6	46.108	0	12.968	9181400	2	P39023	P39023
RPL13A	60S ribosomal protein L13a	2.67309	0.464824	3	3	3	16.7	16.7	16.7	23.577	0	39.735	19496000	10	P40429;Q6NVV1	P40429
STAT3	Signal transducer and activator of transcription 3	-3.1347	-1.67777	1	1	1	1.2	1.2	1.2	88.067	0.0089286	5.7418	13621000	1	P40763	P40763
MDH1	Malate dehydrogenase, cytoplasmic	0.310699	0.173193	1	1	1	2.1	2.1	2.1	36.426	0	5.8608	6642700	1	P40925	P40925
MDH2	Malate dehydrogenase, mitochondrial	0.770574	-0.571054	5	5	5	18.3	18.3	18.3	35.503	0	49.895	14923000	5	P40926	P40926
GARS	Glycine--tRNA ligase	-0.98063	-0.0892897	1	1	1	1.1	1.1	1.1	83.165	0.0090361	5.7523	3365500	1	P41250	P41250
IARS	Isoleucine--tRNA ligase, cytoplasmic	-3.21735	-1.67952	1	1	1	1	1	1	144.5	0	6.0412	1139800	1	P41252	P41252
PSMC4	26S protease regulatory subunit 6B	-1.34641	-1.13807	2	2	1	5.7	5.7	3.3	47.366	0	16.302	5989400	1	P43686	P43686
VDAC2	Voltage-dependent anion-selective channel protein 2	-1.46911	-1.34659	1	1	1	4.1	4.1	4.1	31.566	0	6.0066	2095900	1	P45880	P45880
RPL5	60S ribosomal protein L5	-0.528514	-0.589995	1	1	1	4.7	4.7	4.7	34.362	0	13.733	6923000	3	P46777	P46777
RPL28	60S ribosomal protein L28	1.79634	-1.15447	4	4	3	28.5	28.5	21.2	15.747	0	25.169	16330000	4	P46779	P46779
RPS9	40S ribosomal protein S9	0.302056	-1.2643	1	1	1	4.1	4.1	4.1	22.591	0	6.0504	4263300	1	P46781	P46781
RPS5	40S ribosomal protein S5;40S ribosomal protein S5, N-terminally processed	1.13404	0.526046	3	3	3	16.2	16.2	16.2	22.876	0	39.186	27201000	5	P46782	P46782
RPL29	60S ribosomal protein L29	-2.69444	-3.06459	1	1	1	9.4	9.4	9.4	17.752	0	12.426	1337800	1	P47914	P47914
CCT5	T-complex protein 1 subunit epsilon	0.215825	-0.546517	2	2	2	3.9	3.9	3.9	59.67	0	12.557	6370100	2	P48643	P48643
RPL34	60S ribosomal protein L34	3.44235	3.12156	3	3	3	21.4	21.4	21.4	13.293	0	22.825	41012000	3	P49207	P49207
FASN	Fatty acid synthase;[Acyl-carrier-protein] S-acetyltransferase;[Acyl-carrier-protein] S-malonyltransferase;3-oxoacyl-[acyl-carrier-protein] synthase;3-oxoacyl-[acyl-carrier-protein] reductase;3-hydroxyacyl-[acyl-carrier-protein] dehydratase;Enoyl-[acyl-carrier-protein] reductase;Oleoyl-[acyl-carrier-protein] hydrolase	2.52083	1.97262	11	11	11	6	6	6	273.42	0	97.272	54107000	14	P49327	P49327
CCT3	T-complex protein 1 subunit gamma	-1.04774	-0.159913	2	2	2	3.9	3.9	3.9	60.533	0	15.808	8617300	4	P49368	P49368
TUFM	Elongation factor Tu, mitochondrial	-0.286865	-0.645739	2	2	2	5.8	5.8	5.8	49.541	0	19.376	15928000	2	P49411	P49411
GDI2	Rab GDP dissociation inhibitor beta	-0.381143	-1.0713	1	1	1	2.7	2.7	2.7	50.663	0	7.4835	4182000	1	P50395	P50395
SERPINH1	Serpin H1	1.12931	0.989593	2	2	2	4.3	4.3	4.3	46.44	0	17.647	12102000	3	P50454	P50454
CCT8	T-complex protein 1 subunit theta	1.72522	0.95448	3	3	3	6.4	6.4	6.4	59.62	0	183.49	19064000	4	P50990	P50990
CCT4	T-complex protein 1 subunit delta	0.596177	0.904242	3	3	3	6.3	6.3	6.3	57.924	0	323.31	17672000	6	P50991	P50991
HNRNPA3	Heterogeneous nuclear ribonucleoprotein A3	-3.085	-3.94872	2	1	1	7.7	5.8	5.8	39.594	0	26.654	9799700	1	P51991	P51991
HNRNPM	Heterogeneous nuclear ribonucleoprotein M	1.89391	1.37184	3	3	2	4.1	4.1	1.9	77.515	0	21.121	20887000	2	P52272	P52272
KPNA2	Importin subunit alpha-1	-2.95453	-2.32127	1	1	1	3.4	3.4	3.4	57.861	0	16.777	7741700	2	P52292	P52292
POLR2H	DNA-directed RNA polymerases I, II, and III subunit RPABC3	-3.06293	-4.19805	1	1	1	10.7	10.7	10.7	17.143	0.0086455	5.6999	1742500	1	P52434	P52434
ARHGDIA	Rho GDP-dissociation inhibitor 1	2.39804	0.131707	2	2	2	15.7	15.7	15.7	23.207	0	21.243	15225000	6	P52565	P52565
HNRNPF	Heterogeneous nuclear ribonucleoprotein F;Heterogeneous nuclear ribonucleoprotein F, N-terminally processed	-1.92913	-1.7886	1	1	1	3.1	3.1	3.1	45.671	0	6.8378	2267900	1	P52597	P52597
ACLY	ATP-citrate synthase	0.149016	-0.252783	2	2	2	2.4	2.4	2.4	120.84	0	20.325	5194500	3	P53396	P53396
ALDH18A1	Delta-1-pyrroline-5-carboxylate synthase;Glutamate 5-kinase;Gamma-glutamyl phosphate reductase	-2.99155	-2.51268	1	1	1	1.5	1.5	1.5	87.301	0	6.0954	801120	1	P54886	P54886
VCP	Transitional endoplasmic reticulum ATPase	1.20665	0.231427	3	3	3	4.5	4.5	4.5	89.321	0	246.1	14569000	4	P55072	P55072
SUMO2;SUMO3;SUMO4	Small ubiquitin-related modifier 2;Small ubiquitin-related modifier 3;Small ubiquitin-related modifier 4	-0.724603	-1.52876	1	1	1	12.6	12.6	12.6	10.871	0	10.051	5642100	2	P61956;P55854;Q6EEV6	P61956;P55854;Q6EEV6
CABP4	Calcium-binding protein 4	-0.0201082	1.35515	1	1	1	14.5	14.5	14.5	30.433	0.0083799	5.6629	676520000	3	P57796	P57796
MTPN	Myotrophin	-0.657178	-1.0127	1	1	1	14.4	14.4	14.4	12.895	0	15.28	3373800	1	P58546	P58546
TPI1	Triosephosphate isomerase	2.88327	3.19265	4	4	4	23.7	23.7	23.7	26.669	0	46.884	140650000	9	P60174	P60174
MYL6;MYL6B	Myosin light polypeptide 6;Myosin light chain 6B	1.86871	0.778921	2	2	2	16.6	16.6	16.6	16.93	0	24.557	25906000	4	P60660;P14649	P60660;P14649
ACTB	Actin, cytoplasmic 1;Actin, cytoplasmic 1, N-terminally processed	6.29238	5.85394	12	12	1	48.5	48.5	4.5	41.736	0	323.31	1205000000	50	P60709;P68133;P62736;P63267;P68032;Q6S8J3;Q562R1;A5A3E0;P0CG38;P0CG39;Q9BYX7	P60709
EIF4A1;EIF4A2	Eukaryotic initiation factor 4A-I;Eukaryotic initiation factor 4A-II;Eukaryotic initiation factor 4A-II, N-terminally processed	1.47309	0.771258	3	3	3	10.3	10.3	10.3	46.153	0	31.319	64785000	4	P60842;Q14240	P60842;Q14240
RPS20	40S ribosomal protein S20	-0.614276	-0.437064	3	3	3	22.7	22.7	22.7	13.373	0	30.077	7238400	3	P60866	P60866
PSMA6	Proteasome subunit alpha type-6	0.318851	0.543749	1	1	1	3.3	3.3	3.3	27.399	0	6.3949	9201300	1	P60900	P60900
RPS3A	40S ribosomal protein S3a	-0.453535	-1.10658	1	1	1	3.4	3.4	3.4	29.945	0.0084507	5.6686	4911200	1	P61247	P61247
RPL15	60S ribosomal protein L15	0.1804	0.30582	1	1	1	3.4	3.4	3.4	24.146	0	12.934	18077000	1	P61313	P61313
RPL37	60S ribosomal protein L37	-0.331319	0.131181	2	2	2	10.3	10.3	10.3	11.078	0	14.748	30965000	2	P61927	P61927
HNRNPK	Heterogeneous nuclear ribonucleoprotein K	-0.737096	-0.557206	3	3	3	6.7	6.7	6.7	50.976	0	18.79	10073000	3	P61978	P61978
RPS8	40S ribosomal protein S8	2.57498	2.06904	3	3	3	13.9	13.9	13.9	24.205	0	17.884	29129000	5	P62241	P62241
YWHAE	14-3-3 protein epsilon	2.76254	2.22324	3	3	3	15.7	15.7	15.7	29.174	0	117.38	64932000	12	P62258	P62258
RPS14	40S ribosomal protein S14	2.38601	0.13197	2	2	2	17.9	17.9	17.9	16.273	0	25.627	44425000	3	P62263	P62263
RPS23	40S ribosomal protein S23	-1.31463	-0.518608	1	1	1	7.7	7.7	7.7	15.807	0	10.582	5469100	2	P62266	P62266
RPS11	40S ribosomal protein S11	2.76133	1.03425	1	1	1	7	7	7	18.431	0	9.4817	11183000	2	P62280	P62280
RPL7A	60S ribosomal protein L7a	0.748015	0.467223	1	1	1	4.5	4.5	4.5	29.995	0	6.4131	13750000	2	P62424	P62424
RPS4X;RPS4Y2;RPS4Y1	40S ribosomal protein S4, X isoform;40S ribosomal protein S4, Y isoform 2;40S ribosomal protein S4, Y isoform 1	2.82205	2.46535	2	2	2	6.5	6.5	6.5	29.597	0	40.107	41377000	3	P62701;Q8TD47;P22090	P62701;Q8TD47;P22090
RPS6	40S ribosomal protein S6	0.581709	0.469098	2	2	2	7.6	7.6	7.6	28.68	0	81.75	8377800	6	P62753	P62753
HIST1H4A	Histone H4	2.47519	2.93718	4	4	4	21.4	21.4	21.4	11.367	0	40.04	33792000	7	P62805	P62805
RAN	GTP-binding nuclear protein Ran	1.27533	-0.721505	3	3	3	14.8	14.8	14.8	24.423	0	21.655	17462000	5	P62826	P62826
RPL23	60S ribosomal protein L23	-2.2663	-4.82595	1	1	1	6.4	6.4	6.4	14.865	0	6.625	2616800	1	P62829	P62829
RPS25	40S ribosomal protein S25	-1.00955	-1.95667	1	1	1	8	8	8	13.742	0	6.5433	6673900	1	P62851	P62851
RPS26;RPS26P11	40S ribosomal protein S26;Putative 40S ribosomal protein S26-like 1	0.998907	-0.202571	1	1	1	7.8	7.8	7.8	13.015	0	6.5196	13562000	2	P62854;Q5JNZ5	P62854;Q5JNZ5
RPS28	40S ribosomal protein S28	4.14704	0.610675	4	4	4	43.5	43.5	43.5	7.8409	0	94.345	109330000	13	P62857	P62857
GNB1;GNB2;GNB4	Guanine nucleotide-binding protein G(I)/G(S)/G(T) subunit beta-1;Guanine nucleotide-binding protein G(I)/G(S)/G(T) subunit beta-2;Guanine nucleotide-binding protein subunit beta-4	-1.54185	-1.21868	1	1	1	2.9	2.9	2.9	37.377	0	9.2232	7708000	2	P62873;P62879;Q9HAV0	P62873;P62879;Q9HAV0
RPL30	60S ribosomal protein L30	-0.422937	-1.11386	1	1	1	13.9	13.9	13.9	12.784	0	19.618	26194000	3	P62888	P62888
RPL32	60S ribosomal protein L32	3.53426	3.78592	2	2	2	14.8	14.8	14.8	15.86	0	36.38	100190000	5	P62910	P62910
RPL8	60S ribosomal protein L8	0.888927	0.530542	2	2	2	8.9	8.9	8.9	28.024	0	19.357	13456000	3	P62917	P62917
PPIA	Peptidyl-prolyl cis-trans isomerase A;Peptidyl-prolyl cis-trans isomerase A, N-terminally processed	4.41218	3.49882	5	5	5	20.6	20.6	20.6	18.012	0	36.401	203020000	14	P62937;F5H284;P0DN37;Q9Y536;P0DN26;A0A0B4J2A2;A0A075B767;A0A075B759	P62937
FKBP1A	Peptidyl-prolyl cis-trans isomerase FKBP1A	1.239	-0.682477	1	1	1	12	12	12	11.951	0	70.522	16906000	4	P62942	P62942
YWHAZ	14-3-3 protein zeta/delta	-0.295648	-0.0481844	3	3	2	20.4	20.4	16.7	27.745	0	41.796	18007000	4	P63104	P63104
GNB2L1	Guanine nucleotide-binding protein subunit beta-2-like 1;Guanine nucleotide-binding protein subunit beta-2-like 1, N-terminally processed	1.23277	1.17063	3	3	3	11.4	11.4	11.4	35.076	0	22.052	16586000	3	P63244	P63244
ACTG1	Actin, cytoplasmic 2;Actin, cytoplasmic 2, N-terminally processed	1.74943	0.66394	12	1	1	48.5	4.5	4.5	41.792	0	17.302	51124000	2	P63261	P63261
EEF1A1;EEF1A1P5	Elongation factor 1-alpha 1;Putative elongation factor 1-alpha-like 3	3.89168	3.1335	5	5	5	13.9	13.9	13.9	50.14	0	263.12	301630000	15	P68104;Q5VTE0;Q05639	P68104;Q5VTE0
TUBA1B;TUBA1C;TUBA1A	Tubulin alpha-1B chain;Tubulin alpha-1C chain;Tubulin alpha-1A chain	4.28575	3.6888	5	5	5	11.8	11.8	11.8	50.151	0	323.31	848390000	22	P68363;Q9BQE3;Q71U36;Q6PEY2;P0DPH8;P0DPH7;P68366;Q9NY65	P68363;Q9BQE3;Q71U36
TUBB4B	Tubulin beta-4B chain	0.175401	-0.310924	3	1	1	10.1	3.4	3.4	49.83	0	14.117	32226000	5	P68371;P04350;Q3ZCM7	P68371
HIST1H3A;H3F3A;HIST2H3A;HIST3H3;H3F3C	Histone H3.1;Histone H3.3;Histone H3.2;Histone H3.1t;Histone H3.3C	8.14629	6.51801	4	4	4	18.4	18.4	18.4	15.404	0	95.336	2507600000	25	P68431;P84243;Q71DI3;Q16695;Q6NXT2;Q5TEC6	P68431;P84243;Q71DI3;Q16695;Q6NXT2
GSTO1	Glutathione S-transferase omega-1	-0.389344	0.669115	1	1	1	5.8	5.8	5.8	27.566	0	13.589	10806000	3	P78417	P78417
RPL19	60S ribosomal protein L19	1.81452	1.37923	2	2	2	13.3	13.3	13.3	23.466	0	31.677	35304000	5	P84098	P84098
SRSF3	Serine/arginine-rich splicing factor 3	1.66352	1.03875	2	2	2	23.2	23.2	23.2	19.329	0	19.405	78360000	3	P84103	P84103
SLC25A3	Phosphate carrier protein, mitochondrial	-1.07295	0.987923	1	1	1	3.3	3.3	3.3	40.094	0	9.271	9980400	1	Q00325	Q00325
CLTC	Clathrin heavy chain 1	0.222025	-1.26814	3	3	3	2.9	2.9	2.9	191.61	0	39.296	24716000	6	Q00610	Q00610
HNRNPU	Heterogeneous nuclear ribonucleoprotein U	1.47519	0.377452	2	2	2	2.1	2.1	2.1	90.583	0	13.823	19818000	3	Q00839	Q00839
DSG1	Desmoglein-1	-3.24241	-2.08915	1	1	1	1.5	1.5	1.5	113.75	0	20.656	5690400	1	Q02413	Q02413
RPL18A	60S ribosomal protein L18a	1.16875	1.11264	3	3	3	16.5	16.5	16.5	20.762	0	20.961	11876000	3	Q02543	Q02543
RPL6	60S ribosomal protein L6	-0.103008	-0.956254	1	1	1	3.1	3.1	3.1	32.728	0	13.122	7001000	4	Q02878	Q02878
EIF4G1	Eukaryotic translation initiation factor 4 gamma 1	-0.154041	-0.42837	2	2	2	2.3	2.3	2.3	175.49	0	11.566	8685800	2	Q04637	Q04637
PRDX1	Peroxiredoxin-1	2.57629	2.21656	3	3	2	14.6	14.6	9	22.11	0	122.19	84814000	6	Q06830	Q06830
DHX9	ATP-dependent RNA helicase A	0.902511	-0.169556	4	4	4	5.1	5.1	5.1	140.96	0	37.626	24879000	9	Q08211	Q08211
RBBP7;RBBP4	Histone-binding protein RBBP7;Histone-binding protein RBBP4	0.327549	-0.98016	1	1	1	1.6	1.6	1.6	47.82	0	5.847	3609500	1	Q16576;Q09028	Q16576;Q09028
ILF3	Interleukin enhancer-binding factor 3	-1.16484	-0.349748	3	3	3	3.7	3.7	3.7	95.337	0	37.355	10765000	3	Q12906	Q12906
TRAP1	Heat shock protein 75 kDa, mitochondrial	-1.60796	-1.33248	1	1	1	1.4	1.4	1.4	80.109	0	6.482	1918200	1	Q12931	Q12931
HNRNPA0	Heterogeneous nuclear ribonucleoprotein A0	-0.305736	-2.2027	1	1	1	4.9	4.9	4.9	30.84	0.0086705	5.7034	3922300	1	Q13151	Q13151
SRSF6;SRSF4;SRSF5	Serine/arginine-rich splicing factor 6;Serine/arginine-rich splicing factor 4;Serine/arginine-rich splicing factor 5	1.34729	2.6528	2	2	2	5.2	5.2	5.2	39.586	0	12.848	15070000	2	Q13247;Q08170;Q13243	Q13247;Q08170;Q13243
MAD2L1	Mitotic spindle assembly checkpoint protein MAD2A	-0.677495	-2.87085	1	1	1	4.9	4.9	4.9	23.51	0	6.547	6032200	1	Q13257	Q13257
TRIM28	Transcription intermediary factor 1-beta	-0.092823	-0.790788	4	4	3	8.6	8.6	4.9	88.549	0	34.382	29313000	5	Q13263	Q13263
EIF3I	Eukaryotic translation initiation factor 3 subunit I	1.3112	0.555367	2	2	2	6.2	6.2	6.2	36.501	0	13.067	23476000	2	Q13347	Q13347
TCOF1	Treacle protein	-2.10345	-0.683564	1	1	1	0.7	0.7	0.7	152.1	0.0031546	5.8147	9861100	1	Q13428	Q13428
GANAB	Neutral alpha-glucosidase AB	0.0850792	0.0811138	2	2	2	1.7	1.7	1.7	106.87	0	12.036	17165000	2	Q14697	Q14697
KPNB1	Importin subunit beta-1	0.563535	-0.09659	1	1	1	1.6	1.6	1.6	97.169	0	12.308	4320200	1	Q14974	Q14974
TMEM132D	Transmembrane protein 132D	1.90697	3.17575	1	1	1	0.7	0.7	0.7	122.31	0.0088235	5.717	108870000	1	Q14C87	Q14C87
EFTUD2	116 kDa U5 small nuclear ribonucleoprotein component	-4.80362	-2.05642	1	1	1	1.3	1.3	1.3	109.43	0	5.8732	968130	1	Q15029	Q15029
NONO	Non-POU domain-containing octamer-binding protein	-2.2523	-3.08206	2	1	1	4.7	3	3	54.231	0	12.154	3796400	1	Q15233	Q15233
PCBP2;PCBP1;PCBP3	Poly(rC)-binding protein 2;Poly(rC)-binding protein 1;Poly(rC)-binding protein 3	2.63417	2.03098	4	4	4	13.7	13.7	13.7	38.58	0	30.704	49078000	7	Q15366;Q15365;P57721;P57723	Q15366;Q15365;P57721
TOMM20	Mitochondrial import receptor subunit TOM20 homolog	-1.49834	-1.12164	1	1	1	9	9	9	16.298	0	13.168	7927100	3	Q15388	Q15388
SLC1A5	Neutral amino acid transporter B(0)	-4.32443	-2.61172	1	1	1	3.7	3.7	3.7	56.598	0.003125	5.7982	999450	1	Q15758	Q15758
ADRM1	Proteasomal ubiquitin receptor ADRM1	-3.82645	-2.99126	1	1	1	3.9	3.9	3.9	42.153	0	7.5005	1171500	1	Q16186	Q16186
FSCN1	Fascin	-2.04452	-1.7563	1	1	1	1.8	1.8	1.8	54.529	0	6.0451	2275100	1	Q16658	Q16658
TIMM50	Mitochondrial import inner membrane translocase subunit TIM50	-1.7135	-1.57992	1	1	1	3.1	3.1	3.1	39.646	0	8.4676	3600000	1	Q3ZCQ8	Q3ZCQ8
TCHHL1	Trichohyalin-like protein 1	3.32504	4.71702	1	1	1	1.4	1.4	1.4	99.274	0	13.747	116100000	3	Q5QJ38	Q5QJ38
ATAD3A;ATAD3B;ATAD3C	ATPase family AAA domain-containing protein 3A;ATPase family AAA domain-containing protein 3B;ATPase family AAA domain-containing protein 3C	-0.0940304	-1.96509	1	1	1	1.3	1.3	1.3	71.368	0	6.1358	2271300	1	Q9NVI7;Q5T9A4;Q5T2N8	Q9NVI7;Q5T9A4;Q5T2N8
KPRP	Keratinocyte proline-rich protein	-0.360716	0.426096	1	1	1	1.6	1.6	1.6	64.135	0.0092879	5.7802	20661000	1	Q5T749	Q5T749
CROCC	Rootletin	-1.15821	-1.46635	1	1	1	0.4	0.4	0.4	228.52	0	6.6228	2138900	1	Q5TZA2	Q5TZA2
LYPLAL1	Lysophospholipase-like protein 1	-1.0345	0.417598	1	1	1	16	16	16	26.316	0.0087209	5.7059	44352000	2	Q5VWZ2	Q5VWZ2
COLCA1	Colorectal cancer-associated protein 1	0.631073	1.59039	1	1	1	28.2	28.2	28.2	13.401	0.0083565	5.66	43720000	2	Q6ZS62	Q6ZS62
USP34	Ubiquitin carboxyl-terminal hydrolase 34	-0.169179	0.49141	1	1	1	0.4	0.4	0.4	404.23	0	8.5122	14966000	2	Q70CQ2	Q70CQ2
GCC2	GRIP and coiled-coil domain-containing protein 2	0.706027	0.819822	1	1	1	0.7	0.7	0.7	195.91	0.0090634	5.7532	87458000	1	Q8IWJ2	Q8IWJ2
SERBP1	Plasminogen activator inhibitor 1 RNA-binding protein	0.113694	0.143626	2	2	2	6.6	6.6	6.6	44.965	0	21.28	9890400	2	Q8NC51	Q8NC51
SYNE1	Nesprin-1	2.18257	3.49154	1	1	1	0.2	0.2	0.2	1011.1	0	6.0194	124560000	1	Q8NF91	Q8NF91
CMAS	N-acylneuraminate cytidylyltransferase	-1.14945	-1.63516	1	1	1	2.3	2.3	2.3	48.379	0	9.0471	2910000	1	Q8NFW8	Q8NFW8
ANGPTL6	Angiopoietin-related protein 6	1.30411	3.12535	1	1	1	1.5	1.5	1.5	51.694	0	70.668	116880000	3	Q8NI99	Q8NI99
TMEM171	Transmembrane protein 171	-1.14013	0.825037	1	1	1	4	4	4	34.759	0	6.016	2495900000	1	Q8WVE6	Q8WVE6
SCG3	Secretogranin-3	4.62685	6.01288	1	1	1	2.8	2.8	2.8	53.005	0	6.1808	2318900000	5	Q8WXD2	Q8WXD2
DDX17	Probable ATP-dependent RNA helicase DDX17	-1.74924	-2.92465	1	1	1	1.6	1.6	1.6	80.272	0	6.3316	2071200	2	Q92841	Q92841
KHSRP	Far upstream element-binding protein 2	-2.46691	-2.2167	3	2	2	4.4	3.2	3.2	73.114	0	14.597	1730500	3	Q92945;Q96I24	Q92945
FUBP1	Far upstream element-binding protein 1	1.73825	1.99535	3	3	2	4.2	4.2	3	67.56	0	96.575	31836000	3	Q96AE4	Q96AE4
ABCC12	Multidrug resistance-associated protein 9	0.986462	3.60933	1	1	1	2.4	2.4	2.4	152.3	0	6.3362	536610000	10	Q96J65	Q96J65
ZNF469	Zinc finger protein 469	-0.822528	-1.34184	1	1	1	0.2	0.2	0.2	410.2	0.0062305	5.7953	2998200	1	Q96JG9	Q96JG9
HMCN1	Hemicentin-1	6.26449	6.82049	1	1	1	0.1	0.1	0.1	613.38	0	7.4355	3664200000	9	Q96RW7	Q96RW7
TBCB	Tubulin-folding cofactor B	0.289092	-1.06384	3	3	3	11.1	11.1	11.1	27.325	0	23.395	16134000	5	Q99426	Q99426
PARK7	Protein deglycase DJ-1	-2.42458	-4.39659	1	1	1	13.8	13.8	13.8	19.891	0	10.023	1771700	1	Q99497	Q99497
CCT7	T-complex protein 1 subunit eta	-1.28839	-1.32694	1	1	1	2.2	2.2	2.2	59.366	0	9.5082	900280	1	Q99832	Q99832
DPYSL5	Dihydropyrimidinase-related protein 5	5.63289	4.56052	1	1	1	1.2	1.2	1.2	61.421	0	24.193	381830000	5	Q9BPU6	Q9BPU6
RAB1B	Ras-related protein Rab-1B	-0.314585	-1.7605	1	1	1	5	5	5	22.171	0	7.4139	3749500	2	Q9H0U4	Q9H0U4
BCL11A	B-cell lymphoma/leukemia 11A	5.1566	6.54925	1	1	1	1.9	1.9	1.9	91.196	0	10.677	2152400000	6	Q9H165	Q9H165
CPVL	Probable serine carboxypeptidase CPVL	-4.07064	-1.88509	1	1	1	2.7	2.7	2.7	54.163	0	6.0445	3046900	1	Q9H3G5	Q9H3G5
BOLA2	BolA-like protein 2	-0.921517	-1.62455	1	1	1	10.5	10.5	10.5	10.116	0.0083102	5.6591	3049000	1	Q9H3K6	Q9H3K6
GOLPH3	Golgi phosphoprotein 3	1.13665	2.43625	1	1	1	5.7	5.7	5.7	33.81	0	6.0851	61073000	2	Q9H4A6	Q9H4A6
ENY2	Transcription and mRNA export factor ENY2	0.75619	0.92905	1	1	1	7.9	7.9	7.9	11.528	0.009009	5.7508	11963000	1	Q9NPA8	Q9NPA8
IGF2BP1	Insulin-like growth factor 2 mRNA-binding protein 1	-4.56613	-2.70119	1	1	1	2.9	2.9	2.9	63.48	0	19.667	4099200	1	Q9NZI8	Q9NZI8
MYOF	Myoferlin	-3.36926	-2.09105	1	1	1	1.3	1.3	1.3	234.71	0.0082192	5.6533	6199300	1	Q9NZM1	Q9NZM1
ARHGAP20	Rho GTPase-activating protein 20	-0.513181	1.24717	1	1	1	1.7	1.7	1.7	132.61	0	6.1615	10152000	1	Q9P2F6	Q9P2F6
EIF3K	Eukaryotic translation initiation factor 3 subunit K	-1.16336	-1.27681	1	1	1	6.4	6.4	6.4	25.059	0	13.742	4518400	1	Q9UBQ5	Q9UBQ5
UBA2	SUMO-activating enzyme subunit 2	-0.318763	-0.834136	2	2	2	3.9	3.9	3.9	71.223	0	12.333	5844600	2	Q9UBT2	Q9UBT2
ZNF215	Zinc finger protein 215	6.55153	8.05399	1	1	1	2.9	2.9	2.9	60.034	0	14.372	5035200000	18	Q9UL58	Q9UL58
PA2G4	Proliferation-associated protein 2G4	1.38398	0.306286	2	2	2	6.9	6.9	6.9	43.786	0	13.529	13006000	4	Q9UQ80	Q9UQ80
RUVBL2	RuvB-like 2	-3.4845	-3.18825	1	1	1	2.4	2.4	2.4	51.156	0	6.3144	1826000	1	Q9Y230	Q9Y230
RUVBL1	RuvB-like 1	-2.63991	-2.92497	1	1	1	3.9	3.9	3.9	50.227	0	13.965	6467800	2	Q9Y265	Q9Y265
ENPP4	Bis(5-adenosyl)-triphosphatase ENPP4	-3.79385	1.60794	2	2	2	4.9	4.9	4.9	51.641	0	19.924	8047300	3	Q9Y6X5	Q9Y6X5

## Sheet: Fig. 4B data
Identified proteins in profile plot Fig. 4B (6Yn-Pro+NRH vs DMSO+NRH control)
Gene names	Protein names	DMSO+NRH (Log2 intensity)	6Yn-Pro+NRH (Log2 intensity)	Peptides	Razor + unique peptides	Unique peptides	Sequence coverage [%]	Unique + razor sequence coverage [%]	Unique sequence coverage [%]	Mol. weight [kDa]	Q-value	Score	Intensity	MS/MS count	Protein IDs	Majority protein IDs
HNRNPC;HNRNPCL1;HNRNPCL3;HNRNPCL2;HNRNPCL4	Heterogeneous nuclear ribonucleoproteins C1/C2;Heterogeneous nuclear ribonucleoprotein C-like 1;Heterogeneous nuclear ribonucleoprotein C-like 3;Heterogeneous nuclear ribonucleoprotein C-like 2;Heterogeneous nuclear ribonucleoprotein C-like 4	2.26345	1.85687	2	2	2	5.2	5.2	5.2	33.67	0	53.177	119460000	4	P07910;O60812;B7ZW38;B2RXH8;P0DMR1;A0A0G2JPF8;A0A0G2JNQ3	P07910;O60812;B7ZW38;B2RXH8;P0DMR1;A0A0G2JPF8;A0A0G2JNQ3
HIST3H2BB	Histone H2B type 3-B	-0.0927973	0.550792	1	1	1	5.6	5.6	5.6	13.908	0	6.3914	3717800	2	Q8N257;A0A2R8Y619	Q8N257;A0A2R8Y619
RAP1B;RAP1A	Ras-related protein Rap-1b;Ras-related protein Rap-1A;Ras-related protein Rap-1b-like protein	1.25264	0.59509	1	1	1	4.3	4.3	4.3	20.825	0	6.4777	31666000	1	P61224;P62834;A6NIZ1	P61224;P62834;A6NIZ1
EIF3C;EIF3CL	Eukaryotic translation initiation factor 3 subunit C;Eukaryotic translation initiation factor 3 subunit C-like protein	-2.43534	-2.2996	1	1	1	0.9	0.9	0.9	105.34	0.0080972	5.92	1800600	1	Q99613;B5ME19	Q99613;B5ME19
CLIC1	Chloride intracellular channel protein 1	-1.5751	-0.641342	1	1	1	5	5	5	26.922	0	7.7799	4867800	4	O00299	O00299
DDX3X;DDX3Y;DDX4	ATP-dependent RNA helicase DDX3X;ATP-dependent RNA helicase DDX3Y;Probable ATP-dependent RNA helicase DDX4	-2.38234	-1.91097	1	1	1	1.4	1.4	1.4	73.243	0.0076336	5.8576	2932800	1	O00571;O15523;Q9NQI0	O00571;O15523;Q9NQI0
PPP6C	Serine/threonine-protein phosphatase 6 catalytic subunit;Serine/threonine-protein phosphatase 6 catalytic subunit, N-terminally processed	-1.00128	-0.854437	1	1	1	2.3	2.3	2.3	35.144	0.008658	6.0338	2252000	1	O00743	O00743
EIF1AX;EIF1AY	Eukaryotic translation initiation factor 1A, X-chromosomal;Eukaryotic translation initiation factor 1A, Y-chromosomal	1.37228	0.944885	1	1	1	4.9	4.9	4.9	16.46	0.0081301	5.9249	15154000	2	P47813;O14602	P47813;O14602
ATP2A2;ATP2A1	Sarcoplasmic/endoplasmic reticulum calcium ATPase 2;Sarcoplasmic/endoplasmic reticulum calcium ATPase 1	-0.154416	0.227307	1	1	1	0.9	0.9	0.9	114.76	0	7.0424	8427900	2	P16615;O14983	P16615;O14983
SPTBN2	Spectrin beta chain, non-erythrocytic 2	1.61637	3.70859	2	2	2	0.6	0.6	0.6	271.32	0	12.257	148200000	4	O15020	O15020
PHGDH	D-3-phosphoglycerate dehydrogenase	-1.41605	-1.27795	1	1	1	2.8	2.8	2.8	56.65	0	26.881	10893000	1	O43175	O43175
SYNCRIP;HNRNPR	Heterogeneous nuclear ribonucleoprotein Q;Heterogeneous nuclear ribonucleoprotein R	0.0803146	-0.745296	1	1	1	1.3	1.3	1.3	69.602	0	6.4588	3995100	1	O60506;O43390	O60506;O43390
ZNF207	BUB3-interacting and GLEBS motif-containing protein ZNF207	-3.85595	-3.87041	1	1	1	2.7	2.7	2.7	50.75	0.0088889	6.0593	3560800	1	O43670	O43670
KIF1B	Kinesin-like protein KIF1B	0.922211	1.75584	1	1	1	0.5	0.5	0.5	204.47	0.0089686	6.0829	12812000	3	O60333	O60333
HIST1H2BB;HIST1H2BH;HIST1H2BN;HIST2H2BE;HIST1H2BC;HIST1H2BD;HIST1H2BK;HIST2H2BF;HIST1H2BO;HIST1H2BM;H2BFS;HIST1H2BJ;HIST1H2BL;HIST1H2BA;HIST2H2BD;HIST2H2BC	Histone H2B type 1-B;Histone H2B type 1-H;Histone H2B type 1-N;Histone H2B type 2-E;Histone H2B type 1-C/E/F/G/I;Histone H2B type 1-D;Histone H2B type 1-K;Histone H2B type 2-F;Histone H2B type 1-O;Histone H2B type 1-M;Histone H2B type F-S;Histone H2B type 1-J;Histone H2B type 1-L;Histone H2B type 1-A;Putative histone H2B type 2-D;Putative histone H2B type 2-C	2.80837	3.99302	2	2	2	11.1	11.1	11.1	13.95	0	79.108	170000000	6	P33778;Q93079;Q99877;Q16778;P62807;P58876;O60814;Q5QNW6;P23527;Q99879;P57053;P06899;Q99880;Q96A08;Q6DRA6;Q6DN03	P33778;Q93079;Q99877;Q16778;P62807;P58876;O60814;Q5QNW6;P23527;Q99879;P57053;P06899;Q99880;Q96A08;Q6DRA6;Q6DN03
KIN	DNA/RNA-binding protein KIN17	0.764106	0.240878	1	1	1	2	2	2	45.373	0	6.3223	6196800	1	O60870	O60870
KIF21B	Kinesin-like protein KIF21B	1.15737	3.70888	1	1	1	1.6	1.6	1.6	182.66	0.0073801	5.8085	8506000000	10	O75037	O75037
TBCA	Tubulin-specific chaperone A	0.743577	0.168535	1	1	1	8.3	8.3	8.3	12.855	0	7.0044	14373000	2	O75347	O75347
CS	Citrate synthase, mitochondrial	-2.57771	-4.09151	1	1	1	3.4	3.4	3.4	51.712	0	15.173	6531300	4	O75390	O75390
EIF3G	Eukaryotic translation initiation factor 3 subunit G	0.188924	0.012114	2	2	2	5.3	5.3	5.3	35.611	0	11.528	11055000	2	O75821	O75821
UTS2	Urotensin-2	0.189992	1.2249	1	1	1	6.5	6.5	6.5	14.295	0	36.342	81649000	3	O95399	O95399
LDHA	L-lactate dehydrogenase A chain	2.91588	2.85639	1	1	1	3	3	3	36.688	0	323.31	78011000	4	P00338	P00338
PGK1	Phosphoglycerate kinase 1	0.839602	1.1025	3	3	3	6.5	6.5	6.5	44.614	0	19.821	25077000	5	P00558	P00558
PLG	Plasminogen;Plasmin heavy chain A;Activation peptide;Angiostatin;Plasmin heavy chain A, short form;Plasmin light chain B	-1.9894	-2.19393	1	1	1	1.1	1.1	1.1	90.568	0.0074906	5.8297	6579000	1	P00747	P00747
PLAU	Urokinase-type plasminogen activator;Urokinase-type plasminogen activator long chain A;Urokinase-type plasminogen activator short chain A;Urokinase-type plasminogen activator chain B	6.53486	7.37927	1	1	1	2.3	2.3	2.3	48.507	0	6.5302	1870200000	9	P00749	P00749
APOC3	Apolipoprotein C-III	-1.76416	-0.959156	1	1	1	16.2	16.2	16.2	10.852	0	82.919	15349000	3	P02656	P02656
ALDOA	Fructose-bisphosphate aldolase A	0.100187	-0.193717	2	2	2	8.5	8.5	8.5	39.42	0	37.697	43616000	5	P04075	P04075
GAPDH	Glyceraldehyde-3-phosphate dehydrogenase	2.61839	1.19779	2	2	2	4.8	4.8	4.8	36.053	0	24.908	48432000	2	P04406	P04406
ATP1A1;ATP1A3;ATP1A2	Sodium/potassium-transporting ATPase subunit alpha-1;Sodium/potassium-transporting ATPase subunit alpha-3;Sodium/potassium-transporting ATPase subunit alpha-2	-0.249574	-0.732863	2	2	2	2.5	2.5	2.5	112.89	0	42.643	7558300	3	P05023;P13637;P50993	P05023;P13637;P50993
SLC25A5;SLC25A6;SLC25A4;SLC25A31	ADP/ATP translocase 2;ADP/ATP translocase 2, N-terminally processed;ADP/ATP translocase 3;ADP/ATP translocase 3, N-terminally processed;ADP/ATP translocase 1;ADP/ATP translocase 4;ADP/ATP translocase 4, N-terminally processed	-0.690784	-0.79494	2	2	1	5.7	5.7	2.7	32.852	0	10.254	8721200	1	P05141;P12236;P12235;Q9H0C2	P05141;P12236;P12235;Q9H0C2
EIF2S1	Eukaryotic translation initiation factor 2 subunit 1	0.158729	0.0466695	1	1	1	3.8	3.8	3.8	36.112	0	67.977	8828200	2	P05198	P05198
HMGN2	Non-histone chromosomal protein HMG-17	0.374296	2.08834	1	1	1	8.9	8.9	8.9	9.3926	0.0047619	6.2034	3710800	1	P05204	P05204
ATP5G1;ATP5G3;ATP5G2	ATP synthase F(0) complex subunit C1, mitochondrial;ATP synthase F(0) complex subunit C3, mitochondrial;ATP synthase F(0) complex subunit C2, mitochondrial	2.70713	0.813091	1	1	1	5.1	5.1	5.1	14.277	0.0048077	6.2363	50287000	4	P05496;P48201;Q06055	P05496;P48201;Q06055
GPI;SIX5	Glucose-6-phosphate isomerase;Homeobox protein SIX5	2.63727	2.57255	2	2	2	2.5	2.5	2.5	63.146	0	12.827	42468000	4	P06744;Q8N196	P06744;Q8N196
NPM1	Nucleophosmin	0.538803	0.197921	1	1	1	4.4	4.4	4.4	32.575	0	19.336	29148000	2	P06748	P06748
HEXA	Beta-hexosaminidase subunit alpha	2.41097	2.77899	1	1	1	1.3	1.3	1.3	60.702	0.0046296	6.1539	52987000	2	P06865	P06865
TUBB;TUBB2B;TUBB2A;TUBB4B;TUBB3	Tubulin beta chain;Tubulin beta-2B chain;Tubulin beta-2A chain;Tubulin beta-4B chain;Tubulin beta-3 chain	3.31052	3.53796	4	4	4	11.9	11.9	11.9	49.67	0	85.899	195460000	14	P07437;Q9BVA1;Q13885;P68371;Q13509;Q3ZCM7;Q9H4B7;CON__ENSEMBL:ENSBTAP00000025008;A6NNZ2	P07437;Q9BVA1;Q13885;P68371;Q13509
HEXB	Beta-hexosaminidase subunit beta;Beta-hexosaminidase subunit beta chain B;Beta-hexosaminidase subunit beta chain A	1.20394	2.38003	1	1	1	1.3	1.3	1.3	63.111	0.0087719	6.0488	28173000	1	P07686	P07686
PFN1	Profilin-1	-1.57224	-1.51016	1	1	1	10	10	10	15.054	0	19.674	9916800	4	P07737	P07737
APRT	Adenine phosphoribosyltransferase	-3.70667	-2.0873	1	1	1	6.1	6.1	6.1	19.608	0	12.506	5363500	3	P07741	P07741
HSP90AA1	Heat shock protein HSP 90-alpha	2.01755	0.725155	5	3	3	8.1	4.9	4.9	84.659	0	42.932	31101000	7	P07900;Q14568;Q58FF8	P07900
HSP90AB1	Heat shock protein HSP 90-beta	3.85299	2.77189	7	7	5	14.1	14.1	10.9	83.263	0	323.31	200100000	24	P08238;Q58FF7	P08238
SNRNP70	U1 small nuclear ribonucleoprotein 70 kDa	-3.22767	-2.64688	2	2	2	5.7	5.7	5.7	51.556	0	27.141	4420000	2	P08621	P08621
VIM;GFAP	Vimentin;Glial fibrillary acidic protein	-0.474229	-1.2696	2	2	2	5.8	5.8	5.8	53.651	0	20.122	11196000	2	P08670;P14136	P08670;P14136
ANXA5	Annexin A5	0.669737	0.897933	3	3	3	13.4	13.4	13.4	35.936	0	28.486	15142000	5	P08758	P08758
HNRNPA1	Heterogeneous nuclear ribonucleoprotein A1;Heterogeneous nuclear ribonucleoprotein A1, N-terminally processed	0.690277	-0.308948	2	2	2	7.8	7.8	7.8	38.746	0	42.517	16294000	2	P09651;A0A2R8Y4L2	P09651;A0A2R8Y4L2
PARP1	Poly [ADP-ribose] polymerase 1	1.46367	2.61324	3	3	3	3.6	3.6	3.6	113.08	0	36.122	31935000	5	P09874	P09874
UBC;UBB;RPS27A;UBA52	Polyubiquitin-C;Ubiquitin;Polyubiquitin-B;Ubiquitin;Ubiquitin-40S ribosomal protein S27a;Ubiquitin;40S ribosomal protein S27a;Ubiquitin-60S ribosomal protein L40;Ubiquitin;60S ribosomal protein L40	2.13594	1.4207	2	2	2	32.8	32.8	32.8	77.038	0	33.088	248550000	7	P0CG48;P0CG47;P62979;P62987;A0A2R8Y422	P0CG48;P0CG47;P62979;P62987;A0A2R8Y422
HSPA1A;HSPA1B	Heat shock 70 kDa protein 1A;Heat shock 70 kDa protein 1B	3.68289	2.95858	6	6	2	12	12	3.4	70.051	0	101.78	204220000	15	P0DMV8;P0DMV9;P34931	P0DMV8;P0DMV9
HIST1H1E	Histone H1.4	3.27967	4.17302	2	2	2	9.1	9.1	9.1	21.865	0	92.904	289410000	5	P10412	P10412
HSPD1	60 kDa heat shock protein, mitochondrial	-1.68356	-0.897398	1	1	1	4.4	4.4	4.4	61.054	0	58.399	32388000	6	P10809	P10809
HSPA5	78 kDa glucose-regulated protein	-1.87	-2.62514	3	3	3	8.1	8.1	8.1	72.332	0	48.266	14680000	7	P11021	P11021
HSPA8;HSPA2	Heat shock cognate 71 kDa protein;Heat shock-related 70 kDa protein 2	1.65156	1.29448	4	3	3	9.4	7.4	7.4	70.897	0	44.017	68250000	5	P11142;P54652	P11142;P54652
MTHFD1;MTHFD1L	C-1-tetrahydrofolate synthase, cytoplasmic;Methylenetetrahydrofolate dehydrogenase;Methenyltetrahydrofolate cyclohydrolase;Formyltetrahydrofolate synthetase;C-1-tetrahydrofolate synthase, cytoplasmic, N-terminally processed;Monofunctional C1-tetrahydrofolate synthase, mitochondrial	0.0056324	-0.476391	1	1	1	0.7	0.7	0.7	101.56	0.0084034	5.9861	8150400	1	P11586;Q6UB35	P11586;Q6UB35
PCNA	Proliferating cell nuclear antigen	-2.02618	-4.72111	1	1	1	7.3	7.3	7.3	28.768	0	21.49	9458700	1	P12004	P12004
IMPDH2;IMPDH1	Inosine-5-monophosphate dehydrogenase 2;Inosine-5-monophosphate dehydrogenase 1	0.00237179	0.769481	1	1	1	1.6	1.6	1.6	55.804	0.0080645	5.918	7389600	2	P12268;P20839	P12268;P20839
RNH1	Ribonuclease inhibitor	-0.995986	-0.899665	1	1	1	2.2	2.2	2.2	49.973	0	6.3941	5654100	1	P13489	P13489
EEF2	Elongation factor 2	3.37971	3.33705	4	4	4	4.3	4.3	4.3	95.337	0	145.6	90004000	8	P13639	P13639
PKM	Pyruvate kinase PKM	2.53841	2.5965	3	3	3	7.9	7.9	7.9	57.936	0	108.43	64949000	9	P14618;P30613	P14618
HSP90B1	Endoplasmin	0.0199919	-0.0454736	3	3	3	4.2	4.2	4.2	92.468	0	30.356	14916000	5	P14625;Q58FF3	P14625
HNRNPL	Heterogeneous nuclear ribonucleoprotein L	1.4629	1.57561	1	1	1	1.9	1.9	1.9	64.132	0	12.903	33424000	1	P14866	P14866
EZR	Ezrin	1.0498	1.19118	2	2	2	2.7	2.7	2.7	69.412	0	12.235	16768000	3	P15311	P15311
RPS2	40S ribosomal protein S2	-3.27629	-2.36071	1	1	1	3.1	3.1	3.1	31.324	0.009009	6.0949	6566300	1	P15880	P15880
DSP	Desmoplakin	-0.427842	0.57788	1	1	1	0.3	0.3	0.3	331.77	0	6.4336	7921800	1	P15924	P15924
HIST1H1D	Histone H1.3	1.54325	1.87923	1	1	1	7.2	7.2	7.2	22.35	0	34.684	33554000	4	P16402	P16402
HIST1H1C	Histone H1.2	2.94426	3.16257	1	1	1	7.5	7.5	7.5	21.364	0	26.208	180980000	5	P16403	P16403
HSPA6;HSPA7	Heat shock 70 kDa protein 6;Putative heat shock 70 kDa protein 7	0.183853	-0.444598	5	1	1	10.3	1.7	1.7	71.027	0	12.438	32467000	4	P17066;P48741	P17066;P48741
PFKL	ATP-dependent 6-phosphofructokinase, liver type	-2.38491	-0.689806	1	1	1	0.9	0.9	0.9	85.018	0.0046729	6.165	4099900	1	P17858	P17858
RPL7	60S ribosomal protein L7	0.660168	-0.0684028	1	1	1	7.7	7.7	7.7	29.225	0	35.832	27134000	3	P18124	P18124
NCL	Nucleolin	2.2564	1.82543	2	2	2	2.1	2.1	2.1	76.613	0	12.15	127800000	2	P19338	P19338
LMNB1;LMNA;LMNB2	Lamin-B1;Prelamin-A/C;Lamin-A/C;Lamin-B2	0.770007	0.715976	2	2	2	2.6	2.6	2.6	66.408	0	12.109	17627000	2	P20700;P02545;Q03252	P20700;P02545;Q03252
FLNA	Filamin-A	1.7959	1.65356	6	6	6	3.2	3.2	3.2	280.74	0	125.53	43979000	12	P21333	P21333
UBA1	Ubiquitin-like modifier-activating enzyme 1	1.96043	1.90682	4	4	4	3.9	3.9	3.9	117.85	0	30.877	47732000	4	P22314	P22314
NME2	Nucleoside diphosphate kinase B	0.849717	0.419936	1	1	1	4.6	4.6	4.6	17.298	0	6.2919	7743200	1	P22392	P22392
HNRNPA2B1	Heterogeneous nuclear ribonucleoproteins A2/B1	4.09731	3.67095	5	5	5	18.1	18.1	18.1	37.429	0	323.31	413790000	7	P22626	P22626
CFL1	Cofilin-1	2.79965	2.06709	2	2	2	12	12	12	18.502	0	20.933	38905000	7	P23528	P23528
DTYMK	Thymidylate kinase	-2.8296	-2.61142	1	1	1	4.7	4.7	4.7	23.819	0	6.6661	4651700	1	P23919	P23919
MCM3	DNA replication licensing factor MCM3	-4.8696	-2.78616	1	1	1	2.5	2.5	2.5	90.98	0	22.074	4541400	1	P25205	P25205
ATP5A1	ATP synthase subunit alpha, mitochondrial	0.49888	-0.258705	2	2	2	5.6	5.6	5.6	59.75	0	25.807	26326000	8	P25705	P25705
PSMA2	Proteasome subunit alpha type-2	-1.34761	-2.12354	1	1	1	3	3	3	25.898	0.0083682	5.9847	3221200	1	P25787	P25787
MSN	Moesin	0.727663	0.560668	1	1	1	1.4	1.4	1.4	67.819	0	6.4842	7910700	2	P26038	P26038
PTBP1	Polypyrimidine tract-binding protein 1	-1.96892	-3.07893	1	1	1	2.4	2.4	2.4	57.221	0	12.136	3590400	1	P26599	P26599
TARS	Threonine--tRNA ligase, cytoplasmic	0.613443	1.01776	1	1	1	1.1	1.1	1.1	83.434	0.0046512	6.1556	7824500	2	P26639	P26639
YWHAQ	14-3-3 protein theta	-0.291431	-0.271767	2	2	2	15.1	15.1	15.1	27.764	0	25.637	14416000	4	P27348	P27348
APEX1	DNA-(apurinic or apyrimidinic site) lyase;DNA-(apurinic or apyrimidinic site) lyase, mitochondrial	-2.21436	-1.4219	1	1	1	4.7	4.7	4.7	35.554	0	15.154	3820000	1	P27695	P27695
CALR	Calreticulin	-2.53957	-2.29407	1	1	1	2.2	2.2	2.2	48.141	0.0045455	6.0996	4208400	1	P27797	P27797
PSMB5	Proteasome subunit beta type-5	-2.25816	-1.71801	4	4	4	20.9	20.9	20.9	28.48	0	52.144	12978000	7	P28074	P28074
PDIA3	Protein disulfide-isomerase A3	-0.994964	-1.63392	1	1	1	2.2	2.2	2.2	56.782	0	6.9761	7874800	1	P30101	P30101
HNRNPH1	Heterogeneous nuclear ribonucleoprotein H;Heterogeneous nuclear ribonucleoprotein H, N-terminally processed	-1.48861	-1.52664	3	3	3	12.5	12.5	12.5	49.229	0	30.42	8838400	3	P31943;P55795	P31943
YWHAB	14-3-3 protein beta/alpha;14-3-3 protein beta/alpha, N-terminally processed	0.237583	0.148719	2	2	2	14.6	14.6	14.6	28.082	0	34.348	18665000	5	P31946	P31946
PRDX2	Peroxiredoxin-2	1.1815	1.45013	2	2	2	7.6	7.6	7.6	21.892	0	13.32	44262000	2	P32119	P32119
TTK	Dual specificity protein kinase TTK	6.43207	7.16302	1	1	1	0.8	0.8	0.8	97.071	0.0084388	5.9861	2444500000	22	P33981	P33981
PHB	Prohibitin	2.49888	2.33182	2	2	2	6.6	6.6	6.6	29.804	0	129.16	51618000	3	P35232	P35232
RPL22	60S ribosomal protein L22	-4.80658	-4.08556	1	1	1	11.7	11.7	11.7	14.787	0	6.359	3514800	1	P35268	P35268
CPOX	Oxygen-dependent coproporphyrinogen-III oxidase, mitochondrial	-3.151	-2.99528	1	1	1	3.7	3.7	3.7	50.151	0	6.4108	2983700	1	P36551	P36551
TALDO1	Transaldolase	0.71418	1.51496	1	1	1	2.4	2.4	2.4	37.54	0	7.1071	12835000	1	P37837	P37837
HSPA9	Stress-70 protein, mitochondrial	1.38404	1.67869	3	3	3	5.6	5.6	5.6	73.68	0	51.659	26413000	5	P38646	P38646
EIF4A3	Eukaryotic initiation factor 4A-III;Eukaryotic initiation factor 4A-III, N-terminally processed	-3.30614	-2.85906	1	1	1	3.2	3.2	3.2	46.871	0	10.56	17353000	1	P38919	P38919
RPL13A	60S ribosomal protein L13a	1.18752	0.669137	2	2	2	8.9	8.9	8.9	23.577	0	22.163	26293000	6	P40429	P40429
EIF2S3;EIF2S3L	Eukaryotic translation initiation factor 2 subunit 3;Putative eukaryotic translation initiation factor 2 subunit 3-like protein	-0.613295	-0.390292	1	1	1	1.5	1.5	1.5	51.109	0.0045662	6.1219	4244000	2	P41091;Q2VIR3	P41091;Q2VIR3
CDKN2A	Cyclin-dependent kinase inhibitor 2A	-2.43095	-2.61431	1	1	1	7.7	7.7	7.7	16.532	0	7.9147	1678700	2	P42771	P42771
CCT5	T-complex protein 1 subunit epsilon	0.906109	1.17434	1	1	1	1.8	1.8	1.8	59.67	0	6.832	12128000	3	P48643	P48643
NASP	Nuclear autoantigenic sperm protein	-1.59021	-0.70993	1	1	1	1	1	1	85.237	0.0076046	5.8522	4408100	1	P49321	P49321
FASN	Fatty acid synthase;[Acyl-carrier-protein] S-acetyltransferase;[Acyl-carrier-protein] S-malonyltransferase;3-oxoacyl-[acyl-carrier-protein] synthase;3-oxoacyl-[acyl-carrier-protein] reductase;3-hydroxyacyl-[acyl-carrier-protein] dehydratase;Enoyl-[acyl-carrier-protein] reductase;Oleoyl-[acyl-carrier-protein] hydrolase	-2.57008	-2.64726	2	2	2	0.8	0.8	0.8	273.42	0	12.36	2716800	2	P49327	P49327
CCT3	T-complex protein 1 subunit gamma	0.338764	0.367287	1	1	1	1.5	1.5	1.5	60.533	0	26.792	25715000	1	P49368	P49368
HINT1	Histidine triad nucleotide-binding protein 1	-0.649976	-0.177293	1	1	1	5.6	5.6	5.6	13.802	0.0079681	5.9028	4239000	2	P49773	P49773
GDI2	Rab GDP dissociation inhibitor beta	-2.93352	-1.93725	1	1	1	3.4	3.4	3.4	50.663	0	10.695	2510800	2	P50395	P50395
CCT8	T-complex protein 1 subunit theta	-1.82259	-2.15658	1	1	1	1.8	1.8	1.8	59.62	0	6.3436	14885000	1	P50990	P50990
CCT4	T-complex protein 1 subunit delta	0.296813	1.10818	2	2	2	4.5	4.5	4.5	57.924	0	21.799	17267000	3	P50991	P50991
RAB5C	Ras-related protein Rab-5C	-0.829679	-2.79795	1	1	1	5.6	5.6	5.6	23.482	0	7.1663	7407100	1	P51148	P51148
GPC3	Glypican-3;Secreted glypican-3	1.30529	2.76262	1	1	1	1.4	1.4	1.4	65.562	0.0080321	5.9175	839590000	1	P51654	P51654
HNRNPM	Heterogeneous nuclear ribonucleoprotein M	1.50988	1.54565	2	2	1	3.2	3.2	1	77.515	0	9.7491	29633000	1	P52272	P52272
ARHGDIA	Rho GDP-dissociation inhibitor 1	-1.02565	-1.95753	1	1	1	7.4	7.4	7.4	23.207	0	19.626	4319000	2	P52565	P52565
HNRNPF	Heterogeneous nuclear ribonucleoprotein F;Heterogeneous nuclear ribonucleoprotein F, N-terminally processed	-1.7549	-2.81936	1	1	1	3.1	3.1	3.1	45.671	0	10.986	3605600	1	P52597	P52597
ACLY	ATP-citrate synthase	-3.14407	-3.8132	1	1	1	1.4	1.4	1.4	120.84	0.0084746	5.9894	1044600	1	P53396	P53396
CSE1L	Exportin-2	-0.703116	-1.38576	3	3	3	3.6	3.6	3.6	110.42	0	23.166	8326400	3	P55060	P55060
VCP	Transitional endoplasmic reticulum ATPase	2.21677	2.16762	6	6	6	6.5	6.5	6.5	89.321	0	45.7	37297000	7	P55072	P55072
NPEPPS	Puromycin-sensitive aminopeptidase	0.403023	0.51725	1	1	1	0.8	0.8	0.8	103.28	0.0089286	6.075	8982900	1	P55786	P55786
TPI1	Triosephosphate isomerase	1.6227	2.32632	2	2	2	10	10	10	26.669	0	24.117	49382000	6	P60174	P60174
ACTB;ACTA1;ACTA2;ACTG2;ACTC1	Actin, cytoplasmic 1;Actin, cytoplasmic 1, N-terminally processed;Actin, alpha skeletal muscle;Actin, aortic smooth muscle;Actin, gamma-enteric smooth muscle;Actin, alpha cardiac muscle 1	5.94446	5.6748	7	7	1	20.8	20.8	4.5	41.736	0	323.31	1404300000	41	P60709;P68133;P62736;P63267;P68032;Q6S8J3;A5A3E0;P0CG38;P0CG39;Q9BYX7;Q562R1	P60709;P68133;P62736;P63267;P68032
EIF4A1;EIF4A2	Eukaryotic initiation factor 4A-I;Eukaryotic initiation factor 4A-II;Eukaryotic initiation factor 4A-II, N-terminally processed	-2.95399	-2.74039	1	1	1	4.7	4.7	4.7	46.153	0	18.219	15494000	2	P60842;Q14240	P60842;Q14240
RPS20	40S ribosomal protein S20	-3.58057	-2.73557	1	1	1	9.2	9.2	9.2	13.373	0	7.7097	1769200	1	P60866	P60866
DSTN	Destrin	-2.84676	-1.25631	1	1	1	7.3	7.3	7.3	18.506	0	54.868	8925600	2	P60981	P60981
RPS3A	40S ribosomal protein S3a	3.04414	2.10771	3	3	3	9.1	9.1	9.1	29.945	0	21.694	41535000	6	P61247	P61247
RPL15	60S ribosomal protein L15	1.71444	2.28443	1	1	1	4.4	4.4	4.4	24.146	0	7.5384	40753000	2	P61313	P61313
HNRNPK	Heterogeneous nuclear ribonucleoprotein K	1.00844	1.24998	2	2	2	5.6	5.6	5.6	50.976	0	35.197	30887000	5	P61978	P61978
YWHAE	14-3-3 protein epsilon	0.464743	0.49299	2	2	2	9.8	9.8	9.8	29.174	0	24.39	17467000	4	P62258	P62258
RPS14	40S ribosomal protein S14	0.994456	0.323132	1	1	1	8.6	8.6	8.6	16.273	0	50.584	23285000	5	P62263	P62263
RPS4X;RPS4Y2	40S ribosomal protein S4, X isoform;40S ribosomal protein S4, Y isoform 2	0.694376	0.570785	1	1	1	2.7	2.7	2.7	29.597	0.0081967	5.9349	31155000	2	P62701;Q8TD47	P62701;Q8TD47
RPS6	40S ribosomal protein S6	1.5537	2.08408	1	1	1	3.2	3.2	3.2	28.68	0	7.1641	47791000	1	P62753	P62753
HIST1H4A	Histone H4	-2.25888	-2.05947	1	1	1	9.7	9.7	9.7	11.367	0	6.6856	2237200	1	P62805	P62805
RAN	GTP-binding nuclear protein Ran	0.436772	-0.00334406	1	1	1	5.1	5.1	5.1	24.423	0	13.846	23622000	2	P62826	P62826
RPS24	40S ribosomal protein S24	-2.41195	-1.2169	1	1	1	6	6	6	15.423	0	7.9581	4351200	2	P62847	P62847
RPS28	40S ribosomal protein S28	2.633	0.449569	3	3	3	36.2	36.2	36.2	7.8409	0	29.327	52341000	10	P62857	P62857
RPL32	60S ribosomal protein L32	-0.163913	0.00334406	1	1	1	5.2	5.2	5.2	15.86	0.0046083	6.1454	13099000	1	P62910	P62910
RPL11	60S ribosomal protein L11	-0.949315	-1.64504	1	1	1	3.9	3.9	3.9	20.252	0.0074627	5.8238	4115700	2	P62913	P62913
RPL8	60S ribosomal protein L8	-0.467152	-0.0327439	2	2	2	5.8	5.8	5.8	28.024	0	12.397	11750000	2	P62917	P62917
PPIA	Peptidyl-prolyl cis-trans isomerase A;Peptidyl-prolyl cis-trans isomerase A, N-terminally processed	0.0376081	-0.03929	1	1	1	6.1	6.1	6.1	18.012	0	9.9723	35095000	6	P62937	P62937
FKBP1A	Peptidyl-prolyl cis-trans isomerase FKBP1A	0.340217	-1.03729	1	1	1	12	12	12	11.951	0	74.911	28151000	3	P62942	P62942
TRA2B	Transformer-2 protein homolog beta	-1.16489	-1.66164	1	1	1	3.5	3.5	3.5	33.665	0	6.6365	8476300	1	P62995	P62995
YWHAZ	14-3-3 protein zeta/delta	0.951788	1.59632	2	2	2	15.1	15.1	15.1	27.745	0	105.95	46187000	7	P63104	P63104
EEF1A1;EEF1A1P5;EEF1A2	Elongation factor 1-alpha 1;Putative elongation factor 1-alpha-like 3;Elongation factor 1-alpha 2	1.51594	1.15324	2	2	2	3.2	3.2	3.2	50.14	0	22.168	9388700	2	P68104;Q5VTE0;Q05639	P68104;Q5VTE0;Q05639
TUBA1B;TUBA1C;TUBA1A;TUBA4A	Tubulin alpha-1B chain;Tubulin alpha-1C chain;Tubulin alpha-1A chain;Tubulin alpha-4A chain	4.26207	3.49956	4	4	4	11.5	11.5	11.5	50.151	0	323.31	1127600000	14	P68363;Q9BQE3;Q71U36;P68366;P0DPH8;P0DPH7;Q6PEY2;Q9NY65;A6NHL2	P68363;Q9BQE3;Q71U36;P68366;P0DPH8;P0DPH7
HIST1H3A;H3F3A;HIST2H3A;HIST3H3	Histone H3.1;Histone H3.3;Histone H3.2;Histone H3.1t	1.57716	0.923124	1	1	1	5.1	5.1	5.1	15.404	0	6.5536	5428300	1	P68431;P84243;Q71DI3;Q16695	P68431;P84243;Q71DI3;Q16695
CCT2	T-complex protein 1 subunit beta	0.36276	0.231586	3	3	3	9.2	9.2	9.2	57.488	0	34.626	55175000	3	P78371	P78371
DCD	Dermcidin;Survival-promoting peptide;DCD-1	0.705558	2.10785	2	2	2	16.4	16.4	16.4	11.284	0	18.096	17552000	3	P81605	P81605
RPL24	60S ribosomal protein L24	-0.296173	0.0967145	1	1	1	5.1	5.1	5.1	17.779	0.0077519	5.8645	7943700	1	P83731	P83731
RPL19	60S ribosomal protein L19	0.355262	0.0868001	1	1	1	4.6	4.6	4.6	23.466	0	6.8164	12950000	3	P84098	P84098
FAM3A	Protein FAM3A	0.0545797	1.88352	1	1	1	3.5	3.5	3.5	25.152	0.0046948	6.1687	35149000	1	P98173	P98173
HNRNPU	Heterogeneous nuclear ribonucleoprotein U	0.411193	0.676288	2	2	2	3.6	3.6	3.6	90.583	0	37.709	23746000	2	Q00839	Q00839
FABP5	Fatty acid-binding protein, epidermal	-4.11816	-3.53887	1	1	1	6.7	6.7	6.7	15.164	0	19.507	6733100	2	Q01469	Q01469
PFKP	ATP-dependent 6-phosphofructokinase, platelet type	0.862231	2.06024	1	1	1	0.9	0.9	0.9	85.595	0.0047847	6.2088	17949000	1	Q01813	Q01813
RPL6	60S ribosomal protein L6	-0.510541	-0.744659	1	1	1	2.4	2.4	2.4	32.728	0.0072202	5.7847	5548300	1	Q02878	Q02878
YWHAH	14-3-3 protein eta	-2.62742	-1.55571	2	2	2	11.4	11.4	11.4	28.218	0	13.463	12281000	2	Q04917	Q04917
PRDX1;PRDX4	Peroxiredoxin-1;Peroxiredoxin-4	3.16191	3.3236	2	2	2	7.5	7.5	7.5	22.11	0	12.725	111240000	8	Q06830;Q13162	Q06830;Q13162
SRSF1	Serine/arginine-rich splicing factor 1	-0.755438	-1.16707	1	1	1	3.6	3.6	3.6	27.744	0.0074349	5.8187	4229600	1	Q07955	Q07955
DHX9	ATP-dependent RNA helicase A	-2.92266	-3.63022	2	2	2	2.7	2.7	2.7	140.96	0	25.047	16312000	4	Q08211	Q08211
DSC1	Desmocollin-1	-0.852417	0.551466	2	2	2	3.2	3.2	3.2	99.986	0	59.03	20323000	3	Q08554	Q08554
LAMTOR4	Ragulator complex protein LAMTOR4;Ragulator complex protein LAMTOR4, N-terminally processed	-4.72865	-2.95258	1	1	1	10.1	10.1	10.1	10.741	0.0078125	5.8711	1033200	1	Q0VGL1	Q0VGL1
TARDBP	TAR DNA-binding protein 43	-1.36744	-1.82613	1	1	1	1.9	1.9	1.9	44.739	0	6.3001	7284900	1	Q13148	Q13148
HNRNPA0	Heterogeneous nuclear ribonucleoprotein A0	-0.43369	-1.9908	1	1	1	4.3	4.3	4.3	30.84	0.0075758	5.8443	5266700	1	Q13151	Q13151
MAD2L1	Mitotic spindle assembly checkpoint protein MAD2A	-0.247441	-1.43361	1	1	1	3.4	3.4	3.4	23.51	0.0085106	5.9953	10477000	1	Q13257	Q13257
EIF3I	Eukaryotic translation initiation factor 3 subunit I	-0.00237179	0.1043	1	1	1	3.7	3.7	3.7	36.501	0	13.786	8782000	2	Q13347	Q13347
DYNC1I2	Cytoplasmic dynein 1 intermediate chain 2	-3.40462	-3.15888	1	1	1	3.3	3.3	3.3	71.456	0	16.789	4435700	1	Q13409	Q13409
EIF3A	Eukaryotic translation initiation factor 3 subunit A	1.24418	0.149542	1	1	1	0.5	0.5	0.5	166.57	0.007874	5.8885	11803000	1	Q14152	Q14152
RBM39	RNA-binding protein 39	-3.35749	-1.86719	1	1	1	3.2	3.2	3.2	59.379	0	15.595	1527800	2	Q14498	Q14498
LBR	Lamin-B receptor	-1.43626	-1.04511	1	1	1	1.6	1.6	1.6	70.702	0	6.6154	3547100	1	Q14739	Q14739
KPNB1	Importin subunit beta-1	-2.09919	-1.32143	2	2	1	2.9	2.9	1.8	97.169	0	23.669	9928800	1	Q14974	Q14974
EIF4H	Eukaryotic translation initiation factor 4H	-0.873481	0.845262	1	1	1	5.6	5.6	5.6	27.385	0	14.726	19223000	1	Q15056	Q15056
PDIA6	Protein disulfide-isomerase A6	-0.196035	-0.59583	1	1	1	2.5	2.5	2.5	48.121	0	14.193	7299800	2	Q15084	Q15084
PTGES3	Prostaglandin E synthase 3	0.0917492	0.294229	1	1	1	4.4	4.4	4.4	18.697	0	7.0854	4700500	1	Q15185	Q15185
NONO;SFPQ	Non-POU domain-containing octamer-binding protein;Splicing factor, proline- and glutamine-rich	0.246005	-0.836818	2	2	2	3.2	3.2	3.2	54.231	0	12.679	15797000	2	Q15233;P23246	Q15233;P23246
PCBP1;PCBP3	Poly(rC)-binding protein 1;Poly(rC)-binding protein 3	0.474311	0.238367	3	3	1	11.8	11.8	3.1	37.497	0	46.982	47090000	5	Q15365;P57721	Q15365;P57721
PCBP2	Poly(rC)-binding protein 2	-1.60866	-2.13411	3	1	1	11.5	3	3	38.58	0	6.7931	6118400	1	Q15366	Q15366
TOMM20	Mitochondrial import receptor subunit TOM20 homolog	-2.16475	-1.36243	1	1	1	9	9	9	16.298	0	15.089	5717700	3	Q15388	Q15388
CNN3	Calponin-3	-3.99902	-4.35475	1	1	1	3.3	3.3	3.3	36.413	0	6.4296	1610000	1	Q15417	Q15417
DDB1	DNA damage-binding protein 1	-4.69439	-3.49982	1	1	1	0.7	0.7	0.7	126.97	0.008	5.9067	1408500	1	Q16531	Q16531
FSCN1	Fascin	-1.34979	-0.757066	1	1	1	1.6	1.6	1.6	54.529	0.0072464	5.7854	2806100	1	Q16658	Q16658
IMMT	MICOS complex subunit MIC60	-0.660375	-0.442323	1	1	1	1.3	1.3	1.3	83.677	0	6.7525	2710300	1	Q16891	Q16891
KIAA1109	Uncharacterized protein KIAA1109	0.402053	2.68792	1	1	1	0.3	0.3	0.3	555.48	0.0078431	5.8747	191010000	1	Q2LD37	Q2LD37
ERN2	Serine/threonine-protein kinase/endoribonuclease IRE2;Serine/threonine-protein kinase;Endoribonuclease	-5.45194	-2.54666	1	1	1	1.1	1.1	1.1	102.48	0.0082988	5.9586	6532300	1	Q76MJ5	Q76MJ5
TXNDC5	Thioredoxin domain-containing protein 5	-1.67453	-1.97284	1	1	1	2.3	2.3	2.3	47.628	0.0075472	5.8415	4261900	1	Q8NBS9	Q8NBS9
SERBP1	Plasminogen activator inhibitor 1 RNA-binding protein	-2.78226	-3.552	1	1	1	4.4	4.4	4.4	44.965	0	21.113	7477300	3	Q8NC51	Q8NC51
SYNE1	Nesprin-1	-0.13188	1.32935	1	1	1	0.2	0.2	0.2	1011.1	0.0083333	5.9599	15830000	1	Q8NF91	Q8NF91
ANGPTL6	Angiopoietin-related protein 6	3.00229	4.87244	1	1	1	1.5	1.5	1.5	51.694	0	6.6843	740540000	6	Q8NI99	Q8NI99
RAB37	Ras-related protein Rab-37	0.545173	-1.15174	1	1	1	4.9	4.9	4.9	24.815	0	7.4294	89751000	4	Q96AX2	Q96AX2
SGTB	Small glutamine-rich tetratricopeptide repeat-containing protein beta	-3.06229	-3.01247	1	1	1	3.3	3.3	3.3	33.429	0	6.3948	1318300	1	Q96EQ0	Q96EQ0
HMCN1	Hemicentin-1	3.82915	4.43483	1	1	1	0.1	0.1	0.1	613.38	0	23.41	227970000	8	Q96RW7	Q96RW7
TBCB	Tubulin-folding cofactor B	-0.281086	-0.174803	2	2	2	11.1	11.1	11.1	27.325	0	12.589	10525000	2	Q99426	Q99426
HNRNPAB	Heterogeneous nuclear ribonucleoprotein A/B	0.655699	-0.0568929	1	1	1	2.1	2.1	2.1	36.224	0.0045249	6.0992	4792200	1	Q99729	Q99729
DPYSL5	Dihydropyrimidinase-related protein 5	3.80593	3.9528	1	1	1	1.2	1.2	1.2	61.421	0	240.51	648320000	5	Q9BPU6	Q9BPU6
C19orf43	Uncharacterized protein C19orf43	0.0413923	-0.472906	1	1	1	8	8	8	18.419	0	50.069	15371000	1	Q9BQ61	Q9BQ61
RAB1B	Ras-related protein Rab-1B	-2.15178	-1.69804	1	1	1	5	5	5	22.171	0	6.9961	2462600	2	Q9H0U4	Q9H0U4
BCL11A	B-cell lymphoma/leukemia 11A	3.5995	5.102	1	1	1	1.9	1.9	1.9	91.196	0	11.56	738700000	4	Q9H165	Q9H165
SPTBN4	Spectrin beta chain, non-erythrocytic 4	-0.134904	0.652695	1	1	1	0.3	0.3	0.3	288.98	0.0087336	6.0469	6183900	1	Q9H254	Q9H254
CPVL	Probable serine carboxypeptidase CPVL	-2.9638	0.48568	1	1	1	2.1	2.1	2.1	54.163	0.0086957	6.035	2572400	1	Q9H3G5	Q9H3G5
BOLA2	BolA-like protein 2	-5.11223	-3.27063	1	1	1	10.5	10.5	10.5	10.116	0	7.911	3102000	2	Q9H3K6	Q9H3K6
RTN4	Reticulon-4	-1.73819	-1.05467	1	1	1	0.7	0.7	0.7	129.93	0	6.2717	2748100	1	Q9NQC3	Q9NQC3
UBA2	SUMO-activating enzyme subunit 2	0.67911	-0.613282	1	1	1	1.1	1.1	1.1	71.223	0.007326	5.7939	4161300	1	Q9UBT2	Q9UBT2
ZBTB47	Zinc finger and BTB domain-containing protein 47	3.13893	4.87767	1	1	1	2	2	2	82.759	0	8.099	233730000	3	Q9UFB7	Q9UFB7
PFDN2	Prefoldin subunit 2	-0.136828	-0.778679	1	1	1	5.8	5.8	5.8	16.648	0.0082305	5.9352	4257200	1	Q9UHV9	Q9UHV9
RAB21	Ras-related protein Rab-21	-2.524	-1.97329	1	1	1	6.7	6.7	6.7	24.347	0	29.237	1843300	1	Q9UL25	Q9UL25
ZNF215	Zinc finger protein 215	5.96455	7.6722	1	1	1	2.9	2.9	2.9	60.034	0	16.189	16602000000	23	Q9UL58	Q9UL58
INTU	Protein inturned	0.663275	1.89926	1	1	1	0.8	0.8	0.8	105.65	0.0079051	5.8998	21195000	1	Q9ULD6	Q9ULD6
PA2G4	Proliferation-associated protein 2G4	1.08387	0.42419	2	2	1	6.9	6.9	2	43.786	0	10.525	14760000	1	Q9UQ80	Q9UQ80
RUVBL2	RuvB-like 2	-2.5197	-2.10097	1	1	1	2.4	2.4	2.4	51.156	0	6.8249	2565300	1	Q9Y230	Q9Y230
NUDC	Nuclear migration protein nudC	0.596868	0.804718	1	1	1	2.7	2.7	2.7	38.242	0	7.9796	12271000	2	Q9Y266	Q9Y266
CFL2	Cofilin-2	-2.0099	-2.14127	1	1	1	7.2	7.2	7.2	18.736	0	7.7438	2488200	1	Q9Y281	Q9Y281
RPL36	60S ribosomal protein L36	-0.424053	-0.982484	2	2	2	10.5	10.5	10.5	12.254	0	14.996	11128000	3	Q9Y3U8	Q9Y3U8
RBM8A	RNA-binding protein 8A	0.509051	0.205918	1	1	1	5.2	5.2	5.2	19.889	0	6.8475	8455300	2	Q9Y5S9	Q9Y5S9

## Sheet: Fig. 4C data
Identified proteins in profile plot Fig. 4C (6Yn-Pro+H2O2 vs DMSO+H2O2 control)
Gene names	Protein names	DMSO+H2O2 (Log2 intensity)	6Yn-Pro+H2O2 (Log2 intensity)	Peptides	Razor + unique peptides	Unique peptides	Sequence coverage [%]	Unique + razor sequence coverage [%]	Unique sequence coverage [%]	Mol. weight [kDa]	Q-value	Score	Intensity	MS/MS count	Protein IDs	Majority protein IDs
NPEPPS;NPEPPSL1	Puromycin-sensitive aminopeptidase;Puromycin-sensitive aminopeptidase-like protein	-1.22355	-1.1482	1	1	1	1.2	1.2	1.2	103.28	0.0023095	6.3368	9234100	1	P55786;A6NEC2	P55786;A6NEC2
OR2AG2;OR2AG1	Olfactory receptor 2AG2;Olfactory receptor 2AG1	-2.65617	-3.32041	1	1	1	2.5	2.5	2.5	35.27	1	-2	6885400	1	A6NM03;Q9H205	A6NM03;Q9H205
RNF225	RING finger protein 225	-0.974582	-1.31055	1	1	1	3	3	3	34.788	1	-2	58746000	1	M0QZC1	M0QZC1
AIP	AH receptor-interacting protein	-2.17579	-2.27582	2	2	2	7.6	7.6	7.6	37.636	0	12.34	15466000	2	O00170	O00170
PSMD11	26S proteasome non-ATPase regulatory subunit 11	0.339779	0.508992	2	2	2	4	4	4	47.463	0	12.833	17312000	2	O00231	O00231
CLIC1	Chloride intracellular channel protein 1	-0.612465	-0.299449	5	5	5	28.2	28.2	28.2	26.922	0	36.945	48597000	10	O00299	O00299
EIF3F	Eukaryotic translation initiation factor 3 subunit F	-1.50153	-1.55783	1	1	1	4.8	4.8	4.8	37.563	0	17.86	39746000	1	O00303	O00303
DDX3X;DDX3Y	ATP-dependent RNA helicase DDX3X;ATP-dependent RNA helicase DDX3Y	0.165429	0.0057888	3	3	3	6.3	6.3	6.3	73.243	0	68.624	39953000	5	O00571;O15523	O00571;O15523
EIF1AX;EIF1AY	Eukaryotic translation initiation factor 1A, X-chromosomal;Eukaryotic translation initiation factor 1A, Y-chromosomal	-0.49667	-0.874957	2	2	2	11.8	11.8	11.8	16.46	0	12.337	27926000	4	P47813;O14602	P47813;O14602
PSMA7;PSMA8	Proteasome subunit alpha type-7;Proteasome subunit alpha type-7-like	-0.480095	-0.742464	3	3	3	13.3	13.3	13.3	27.887	0	23.409	259230000	8	O14818;Q8TAA3	O14818;Q8TAA3
MYL12B;MYL12A	Myosin regulatory light chain 12B;Myosin regulatory light chain 12A	-0.189554	0.448043	1	1	1	5.8	5.8	5.8	19.779	0	63.798	100840000	5	O14950;P19105	O14950;P19105
HNRNPDL;SHROOM4	Heterogeneous nuclear ribonucleoprotein D-like;Protein Shroom4	0.19304	0.343036	2	2	2	3.6	3.6	3.6	46.437	0	84.056	137640000	5	O14979;Q9ULL8;REV__Q8N0S2;REV__Q9ULL8	O14979;Q9ULL8;REV__Q8N0S2;REV__Q9ULL8
SPTBN2	Spectrin beta chain, non-erythrocytic 2	0.0863533	0.331466	1	1	1	0.3	0.3	0.3	271.32	0.0044346	6.1926	1160000000	5	O15020	O15020
STX7	Syntaxin-7	-4.83444	-4.49697	1	1	1	6.1	6.1	6.1	29.815	0.0044053	6.1794	5905200	1	O15400	O15400
PHGDH	D-3-phosphoglycerate dehydrogenase	0.972694	1.07356	6	6	6	15.2	15.2	15.2	56.65	0	48.492	170830000	13	O43175	O43175
HNRNPR;SYNCRIP	Heterogeneous nuclear ribonucleoprotein R;Heterogeneous nuclear ribonucleoprotein Q	-1.87669	-1.98333	2	2	2	3.6	3.6	3.6	70.942	0	13.672	7972000	2	O43390;O60506	O43390;O60506
PRPSAP1;PRPSAP2	Phosphoribosyl pyrophosphate synthase-associated protein 1;Phosphoribosyl pyrophosphate synthase-associated protein 2	-1.91937	-2.14431	1	1	1	3.9	3.9	3.9	39.393	0	6.6347	4187700	1	Q14558;O60256	Q14558;O60256
HIST1H2BH;HIST1H2BN;HIST1H2BC;HIST1H2BD;HIST1H2BK;HIST2H2BF;HIST1H2BM;H2BFS	Histone H2B type 1-H;Histone H2B type 1-N;Histone H2B type 1-C/E/F/G/I;Histone H2B type 1-D;Histone H2B type 1-K;Histone H2B type 2-F;Histone H2B type 1-M;Histone H2B type F-S	2.18665	2.35394	9	1	0	55.6	5.6	0	13.892	0	10.28	1186700000	8	Q93079;Q99877;P62807;P58876;O60814;Q5QNW6;Q99879;P57053	Q93079;Q99877;P62807;P58876;O60814;Q5QNW6;Q99879;P57053
DENND4B	DENN domain-containing protein 4B	-0.887655	-1.36301	1	1	1	0.5	0.5	0.5	163.84	1	-2	21957000	2	O75064	O75064
TBCA	Tubulin-specific chaperone A	-1.59699	-1.52297	1	1	1	10.2	10.2	10.2	12.855	0.0022831	6.2861	23181000	5	O75347	O75347
CS	Citrate synthase, mitochondrial	-0.246479	-0.406845	5	5	5	11.8	11.8	11.8	51.712	0	42.615	44233000	10	O75390	O75390
CSDE1	Cold shock domain-containing protein E1	-0.555048	-0.580615	1	1	1	1.1	1.1	1.1	88.884	0	6.8823	107200000	2	O75534	O75534
ATP5H	ATP synthase subunit d, mitochondrial	2.63752	2.76841	4	4	4	26.1	26.1	26.1	18.491	0	142.29	434680000	12	O75947	O75947
DDAH1	N(G),N(G)-dimethylarginine dimethylaminohydrolase 1	-1.57988	-2.14295	1	1	1	4.2	4.2	4.2	31.121	0	6.5677	7387200	3	O94760	O94760
PGLS	6-phosphogluconolactonase	-3.80887	-3.61526	1	1	1	6.2	6.2	6.2	27.547	0.0023923	6.4226	5284100	2	O95336	O95336
UTS2	Urotensin-2	-1.58651	-0.690787	1	1	1	6.5	6.5	6.5	14.295	0	38.899	219020000	9	O95399	O95399
AHSA1	Activator of 90 kDa heat shock protein ATPase homolog 1	-3.0757	-3.47945	1	1	1	4.1	4.1	4.1	38.274	0	7.4142	6612200	1	O95433	O95433
AIFM1	Apoptosis-inducing factor 1, mitochondrial	-2.35479	-2.37274	1	1	1	2.6	2.6	2.6	66.9	0.0023753	6.402	9737900	1	O95831	O95831
LDHA	L-lactate dehydrogenase A chain	3.24225	3.10272	10	10	9	26.8	26.8	23.2	36.688	0	323.31	505000000	31	P00338;P07864;Q6ZMR3	P00338
PGK1	Phosphoglycerate kinase 1	4.00907	4.32554	16	16	16	42.4	42.4	42.4	44.614	0	323.31	2548000000	56	P00558;P07205	P00558
PLAU	Urokinase-type plasminogen activator;Urokinase-type plasminogen activator long chain A;Urokinase-type plasminogen activator short chain A;Urokinase-type plasminogen activator chain B	4.46176	3.83157	1	1	1	2.3	2.3	2.3	48.507	0.0022422	6.2337	12497000000	11	P00749	P00749
LMNA;LMNB1;LMNB2	Prelamin-A/C;Lamin-A/C;Lamin-B1;Lamin-B2	-4.69918	-3.88885	2	2	2	2.7	2.7	2.7	74.139	0	12.687	29163000	3	P02545;P20700;Q03252	P02545;P20700;Q03252
APOC3	Apolipoprotein C-III	-0.547771	-0.502056	1	1	1	16.2	16.2	16.2	10.852	0	105.56	209840000	11	P02656	P02656
ALDOA	Fructose-bisphosphate aldolase A	4.61612	4.55551	16	16	15	46.2	46.2	44.2	39.42	0	180.9	1603400000	57	P04075;P05062	P04075
CSTB	Cystatin-B	-0.610193	-2.39256	1	1	1	12.2	12.2	12.2	11.139	0	7.8124	12451000	4	P04080	P04080
OAT	Ornithine aminotransferase, mitochondrial;Ornithine aminotransferase, hepatic form;Ornithine aminotransferase, renal form	-2.98113	-2.75259	2	2	2	5.9	5.9	5.9	48.534	0	12.433	6770900	3	P04181	P04181
GAPDH	Glyceraldehyde-3-phosphate dehydrogenase	4.96844	4.90036	13	13	13	46.6	46.6	46.6	36.053	0	242.11	4131300000	91	P04406	P04406
ATP1A1;ATP1A3	Sodium/potassium-transporting ATPase subunit alpha-1;Sodium/potassium-transporting ATPase subunit alpha-3	-5.73652	-5.21374	1	1	1	1.1	1.1	1.1	112.89	0	6.733	3271900	2	P05023;P13637	P05023;P13637
S100A8	Protein S100-A8;Protein S100-A8, N-terminally processed	-3.00744	-3.50125	3	3	3	32.3	32.3	32.3	10.834	0	18.929	49541000	5	P05109	P05109
SLC25A5;SLC25A4	ADP/ATP translocase 2;ADP/ATP translocase 2, N-terminally processed;ADP/ATP translocase 1	3.54918	3.59589	10	10	3	30.5	30.5	11.1	32.852	0	64.81	664480000	32	P05141;P12235;Q9H0C2	P05141;P12235
PCCA	Propionyl-CoA carboxylase alpha chain, mitochondrial	-2.32533	-2.00299	1	1	1	1.9	1.9	1.9	80.058	0	7.5266	34322000	4	P05165	P05165
EIF2S1	Eukaryotic translation initiation factor 2 subunit 1	-2.49245	-2.26321	1	1	1	3.8	3.8	3.8	36.112	0	6.5656	13679000	3	P05198	P05198
RPLP0;RPLP0P6	60S acidic ribosomal protein P0;60S acidic ribosomal protein P0-like	-1.19724	-1.2122	4	4	4	21.1	21.1	21.1	34.273	0	28.948	26403000	4	P05388;Q8NHW5	P05388;Q8NHW5
SSB	Lupus La protein	-3.70659	-3.80851	2	2	2	4.7	4.7	4.7	46.836	0	12.486	31081000	2	P05455	P05455
ATP5G1;ATP5G3;ATP5G2	ATP synthase F(0) complex subunit C1, mitochondrial;ATP synthase F(0) complex subunit C3, mitochondrial;ATP synthase F(0) complex subunit C2, mitochondrial	1.11031	0.444543	1	1	1	5.1	5.1	5.1	14.277	0.0042463	6.1199	47327000	4	P05496;P48201;Q06055	P05496;P48201;Q06055
S100A9	Protein S100-A9	-1.30031	-1.96928	1	1	1	11.4	11.4	11.4	13.242	0	8.883	18552000	4	P06702	P06702
ENO1	Alpha-enolase	0.957822	1.03406	5	5	5	15.9	15.9	15.9	47.168	0	56.248	284940000	13	P06733;P13929;P09104	P06733
GPI	Glucose-6-phosphate isomerase	1.90702	1.57549	6	6	5	10.9	10.9	9	63.146	0	34.739	50090000	8	P06744	P06744
NPM1	Nucleophosmin	2.72472	2.82791	7	7	7	21.1	21.1	21.1	32.575	0	47.498	654740000	13	P06748	P06748
HIST1H2BB;HIST2H2BE;HIST1H2BO;HIST1H2BJ	Histone H2B type 1-B;Histone H2B type 2-E;Histone H2B type 1-O;Histone H2B type 1-J	0.405345	0.568716	9	2	0	55.6	7.9	0	13.95	0	12.865	25256000	11	P33778;Q16778;P23527;P06899;Q6DRA6;Q6DN03	P33778;Q16778;P23527;P06899
LDHB	L-lactate dehydrogenase B chain	4.2232	3.97505	8	7	7	27.2	23.7	23.7	36.638	0	98.262	493090000	35	P07195	P07195
P4HB	Protein disulfide-isomerase	-0.049552	-0.0383692	4	4	4	9.1	9.1	9.1	57.116	0	27.391	37202000	4	P07237	P07237
H1F0	Histone H1.0;Histone H1.0, N-terminally processed	3.17863	2.82133	6	6	6	27.8	27.8	27.8	20.863	0	60.919	727280000	28	P07305	P07305
ANXA2;ANXA2P2	Annexin A2;Putative annexin A2-like protein	-5.66729	-6.05199	2	2	2	7.1	7.1	7.1	38.604	0	14.126	14423000	4	P07355;A6NMY6	P07355;A6NMY6
TUBB	Tubulin beta chain	2.73582	2.63657	13	3	2	30.6	9.5	6.1	49.67	0	31.838	2620200000	34	P07437;A6NNZ2;Q9H4B7;CON__ENSEMBL:ENSBTAP00000025008	P07437
PFN1	Profilin-1	3.48725	3.34851	8	8	8	57.9	57.9	57.9	15.054	0	59.937	332690000	42	P07737;CON__P02584	P07737
HSP90AA1	Heat shock protein HSP 90-alpha	3.30875	2.95611	14	10	10	20.2	13.7	13.7	84.659	0	68.22	267450000	30	P07900;Q58FG1	P07900
HNRNPC	Heterogeneous nuclear ribonucleoproteins C1/C2	4.60153	3.03573	11	11	10	29.4	29.4	28.1	33.67	0	75.853	1652200000	36	P07910;O60812;B7ZW38;B2RXH8;P0DMR1;A0A0G2JPF8;A0A0G2JNQ3;Q86SE5	P07910
PFKM	ATP-dependent 6-phosphofructokinase, muscle type	-3.39679	-3.35137	2	1	1	3.6	2.4	2.4	85.182	0.0042827	6.1325	5165300	1	P08237	P08237
HSP90AB1	Heat shock protein HSP 90-beta	4.53389	3.96405	15	15	10	22.7	22.7	14.1	83.263	0	323.31	5006800000	86	P08238;Q58FF8;Q58FF7;Q14568	P08238
SNRNP70	U1 small nuclear ribonucleoprotein 70 kDa	-4.87882	-4.1227	2	2	2	5.9	5.9	5.9	51.556	0	11.846	4218600	2	P08621	P08621
VIM	Vimentin	2.03442	2.60346	14	13	12	33.7	32.2	30.3	53.651	0	284.54	376730000	30	P08670;P41219;P17661	P08670
RPS17	40S ribosomal protein S17	1.5631	0.760194	2	2	2	16.3	16.3	16.3	15.55	0	14.681	72801000	5	P08708	P08708
GNAI3	Guanine nucleotide-binding protein G(k) subunit alpha	-4.29368	-3.71154	1	1	1	4.2	4.2	4.2	40.532	0.002445	6.4755	2882000	1	P08754	P08754
ANXA5	Annexin A5	-0.675419	-0.613569	8	8	8	25.6	25.6	25.6	35.936	0	55.288	231530000	16	P08758	P08758
RPSA	40S ribosomal protein SA	0.436654	0.262598	3	3	3	12.9	12.9	12.9	32.854	0	32.052	225110000	9	P08865	P08865
HMGB1;HMGB1P1	High mobility group protein B1;Putative high mobility group protein B1-like 1	1.68106	1.64341	5	5	5	20	20	20	24.893	0	31.58	69947000	8	P09429;B2RPK0;P26583	P09429;B2RPK0
CNP	2,3-cyclic-nucleotide 3-phosphodiesterase	-0.844986	-0.797557	1	1	1	2.4	2.4	2.4	47.578	0.0022472	6.2384	12225000	1	P09543	P09543
HNRNPA1;HNRNPA1L2	Heterogeneous nuclear ribonucleoprotein A1;Heterogeneous nuclear ribonucleoprotein A1, N-terminally processed;Heterogeneous nuclear ribonucleoprotein A1-like 2	3.19445	2.98379	6	6	5	19.1	19.1	17.2	38.746	0	323.31	823080000	24	P09651;Q32P51;A0A2R8Y4L2	P09651;Q32P51
PARP1	Poly [ADP-ribose] polymerase 1	2.29395	3.5908	15	15	14	14.5	14.5	13.6	113.08	0	99.352	408570000	27	P09874	P09874
UCHL1	Ubiquitin carboxyl-terminal hydrolase isozyme L1	0.806635	0.880651	4	4	4	17.9	17.9	17.9	24.824	0	24.646	50567000	7	P09936	P09936
ALDOC	Fructose-bisphosphate aldolase C	-6.51619	-6.18078	2	1	1	8.2	6.3	6.3	39.455	0	9.2101	14776000	2	P09972	P09972
HIST2H2AA3;HIST1H2AG;HIST1H2AJ;H2AFJ;HIST2H2AC;HIST1H2AH;HIST1H2AD;HIST1H2AC;HIST3H2A;HIST1H2AB;H2AFX;H2AFV;H2AFZ;HIST1H2AA	Histone H2A type 2-A;Histone H2A type 1;Histone H2A type 1-J;Histone H2A.J;Histone H2A type 2-C;Histone H2A type 1-H;Histone H2A type 1-D;Histone H2A type 1-C;Histone H2A type 3;Histone H2A type 1-B/E;Histone H2AX;Histone H2A.V;Histone H2A.Z;Histone H2A type 1-A	2.20731	2.28146	4	4	4	35.4	35.4	35.4	14.095	0	50.195	580170000	17	Q6FI13;P0C0S8;Q99878;Q9BTM1;Q16777;Q96KK5;P20671;Q93077;Q7L7L0;P04908;P16104;Q71UI9;P0C0S5;Q96QV6;Q8IUE6	Q6FI13;P0C0S8;Q99878;Q9BTM1;Q16777;Q96KK5;P20671;Q93077;Q7L7L0;P04908;P16104;Q71UI9;P0C0S5;Q96QV6
HSPA1A;HSPA1B;HSPA1L	Heat shock 70 kDa protein 1A;Heat shock 70 kDa protein 1B;Heat shock 70 kDa protein 1-like	5.85072	5.3655	20	19	10	35.3	34.2	21.5	70.051	0	323.31	8255500000	131	P0DMV8;P0DMV9;P34931	P0DMV8;P0DMV9;P34931
U2AF1	Splicing factor U2AF 35 kDa subunit	-0.350188	-0.278136	1	1	1	3.3	3.3	3.3	27.872	0.0043384	6.1465	30021000	2	Q01081;P0DN76	Q01081;P0DN76
HIST1H1E	Histone H1.4	8.23213	7.96741	25	25	8	58.9	58.9	21.5	21.865	0	323.31	60490000000	344	P10412	P10412
CTSA	Lysosomal protective protein;Lysosomal protective protein 32 kDa chain;Lysosomal protective protein 20 kDa chain	-3.05833	2.70322	1	1	1	1.5	1.5	1.5	54.465	0.0043478	6.1476	80570000	3	P10619	P10619
HSPD1	60 kDa heat shock protein, mitochondrial	3.73116	3.44669	15	15	15	28.6	28.6	28.6	61.054	0	270.66	1554500000	53	P10809	P10809
HSPA5	78 kDa glucose-regulated protein	3.5209	3.9848	22	22	21	36.9	36.9	35.8	72.332	0	323.31	7492900000	92	P11021	P11021
HSPA8	Heat shock cognate 71 kDa protein	3.86688	3.376	19	15	15	31.6	27.1	27.1	70.897	0	141.53	1150500000	45	P11142;P54652	P11142
MTHFD1	C-1-tetrahydrofolate synthase, cytoplasmic;Methylenetetrahydrofolate dehydrogenase;Methenyltetrahydrofolate cyclohydrolase;Formyltetrahydrofolate synthetase;C-1-tetrahydrofolate synthase, cytoplasmic, N-terminally processed	-1.39288	-1.23332	2	2	2	2.1	2.1	2.1	101.56	0	11.579	12569000	4	P11586	P11586
PABPC1	Polyadenylate-binding protein 1	0.38961	0.158925	3	3	3	5.7	5.7	5.7	70.67	0	17.896	31898000	6	P11940;Q13310;Q9H361	P11940
PCNA	Proliferating cell nuclear antigen	0.0848083	0.452772	3	3	3	15.3	15.3	15.3	28.768	0	34.503	51641000	4	P12004	P12004
SLC25A6	ADP/ATP translocase 3;ADP/ATP translocase 3, N-terminally processed	-0.660184	-0.650285	8	1	1	22.5	3	3	32.866	0.0024631	6.5002	27622000	6	P12236	P12236
CKB	Creatine kinase B-type	2.8223	3.41502	10	10	10	31.5	31.5	31.5	42.644	0	280.49	1744900000	51	P12277;P06732	P12277
XRCC5	X-ray repair cross-complementing protein 5	-0.861337	-0.937612	2	2	2	2.9	2.9	2.9	82.704	0	12.036	9919300	2	P13010	P13010
EEF2	Elongation factor 2	4.43218	4.16791	21	21	21	26.6	26.6	26.6	95.337	0	268.51	1331300000	60	P13639;Q15029	P13639
PLS3;LCP1	Plastin-3;Plastin-2	0.948872	0.466978	4	4	4	7.8	7.8	7.8	70.81	0	28.009	50928000	5	P13797;P13796;Q14651	P13797;P13796
MIF	Macrophage migration inhibitory factor	1.69498	4.23284	5	5	5	47.8	47.8	47.8	12.476	0	61.746	7194200000	29	P14174	P14174
PKM	Pyruvate kinase PKM	4.50479	4.33441	18	18	17	46.5	46.5	40.7	57.936	0	323.31	2704300000	67	P14618;P30613	P14618
HSP90B1	Endoplasmin	1.95393	2.07004	10	9	9	13.4	11.7	11.7	92.468	0	57.74	233080000	31	P14625;Q58FF3	P14625
HNRNPL	Heterogeneous nuclear ribonucleoprotein L	1.73049	1.61003	7	7	7	12.4	12.4	12.4	64.132	0	46.019	238180000	12	P14866;Q8WVV9	P14866
DARS	Aspartate--tRNA ligase, cytoplasmic	-4.21806	-3.76689	1	1	1	2	2	2	57.136	0.0022321	6.2263	4233100	1	P14868	P14868
RPS2	40S ribosomal protein S2	2.9547	2.59702	7	7	7	25.9	25.9	25.9	31.324	0	49.256	243000000	25	P15880	P15880
DSP	Desmoplakin	-2.74562	-3.13516	13	13	13	4.8	4.8	4.8	331.77	0	142.9	148140000	18	P15924	P15924
CBR1	Carbonyl reductase [NADPH] 1	-1.07814	-1.00364	5	5	5	24.5	24.5	24.5	30.375	0	59.664	96946000	8	P16152;O75828	P16152
PDGFRA	Platelet-derived growth factor receptor alpha	0.448372	-0.434046	1	1	1	0.8	0.8	0.8	122.67	0.0042644	6.1222	27594000	2	P16234	P16234
HIST1H1D	Histone H1.3	5.57581	5.08317	24	8	8	58.4	25.3	25.3	22.35	0	65.981	3718800000	41	P16402;REV__P16402	P16402
HIST1H1C	Histone H1.2	5.6436	5.16035	23	8	8	57.3	22.1	22.1	21.364	0	105.02	7130300000	73	P16403;Q02539;P16401;P22492	P16403
PCSK2	Neuroendocrine convertase 2	7.05159	6.44287	1	1	1	1.6	1.6	1.6	70.564	0.0042105	6.1097	58017000000	6	P16519	P16519
HSPA6;HSPA7	Heat shock 70 kDa protein 6;Putative heat shock 70 kDa protein 7	1.23672	1.19519	10	1	1	14.3	1.7	1.7	71.027	0	249.75	427000000	16	P17066;P48741	P17066;P48741
DDX5	Probable ATP-dependent RNA helicase DDX5	0.721639	0.397779	5	5	3	9.1	9.1	5.4	69.147	0	32.065	219220000	10	P17844	P17844
PFKL	ATP-dependent 6-phosphofructokinase, liver type	1.50908	2.17066	12	11	10	19.9	17.4	16.3	85.018	0	117.61	590350000	26	P17858	P17858
PSMC3	26S protease regulatory subunit 6A	0.289124	0.291924	1	1	1	1.6	1.6	1.6	49.203	0.0083682	6.0888	31218000	2	P17980	P17980
TCP1	T-complex protein 1 subunit alpha	1.49548	1.39702	10	10	10	19.4	19.4	19.4	60.343	0	65.563	212190000	23	P17987	P17987
RPL35A	60S ribosomal protein L35a	1.32761	0.949189	4	4	4	32.7	32.7	32.7	12.538	0	23.681	65323000	6	P18077	P18077
RPL7	60S ribosomal protein L7	1.84824	1.69858	6	6	6	28.6	28.6	28.6	29.225	0	151.95	518160000	12	P18124	P18124
RPL17	60S ribosomal protein L17	-0.762164	-1.08081	2	2	2	8.7	8.7	8.7	21.397	0	12.088	10970000	3	P18621	P18621
NCL	Nucleolin	3.47129	2.88626	8	8	8	8.2	8.2	8.2	76.613	0	54.099	324770000	14	P19338	P19338
RAB6A;RAB6B;RAB39A	Ras-related protein Rab-6A;Ras-related protein Rab-6B;Ras-related protein Rab-39A	-1.35135	-1.28416	1	1	1	5.3	5.3	5.3	23.593	0.0022936	6.3078	43970000	3	P20340;Q9NRW1;Q14964	P20340;Q9NRW1;Q14964
PSMB1	Proteasome subunit beta type-1	-2.73544	-2.22985	1	1	1	4.1	4.1	4.1	26.489	0.0044248	6.1923	14040000	2	P20618	P20618
PRPS1;PRPS1L1	Ribose-phosphate pyrophosphokinase 1;Ribose-phosphate pyrophosphokinase 3	-2.47424	-2.36076	1	1	1	4.1	4.1	4.1	34.834	0.002457	6.4989	5751200	1	P60891;P21108	P60891;P21108
FLNA	Filamin-A	2.56506	2.45496	21	21	21	11.4	11.4	11.4	280.74	0	201.49	357200000	45	P21333	P21333
VDAC1	Voltage-dependent anion-selective channel protein 1	1.079	0.783531	5	5	5	20.1	20.1	20.1	30.772	0	31.101	49513000	7	P21796	P21796
SDHB	Succinate dehydrogenase [ubiquinone] iron-sulfur subunit, mitochondrial	-4.44163	-3.51885	1	1	1	5	5	5	31.629	0.0044444	6.1926	13304000	1	P21912	P21912
GART	Trifunctional purine biosynthetic protein adenosine-3;Phosphoribosylamine--glycine ligase;Phosphoribosylformylglycinamidine cyclo-ligase;Phosphoribosylglycinamide formyltransferase	-1.63522	-1.91484	2	2	2	4.5	4.5	4.5	107.77	0	20.994	13838000	2	P22102	P22102
UBA1	Ubiquitin-like modifier-activating enzyme 1	1.5738	1.41922	9	9	9	10.1	10.1	10.1	117.85	0	68.195	569590000	20	P22314	P22314
NME2;NME1;NME2P1	Nucleoside diphosphate kinase B;Nucleoside diphosphate kinase A;Putative nucleoside diphosphate kinase	2.91654	2.69145	8	8	8	46.7	46.7	46.7	17.298	0	64.929	478270000	25	P22392;P15531;O60361	P22392;P15531;O60361
HNRNPA2B1	Heterogeneous nuclear ribonucleoproteins A2/B1	3.32567	3.56321	14	14	14	52.7	52.7	52.7	37.429	0	323.31	1594200000	45	P22626	P22626
UQCRC2	Cytochrome b-c1 complex subunit 2, mitochondrial	-1.80669	-1.70041	1	1	1	1.8	1.8	1.8	48.442	0.0023585	6.389	6255000	2	P22695	P22695
SFPQ	Splicing factor, proline- and glutamine-rich	-1.26696	-1.72212	4	3	3	5.4	4.2	4.2	76.149	0	17.869	17826000	3	P23246	P23246
PPIB	Peptidyl-prolyl cis-trans isomerase B	-1.25096	-1.07607	2	2	2	12	12	12	23.742	0	26.344	77814000	5	P23284	P23284
RPS3	40S ribosomal protein S3	1.44854	1.15299	7	7	7	30.5	30.5	30.5	26.688	0	47.449	190510000	10	P23396	P23396
AHCY	Adenosylhomocysteinase	1.60727	1.70544	6	6	6	14.1	14.1	14.1	47.716	0	48.855	173770000	14	P23526	P23526
CFL1	Cofilin-1	1.71416	1.14758	4	4	4	28.3	28.3	28.3	18.502	0	27.814	190460000	12	P23528;Q9Y281	P23528
EEF1B2	Elongation factor 1-beta	0.519855	0.209831	4	4	4	16.9	16.9	16.9	24.763	0	26.374	24923000	4	P24534	P24534
ATP5F1	ATP synthase F(0) complex subunit B1, mitochondrial	-2.1313	-2.04847	1	1	1	3.1	3.1	3.1	28.908	0.0022573	6.2431	6296400	1	P24539	P24539
RPS12	40S ribosomal protein S12	-0.793138	-0.611664	2	2	2	18.2	18.2	18.2	14.515	0	19.041	83980000	2	P25398	P25398
ATP5A1	ATP synthase subunit alpha, mitochondrial	1.10536	0.694593	7	7	7	17	17	17	59.75	0	68.597	241920000	14	P25705	P25705
PSMA2	Proteasome subunit alpha type-2	-3.71953	-4.11689	1	1	1	6	6	6	25.898	0.0023641	6.3898	3870400	1	P25787	P25787
PSMA3	Proteasome subunit alpha type-3	0.382711	0.306055	4	4	4	19.6	19.6	19.6	28.433	0	42.657	32486000	6	P25788	P25788
MSN;EZR;RDX	Moesin;Ezrin;Radixin	-0.734645	-0.815235	3	3	3	5.9	5.9	5.9	67.819	0	18.589	32321000	3	P26038;P15311;P35241	P26038;P15311;P35241
RPL13	60S ribosomal protein L13	1.91105	1.5824	5	5	5	25.1	25.1	25.1	24.261	0	34.025	253590000	14	P26373	P26373
PTBP1	Polypyrimidine tract-binding protein 1	-1.39497	-0.911504	6	6	4	13.6	13.6	10.9	57.221	0	46.474	68050000	8	P26599;O95758	P26599
TARS;TARSL2	Threonine--tRNA ligase, cytoplasmic;Probable threonine--tRNA ligase 2, cytoplasmic	-0.957678	-1.01752	2	2	2	3	3	3	83.434	0	13.513	27568000	4	P26639;A2RTX5	P26639;A2RTX5
VARS	Valine--tRNA ligase	-3.48607	-3.03744	3	3	3	3.3	3.3	3.3	140.47	0	17.829	11520000	4	P26640	P26640
EEF1G	Elongation factor 1-gamma	2.11164	1.9687	6	6	6	15.1	15.1	15.1	50.118	0	84.52	254220000	27	P26641	P26641
YWHAQ	14-3-3 protein theta	-3.3091	-3.69886	6	3	2	28.6	18.8	15.1	27.764	0	81.004	50923000	5	P27348	P27348
RPA1	Replication protein A 70 kDa DNA-binding subunit;Replication protein A 70 kDa DNA-binding subunit, N-terminally processed	-3.66565	-3.41157	1	1	1	2.6	2.6	2.6	68.137	0.0024331	6.4557	3913900	1	P27694	P27694
CALR	Calreticulin	0.268663	0.361475	4	4	4	8.9	8.9	8.9	48.141	0	86.859	65955000	6	P27797	P27797
CANX	Calnexin	-1.26834	-1.48191	1	1	1	2.5	2.5	2.5	67.567	0	8.29	21241000	2	P27824	P27824
PSMA5	Proteasome subunit alpha type-5	0.353774	0.422557	2	2	2	9.5	9.5	9.5	26.411	0	21.587	122730000	5	P28066	P28066
PSMB5	Proteasome subunit beta type-5	0.372256	-0.0516558	6	6	6	27.8	27.8	27.8	28.48	0	39.992	47808000	10	P28074	P28074
TKT	Transketolase	1.1202	0.918343	7	7	7	12.8	12.8	12.8	67.877	0	62.14	349270000	13	P29401	P29401
EEF1D	Elongation factor 1-delta	-2.04846	-1.39579	3	3	2	14.9	14.9	11.7	31.121	0	56.052	19947000	3	P29692	P29692
ERP29	Endoplasmic reticulum resident protein 29	-4.41898	-4.38254	1	1	1	4.6	4.6	4.6	28.993	0.0022523	6.2408	3005900	2	P30040	P30040
PRDX5	Peroxiredoxin-5, mitochondrial	-4.36307	-4.45766	1	1	1	7.5	7.5	7.5	22.086	0.0024272	6.4545	1762200	1	P30044	P30044
PRDX3	Thioredoxin-dependent peroxide reductase, mitochondrial	-4.0904	-3.44924	3	3	3	14.5	14.5	14.5	27.692	0	100.36	4986800	3	P30048	P30048
RPL12	60S ribosomal protein L12	2.32894	2.1351	5	5	5	33.9	33.9	33.9	17.818	0	40.781	271390000	9	P30050	P30050
PDIA3	Protein disulfide-isomerase A3	0.836646	0.835153	7	7	7	16.8	16.8	16.8	56.782	0	44.084	74451000	12	P30101	P30101
PPP2R1A	Serine/threonine-protein phosphatase 2A 65 kDa regulatory subunit A alpha isoform	-3.0866	-2.76686	1	1	1	2.2	2.2	2.2	65.308	0.0022989	6.3172	11126000	2	P30153	P30153
NMT1	Glycylpeptide N-tetradecanoyltransferase 1	-3.02544	-2.47176	2	2	2	4.8	4.8	4.8	56.806	0	12.603	4363800	4	P30419	P30419
SRI	Sorcin	-4.29194	-3.66367	1	1	1	5.6	5.6	5.6	21.676	0.0022371	6.2279	1420000	1	P30626	P30626
S100A7A;S100A7	Protein S100-A7A;Protein S100-A7	-1.98715	-2.55142	1	1	1	10.9	10.9	10.9	11.305	0.0042373	6.1154	79291000	3	Q86SG5;P31151	Q86SG5;P31151
MAT2A	S-adenosylmethionine synthase isoform type-2	-3.61442	-3.652	2	2	2	7.6	7.6	7.6	43.66	0	19.603	4352000	3	P31153	P31153
ATIC	Bifunctional purine biosynthesis protein PURH;Phosphoribosylaminoimidazolecarboxamide formyltransferase;IMP cyclohydrolase	-3.5648	-3.5942	1	1	1	3.4	3.4	3.4	64.615	0	6.6822	16631000	1	P31939	P31939
HNRNPH1	Heterogeneous nuclear ribonucleoprotein H;Heterogeneous nuclear ribonucleoprotein H, N-terminally processed	1.26793	1.53359	9	9	7	23.2	23.2	17.1	49.229	0	86.333	252980000	22	P31943;P55795	P31943
YWHAB	14-3-3 protein beta/alpha;14-3-3 protein beta/alpha, N-terminally processed	-3.47887	-4.09456	4	1	1	15.4	5.7	5.7	28.082	0	9.8282	19250000	1	P31946	P31946
SFN	14-3-3 protein sigma	1.99487	1.51121	3	1	1	9.3	3.2	3.2	27.774	0	16.661	83829000	8	P31947	P31947
STIP1	Stress-induced-phosphoprotein 1	-1.83838	-1.28885	2	2	2	4.1	4.1	4.1	62.639	0	13.319	11465000	2	P31948	P31948
PRDX2	Peroxiredoxin-2	3.02069	2.87764	5	4	4	24.2	18.7	18.7	21.892	0	24.503	186270000	11	P32119	P32119
RPL9	60S ribosomal protein L9	0.462207	0.231091	2	2	2	9.4	9.4	9.4	21.863	0	30.355	90593000	7	P32969	P32969
DUT	Deoxyuridine 5-triphosphate nucleotidohydrolase, mitochondrial	-0.887374	-0.981898	2	2	2	7.1	7.1	7.1	26.563	0	14.164	110000000	5	P33316	P33316
SHMT2	Serine hydroxymethyltransferase, mitochondrial	-1.59756	-0.978226	2	2	2	4.8	4.8	4.8	55.992	0	13.767	27865000	7	P34897	P34897
HSPA4;HSPH1;HSPA4L	Heat shock 70 kDa protein 4;Heat shock protein 105 kDa;Heat shock 70 kDa protein 4L	-0.493534	-0.792565	2	2	2	2.5	2.5	2.5	94.33	0	13.653	25041000	5	P34932;Q92598;O95757	P34932;Q92598;O95757
RPL22	60S ribosomal protein L22	2.06194	1.37162	4	4	4	40.6	40.6	40.6	14.787	0	174.84	183850000	18	P35268	P35268
MYH9	Myosin-9	-2.18881	-2.52434	3	3	1	1.6	1.6	0.5	226.53	0	18.539	11350000	3	P35579	P35579
PSMC2	26S protease regulatory subunit 7	-6.26204	-5.85266	2	2	2	6.9	6.9	6.9	48.633	0	12.661	11096000	2	P35998	P35998
RPL4	60S ribosomal protein L4	2.78644	2.83055	8	8	8	19.9	19.9	19.9	47.697	0	222.15	210440000	22	P36578	P36578
TAGLN2	Transgelin-2	2.05073	1.98609	8	8	8	42.7	42.7	42.7	22.391	0	55.774	680430000	38	P37802;Q9UI15	P37802
TALDO1	Transaldolase	0.709302	0.863503	5	5	5	13.9	13.9	13.9	37.54	0	31.436	100230000	9	P37837	P37837
ETFB	Electron transfer flavoprotein subunit beta	-4.52339	-4.56997	1	1	1	6.7	6.7	6.7	27.843	0.0022727	6.276	3603100	1	P38117	P38117
HSPA9	Stress-70 protein, mitochondrial	2.21998	2.19774	8	8	8	15.3	15.3	15.3	73.68	0	182.09	542000000	27	P38646	P38646
EIF4A3	Eukaryotic initiation factor 4A-III;Eukaryotic initiation factor 4A-III, N-terminally processed	-0.621588	-0.832994	4	3	3	14.1	10.2	10.2	46.871	0	20.927	67994000	4	P38919	P38919
RPL3	60S ribosomal protein L3	3.3447	3.15649	8	8	8	15.1	15.1	15.1	46.108	0	52.216	461430000	20	P39023;Q92901	P39023
CCT6A	T-complex protein 1 subunit zeta	1.11074	1.04364	6	6	6	12.4	12.4	12.4	58.024	0	46.123	241640000	14	P40227;Q92526	P40227
RPL13A	60S ribosomal protein L13a	1.01595	0.501948	5	5	5	21.7	21.7	21.7	23.577	0	34.922	176270000	21	P40429;Q6NVV1	P40429
MDH1	Malate dehydrogenase, cytoplasmic	1.04728	0.977126	4	4	4	13.5	13.5	13.5	36.426	0	36.569	173800000	12	P40925	P40925
MDH2	Malate dehydrogenase, mitochondrial	1.98286	1.98822	7	7	7	26.3	26.3	26.3	35.503	0	61.283	248690000	21	P40926	P40926
EIF2S3;EIF2S3L	Eukaryotic translation initiation factor 2 subunit 3;Putative eukaryotic translation initiation factor 2 subunit 3-like protein	-0.503791	-0.483136	3	3	2	7.6	7.6	4.2	51.109	0	17.416	61548000	7	P41091;Q2VIR3	P41091;Q2VIR3
ECI1	Enoyl-CoA delta isomerase 1, mitochondrial	-2.9127	-3.80116	2	2	2	7.6	7.6	7.6	32.816	0	12.68	10128000	2	P42126	P42126
TMPO	Lamina-associated polypeptide 2, isoform alpha;Thymopoietin;Thymopentin	-2.16362	-2.2266	2	2	2	4.2	4.2	4.2	75.491	0	19.336	21327000	5	P42166	P42166
RPS27;RPS27L	40S ribosomal protein S27;40S ribosomal protein S27-like	0.537469	-0.25095	2	2	2	25	25	25	9.461	0	14.212	84590000	5	P42677;Q71UM5	P42677;Q71UM5
MATR3	Matrin-3	-1.25719	-1.33084	5	5	5	8.1	8.1	8.1	94.622	0	37.875	47549000	6	P43243	P43243
VDAC2	Voltage-dependent anion-selective channel protein 2	-0.382016	-0.159991	6	6	6	24.1	24.1	24.1	31.566	0	38.275	62253000	9	P45880	P45880
RANGAP1	Ran GTPase-activating protein 1	-2.08421	-2.27858	2	2	2	4.4	4.4	4.4	63.541	0	13.712	8123800	3	P46060	P46060
RPL27A	60S ribosomal protein L27a	1.09559	0.743382	3	3	3	16.2	16.2	16.2	16.561	0	18.193	64707000	5	P46776	P46776
RPL5	60S ribosomal protein L5	1.2263	1.08557	4	4	4	14.8	14.8	14.8	34.362	0	28.878	100930000	8	P46777	P46777
RPL21	60S ribosomal protein L21	1.24005	0.683715	3	3	3	20.6	20.6	20.6	18.565	0	17.696	134840000	4	P46778	P46778
RPL28	60S ribosomal protein L28	2.72862	2.24372	10	10	9	52.6	52.6	45.3	15.747	0	67.068	364130000	20	P46779	P46779
RPS9	40S ribosomal protein S9	1.75025	1.24167	6	6	6	25.8	25.8	25.8	22.591	0	35.508	214770000	10	P46781	P46781
RPS5	40S ribosomal protein S5;40S ribosomal protein S5, N-terminally processed	-0.854016	-0.606524	3	3	3	18.1	18.1	18.1	22.876	0	19.255	56441000	9	P46782	P46782
RPL29	60S ribosomal protein L29	0.622828	0.607505	3	3	3	15.1	15.1	15.1	17.752	0	24.33	167150000	7	P47914	P47914
ATP5O	ATP synthase subunit O, mitochondrial	2.17575	3.62137	5	5	5	25.4	25.4	25.4	23.277	0	69.262	168880000	32	P48047	P48047
CCT5	T-complex protein 1 subunit epsilon	1.93754	2.10887	5	5	5	10.2	10.2	10.2	59.67	0	30.076	82915000	12	P48643	P48643
ALDH9A1	4-trimethylaminobutyraldehyde dehydrogenase	-1.30737	-2.15778	1	1	1	2.4	2.4	2.4	53.801	1	-2	1985900	1	P49189	P49189
RPL34	60S ribosomal protein L34	2.32298	1.8899	6	6	6	41.9	41.9	41.9	13.293	0	47.776	368700000	12	P49207	P49207
NASP	Nuclear autoantigenic sperm protein	0	-0.114427	4	4	4	8.2	8.2	8.2	85.237	0	32.511	67607000	8	P49321	P49321
FASN	Fatty acid synthase;[Acyl-carrier-protein] S-acetyltransferase;[Acyl-carrier-protein] S-malonyltransferase;3-oxoacyl-[acyl-carrier-protein] synthase;3-oxoacyl-[acyl-carrier-protein] reductase;3-hydroxyacyl-[acyl-carrier-protein] dehydratase;Enoyl-[acyl-carrier-protein] reductase;Oleoyl-[acyl-carrier-protein] hydrolase	2.09073	1.3344	13	13	12	5.9	5.9	5.4	273.42	0	78.527	172820000	16	P49327	P49327
CCT3	T-complex protein 1 subunit gamma	2.12823	2.18653	8	8	8	15	15	15	60.533	0	58.234	254660000	24	P49368	P49368
TUFM	Elongation factor Tu, mitochondrial	0.97954	0.846492	9	9	9	24.3	24.3	24.3	49.541	0	72.645	130450000	18	P49411	P49411
HINT1	Histidine triad nucleotide-binding protein 1	0.983395	1.35397	1	1	1	11.1	11.1	11.1	13.802	0	9.7333	83072000	4	P49773	P49773
GMPS	GMP synthase [glutamine-hydrolyzing]	-1.71908	-1.74876	1	1	1	1.6	1.6	1.6	76.715	0.0024155	6.4526	12682000	3	P49915	P49915
GDI2;GDI1	Rab GDP dissociation inhibitor beta;Rab GDP dissociation inhibitor alpha	0.0853605	0.0757494	4	4	4	10.3	10.3	10.3	50.663	0	39.7	59078000	11	P50395;P31150	P50395;P31150
SERPINH1	Serpin H1	-1.3574	-1.45248	4	4	4	10	10	10	46.44	0	26.983	53580000	6	P50454	P50454
RPL14	60S ribosomal protein L14	1.87517	1.61912	3	3	3	16.3	16.3	16.3	23.432	0	21.861	169350000	20	P50914	P50914
CCT8	T-complex protein 1 subunit theta	1.90699	1.854	8	8	8	16.4	16.4	16.4	59.62	0	112.33	314950000	19	P50990	P50990
CCT4	T-complex protein 1 subunit delta	1.44321	1.29368	8	8	8	16	16	16	57.924	0	244.25	524350000	22	P50991	P50991
ANXA11	Annexin A11	-4.80695	-5.36544	1	1	1	3.2	3.2	3.2	54.389	0.0023364	6.3652	14142000	1	P50995	P50995
RAB5C	Ras-related protein Rab-5C	-1.41787	-1.37645	4	4	4	25.9	25.9	25.9	23.482	0	25.609	70734000	7	P51148;P20339;P61020	P51148
RAB7A	Ras-related protein Rab-7a	-2.31667	-2.23919	2	2	2	12.1	12.1	12.1	23.489	0	20.959	60116000	6	P51149	P51149
RAB9A;RAB9B	Ras-related protein Rab-9A;Ras-related protein Rab-9B	-2.88337	-1.81029	1	1	1	5.5	5.5	5.5	22.837	0	13.024	12522000	2	P51151;Q9NP90	P51151;Q9NP90
HNRNPA3	Heterogeneous nuclear ribonucleoprotein A3	0.555109	0.451198	3	2	2	9.5	7.7	7.7	39.594	0	28.188	196320000	5	P51991	P51991
PGD	6-phosphogluconate dehydrogenase, decarboxylating	0.552157	0.43763	3	3	3	6.8	6.8	6.8	53.139	0	54.183	68514000	10	P52209	P52209
HNRNPM	Heterogeneous nuclear ribonucleoprotein M	2.29517	2.42877	9	9	9	15.3	15.3	15.3	77.515	0	89.529	256880000	21	P52272	P52272
KPNA2	Importin subunit alpha-1	-0.0322065	-0.0111513	3	3	3	7.8	7.8	7.8	57.861	0	49.361	68604000	9	P52292	P52292
POLR2H	DNA-directed RNA polymerases I, II, and III subunit RPABC3	-2.0555	-3.05549	1	1	1	10.7	10.7	10.7	17.143	0	8.9252	16895000	3	P52434	P52434
ARHGDIA	Rho GDP-dissociation inhibitor 1	-2.97901	-3.41858	1	1	1	7.4	7.4	7.4	23.207	0	8.1893	3840100	2	P52565	P52565
HNRNPF	Heterogeneous nuclear ribonucleoprotein F;Heterogeneous nuclear ribonucleoprotein F, N-terminally processed	-2.71009	-2.47219	4	2	2	13.5	7	7	45.671	0	12.856	18283000	4	P52597	P52597
ACLY	ATP-citrate synthase	0.124447	-0.594604	5	5	5	5.2	5.2	5.2	120.84	0	58.509	54010000	7	P53396	P53396
CTSC	Dipeptidyl peptidase 1;Dipeptidyl peptidase 1 exclusion domain chain;Dipeptidyl peptidase 1 heavy chain;Dipeptidyl peptidase 1 light chain	-2.47431	-1.65033	1	1	1	2.6	2.6	2.6	51.853	0	7.2873	19264000	5	P53634	P53634
CLNS1A	Methylosome subunit pICln	-2.50475	-2.05274	1	1	1	5.5	5.5	5.5	26.215	0	6.9126	9653800	2	P54105	P54105
VCP	Transitional endoplasmic reticulum ATPase	0.708228	0.438425	4	4	4	6.6	6.6	6.6	89.321	0	29.107	90963000	6	P55072	P55072
TPI1	Triosephosphate isomerase	5.01832	5.26737	16	16	16	71.5	71.5	71.5	26.669	0	293.7	2814300000	101	P60174	P60174
ACTB;ACTA1;ACTA2;ACTG2;ACTC1	Actin, cytoplasmic 1;Actin, cytoplasmic 1, N-terminally processed;Actin, alpha skeletal muscle;Actin, aortic smooth muscle;Actin, gamma-enteric smooth muscle;Actin, alpha cardiac muscle 1	5.3434	5.55233	23	23	1	62.9	62.9	4.5	41.736	0	323.31	14945000000	151	P60709;P68133;P62736;P63267;P68032;Q562R1;Q6S8J3;A5A3E0;P0CG38;P0CG39;Q9BYX7	P60709;P68133;P62736;P63267;P68032
EIF4A1;EIF4A2	Eukaryotic initiation factor 4A-I;Eukaryotic initiation factor 4A-II;Eukaryotic initiation factor 4A-II, N-terminally processed	2.87766	2.74763	7	7	6	19.7	19.7	15.8	46.153	0	287.28	988330000	31	P60842;Q14240	P60842;Q14240
RPS20	40S ribosomal protein S20	2.13582	1.87029	5	5	5	36.1	36.1	36.1	13.373	0	40.791	394620000	15	P60866	P60866
PSMA6	Proteasome subunit alpha type-6	-1.54079	-1.71786	4	4	4	19.1	19.1	19.1	27.399	0	26.361	37265000	5	P60900	P60900
CDC42	Cell division control protein 42 homolog	-1.0049	-1.2905	1	1	1	5.8	5.8	5.8	21.258	0	6.693	16487000	2	P60953	P60953
DSTN	Destrin	-6.70864	-6.09625	1	1	1	7.3	7.3	7.3	18.506	0	7.0002	16949000	4	P60981	P60981
UBE2M	NEDD8-conjugating enzyme Ubc12	-2.34132	-2.41404	2	2	2	10.4	10.4	10.4	20.9	0	11.57	21006000	3	P61081	P61081
RAP1B;RAP1A	Ras-related protein Rap-1b;Ras-related protein Rap-1A	-4.45282	-4.67968	1	1	1	6	6	6	20.825	0.0043573	6.1548	753160	1	P61224;P62834	P61224;P62834
RPS3A	40S ribosomal protein S3a	2.24926	1.8514	8	8	8	30.3	30.3	30.3	29.945	0	53.307	250870000	13	P61247	P61247
RPL26;RPL26L1	60S ribosomal protein L26;60S ribosomal protein L26-like 1	-1.24332	-1.23256	2	2	2	16.6	16.6	16.6	17.258	0	13.22	21610000	2	P61254;Q9UNX3	P61254;Q9UNX3
RPL15	60S ribosomal protein L15	2.14326	2.21229	6	6	6	28.9	28.9	28.9	24.146	0	52.711	275640000	12	P61313	P61313
RPL27	60S ribosomal protein L27	-3.24409	-3.96141	1	1	1	8.1	8.1	8.1	15.798	0.0042553	6.1214	5411700	1	P61353	P61353
RPL37A	60S ribosomal protein L37a	1.75914	0.561437	4	4	4	50	50	50	10.275	0	35.691	62459000	8	P61513;A6NKH3	P61513
RPL37	60S ribosomal protein L37	3.70769	3.24432	5	5	5	33	33	33	11.078	0	33.26	755330000	11	P61927	P61927
SUMO2;SUMO3;SUMO4	Small ubiquitin-related modifier 2;Small ubiquitin-related modifier 3;Small ubiquitin-related modifier 4	1.14286	0.833081	2	2	2	23.2	23.2	23.2	10.871	0	13.518	66562000	14	P61956;P55854;Q6EEV6	P61956;P55854;Q6EEV6
HNRNPK	Heterogeneous nuclear ribonucleoprotein K	0.555826	0.594521	7	7	7	14.5	14.5	14.5	50.976	0	58.006	146720000	12	P61978	P61978
YWHAG	14-3-3 protein gamma;14-3-3 protein gamma, N-terminally processed	-3.20038	-2.5873	3	1	1	11.7	5.7	5.7	28.302	0	9.7308	13413000	3	P61981	P61981
RPS8	40S ribosomal protein S8	2.98564	2.77272	9	9	9	45.2	45.2	45.2	24.205	0	95.927	1440900000	30	P62241	P62241
RPS15A	40S ribosomal protein S15a	1.93433	1.4403	2	2	2	13.1	13.1	13.1	14.839	0	12.326	216050000	3	P62244	P62244
RPS16	40S ribosomal protein S16	2.4256	1.54471	7	7	7	45.9	45.9	45.9	16.445	0	50.051	179990000	21	P62249	P62249
YWHAE	14-3-3 protein epsilon	3.1915	3.25427	8	6	6	36.1	30.2	30.2	29.174	0	121.19	360940000	54	P62258	P62258
RPS14	40S ribosomal protein S14	2.27022	1.43967	9	9	9	41.7	41.7	41.7	16.273	0	159.47	663960000	26	P62263	P62263
RPS23	40S ribosomal protein S23	2.34744	1.67111	2	2	2	13.3	13.3	13.3	15.807	0	13.55	111540000	13	P62266	P62266
RPS29	40S ribosomal protein S29	-1.88488	-1.95019	1	1	1	19.6	19.6	19.6	6.6767	0	7.5987	27029000	4	P62273	P62273
RPS11	40S ribosomal protein S11	1.77568	1.00008	7	7	7	38.6	38.6	38.6	18.431	0	43.607	66314000	8	P62280	P62280
PSMC6	26S protease regulatory subunit 10B	-2.99022	-3.01849	2	2	2	6.9	6.9	6.9	44.172	0	13.635	3064300	3	P62333	P62333
RPL7A	60S ribosomal protein L7a	3.71332	2.69191	12	12	12	41.7	41.7	41.7	29.995	0	122.08	521710000	30	P62424	P62424
RPS4X;RPS4Y1;RPS4Y2	40S ribosomal protein S4, X isoform;40S ribosomal protein S4, Y isoform 1;40S ribosomal protein S4, Y isoform 2	1.67744	1.43701	6	6	6	26.6	26.6	26.6	29.597	0	43.863	171440000	19	P62701;P22090;Q8TD47	P62701;P22090;Q8TD47
RPS6	40S ribosomal protein S6	1.48606	1.22116	3	3	3	12.9	12.9	12.9	28.68	0	22.952	131250000	7	P62753	P62753
HIST1H4A	Histone H4	4.88455	4.7296	10	10	10	58.3	58.3	58.3	11.367	0	154.15	4355700000	86	P62805	P62805
RAB1A	Ras-related protein Rab-1A	0.787361	0.782548	2	2	1	8.8	8.8	3.4	22.677	0	19.817	52407000	3	P62820	P62820
RAN	GTP-binding nuclear protein Ran	2.16384	1.5537	7	7	7	30.1	30.1	30.1	24.423	0	106.23	293260000	24	P62826	P62826
RPL23	60S ribosomal protein L23	-2.1895	-2.61786	4	4	4	33.6	33.6	33.6	14.865	0	28.135	47861000	7	P62829	P62829
RPS24	40S ribosomal protein S24	1.60727	1.19714	3	3	3	19.5	19.5	19.5	15.423	0	20.095	72622000	7	P62847	P62847
RPS25	40S ribosomal protein S25	1.12938	1.23698	3	3	3	20.8	20.8	20.8	13.742	0	20.672	149930000	12	P62851	P62851
RPS26;RPS26P11	40S ribosomal protein S26;Putative 40S ribosomal protein S26-like 1	0.135468	-0.590103	2	2	2	20.9	20.9	20.9	13.015	0	16.059	137550000	7	P62854;Q5JNZ5	P62854;Q5JNZ5
RPS28	40S ribosomal protein S28	-3.57872	-3.15915	2	2	2	23.2	23.2	23.2	7.8409	0	12.502	45889000	2	P62857	P62857
GNB2;GNB1;GNB4;GNB3	Guanine nucleotide-binding protein G(I)/G(S)/G(T) subunit beta-2;Guanine nucleotide-binding protein G(I)/G(S)/G(T) subunit beta-1;Guanine nucleotide-binding protein subunit beta-4;Guanine nucleotide-binding protein G(I)/G(S)/G(T) subunit beta-3	-3.26443	-3.23954	2	2	2	5.9	5.9	5.9	37.331	0	12.634	46677000	3	P62879;P62873;Q9HAV0;P16520	P62879;P62873;Q9HAV0;P16520
RPL30	60S ribosomal protein L30	-0.79991	-0.851669	4	4	4	32.2	32.2	32.2	12.784	0	28.266	391730000	9	P62888	P62888
RPL10A	60S ribosomal protein L10a	-2.84291	-2.8622	2	2	2	9.7	9.7	9.7	24.831	0	13.222	200390000	2	P62906	P62906
RPL32	60S ribosomal protein L32	2.78123	2.4595	6	6	6	38.5	38.5	38.5	15.86	0	61.179	2493000000	26	P62910	P62910
RPL11	60S ribosomal protein L11	1.531	0.877892	3	3	3	16.3	16.3	16.3	20.252	0	19.938	90651000	13	P62913	P62913
RPL8	60S ribosomal protein L8	2.42006	2.34863	6	6	6	19.8	19.8	19.8	28.024	0	203.02	349570000	21	P62917	P62917
PPIA	Peptidyl-prolyl cis-trans isomerase A;Peptidyl-prolyl cis-trans isomerase A, N-terminally processed	4.01046	3.80892	10	10	10	75.2	75.2	75.2	18.012	0	95.466	1021600000	39	P62937;Q9Y536;F5H284;P0DN37;P0DN26;A0A0B4J2A2;A0A075B767;A0A075B759	P62937
FKBP1A	Peptidyl-prolyl cis-trans isomerase FKBP1A	0.158102	-0.662531	2	2	2	25	25	25	11.951	0	77.285	71127000	10	P62942	P62942
RPS27A;UBC;UBB;UBA52	Ubiquitin-40S ribosomal protein S27a;Ubiquitin;40S ribosomal protein S27a;Polyubiquitin-C;Ubiquitin;Polyubiquitin-B;Ubiquitin;Ubiquitin-60S ribosomal protein L40;Ubiquitin;60S ribosomal protein L40	2.288	1.8959	6	6	6	48.1	48.1	48.1	17.965	0	47.315	625200000	23	P62979;A0A2R8Y422;P0CG48;P0CG47;P62987	P62979;A0A2R8Y422;P0CG48;P0CG47;P62987
RAC1;RAC3	Ras-related C3 botulinum toxin substrate 1;Ras-related C3 botulinum toxin substrate 3	-3.14713	-3.02223	2	2	2	12	12	12	21.45	0	12.773	10342000	3	P63000;P60763	P63000;P60763
YWHAZ	14-3-3 protein zeta/delta	3.93407	3.56073	9	9	6	41.6	41.6	31.8	27.745	0	104.26	501750000	55	P63104	P63104
DYNLL1;DYNLL2	Dynein light chain 1, cytoplasmic;Dynein light chain 2, cytoplasmic	-1.71408	-1.83653	1	1	1	12.4	12.4	12.4	10.366	0.0024038	6.4454	19564000	4	P63167;Q96FJ2	P63167;Q96FJ2
RPL38	60S ribosomal protein L38	-0.0494308	-0.621856	1	1	1	14.3	14.3	14.3	8.2178	0	6.7307	15445000	9	P63173	P63173
RPS21	40S ribosomal protein S21	0.137706	-0.218365	3	3	3	42.2	42.2	42.2	9.1113	0	20.647	55315000	9	P63220	P63220
EIF5A;EIF5AL1	Eukaryotic translation initiation factor 5A-1;Eukaryotic translation initiation factor 5A-1-like	-2.37021	-2.49239	3	3	1	28.6	28.6	11.7	16.832	0	20.067	28066000	2	P63241;Q6IS14;Q9GZV4	P63241;Q6IS14
GNB2L1	Guanine nucleotide-binding protein subunit beta-2-like 1;Guanine nucleotide-binding protein subunit beta-2-like 1, N-terminally processed	0.564166	0.378263	8	8	8	30	30	30	35.076	0	78.794	144940000	17	P63244	P63244
ACTG1	Actin, cytoplasmic 2;Actin, cytoplasmic 2, N-terminally processed	-3.55458	-3.13909	23	1	1	62.9	4.5	4.5	41.792	0	7.189	12082000	1	P63261	P63261
EEF1A1;EEF1A1P5	Elongation factor 1-alpha 1;Putative elongation factor 1-alpha-like 3	5.82899	5.53179	19	19	19	39.6	39.6	39.6	50.14	0	248.11	3597300000	116	P68104;Q5VTE0;Q05639	P68104;Q5VTE0
TUBA1B;TUBA1A;TUBA4A;TUBA3E	Tubulin alpha-1B chain;Tubulin alpha-1A chain;Tubulin alpha-4A chain;Tubulin alpha-3E chain	4.73398	4.49757	13	13	2	35.3	35.3	6.7	50.151	0	269.1	2070400000	69	P68363;Q71U36;P0DPH8;P0DPH7;P68366;Q6PEY2;Q9NY65;A6NHL2	P68363;Q71U36;P0DPH8;P0DPH7;P68366;Q6PEY2
TUBB4B;TUBB4A;TUBB8	Tubulin beta-4B chain;Tubulin beta-4A chain;Tubulin beta-8 chain	3.92377	3.79113	14	14	3	34.4	34.4	9.9	49.83	0	124.22	1154400000	100	P68371;P04350;Q3ZCM7	P68371;P04350;Q3ZCM7
HIST1H3A;HIST2H3A;HIST3H3;HIST2H3PS2	Histone H3.1;Histone H3.2;Histone H3.1t;Histone H3	6.43183	4.78288	7	7	2	32.4	32.4	7.4	15.404	0	88.733	14388000000	82	P68431;Q71DI3;Q16695;Q5TEC6;Q6NXT2	P68431;Q71DI3;Q16695;Q5TEC6
CCT2	T-complex protein 1 subunit beta	-0.85	-1.33266	2	2	2	4.1	4.1	4.1	57.488	0	11.974	9194100	3	P78371	P78371
GSTO1	Glutathione S-transferase omega-1	-0.451425	0.0388737	3	3	3	13.7	13.7	13.7	27.566	0	38.056	111690000	11	P78417	P78417
DCD	Dermcidin;Survival-promoting peptide;DCD-1	2.13021	0.952929	3	3	3	29.1	29.1	29.1	11.284	0	19.707	208200000	9	P81605	P81605
RPL24	60S ribosomal protein L24	3.66235	3.70315	10	10	10	40.1	40.1	40.1	17.779	0	67.559	601680000	22	P83731	P83731
RPL36A	60S ribosomal protein L36a	1.93874	0.989345	3	3	3	17.9	17.9	17.9	12.441	0	18.09	88114000	7	P83881;Q969Q0	P83881
CBX3;CBX1	Chromobox protein homolog 3;Chromobox protein homolog 1	-1.84123	-1.79089	1	1	1	8.7	8.7	8.7	20.811	0	9.8044	35582000	1	Q13185;P83916	Q13185;P83916
ERH	Enhancer of rudimentary homolog	2.11917	2.03567	3	3	3	36.5	36.5	36.5	12.259	0	21.501	332470000	9	P84090	P84090
RPL19	60S ribosomal protein L19	0.561233	0.512664	4	4	4	17.3	17.3	17.3	23.466	0	31.739	123930000	6	P84098	P84098
SRSF3	Serine/arginine-rich splicing factor 3	0.675171	0.832477	3	3	3	22.6	22.6	22.6	19.329	0	34.75	83938000	9	P84103	P84103
H3F3A	Histone H3.3	2.39596	0.15727	7	2	2	32.4	7.4	7.4	15.328	0	11.871	99309000	5	P84243	P84243
SLC25A3	Phosphate carrier protein, mitochondrial	0.855989	2.67044	3	3	3	7.7	7.7	7.7	40.094	0	27.423	179700000	15	Q00325	Q00325
CLTC	Clathrin heavy chain 1	1.37221	0.791019	5	5	5	3.3	3.3	3.3	191.61	0	31.905	74348000	8	Q00610;P53675	Q00610
HNRNPU	Heterogeneous nuclear ribonucleoprotein U	2.81883	2.39005	11	11	11	14.8	14.8	14.8	90.583	0	98.992	319710000	35	Q00839	Q00839
SRSF2	Serine/arginine-rich splicing factor 2	-2.27998	-2.39531	1	1	1	5	5	5	25.476	0.0023202	6.354	5729900	2	Q01130	Q01130
PFKP	ATP-dependent 6-phosphofructokinase, platelet type	0.974186	2.11709	17	17	16	28.2	28.2	25.8	85.595	0	156.42	708800000	48	Q01813	Q01813
RPL18A	60S ribosomal protein L18a	2.10966	1.95333	6	6	6	27.3	27.3	27.3	20.762	0	43.421	154250000	23	Q02543	Q02543
FKBP4	Peptidyl-prolyl cis-trans isomerase FKBP4;Peptidyl-prolyl cis-trans isomerase FKBP4, N-terminally processed	-0.368212	-0.357401	5	5	5	13.3	13.3	13.3	51.804	0	32.741	30986000	6	Q02790	Q02790
RPL6	60S ribosomal protein L6	1.07345	0.415652	5	5	5	18.1	18.1	18.1	32.728	0	89.762	42087000	11	Q02878	Q02878
SLC25A11	Mitochondrial 2-oxoglutarate/malate carrier protein	-1.68288	-1.50021	2	2	2	9.6	9.6	9.6	34.061	0	20.264	13168000	5	Q02978	Q02978
EIF4G1	Eukaryotic translation initiation factor 4 gamma 1	-3.59674	-3.83213	3	3	3	3.3	3.3	3.3	175.49	0	29.29	7085700	3	Q04637	Q04637
PRDX1	Peroxiredoxin-1	2.91092	2.98107	7	7	5	32.2	32.2	23.1	22.11	0	106.82	1013500000	28	Q06830	Q06830
RPL18	60S ribosomal protein L18	1.62621	1.44336	6	6	6	38.3	38.3	38.3	21.634	0	210.01	245740000	20	Q07020	Q07020
CKAP4	Cytoskeleton-associated protein 4	-4.74012	-4.99883	1	1	1	3.2	3.2	3.2	66.022	0.004386	6.1735	2818900	1	Q07065	Q07065
DHX9	ATP-dependent RNA helicase A	-0.357521	-0.960273	7	7	7	6.9	6.9	6.9	140.96	0	49.51	128620000	11	Q08211	Q08211
DSC1	Desmocollin-1	-4.56394	-5.18811	2	2	2	2.8	2.8	2.8	99.986	0	20.273	42742000	4	Q08554	Q08554
RBBP4;RBBP7	Histone-binding protein RBBP4;Histone-binding protein RBBP7	-0.944953	-1.27002	2	2	2	4.5	4.5	4.5	47.655	0	11.418	9140900	2	Q09028;Q16576	Q09028;Q16576
ILF3	Interleukin enhancer-binding factor 3	-3.04851	-3.87377	3	3	3	5.1	5.1	5.1	95.337	0	36.965	14916000	3	Q12906	Q12906
TRAP1	Heat shock protein 75 kDa, mitochondrial	-2.15718	-2.00058	2	2	2	3.4	3.4	3.4	80.109	0	15.695	13506000	4	Q12931	Q12931
ACACA	Acetyl-CoA carboxylase 1;Biotin carboxylase	-1.51942	-1.02567	3	3	3	1.5	1.5	1.5	265.55	0	18.548	41379000	6	Q13085	Q13085
TARDBP	TAR DNA-binding protein 43	-2.9359	-3.67359	1	1	1	4.3	4.3	4.3	44.739	0	12.219	10509000	2	Q13148	Q13148
HNRNPA0	Heterogeneous nuclear ribonucleoprotein A0	-0.764589	-0.569727	2	2	2	10.5	10.5	10.5	30.84	0	17.563	42139000	3	Q13151	Q13151
PRDX4	Peroxiredoxin-4	-1.94927	-1.64908	2	1	1	6.6	4.1	4.1	30.54	0	9.4516	80770000	4	Q13162	Q13162
MAD2L1	Mitotic spindle assembly checkpoint protein MAD2A	-1.83813	-1.9057	1	1	1	3.9	3.9	3.9	23.51	0.0023041	6.326	13237000	3	Q13257	Q13257
TRIM28	Transcription intermediary factor 1-beta	-0.214879	0	4	4	4	5.9	5.9	5.9	88.549	0	52.096	214840000	8	Q13263	Q13263
G3BP1	Ras GTPase-activating protein-binding protein 1	-1.80244	-1.88993	3	3	3	10.5	10.5	10.5	52.164	0	19.358	18072000	5	Q13283	Q13283
EIF3I	Eukaryotic translation initiation factor 3 subunit I	-3.12265	-3.63706	2	2	2	6.5	6.5	6.5	36.501	0	11.563	28194000	3	Q13347	Q13347
UBE2V1	Ubiquitin-conjugating enzyme E2 variant 1	-1.25912	-1.23694	2	2	1	12.9	12.9	4.8	16.495	0	9.8603	9712800	3	Q13404	Q13404
SF3B2	Splicing factor 3B subunit 2	-3.00049	-2.54287	1	1	1	1.5	1.5	1.5	100.23	1	-2	4879700	2	Q13435	Q13435
DDX39B	Spliceosome RNA helicase DDX39B	0.567172	0.592584	5	5	5	11.4	11.4	11.4	48.991	0	29.526	76133000	7	Q13838;O00148	Q13838
TUBB2B;TUBB2A;TUBB6	Tubulin beta-2B chain;Tubulin beta-2A chain;Tubulin beta-6 chain	-1.4	-1.12533	11	1	1	24.5	2.7	2.7	49.953	1	-2	8806300	4	Q9BVA1;Q13885;Q9BUF5	Q9BVA1;Q13885;Q9BUF5
HNRNPD	Heterogeneous nuclear ribonucleoprotein D0	-1.73611	-1.36955	2	2	2	6.5	6.5	6.5	38.434	0	25.486	76631000	3	Q14103	Q14103
RBM39	RNA-binding protein 39	-3.02544	-3.17268	1	1	1	2.8	2.8	2.8	59.379	0	7.1326	1875000	3	Q14498	Q14498
ITPR1	Inositol 1,4,5-trisphosphate receptor type 1	1.62302	1.45944	1	1	1	0.5	0.5	0.5	313.93	1	-2	266610000	1	Q14643	Q14643
GANAB	Neutral alpha-glucosidase AB	-0.898681	-1.18016	3	3	3	4.4	4.4	4.4	106.87	0	19.023	138630000	6	Q14697	Q14697
KPNB1	Importin subunit beta-1	0.493816	0.40349	6	6	5	8.6	8.6	7.5	97.169	0	46.107	128080000	11	Q14974	Q14974
EIF4H	Eukaryotic translation initiation factor 4H	1.17313	2.20943	6	6	6	29.4	29.4	29.4	27.385	0	69.21	159330000	16	Q15056	Q15056
PDIA6	Protein disulfide-isomerase A6	-1.07906	-1.04895	1	1	1	3	3	3	48.121	0	8.0755	41038000	2	Q15084	Q15084
PPA1	Inorganic pyrophosphatase	0.452057	0.886573	2	2	2	5.5	5.5	5.5	32.66	0	11.388	52387000	4	Q15181	Q15181
PTGES3	Prostaglandin E synthase 3	1.45569	1.42428	4	4	4	23.1	23.1	23.1	18.697	0	24.386	76102000	8	Q15185	Q15185
NONO	Non-POU domain-containing octamer-binding protein	2.24929	1.6601	5	5	4	11.9	11.9	10.2	54.231	0	58.477	214310000	16	Q15233;Q8WXF1	Q15233
PCBP1	Poly(rC)-binding protein 1	-0.919349	-0.976469	4	1	1	14	3.1	3.1	37.497	0	12.841	28021000	5	Q15365	Q15365
PCBP2;PCBP3	Poly(rC)-binding protein 2;Poly(rC)-binding protein 3	1.76659	1.59986	6	6	3	20.5	20.5	9.9	38.58	0	49.403	219870000	18	Q15366;P57721;P57723	Q15366;P57721
TCEB1	Transcription elongation factor B polypeptide 1	-2.24398	-2.13848	3	3	3	34.8	34.8	34.8	12.473	0	36.358	26246000	4	Q15369	Q15369
CNN3	Calponin-3	-0.133633	-0.679827	2	2	2	8.5	8.5	8.5	36.413	0	14.414	46038000	3	Q15417	Q15417
TRIP6	Thyroid receptor-interacting protein 6	-2.26055	-3.08026	1	1	1	3.8	3.8	3.8	50.287	0	11.995	8250900	1	Q15654	Q15654
MAPRE1	Microtubule-associated protein RP/EB family member 1	-0.164403	-0.0379906	3	3	3	16	16	16	29.999	0	30.896	91619000	9	Q15691	Q15691
ADRM1	Proteasomal ubiquitin receptor ADRM1	-1.16803	-1.12805	3	3	3	10.1	10.1	10.1	42.153	0	28.424	35318000	4	Q16186	Q16186
FSCN1	Fascin	-0.084013	0.00393295	2	2	2	5.3	5.3	5.3	54.529	0	15.637	18539000	3	Q16658	Q16658
NDUFA5	NADH dehydrogenase [ubiquinone] 1 alpha subcomplex subunit 5	-3.84307	-4.11748	1	1	1	13.8	13.8	13.8	13.459	0.0022676	6.2727	2667400	1	Q16718	Q16718
TIMM50	Mitochondrial import inner membrane translocase subunit TIM50	-2.7231	-2.33973	1	1	1	3.4	3.4	3.4	39.646	0	7.5576	37493000	2	Q3ZCQ8	Q3ZCQ8
TCHHL1	Trichohyalin-like protein 1	3.11031	2.72635	1	1	1	1.4	1.4	1.4	99.274	0	8.3607	361150000	6	Q5QJ38	Q5QJ38
KPRP	Keratinocyte proline-rich protein	0.424491	0.333177	5	5	5	11.6	11.6	11.6	64.135	0	95.381	1096300000	10	Q5T749	Q5T749
RALGAPA1	Ral GTPase-activating protein subunit alpha-1	1.94711	1.83701	1	1	1	0.3	0.3	0.3	229.83	0.0041929	6.0909	1161100000	10	Q6GYQ0	Q6GYQ0
DDX46	Probable ATP-dependent RNA helicase DDX46	-2.54888	-2.36812	2	2	2	2	2	2	117.36	0	11.797	4815700	4	Q7L014	Q7L014
DCXR	L-xylulose reductase	-4.15252	-3.83479	2	2	2	10.7	10.7	10.7	25.913	0	12.062	15966000	5	Q7Z4W1	Q7Z4W1
PLD3	Phospholipase D3	-2.86739	-0.644284	2	2	2	4.5	4.5	4.5	54.705	0	11.498	43952000	3	Q8IV08	Q8IV08
HIST3H2BB	Histone H2B type 3-B	-0.349636	-0.253955	9	1	1	55.6	5.6	5.6	13.908	0	6.5133	64001000	2	Q8N257;A0A2R8Y619	Q8N257
TXNDC5	Thioredoxin domain-containing protein 5	-4.03144	-4.22529	1	1	1	3.7	3.7	3.7	47.628	0.0023981	6.4318	4287500	1	Q8NBS9	Q8NBS9
SERBP1	Plasminogen activator inhibitor 1 RNA-binding protein	1.54984	1.31468	5	5	5	16.9	16.9	16.9	44.965	0	46.603	131660000	19	Q8NC51	Q8NC51
ABHD11	Alpha/beta hydrolase domain-containing protein 11	-2.18982	-2.1197	2	2	2	7.3	7.3	7.3	34.69	0	11.915	33108000	4	Q8NFV4	Q8NFV4
ANGPTL6	Angiopoietin-related protein 6	1.33821	1.67791	1	1	1	1.5	1.5	1.5	51.694	0.0042194	6.1103	8995600000	9	Q8NI99	Q8NI99
LZIC	Protein LZIC	-0.91634	-0.951529	1	1	1	3.7	3.7	3.7	21.494	0.0043764	6.1665	40816000	2	Q8WZA0	Q8WZA0
DDX1	ATP-dependent RNA helicase DDX1	-4.5336	-4.48852	1	1	1	2.2	2.2	2.2	82.431	0.0023419	6.3654	3223000	2	Q92499	Q92499
H1FX	Histone H1x	2.21669	2.35457	8	8	7	38.5	38.5	30	22.487	0	71.001	343790000	16	Q92522	Q92522
DDX17	Probable ATP-dependent RNA helicase DDX17	-1.80727	-2.28727	4	2	2	6.3	3.2	3.2	80.272	0	12.921	18773000	3	Q92841	Q92841
KHSRP	Far upstream element-binding protein 2	0.828757	0.821811	7	7	7	14.8	14.8	14.8	73.114	0	48.206	104580000	13	Q92945	Q92945
FUBP1	Far upstream element-binding protein 1	1.66006	1.24537	4	4	4	7.8	7.8	7.8	67.56	0	294.28	112200000	6	Q96AE4	Q96AE4
RBM14	RNA-binding protein 14	-3.39617	-2.7118	2	2	2	4	4	4	69.491	0	12.688	8630200	2	Q96PK6	Q96PK6
HMCN1	Hemicentin-1	4.78043	4.16696	1	1	1	0.1	0.1	0.1	613.38	0.0023529	6.3829	36330000000	16	Q96RW7	Q96RW7
TBCB	Tubulin-folding cofactor B	0.405168	0.401162	3	3	3	11.9	11.9	11.9	27.325	0	18.53	56919000	6	Q99426	Q99426
PFDN5	Prefoldin subunit 5	-3.50004	-3.69367	1	1	1	9.7	9.7	9.7	17.328	0.002439	6.4603	1627000	1	Q99471	Q99471
PARK7	Protein deglycase DJ-1	0.762315	0.994373	5	5	5	28	28	28	19.891	0	31.774	108070000	12	Q99497	Q99497
COPS8	COP9 signalosome complex subunit 8	-4.85213	-3.9391	1	1	1	10	10	10	23.225	0	6.8837	21291000	2	Q99627	Q99627
HSD17B10	3-hydroxyacyl-CoA dehydrogenase type-2	-3.78934	-4.01373	2	2	2	10.7	10.7	10.7	26.923	0	12.6	13071000	2	Q99714	Q99714
CCT7	T-complex protein 1 subunit eta	2.338	2.30534	13	13	13	23.2	23.2	23.2	59.366	0	82.817	276730000	29	Q99832	Q99832
PRMT1	Protein arginine N-methyltransferase 1	-2.26803	-2.02449	2	2	2	6.7	6.7	6.7	42.461	0	12.713	9691100	3	Q99873	Q99873
HIST1H2BL;HIST1H2BA	Histone H2B type 1-L;Histone H2B type 1-A	5.11383	5.25895	9	9	0	55.6	55.6	0	13.952	0	138.15	11508000000	103	Q99880;Q96A08	Q99880;Q96A08
DPYSL5	Dihydropyrimidinase-related protein 5	3.79817	2.579	1	1	1	1.2	1.2	1.2	61.421	0	9.089	6714000000	26	Q9BPU6	Q9BPU6
ACAT2	Acetyl-CoA acetyltransferase, cytosolic	-0.938207	-1.0909	3	3	3	7.6	7.6	7.6	41.35	0	20.139	51100000	6	Q9BWD1	Q9BWD1
RAB1B;RAB8B;RAB8A;RAB10;RAB13;RAB1C;RAB15	Ras-related protein Rab-1B;Ras-related protein Rab-8B;Ras-related protein Rab-8A;Ras-related protein Rab-10;Ras-related protein Rab-13;Putative Ras-related protein Rab-1C;Ras-related protein Rab-15	-4.26242	-5.32856	2	1	1	10.4	5	5	22.171	0.0023697	6.3987	7777300	3	Q9H0U4;Q92930;P61006;P61026;P51153;Q92928;P59190	Q9H0U4;Q92930;P61006;P61026;P51153;Q92928;P59190
BCL11A	B-cell lymphoma/leukemia 11A	7.45317	7.20623	1	1	1	1.9	1.9	1.9	91.196	0	7.9348	56895000000	104	Q9H165	Q9H165
CPVL	Probable serine carboxypeptidase CPVL	-1.62229	0.974545	3	3	3	6.7	6.7	6.7	54.163	0	20.936	90562000	8	Q9H3G5	Q9H3G5
CENPH	Centromere protein H	1.30622	1.06909	1	1	1	5.3	5.3	5.3	28.481	1	-2	345470000	1	Q9H3R5	Q9H3R5
HN1L	Hematological and neurological expressed 1-like protein	-3.5894	-4.1373	1	1	1	7.4	7.4	7.4	20.063	0.0023474	6.3721	2731400	1	Q9H910	Q9H910
GLOD4	Glyoxalase domain-containing protein 4	-1.26544	-1.17053	1	1	1	3.5	3.5	3.5	34.793	0	6.6684	23504000	2	Q9HC38	Q9HC38
ENY2	Transcription and mRNA export factor ENY2	3.12327	1.85906	1	1	1	7.9	7.9	7.9	11.528	0.0024096	6.4499	193790000	4	Q9NPA8	Q9NPA8
EXOSC3	Exosome complex component RRP40	-6.36889	-6.48935	1	1	1	5.5	5.5	5.5	29.572	0	7.3016	2221100	1	Q9NQT5	Q9NQT5
MCM9	DNA helicase MCM9	-3.56231	-4.28005	1	1	1	0.7	0.7	0.7	127.31	0.0043956	6.1778	57907000	2	Q9NXL9	Q9NXL9
DPP3	Dipeptidyl peptidase 3	-3.74728	-3.43547	1	1	1	2.2	2.2	2.2	82.588	0	7.5511	8084200	2	Q9NY33	Q9NY33
IGF2BP1	Insulin-like growth factor 2 mRNA-binding protein 1	-5.63312	-4.13384	1	1	1	2.8	2.8	2.8	63.48	0	13.615	15375000	1	Q9NZI8	Q9NZI8
RCC2	Protein RCC2	-2.97375	-3.34057	1	1	1	2.9	2.9	2.9	56.084	0.0022272	6.2131	4043000	1	Q9P258	Q9P258
ZNF624	Zinc finger protein 624	2.54644	2.1174	1	1	1	1.6	1.6	1.6	99.928	0	6.7725	57512000	2	Q9P2J8	Q9P2J8
EIF3K	Eukaryotic translation initiation factor 3 subunit K	-0.160995	-0.605471	2	2	2	10.1	10.1	10.1	25.059	0	12.311	32993000	3	Q9UBQ5	Q9UBQ5
CTSZ	Cathepsin Z	-2.7661	0.30319	2	2	2	9.2	9.2	9.2	33.868	0	12.768	27260000	4	Q9UBR2	Q9UBR2
SLC25A10	Mitochondrial dicarboxylate carrier	-2.80461	-3.08456	1	1	1	3.8	3.8	3.8	31.282	0.0042017	6.0917	6864300	1	Q9UBX3	Q9UBX3
ZBTB47	Zinc finger and BTB domain-containing protein 47	2.97196	2.74875	1	1	1	2	2	2	82.759	0.0023148	6.3523	1211900000	8	Q9UFB7	Q9UFB7
PFDN2	Prefoldin subunit 2	-4.45507	-3.60577	1	1	1	9.1	9.1	9.1	16.648	0	9.5386	66885000	3	Q9UHV9	Q9UHV9
RALY	RNA-binding protein Raly	-0.310179	-1.62534	2	2	2	5.9	5.9	5.9	32.463	0	12.114	18046000	2	Q9UKM9	Q9UKM9
ZNF215	Zinc finger protein 215	5.75945	5.48498	1	1	1	2.9	2.9	2.9	60.034	0	11.393	93368000000	49	Q9UL58	Q9UL58
PA2G4	Proliferation-associated protein 2G4	0.588199	0.561749	3	3	3	8.6	8.6	8.6	43.786	0	33.687	77079000	7	Q9UQ80	Q9UQ80
RUVBL2	RuvB-like 2	-1.00122	-0.457558	3	3	3	7.1	7.1	7.1	51.156	0	24.412	35019000	11	Q9Y230	Q9Y230
PIN4	Peptidyl-prolyl cis-trans isomerase NIMA-interacting 4	1.54319	0.764729	2	2	2	16	16	16	13.81	0	12.436	85995000	3	Q9Y237	Q9Y237
EIF3L	Eukaryotic translation initiation factor 3 subunit L	-4.45857	-6.09278	1	1	1	3.5	3.5	3.5	66.726	0.0024213	6.4543	4172400	1	Q9Y262	Q9Y262
RUVBL1	RuvB-like 1	-4.72072	-4.40388	3	3	3	9.4	9.4	9.4	50.227	0	18.325	6708600	3	Q9Y265	Q9Y265
RTCB	tRNA-splicing ligase RtcB homolog	-3.14268	-2.75591	2	2	2	5.1	5.1	5.1	55.21	0	13.183	11445000	4	Q9Y3I0	Q9Y3I0
PSAT1	Phosphoserine aminotransferase	-1.55944	-1.09294	2	2	2	6.2	6.2	6.2	40.422	0	13.434	28754000	6	Q9Y617	Q9Y617
ENPP4	Bis(5-adenosyl)-triphosphatase ENPP4	-2.65713	1.37299	2	2	2	3.8	3.8	3.8	51.641	0	13.005	110300000	3	Q9Y6X5	Q9Y6X5

## Sheet: Fig. 4D data
Identified proteins in profile plot Fig. 4D (6Yn-Pro+H2O2+NRH vs DMSO+H2O2+NRH control)
Gene names	Protein names	DMSO+H2O2+NRH (Log2 intensity)	6Yn-Pro+H2O2+NRH (Log2 intensity)	Peptides	Razor + unique peptides	Unique peptides	Sequence coverage [%]	Unique + razor sequence coverage [%]	Unique sequence coverage [%]	Mol. weight [kDa]	Q-value	Score	Intensity	MS/MS count	Protein IDs	Majority protein IDs
CLIC1	Chloride intracellular channel protein 1	-1.02181	-0.910893	5	5	5	28.2	28.2	28.2	26.922	0	36.945	48597000	10	O00299	O00299
DDX3X;DDX3Y	ATP-dependent RNA helicase DDX3X;ATP-dependent RNA helicase DDX3Y	-2.28561	-1.45028	3	3	3	6.3	6.3	6.3	73.243	0	68.624	39953000	5	O00571;O15523	O00571;O15523
EIF1AX;EIF1AY	Eukaryotic translation initiation factor 1A, X-chromosomal;Eukaryotic translation initiation factor 1A, Y-chromosomal	-2.2007	-2.55617	2	2	2	11.8	11.8	11.8	16.46	0	12.337	27926000	4	P47813;O14602	P47813;O14602
PSMA7;PSMA8	Proteasome subunit alpha type-7;Proteasome subunit alpha type-7-like	0.178449	0.391931	3	3	3	13.3	13.3	13.3	27.887	0	23.409	259230000	8	O14818;Q8TAA3	O14818;Q8TAA3
MYL12B;MYL12A	Myosin regulatory light chain 12B;Myosin regulatory light chain 12A	-0.0949335	0.63506	1	1	1	5.8	5.8	5.8	19.779	0	63.798	100840000	5	O14950;P19105	O14950;P19105
HNRNPDL;SHROOM4	Heterogeneous nuclear ribonucleoprotein D-like;Protein Shroom4	1.34691	1.08815	2	2	2	3.6	3.6	3.6	46.437	0	84.056	137640000	5	O14979;Q9ULL8;REV__Q8N0S2;REV__Q9ULL8	O14979;Q9ULL8;REV__Q8N0S2;REV__Q9ULL8
SPTBN2	Spectrin beta chain, non-erythrocytic 2	0.394529	0.648101	1	1	1	0.3	0.3	0.3	271.32	0.0044346	6.1926	1160000000	5	O15020	O15020
EIF3H	Eukaryotic translation initiation factor 3 subunit H	-2.98046	-2.94559	1	1	1	5.4	5.4	5.4	39.93	0.0043103	6.1444	4165900	1	O15372	O15372
PHGDH	D-3-phosphoglycerate dehydrogenase	0.635818	1.15447	6	6	6	15.2	15.2	15.2	56.65	0	48.492	170830000	13	O43175	O43175
HIST1H2BH;HIST1H2BN;HIST1H2BC;HIST1H2BD;HIST1H2BK;HIST2H2BF;HIST1H2BM;H2BFS	Histone H2B type 1-H;Histone H2B type 1-N;Histone H2B type 1-C/E/F/G/I;Histone H2B type 1-D;Histone H2B type 1-K;Histone H2B type 2-F;Histone H2B type 1-M;Histone H2B type F-S	1.54133	1.60249	9	1	0	55.6	5.6	0	13.892	0	10.28	1186700000	8	Q93079;Q99877;P62807;P58876;O60814;Q5QNW6;Q99879;P57053	Q93079;Q99877;P62807;P58876;O60814;Q5QNW6;Q99879;P57053
DENND4B	DENN domain-containing protein 4B	-0.200858	-1.0787	1	1	1	0.5	0.5	0.5	163.84	1	-2	21957000	2	O75064	O75064
TBCA	Tubulin-specific chaperone A	-3.43723	-3.08225	1	1	1	10.2	10.2	10.2	12.855	0.0022831	6.2861	23181000	5	O75347	O75347
CS	Citrate synthase, mitochondrial	-2.35154	-2.19939	5	5	5	11.8	11.8	11.8	51.712	0	42.615	44233000	10	O75390	O75390
CSDE1	Cold shock domain-containing protein E1	-0.559472	-0.0946651	1	1	1	1.1	1.1	1.1	88.884	0	6.8823	107200000	2	O75534	O75534
ATP5H	ATP synthase subunit d, mitochondrial	3.48221	3.35219	4	4	4	26.1	26.1	26.1	18.491	0	142.29	434680000	12	O75947	O75947
UTS2	Urotensin-2	-2.20355	-0.921864	1	1	1	6.5	6.5	6.5	14.295	0	38.899	219020000	9	O95399	O95399
LDHA	L-lactate dehydrogenase A chain	2.5807	3.13289	10	10	9	26.8	26.8	23.2	36.688	0	323.31	505000000	31	P00338;P07864;Q6ZMR3	P00338
MT-CO2	Cytochrome c oxidase subunit 2	-2.15831	-2.11204	1	1	1	4.4	4.4	4.4	25.565	0	11.253	25518000	2	P00403	P00403
PGK1	Phosphoglycerate kinase 1	3.44297	3.90352	16	16	16	42.4	42.4	42.4	44.614	0	323.31	2548000000	56	P00558;P07205	P00558
PLAU	Urokinase-type plasminogen activator;Urokinase-type plasminogen activator long chain A;Urokinase-type plasminogen activator short chain A;Urokinase-type plasminogen activator chain B	2.82546	1.74407	1	1	1	2.3	2.3	2.3	48.507	0.0022422	6.2337	12497000000	11	P00749	P00749
LMNA;LMNB1;LMNB2	Prelamin-A/C;Lamin-A/C;Lamin-B1;Lamin-B2	-3.1516	-2.42871	2	2	2	2.7	2.7	2.7	74.139	0	12.687	29163000	3	P02545;P20700;Q03252	P02545;P20700;Q03252
APOC3	Apolipoprotein C-III	-0.544042	-0.784261	1	1	1	16.2	16.2	16.2	10.852	0	105.56	209840000	11	P02656	P02656
ALDOA	Fructose-bisphosphate aldolase A	3.99711	4.20866	16	16	15	46.2	46.2	44.2	39.42	0	180.9	1603400000	57	P04075;P05062	P04075
CSTB	Cystatin-B	-0.326798	-1.28772	1	1	1	12.2	12.2	12.2	11.139	0	7.8124	12451000	4	P04080	P04080
OAT	Ornithine aminotransferase, mitochondrial;Ornithine aminotransferase, hepatic form;Ornithine aminotransferase, renal form	-2.61506	-2.93545	2	2	2	5.9	5.9	5.9	48.534	0	12.433	6770900	3	P04181	P04181
GAPDH	Glyceraldehyde-3-phosphate dehydrogenase	4.86939	4.72714	13	13	13	46.6	46.6	46.6	36.053	0	242.11	4131300000	91	P04406	P04406
ATP1A1;ATP1A3	Sodium/potassium-transporting ATPase subunit alpha-1;Sodium/potassium-transporting ATPase subunit alpha-3	-4.93389	-4.75534	1	1	1	1.1	1.1	1.1	112.89	0	6.733	3271900	2	P05023;P13637	P05023;P13637
S100A8	Protein S100-A8;Protein S100-A8, N-terminally processed	-0.824194	-0.541405	3	3	3	32.3	32.3	32.3	10.834	0	18.929	49541000	5	P05109	P05109
SLC25A5;SLC25A4	ADP/ATP translocase 2;ADP/ATP translocase 2, N-terminally processed;ADP/ATP translocase 1	2.77223	3.41968	10	10	3	30.5	30.5	11.1	32.852	0	64.81	664480000	32	P05141;P12235;Q9H0C2	P05141;P12235
PCCA	Propionyl-CoA carboxylase alpha chain, mitochondrial	-2.33417	-2.26252	1	1	1	1.9	1.9	1.9	80.058	0	7.5266	34322000	4	P05165	P05165
EIF2S1	Eukaryotic translation initiation factor 2 subunit 1	-2.174	-1.56408	1	1	1	3.8	3.8	3.8	36.112	0	6.5656	13679000	3	P05198	P05198
RPLP0;RPLP0P6	60S acidic ribosomal protein P0;60S acidic ribosomal protein P0-like	-2.06591	-2.39142	4	4	4	21.1	21.1	21.1	34.273	0	28.948	26403000	4	P05388;Q8NHW5	P05388;Q8NHW5
SSB	Lupus La protein	1.24429	0.400864	2	2	2	4.7	4.7	4.7	46.836	0	12.486	31081000	2	P05455	P05455
ATP5G1;ATP5G3;ATP5G2	ATP synthase F(0) complex subunit C1, mitochondrial;ATP synthase F(0) complex subunit C3, mitochondrial;ATP synthase F(0) complex subunit C2, mitochondrial	0.741327	-0.634797	1	1	1	5.1	5.1	5.1	14.277	0.0042463	6.1199	47327000	4	P05496;P48201;Q06055	P05496;P48201;Q06055
S100A9	Protein S100-A9	0.0919809	-0.166128	1	1	1	11.4	11.4	11.4	13.242	0	8.883	18552000	4	P06702	P06702
ENO1	Alpha-enolase	-0.0403833	-0.0635419	5	5	5	15.9	15.9	15.9	47.168	0	56.248	284940000	13	P06733;P13929;P09104	P06733
GPI	Glucose-6-phosphate isomerase	-1.62851	-1.71024	6	6	5	10.9	10.9	9	63.146	0	34.739	50090000	8	P06744	P06744
NPM1	Nucleophosmin	4.11541	4.01183	7	7	7	21.1	21.1	21.1	32.575	0	47.498	654740000	13	P06748	P06748
HIST1H2BB;HIST2H2BE;HIST1H2BO;HIST1H2BJ	Histone H2B type 1-B;Histone H2B type 2-E;Histone H2B type 1-O;Histone H2B type 1-J	1.03322	0.833457	9	2	0	55.6	7.9	0	13.95	0	12.865	25256000	11	P33778;Q16778;P23527;P06899;Q6DRA6;Q6DN03	P33778;Q16778;P23527;P06899
LDHB	L-lactate dehydrogenase B chain	3.65492	3.77227	8	7	7	27.2	23.7	23.7	36.638	0	98.262	493090000	35	P07195	P07195
H1F0	Histone H1.0;Histone H1.0, N-terminally processed	3.30891	2.95607	6	6	6	27.8	27.8	27.8	20.863	0	60.919	727280000	28	P07305	P07305
TUBB	Tubulin beta chain	2.68637	2.99998	13	3	2	30.6	9.5	6.1	49.67	0	31.838	2620200000	34	P07437;A6NNZ2;Q9H4B7;CON__ENSEMBL:ENSBTAP00000025008	P07437
PFN1	Profilin-1	3.26308	3.00815	8	8	8	57.9	57.9	57.9	15.054	0	59.937	332690000	42	P07737;CON__P02584	P07737
APRT	Adenine phosphoribosyltransferase	-2.01467	-1.88485	3	3	3	17.8	17.8	17.8	19.608	0	64.11	26754000	7	P07741	P07741
HSP90AA1	Heat shock protein HSP 90-alpha	2.46194	2.78079	14	10	10	20.2	13.7	13.7	84.659	0	68.22	267450000	30	P07900;Q58FG1	P07900
HNRNPC	Heterogeneous nuclear ribonucleoproteins C1/C2	3.00121	1.99643	11	11	10	29.4	29.4	28.1	33.67	0	75.853	1652200000	36	P07910;O60812;B7ZW38;B2RXH8;P0DMR1;A0A0G2JPF8;A0A0G2JNQ3;Q86SE5	P07910
HSP90AB1	Heat shock protein HSP 90-beta	3.86146	4.12026	15	15	10	22.7	22.7	14.1	83.263	0	323.31	5006800000	86	P08238;Q58FF8;Q58FF7;Q14568	P08238
VIM	Vimentin	2.22624	3.05404	14	13	12	33.7	32.2	30.3	53.651	0	284.54	376730000	30	P08670;P41219;P17661	P08670
RPS17	40S ribosomal protein S17	0.432302	-0.789892	2	2	2	16.3	16.3	16.3	15.55	0	14.681	72801000	5	P08708	P08708
ANXA5	Annexin A5	0.475711	0.570244	8	8	8	25.6	25.6	25.6	35.936	0	55.288	231530000	16	P08758	P08758
RPSA	40S ribosomal protein SA	-0.0323486	-0.00668764	3	3	3	12.9	12.9	12.9	32.854	0	32.052	225110000	9	P08865	P08865
HMGB1;HMGB1P1	High mobility group protein B1;Putative high mobility group protein B1-like 1	0.071476	0.00112295	5	5	5	20	20	20	24.893	0	31.58	69947000	8	P09429;B2RPK0;P26583	P09429;B2RPK0
HNRNPA1;HNRNPA1L2	Heterogeneous nuclear ribonucleoprotein A1;Heterogeneous nuclear ribonucleoprotein A1, N-terminally processed;Heterogeneous nuclear ribonucleoprotein A1-like 2	3.25321	3.46788	6	6	5	19.1	19.1	17.2	38.746	0	323.31	823080000	24	P09651;Q32P51;A0A2R8Y4L2	P09651;Q32P51
PARP1	Poly [ADP-ribose] polymerase 1	1.31645	3.77921	15	15	14	14.5	14.5	13.6	113.08	0	99.352	408570000	27	P09874	P09874
UCHL1	Ubiquitin carboxyl-terminal hydrolase isozyme L1	-0.630426	-0.181524	4	4	4	17.9	17.9	17.9	24.824	0	24.646	50567000	7	P09936	P09936
HIST2H2AA3;HIST1H2AG;HIST1H2AJ;H2AFJ;HIST2H2AC;HIST1H2AH;HIST1H2AD;HIST1H2AC;HIST3H2A;HIST1H2AB;H2AFX;H2AFV;H2AFZ;HIST1H2AA	Histone H2A type 2-A;Histone H2A type 1;Histone H2A type 1-J;Histone H2A.J;Histone H2A type 2-C;Histone H2A type 1-H;Histone H2A type 1-D;Histone H2A type 1-C;Histone H2A type 3;Histone H2A type 1-B/E;Histone H2AX;Histone H2A.V;Histone H2A.Z;Histone H2A type 1-A	2.03422	2.11898	4	4	4	35.4	35.4	35.4	14.095	0	50.195	580170000	17	Q6FI13;P0C0S8;Q99878;Q9BTM1;Q16777;Q96KK5;P20671;Q93077;Q7L7L0;P04908;P16104;Q71UI9;P0C0S5;Q96QV6;Q8IUE6	Q6FI13;P0C0S8;Q99878;Q9BTM1;Q16777;Q96KK5;P20671;Q93077;Q7L7L0;P04908;P16104;Q71UI9;P0C0S5;Q96QV6
HSPA1A;HSPA1B;HSPA1L	Heat shock 70 kDa protein 1A;Heat shock 70 kDa protein 1B;Heat shock 70 kDa protein 1-like	5.31402	4.84395	20	19	10	35.3	34.2	21.5	70.051	0	323.31	8255500000	131	P0DMV8;P0DMV9;P34931	P0DMV8;P0DMV9;P34931
HIST1H1E	Histone H1.4	8.52865	7.93103	25	25	8	58.9	58.9	21.5	21.865	0	323.31	60490000000	344	P10412	P10412
CTSA	Lysosomal protective protein;Lysosomal protective protein 32 kDa chain;Lysosomal protective protein 20 kDa chain	-2.05955	2.95887	1	1	1	1.5	1.5	1.5	54.465	0.0043478	6.1476	80570000	3	P10619	P10619
HSPD1	60 kDa heat shock protein, mitochondrial	3.34624	3.48226	15	15	15	28.6	28.6	28.6	61.054	0	270.66	1554500000	53	P10809	P10809
HSPA5	78 kDa glucose-regulated protein	2.82216	3.29492	22	22	21	36.9	36.9	35.8	72.332	0	323.31	7492900000	92	P11021	P11021
HSPA8	Heat shock cognate 71 kDa protein	2.79429	2.24421	19	15	15	31.6	27.1	27.1	70.897	0	141.53	1150500000	45	P11142;P54652	P11142
MTHFD1	C-1-tetrahydrofolate synthase, cytoplasmic;Methylenetetrahydrofolate dehydrogenase;Methenyltetrahydrofolate cyclohydrolase;Formyltetrahydrofolate synthetase;C-1-tetrahydrofolate synthase, cytoplasmic, N-terminally processed	-2.6654	-2.79412	2	2	2	2.1	2.1	2.1	101.56	0	11.579	12569000	4	P11586	P11586
PABPC1	Polyadenylate-binding protein 1	-0.794806	-1.23518	3	3	3	5.7	5.7	5.7	70.67	0	17.896	31898000	6	P11940;Q13310;Q9H361	P11940
PCNA	Proliferating cell nuclear antigen	-0.681356	-0.75391	3	3	3	15.3	15.3	15.3	28.768	0	34.503	51641000	4	P12004	P12004
SLC25A6	ADP/ATP translocase 3;ADP/ATP translocase 3, N-terminally processed	-1.45217	-0.987909	8	1	1	22.5	3	3	32.866	0.0024631	6.5002	27622000	6	P12236	P12236
IMPDH2	Inosine-5-monophosphate dehydrogenase 2	-2.05001	-1.87628	2	2	2	4.9	4.9	4.9	55.804	0	22.127	33830000	4	P12268	P12268
CKB	Creatine kinase B-type	3.01657	3.38	10	10	10	31.5	31.5	31.5	42.644	0	280.49	1744900000	51	P12277;P06732	P12277
EEF2	Elongation factor 2	3.90698	4.25258	21	21	21	26.6	26.6	26.6	95.337	0	268.51	1331300000	60	P13639;Q15029	P13639
PLS3;LCP1	Plastin-3;Plastin-2	0.772596	0.435568	4	4	4	7.8	7.8	7.8	70.81	0	28.009	50928000	5	P13797;P13796;Q14651	P13797;P13796
MIF	Macrophage migration inhibitory factor	1.15282	4.70624	5	5	5	47.8	47.8	47.8	12.476	0	61.746	7194200000	29	P14174	P14174
PKM	Pyruvate kinase PKM	3.6293	4.04614	18	18	17	46.5	46.5	40.7	57.936	0	323.31	2704300000	67	P14618;P30613	P14618
HSP90B1	Endoplasmin	1.47449	2.04708	10	9	9	13.4	11.7	11.7	92.468	0	57.74	233080000	31	P14625;Q58FF3	P14625
HNRNPL	Heterogeneous nuclear ribonucleoprotein L	0.428328	0.516119	7	7	7	12.4	12.4	12.4	64.132	0	46.019	238180000	12	P14866;Q8WVV9	P14866
JUP	Junction plakoglobin	-0.246267	-0.114552	5	5	5	7.7	7.7	7.7	81.744	0	44.334	47539000	5	P14923	P14923
RPS2	40S ribosomal protein S2	2.86375	2.62387	7	7	7	25.9	25.9	25.9	31.324	0	49.256	243000000	25	P15880	P15880
DSP	Desmoplakin	1.28378	1.65458	13	13	13	4.8	4.8	4.8	331.77	0	142.9	148140000	18	P15924	P15924
CBR1	Carbonyl reductase [NADPH] 1	-2.2079	-1.69634	5	5	5	24.5	24.5	24.5	30.375	0	59.664	96946000	8	P16152;O75828	P16152
HIST1H1D	Histone H1.3	5.63475	4.72294	24	8	8	58.4	25.3	25.3	22.35	0	65.981	3718800000	41	P16402;REV__P16402	P16402
HIST1H1C	Histone H1.2	5.92767	5.28899	23	8	8	57.3	22.1	22.1	21.364	0	105.02	7130300000	73	P16403;Q02539;P16401;P22492	P16403
PCSK2	Neuroendocrine convertase 2	2.16911	1.30188	1	1	1	1.6	1.6	1.6	70.564	0.0042105	6.1097	58017000000	6	P16519	P16519
HSPA6;HSPA7	Heat shock 70 kDa protein 6;Putative heat shock 70 kDa protein 7	1.20614	1.21991	10	1	1	14.3	1.7	1.7	71.027	0	249.75	427000000	16	P17066;P48741	P17066;P48741
DDX5	Probable ATP-dependent RNA helicase DDX5	-0.366978	-0.274748	5	5	3	9.1	9.1	5.4	69.147	0	32.065	219220000	10	P17844	P17844
PFKL	ATP-dependent 6-phosphofructokinase, liver type	0.675885	1.88137	12	11	10	19.9	17.4	16.3	85.018	0	117.61	590350000	26	P17858	P17858
PSMC3	26S protease regulatory subunit 6A	-1.15856	-0.716783	1	1	1	1.6	1.6	1.6	49.203	0.0083682	6.0888	31218000	2	P17980	P17980
TCP1	T-complex protein 1 subunit alpha	1.40877	1.79605	10	10	10	19.4	19.4	19.4	60.343	0	65.563	212190000	23	P17987	P17987
RPL35A	60S ribosomal protein L35a	1.05285	0.0305257	4	4	4	32.7	32.7	32.7	12.538	0	23.681	65323000	6	P18077	P18077
RPL7	60S ribosomal protein L7	0.706863	0.625499	6	6	6	28.6	28.6	28.6	29.225	0	151.95	518160000	12	P18124	P18124
NCL	Nucleolin	2.54763	2.16888	8	8	8	8.2	8.2	8.2	76.613	0	54.099	324770000	14	P19338	P19338
RAB6A;RAB6B;RAB39A	Ras-related protein Rab-6A;Ras-related protein Rab-6B;Ras-related protein Rab-39A	-1.11189	-0.843791	1	1	1	5.3	5.3	5.3	23.593	0.0022936	6.3078	43970000	3	P20340;Q9NRW1;Q14964	P20340;Q9NRW1;Q14964
FLNA	Filamin-A	1.35926	1.487	21	21	21	11.4	11.4	11.4	280.74	0	201.49	357200000	45	P21333	P21333
UBA1	Ubiquitin-like modifier-activating enzyme 1	0.0603018	0.297693	9	9	9	10.1	10.1	10.1	117.85	0	68.195	569590000	20	P22314	P22314
NME2;NME1;NME2P1	Nucleoside diphosphate kinase B;Nucleoside diphosphate kinase A;Putative nucleoside diphosphate kinase	2.88563	2.49267	8	8	8	46.7	46.7	46.7	17.298	0	64.929	478270000	25	P22392;P15531;O60361	P22392;P15531;O60361
SPRR2B;SPRR2D;SPRR2E;SPRR2A;SPRR2G;SPRR2F	Small proline-rich protein 2B;Small proline-rich protein 2D;Small proline-rich protein 2E;Small proline-rich protein 2A;Small proline-rich protein 2G;Small proline-rich protein 2F	-1.45812	-1.11813	3	3	3	54.2	54.2	54.2	7.9754	0	17.188	22239000	3	P35325;P22532;P22531;P35326;Q9BYE4;Q96RM1	P35325;P22532;P22531;P35326;Q9BYE4;Q96RM1
HNRNPA2B1	Heterogeneous nuclear ribonucleoproteins A2/B1	3.69866	3.99941	14	14	14	52.7	52.7	52.7	37.429	0	323.31	1594200000	45	P22626	P22626
SFPQ	Splicing factor, proline- and glutamine-rich	-1.37029	-1.21204	4	3	3	5.4	4.2	4.2	76.149	0	17.869	17826000	3	P23246	P23246
PPIB	Peptidyl-prolyl cis-trans isomerase B	-3.22863	-2.97385	2	2	2	12	12	12	23.742	0	26.344	77814000	5	P23284	P23284
RPS3	40S ribosomal protein S3	1.57535	1.1975	7	7	7	30.5	30.5	30.5	26.688	0	47.449	190510000	10	P23396	P23396
AHCY	Adenosylhomocysteinase	0.7615	1.29231	6	6	6	14.1	14.1	14.1	47.716	0	48.855	173770000	14	P23526	P23526
CFL1	Cofilin-1	0.848356	0.646752	4	4	4	28.3	28.3	28.3	18.502	0	27.814	190460000	12	P23528;Q9Y281	P23528
ATP5A1	ATP synthase subunit alpha, mitochondrial	-3.66401	-3.03275	7	7	7	17	17	17	59.75	0	68.597	241920000	14	P25705	P25705
MSN;EZR;RDX	Moesin;Ezrin;Radixin	-2.08803	-1.78217	3	3	3	5.9	5.9	5.9	67.819	0	18.589	32321000	3	P26038;P15311;P35241	P26038;P15311;P35241
RPL13	60S ribosomal protein L13	1.22114	1.02222	5	5	5	25.1	25.1	25.1	24.261	0	34.025	253590000	14	P26373	P26373
PTBP1	Polypyrimidine tract-binding protein 1	-0.0740156	0.336611	6	6	4	13.6	13.6	10.9	57.221	0	46.474	68050000	8	P26599;O95758	P26599
TARS;TARSL2	Threonine--tRNA ligase, cytoplasmic;Probable threonine--tRNA ligase 2, cytoplasmic	-2.25065	-3.23982	2	2	2	3	3	3	83.434	0	13.513	27568000	4	P26639;A2RTX5	P26639;A2RTX5
VARS	Valine--tRNA ligase	-2.3537	-2.19654	3	3	3	3.3	3.3	3.3	140.47	0	17.829	11520000	4	P26640	P26640
EEF1G	Elongation factor 1-gamma	1.95357	2.10563	6	6	6	15.1	15.1	15.1	50.118	0	84.52	254220000	27	P26641	P26641
YWHAQ	14-3-3 protein theta	-1.48441	-1.99424	6	3	2	28.6	18.8	15.1	27.764	0	81.004	50923000	5	P27348	P27348
CALR	Calreticulin	-0.278312	-0.104148	4	4	4	8.9	8.9	8.9	48.141	0	86.859	65955000	6	P27797	P27797
PSMA5	Proteasome subunit alpha type-5	0.567286	0.568285	2	2	2	9.5	9.5	9.5	26.411	0	21.587	122730000	5	P28066	P28066
PSMB5	Proteasome subunit beta type-5	-0.753643	-1.10066	6	6	6	27.8	27.8	27.8	28.48	0	39.992	47808000	10	P28074	P28074
TKT	Transketolase	0.71633	1.15256	7	7	7	12.8	12.8	12.8	67.877	0	62.14	349270000	13	P29401	P29401
SERPINB3;SERPINB4	Serpin B3;Serpin B4	-3.78769	-3.17323	2	2	2	7.4	7.4	7.4	44.564	0	12.887	7479300	2	P29508;P48594	P29508;P48594
EEF1D	Elongation factor 1-delta	-4.68818	-4.34283	3	3	2	14.9	14.9	11.7	31.121	0	56.052	19947000	3	P29692	P29692
ERP29	Endoplasmic reticulum resident protein 29	-4.45805	-3.79932	1	1	1	4.6	4.6	4.6	28.993	0.0022523	6.2408	3005900	2	P30040	P30040
RPL12	60S ribosomal protein L12	0.547947	0.235759	5	5	5	33.9	33.9	33.9	17.818	0	40.781	271390000	9	P30050	P30050
ECHS1	Enoyl-CoA hydratase, mitochondrial	-4.97403	-5.70698	1	1	1	7.2	7.2	7.2	31.387	0	8.307	8216500	3	P30084	P30084
PDIA3	Protein disulfide-isomerase A3	0.353649	0.407255	7	7	7	16.8	16.8	16.8	56.782	0	44.084	74451000	12	P30101	P30101
PPP2R1A	Serine/threonine-protein phosphatase 2A 65 kDa regulatory subunit A alpha isoform	-3.89324	-2.64445	1	1	1	2.2	2.2	2.2	65.308	0.0022989	6.3172	11126000	2	P30153	P30153
NMT1	Glycylpeptide N-tetradecanoyltransferase 1	-4.25201	-3.70873	2	2	2	4.8	4.8	4.8	56.806	0	12.603	4363800	4	P30419	P30419
S100A7A;S100A7	Protein S100-A7A;Protein S100-A7	-0.991654	-0.57221	1	1	1	10.9	10.9	10.9	11.305	0.0042373	6.1154	79291000	3	Q86SG5;P31151	Q86SG5;P31151
HNRNPH1	Heterogeneous nuclear ribonucleoprotein H;Heterogeneous nuclear ribonucleoprotein H, N-terminally processed	0.549104	0.941557	9	9	7	23.2	23.2	17.1	49.229	0	86.333	252980000	22	P31943;P55795	P31943
SFN	14-3-3 protein sigma	2.24687	1.78957	3	1	1	9.3	3.2	3.2	27.774	0	16.661	83829000	8	P31947	P31947
PRDX2	Peroxiredoxin-2	2.73759	2.42527	5	4	4	24.2	18.7	18.7	21.892	0	24.503	186270000	11	P32119	P32119
RPL9	60S ribosomal protein L9	0.289954	0.543843	2	2	2	9.4	9.4	9.4	21.863	0	30.355	90593000	7	P32969	P32969
DUT	Deoxyuridine 5-triphosphate nucleotidohydrolase, mitochondrial	0.147868	-0.205135	2	2	2	7.1	7.1	7.1	26.563	0	14.164	110000000	5	P33316	P33316
SHMT2	Serine hydroxymethyltransferase, mitochondrial	-1.2247	-0.109413	2	2	2	4.8	4.8	4.8	55.992	0	13.767	27865000	7	P34897	P34897
HSPA4;HSPH1;HSPA4L	Heat shock 70 kDa protein 4;Heat shock protein 105 kDa;Heat shock 70 kDa protein 4L	-1.31262	-1.31478	2	2	2	2.5	2.5	2.5	94.33	0	13.653	25041000	5	P34932;Q92598;O95757	P34932;Q92598;O95757
PHB	Prohibitin	0.015975	0.508058	2	2	2	7	7	7	29.804	0	11.552	50397000	2	P35232	P35232
RPL22	60S ribosomal protein L22	2.57417	1.27587	4	4	4	40.6	40.6	40.6	14.787	0	174.84	183850000	18	P35268	P35268
RPL4	60S ribosomal protein L4	2.70719	2.86381	8	8	8	19.9	19.9	19.9	47.697	0	222.15	210440000	22	P36578	P36578
TAGLN2	Transgelin-2	1.63926	1.6325	8	8	8	42.7	42.7	42.7	22.391	0	55.774	680430000	38	P37802;Q9UI15	P37802
TALDO1	Transaldolase	-1.68842	-1.96264	5	5	5	13.9	13.9	13.9	37.54	0	31.436	100230000	9	P37837	P37837
HSPA9	Stress-70 protein, mitochondrial	1.15098	1.47655	8	8	8	15.3	15.3	15.3	73.68	0	182.09	542000000	27	P38646	P38646
EIF4A3	Eukaryotic initiation factor 4A-III;Eukaryotic initiation factor 4A-III, N-terminally processed	-3.13195	-3.88922	4	3	3	14.1	10.2	10.2	46.871	0	20.927	67994000	4	P38919	P38919
RPL3	60S ribosomal protein L3	2.96898	3.24883	8	8	8	15.1	15.1	15.1	46.108	0	52.216	461430000	20	P39023;Q92901	P39023
CCT6A	T-complex protein 1 subunit zeta	-0.617808	-0.0578923	6	6	6	12.4	12.4	12.4	58.024	0	46.123	241640000	14	P40227;Q92526	P40227
RPL13A	60S ribosomal protein L13a	1.34035	0.271334	5	5	5	21.7	21.7	21.7	23.577	0	34.922	176270000	21	P40429;Q6NVV1	P40429
MDH1	Malate dehydrogenase, cytoplasmic	1.08953	1.27958	4	4	4	13.5	13.5	13.5	36.426	0	36.569	173800000	12	P40925	P40925
MDH2	Malate dehydrogenase, mitochondrial	0.071744	0.295219	7	7	7	26.3	26.3	26.3	35.503	0	61.283	248690000	21	P40926	P40926
EIF2S3;EIF2S3L	Eukaryotic translation initiation factor 2 subunit 3;Putative eukaryotic translation initiation factor 2 subunit 3-like protein	-0.914352	-0.63414	3	3	2	7.6	7.6	4.2	51.109	0	17.416	61548000	7	P41091;Q2VIR3	P41091;Q2VIR3
TMPO	Lamina-associated polypeptide 2, isoform alpha;Thymopoietin;Thymopentin	-1.45479	-1.66178	2	2	2	4.2	4.2	4.2	75.491	0	19.336	21327000	5	P42166	P42166
RPS27;RPS27L	40S ribosomal protein S27;40S ribosomal protein S27-like	0.218966	-0.142864	2	2	2	25	25	25	9.461	0	14.212	84590000	5	P42677;Q71UM5	P42677;Q71UM5
CDKN2A	Cyclin-dependent kinase inhibitor 2A	-3.35111	-3.88372	1	1	1	10.9	10.9	10.9	16.532	0	22.876	15306000	2	P42771	P42771
MATR3	Matrin-3	-1.45804	-1.48958	5	5	5	8.1	8.1	8.1	94.622	0	37.875	47549000	6	P43243	P43243
VDAC2	Voltage-dependent anion-selective channel protein 2	0.4686	0.705133	6	6	6	24.1	24.1	24.1	31.566	0	38.275	62253000	9	P45880	P45880
RANGAP1	Ran GTPase-activating protein 1	-2.63147	-2.70571	2	2	2	4.4	4.4	4.4	63.541	0	13.712	8123800	3	P46060	P46060
RPL5	60S ribosomal protein L5	0.453346	0.523031	4	4	4	14.8	14.8	14.8	34.362	0	28.878	100930000	8	P46777	P46777
RPL21	60S ribosomal protein L21	-1.97585	-4.11136	3	3	3	20.6	20.6	20.6	18.565	0	17.696	134840000	4	P46778	P46778
RPL28	60S ribosomal protein L28	1.88746	1.34979	10	10	9	52.6	52.6	45.3	15.747	0	67.068	364130000	20	P46779	P46779
RPS9	40S ribosomal protein S9	1.65831	1.18169	6	6	6	25.8	25.8	25.8	22.591	0	35.508	214770000	10	P46781	P46781
RPS5	40S ribosomal protein S5;40S ribosomal protein S5, N-terminally processed	-0.40887	-0.441424	3	3	3	18.1	18.1	18.1	22.876	0	19.255	56441000	9	P46782	P46782
RPL29	60S ribosomal protein L29	0.954186	1.35543	3	3	3	15.1	15.1	15.1	17.752	0	24.33	167150000	7	P47914	P47914
LGALS7	Galectin-7	0.0611124	0.0905719	3	3	3	27.2	27.2	27.2	15.075	0	19.959	29420000	4	P47929	P47929
ATP5O	ATP synthase subunit O, mitochondrial	3.37627	3.76432	5	5	5	25.4	25.4	25.4	23.277	0	69.262	168880000	32	P48047	P48047
ARCN1	Coatomer subunit delta	-1.7139	-2.00073	2	2	2	5.1	5.1	5.1	57.21	0	11.596	7117200	2	P48444	P48444
CCT5	T-complex protein 1 subunit epsilon	-1.39624	-1.12351	5	5	5	10.2	10.2	10.2	59.67	0	30.076	82915000	12	P48643	P48643
RPL34	60S ribosomal protein L34	4.50777	3.9723	6	6	6	41.9	41.9	41.9	13.293	0	47.776	368700000	12	P49207	P49207
NASP	Nuclear autoantigenic sperm protein	-0.317795	-0.368399	4	4	4	8.2	8.2	8.2	85.237	0	32.511	67607000	8	P49321	P49321
FASN	Fatty acid synthase;[Acyl-carrier-protein] S-acetyltransferase;[Acyl-carrier-protein] S-malonyltransferase;3-oxoacyl-[acyl-carrier-protein] synthase;3-oxoacyl-[acyl-carrier-protein] reductase;3-hydroxyacyl-[acyl-carrier-protein] dehydratase;Enoyl-[acyl-carrier-protein] reductase;Oleoyl-[acyl-carrier-protein] hydrolase	0	0.0347877	13	13	12	5.9	5.9	5.4	273.42	0	78.527	172820000	16	P49327	P49327
CCT3	T-complex protein 1 subunit gamma	1.43475	1.80368	8	8	8	15	15	15	60.533	0	58.234	254660000	24	P49368	P49368
TUFM	Elongation factor Tu, mitochondrial	1.22754	1.33268	9	9	9	24.3	24.3	24.3	49.541	0	72.645	130450000	18	P49411	P49411
SARS	Serine--tRNA ligase, cytoplasmic	-4.89287	-3.76271	1	1	1	1.6	1.6	1.6	58.777	0.0022779	6.2827	2120000	1	P49591	P49591
HINT1	Histidine triad nucleotide-binding protein 1	1.20791	1.39203	1	1	1	11.1	11.1	11.1	13.802	0	9.7333	83072000	4	P49773	P49773
GMPS	GMP synthase [glutamine-hydrolyzing]	-2.67491	-2.71167	1	1	1	1.6	1.6	1.6	76.715	0.0024155	6.4526	12682000	3	P49915	P49915
GDI2;GDI1	Rab GDP dissociation inhibitor beta;Rab GDP dissociation inhibitor alpha	-1.10348	-0.497433	4	4	4	10.3	10.3	10.3	50.663	0	39.7	59078000	11	P50395;P31150	P50395;P31150
SERPINH1	Serpin H1	0.955059	0.428419	4	4	4	10	10	10	46.44	0	26.983	53580000	6	P50454	P50454
RPL14	60S ribosomal protein L14	1.38382	1.40681	3	3	3	16.3	16.3	16.3	23.432	0	21.861	169350000	20	P50914	P50914
CCT8	T-complex protein 1 subunit theta	1.07127	1.4092	8	8	8	16.4	16.4	16.4	59.62	0	112.33	314950000	19	P50990	P50990
CCT4	T-complex protein 1 subunit delta	1.02639	1.4156	8	8	8	16	16	16	57.924	0	244.25	524350000	22	P50991	P50991
RAB5C	Ras-related protein Rab-5C	-2.61187	-2.55959	4	4	4	25.9	25.9	25.9	23.482	0	25.609	70734000	7	P51148;P20339;P61020	P51148
RAB7A	Ras-related protein Rab-7a	-2.7574	-3.41363	2	2	2	12.1	12.1	12.1	23.489	0	20.959	60116000	6	P51149	P51149
HNRNPA3	Heterogeneous nuclear ribonucleoprotein A3	0.846085	1.2942	3	2	2	9.5	7.7	7.7	39.594	0	28.188	196320000	5	P51991	P51991
PGD	6-phosphogluconate dehydrogenase, decarboxylating	0.756588	0.729322	3	3	3	6.8	6.8	6.8	53.139	0	54.183	68514000	10	P52209	P52209
HNRNPM	Heterogeneous nuclear ribonucleoprotein M	1.74394	1.92471	9	9	9	15.3	15.3	15.3	77.515	0	89.529	256880000	21	P52272	P52272
KPNA2	Importin subunit alpha-1	-2.29519	-1.95309	3	3	3	7.8	7.8	7.8	57.861	0	49.361	68604000	9	P52292	P52292
POLR2H	DNA-directed RNA polymerases I, II, and III subunit RPABC3	-3.8889	-3.57556	1	1	1	10.7	10.7	10.7	17.143	0	8.9252	16895000	3	P52434	P52434
HNRNPF	Heterogeneous nuclear ribonucleoprotein F;Heterogeneous nuclear ribonucleoprotein F, N-terminally processed	-4.33558	-4.30997	4	2	2	13.5	7	7	45.671	0	12.856	18283000	4	P52597	P52597
CTSC	Dipeptidyl peptidase 1;Dipeptidyl peptidase 1 exclusion domain chain;Dipeptidyl peptidase 1 heavy chain;Dipeptidyl peptidase 1 light chain	-1.45163	-0.421309	1	1	1	2.6	2.6	2.6	51.853	0	7.2873	19264000	5	P53634	P53634
VCP	Transitional endoplasmic reticulum ATPase	-0.0227251	0.341938	4	4	4	6.6	6.6	6.6	89.321	0	29.107	90963000	6	P55072	P55072
MARS	Methionine--tRNA ligase, cytoplasmic	-1.19201	-0.777315	1	1	1	2.4	2.4	2.4	101.11	0	11.941	46174000	1	P56192	P56192
TPI1	Triosephosphate isomerase	5.57431	5.23851	16	16	16	71.5	71.5	71.5	26.669	0	293.7	2814300000	101	P60174	P60174
MYL6;MYL6B	Myosin light polypeptide 6;Myosin light chain 6B	-0.486505	-1.40067	2	2	2	13.9	13.9	13.9	16.93	0	13.615	19413000	2	P60660;P14649	P60660;P14649
ACTB;ACTA1;ACTA2;ACTG2;ACTC1	Actin, cytoplasmic 1;Actin, cytoplasmic 1, N-terminally processed;Actin, alpha skeletal muscle;Actin, aortic smooth muscle;Actin, gamma-enteric smooth muscle;Actin, alpha cardiac muscle 1	5.34589	5.45242	23	23	1	62.9	62.9	4.5	41.736	0	323.31	14945000000	151	P60709;P68133;P62736;P63267;P68032;Q562R1;Q6S8J3;A5A3E0;P0CG38;P0CG39;Q9BYX7	P60709;P68133;P62736;P63267;P68032
EIF4A1;EIF4A2	Eukaryotic initiation factor 4A-I;Eukaryotic initiation factor 4A-II;Eukaryotic initiation factor 4A-II, N-terminally processed	2.64118	2.84962	7	7	6	19.7	19.7	15.8	46.153	0	287.28	988330000	31	P60842;Q14240	P60842;Q14240
RPS20	40S ribosomal protein S20	-0.111904	-0.0356469	5	5	5	36.1	36.1	36.1	13.373	0	40.791	394620000	15	P60866	P60866
PSMA6	Proteasome subunit alpha type-6	-0.943786	-0.442214	4	4	4	19.1	19.1	19.1	27.399	0	26.361	37265000	5	P60900	P60900
CDC42	Cell division control protein 42 homolog	-0.5291	-0.976659	1	1	1	5.8	5.8	5.8	21.258	0	6.693	16487000	2	P60953	P60953
DSTN	Destrin	-5.12728	-5.62743	1	1	1	7.3	7.3	7.3	18.506	0	7.0002	16949000	4	P60981	P60981
UBE2M	NEDD8-conjugating enzyme Ubc12	-0.320221	0.3167	2	2	2	10.4	10.4	10.4	20.9	0	11.57	21006000	3	P61081	P61081
RPS3A	40S ribosomal protein S3a	-0.241179	-0.00112295	8	8	8	30.3	30.3	30.3	29.945	0	53.307	250870000	13	P61247	P61247
RPL26;RPL26L1	60S ribosomal protein L26;60S ribosomal protein L26-like 1	-0.313866	-0.588527	2	2	2	16.6	16.6	16.6	17.258	0	13.22	21610000	2	P61254;Q9UNX3	P61254;Q9UNX3
RPL15	60S ribosomal protein L15	2.02365	1.93335	6	6	6	28.9	28.9	28.9	24.146	0	52.711	275640000	12	P61313	P61313
RPL37A	60S ribosomal protein L37a	0.978206	-0.296878	4	4	4	50	50	50	10.275	0	35.691	62459000	8	P61513;A6NKH3	P61513
LYZ	Lysozyme C	0.890242	1.46606	1	1	1	6.1	6.1	6.1	16.537	0	50.761	88960000	1	P61626	P61626
RPL37	60S ribosomal protein L37	1.64292	1.42508	5	5	5	33	33	33	11.078	0	33.26	755330000	11	P61927	P61927
SUMO2;SUMO3;SUMO4	Small ubiquitin-related modifier 2;Small ubiquitin-related modifier 3;Small ubiquitin-related modifier 4	0.781641	0.660693	2	2	2	23.2	23.2	23.2	10.871	0	13.518	66562000	14	P61956;P55854;Q6EEV6	P61956;P55854;Q6EEV6
HNRNPK	Heterogeneous nuclear ribonucleoprotein K	-0.411773	0.116031	7	7	7	14.5	14.5	14.5	50.976	0	58.006	146720000	12	P61978	P61978
PSMC5;SPATA5	26S protease regulatory subunit 8;Spermatogenesis-associated protein 5	-3.29554	-2.91169	1	1	1	3	3	3	45.626	0.004329	6.1458	2014900	1	P62195;Q8NB90	P62195;Q8NB90
RPS8	40S ribosomal protein S8	2.92558	2.61277	9	9	9	45.2	45.2	45.2	24.205	0	95.927	1440900000	30	P62241	P62241
RPS16	40S ribosomal protein S16	2.44873	2.14243	7	7	7	45.9	45.9	45.9	16.445	0	50.051	179990000	21	P62249	P62249
YWHAE	14-3-3 protein epsilon	2.18692	2.0451	8	6	6	36.1	30.2	30.2	29.174	0	121.19	360940000	54	P62258	P62258
RPS14	40S ribosomal protein S14	2.35163	1.36058	9	9	9	41.7	41.7	41.7	16.273	0	159.47	663960000	26	P62263	P62263
RPS23	40S ribosomal protein S23	2.41502	1.72585	2	2	2	13.3	13.3	13.3	15.807	0	13.55	111540000	13	P62266	P62266
RPS29	40S ribosomal protein S29	-2.07336	-2.44509	1	1	1	19.6	19.6	19.6	6.6767	0	7.5987	27029000	4	P62273	P62273
RPS11	40S ribosomal protein S11	0.752913	0.237217	7	7	7	38.6	38.6	38.6	18.431	0	43.607	66314000	8	P62280	P62280
SNRPD2	Small nuclear ribonucleoprotein Sm D2	0.199218	-0.274908	1	1	1	5.9	5.9	5.9	13.527	0.0022624	6.2553	13095000	1	P62316	P62316
PSMC6	26S protease regulatory subunit 10B	-3.15926	-3.10401	2	2	2	6.9	6.9	6.9	44.172	0	13.635	3064300	3	P62333	P62333
RPL7A	60S ribosomal protein L7a	2.99134	1.9954	12	12	12	41.7	41.7	41.7	29.995	0	122.08	521710000	30	P62424	P62424
RPS4X;RPS4Y1;RPS4Y2	40S ribosomal protein S4, X isoform;40S ribosomal protein S4, Y isoform 1;40S ribosomal protein S4, Y isoform 2	0.644588	0.873238	6	6	6	26.6	26.6	26.6	29.597	0	43.863	171440000	19	P62701;P22090;Q8TD47	P62701;P22090;Q8TD47
RPS6	40S ribosomal protein S6	0.789245	1.15784	3	3	3	12.9	12.9	12.9	28.68	0	22.952	131250000	7	P62753	P62753
HIST1H4A	Histone H4	5.57517	5.11939	10	10	10	58.3	58.3	58.3	11.367	0	154.15	4355700000	86	P62805	P62805
RAN	GTP-binding nuclear protein Ran	0.614071	-0.27339	7	7	7	30.1	30.1	30.1	24.423	0	106.23	293260000	24	P62826	P62826
RPL23	60S ribosomal protein L23	0.309417	0.538304	4	4	4	33.6	33.6	33.6	14.865	0	28.135	47861000	7	P62829	P62829
RPS24	40S ribosomal protein S24	2.16349	1.27914	3	3	3	19.5	19.5	19.5	15.423	0	20.095	72622000	7	P62847	P62847
RPS25	40S ribosomal protein S25	1.15763	1.13601	3	3	3	20.8	20.8	20.8	13.742	0	20.672	149930000	12	P62851	P62851
RPS26;RPS26P11	40S ribosomal protein S26;Putative 40S ribosomal protein S26-like 1	1.46488	0.414509	2	2	2	20.9	20.9	20.9	13.015	0	16.059	137550000	7	P62854;Q5JNZ5	P62854;Q5JNZ5
RPS28	40S ribosomal protein S28	-2.58795	-2.49799	2	2	2	23.2	23.2	23.2	7.8409	0	12.502	45889000	2	P62857	P62857
GNB2;GNB1;GNB4;GNB3	Guanine nucleotide-binding protein G(I)/G(S)/G(T) subunit beta-2;Guanine nucleotide-binding protein G(I)/G(S)/G(T) subunit beta-1;Guanine nucleotide-binding protein subunit beta-4;Guanine nucleotide-binding protein G(I)/G(S)/G(T) subunit beta-3	-2.1531	-1.81647	2	2	2	5.9	5.9	5.9	37.331	0	12.634	46677000	3	P62879;P62873;Q9HAV0;P16520	P62879;P62873;Q9HAV0;P16520
RPL30	60S ribosomal protein L30	0.865474	0.674169	4	4	4	32.2	32.2	32.2	12.784	0	28.266	391730000	9	P62888	P62888
RPL32	60S ribosomal protein L32	3.34887	3.00773	6	6	6	38.5	38.5	38.5	15.86	0	61.179	2493000000	26	P62910	P62910
RPL11	60S ribosomal protein L11	-0.189034	-0.491682	3	3	3	16.3	16.3	16.3	20.252	0	19.938	90651000	13	P62913	P62913
RPL8	60S ribosomal protein L8	1.95229	2.27522	6	6	6	19.8	19.8	19.8	28.024	0	203.02	349570000	21	P62917	P62917
PPIA	Peptidyl-prolyl cis-trans isomerase A;Peptidyl-prolyl cis-trans isomerase A, N-terminally processed	3.1219	3.02541	10	10	10	75.2	75.2	75.2	18.012	0	95.466	1021600000	39	P62937;Q9Y536;F5H284;P0DN37;P0DN26;A0A0B4J2A2;A0A075B767;A0A075B759	P62937
FKBP1A	Peptidyl-prolyl cis-trans isomerase FKBP1A	-0.446358	-1.36314	2	2	2	25	25	25	11.951	0	77.285	71127000	10	P62942	P62942
RPS27A;UBC;UBB;UBA52	Ubiquitin-40S ribosomal protein S27a;Ubiquitin;40S ribosomal protein S27a;Polyubiquitin-C;Ubiquitin;Polyubiquitin-B;Ubiquitin;Ubiquitin-60S ribosomal protein L40;Ubiquitin;60S ribosomal protein L40	2.34992	1.84067	6	6	6	48.1	48.1	48.1	17.965	0	47.315	625200000	23	P62979;A0A2R8Y422;P0CG48;P0CG47;P62987	P62979;A0A2R8Y422;P0CG48;P0CG47;P62987
RAC1;RAC3	Ras-related C3 botulinum toxin substrate 1;Ras-related C3 botulinum toxin substrate 3	-3.41271	-3.04208	2	2	2	12	12	12	21.45	0	12.773	10342000	3	P63000;P60763	P63000;P60763
YWHAZ	14-3-3 protein zeta/delta	3.96327	3.43564	9	9	6	41.6	41.6	31.8	27.745	0	104.26	501750000	55	P63104	P63104
DYNLL1;DYNLL2	Dynein light chain 1, cytoplasmic;Dynein light chain 2, cytoplasmic	-1.52301	-2.00422	1	1	1	12.4	12.4	12.4	10.366	0.0024038	6.4454	19564000	4	P63167;Q96FJ2	P63167;Q96FJ2
RPL38	60S ribosomal protein L38	-2.83975	-3.70786	1	1	1	14.3	14.3	14.3	8.2178	0	6.7307	15445000	9	P63173	P63173
EIF5A;EIF5AL1	Eukaryotic translation initiation factor 5A-1;Eukaryotic translation initiation factor 5A-1-like	-1.74021	-2.00491	3	3	1	28.6	28.6	11.7	16.832	0	20.067	28066000	2	P63241;Q6IS14;Q9GZV4	P63241;Q6IS14
GNB2L1	Guanine nucleotide-binding protein subunit beta-2-like 1;Guanine nucleotide-binding protein subunit beta-2-like 1, N-terminally processed	0.754918	1.04302	8	8	8	30	30	30	35.076	0	78.794	144940000	17	P63244	P63244
EEF1A1;EEF1A1P5	Elongation factor 1-alpha 1;Putative elongation factor 1-alpha-like 3	5.43217	5.5386	19	19	19	39.6	39.6	39.6	50.14	0	248.11	3597300000	116	P68104;Q5VTE0;Q05639	P68104;Q5VTE0
TUBA1B;TUBA1A;TUBA4A;TUBA3E	Tubulin alpha-1B chain;Tubulin alpha-1A chain;Tubulin alpha-4A chain;Tubulin alpha-3E chain	4.54838	4.46955	13	13	2	35.3	35.3	6.7	50.151	0	269.1	2070400000	69	P68363;Q71U36;P0DPH8;P0DPH7;P68366;Q6PEY2;Q9NY65;A6NHL2	P68363;Q71U36;P0DPH8;P0DPH7;P68366;Q6PEY2
TUBB4B;TUBB4A;TUBB8	Tubulin beta-4B chain;Tubulin beta-4A chain;Tubulin beta-8 chain	4.023	4.09304	14	14	3	34.4	34.4	9.9	49.83	0	124.22	1154400000	100	P68371;P04350;Q3ZCM7	P68371;P04350;Q3ZCM7
HIST1H3A;HIST2H3A;HIST3H3;HIST2H3PS2	Histone H3.1;Histone H3.2;Histone H3.1t;Histone H3	6.0555	4.75539	7	7	2	32.4	32.4	7.4	15.404	0	88.733	14388000000	82	P68431;Q71DI3;Q16695;Q5TEC6;Q6NXT2	P68431;Q71DI3;Q16695;Q5TEC6
GSTO1	Glutathione S-transferase omega-1	-0.667346	0.298015	3	3	3	13.7	13.7	13.7	27.566	0	38.056	111690000	11	P78417	P78417
DCD	Dermcidin;Survival-promoting peptide;DCD-1	2.45404	2.48632	3	3	3	29.1	29.1	29.1	11.284	0	19.707	208200000	9	P81605	P81605
RPL24	60S ribosomal protein L24	4.30905	3.55668	10	10	10	40.1	40.1	40.1	17.779	0	67.559	601680000	22	P83731	P83731
RPL36A	60S ribosomal protein L36a	1.35442	0.561677	3	3	3	17.9	17.9	17.9	12.441	0	18.09	88114000	7	P83881;Q969Q0	P83881
ERH	Enhancer of rudimentary homolog	2.6512	2.01743	3	3	3	36.5	36.5	36.5	12.259	0	21.501	332470000	9	P84090	P84090
RPL19	60S ribosomal protein L19	-0.881089	-0.734545	4	4	4	17.3	17.3	17.3	23.466	0	31.739	123930000	6	P84098	P84098
SRSF3	Serine/arginine-rich splicing factor 3	1.38474	1.19416	3	3	3	22.6	22.6	22.6	19.329	0	34.75	83938000	9	P84103	P84103
H3F3A	Histone H3.3	1.09198	-0.520654	7	2	2	32.4	7.4	7.4	15.328	0	11.871	99309000	5	P84243	P84243
SLC25A3	Phosphate carrier protein, mitochondrial	0.766479	2.86356	3	3	3	7.7	7.7	7.7	40.094	0	27.423	179700000	15	Q00325	Q00325
CLTC	Clathrin heavy chain 1	0.396994	0.526979	5	5	5	3.3	3.3	3.3	191.61	0	31.905	74348000	8	Q00610;P53675	Q00610
FKBP3	Peptidyl-prolyl cis-trans isomerase FKBP3	-4.39363	-5.57617	2	2	2	7.1	7.1	7.1	25.177	0	11.267	3693000	2	Q00688	Q00688
HNRNPU	Heterogeneous nuclear ribonucleoprotein U	1.91985	2.31779	11	11	11	14.8	14.8	14.8	90.583	0	98.992	319710000	35	Q00839	Q00839
PFKP	ATP-dependent 6-phosphofructokinase, platelet type	1.45992	2.64833	17	17	16	28.2	28.2	25.8	85.595	0	156.42	708800000	48	Q01813	Q01813
DSG1	Desmoglein-1	-0.607294	-0.725626	4	4	4	5.5	5.5	5.5	113.75	0	47.563	9450500	5	Q02413	Q02413
RPL18A	60S ribosomal protein L18a	1.78217	1.99984	6	6	6	27.3	27.3	27.3	20.762	0	43.421	154250000	23	Q02543	Q02543
FKBP4	Peptidyl-prolyl cis-trans isomerase FKBP4;Peptidyl-prolyl cis-trans isomerase FKBP4, N-terminally processed	-4.90026	-5.42395	5	5	5	13.3	13.3	13.3	51.804	0	32.741	30986000	6	Q02790	Q02790
RPL6	60S ribosomal protein L6	-1.63195	-1.7804	5	5	5	18.1	18.1	18.1	32.728	0	89.762	42087000	11	Q02878	Q02878
SLC25A11	Mitochondrial 2-oxoglutarate/malate carrier protein	-2.27958	-1.99946	2	2	2	9.6	9.6	9.6	34.061	0	20.264	13168000	5	Q02978	Q02978
EIF4G1	Eukaryotic translation initiation factor 4 gamma 1	-2.80802	-2.38692	3	3	3	3.3	3.3	3.3	175.49	0	29.29	7085700	3	Q04637	Q04637
YWHAH	14-3-3 protein eta	-3.17012	-3.71499	3	1	1	9.8	3.7	3.7	28.218	0	10.963	12371000	1	Q04917	Q04917
PRDX1	Peroxiredoxin-1	3.32587	3.44962	7	7	5	32.2	32.2	23.1	22.11	0	106.82	1013500000	28	Q06830	Q06830
RPL18	60S ribosomal protein L18	1.95138	1.82416	6	6	6	38.3	38.3	38.3	21.634	0	210.01	245740000	20	Q07020	Q07020
C1QBP	Complement component 1 Q subcomponent-binding protein, mitochondrial	-1.28506	-1.48603	1	1	1	5.3	5.3	5.3	31.362	0	7.3864	33124000	1	Q07021	Q07021
TGM3	Protein-glutamine gamma-glutamyltransferase E;Protein-glutamine gamma-glutamyltransferase E 50 kDa catalytic chain;Protein-glutamine gamma-glutamyltransferase E 27 kDa non-catalytic chain	-3.84108	-4.18604	1	1	1	2.3	2.3	2.3	76.631	0.002381	6.4053	2574900	1	Q08188	Q08188
DHX9	ATP-dependent RNA helicase A	-0.466428	-0.14466	7	7	7	6.9	6.9	6.9	140.96	0	49.51	128620000	11	Q08211	Q08211
DSC1	Desmocollin-1	-3.02542	-3.54059	2	2	2	2.8	2.8	2.8	99.986	0	20.273	42742000	4	Q08554	Q08554
RBBP4;RBBP7	Histone-binding protein RBBP4;Histone-binding protein RBBP7	-2.44069	-2.65865	2	2	2	4.5	4.5	4.5	47.655	0	11.418	9140900	2	Q09028;Q16576	Q09028;Q16576
ILF3	Interleukin enhancer-binding factor 3	-4.62471	-4.02557	3	3	3	5.1	5.1	5.1	95.337	0	36.965	14916000	3	Q12906	Q12906
TRAP1	Heat shock protein 75 kDa, mitochondrial	-2.86982	-3.49394	2	2	2	3.4	3.4	3.4	80.109	0	15.695	13506000	4	Q12931	Q12931
ACACA	Acetyl-CoA carboxylase 1;Biotin carboxylase	-2.44943	-1.89661	3	3	3	1.5	1.5	1.5	265.55	0	18.548	41379000	6	Q13085	Q13085
TARDBP	TAR DNA-binding protein 43	-2.89696	-2.83446	1	1	1	4.3	4.3	4.3	44.739	0	12.219	10509000	2	Q13148	Q13148
HNRNPA0	Heterogeneous nuclear ribonucleoprotein A0	-1.32789	-1.39778	2	2	2	10.5	10.5	10.5	30.84	0	17.563	42139000	3	Q13151	Q13151
PRDX4	Peroxiredoxin-4	-0.827216	-0.697821	2	1	1	6.6	4.1	4.1	30.54	0	9.4516	80770000	4	Q13162	Q13162
MAD2L1	Mitotic spindle assembly checkpoint protein MAD2A	-2.59884	-2.52953	1	1	1	3.9	3.9	3.9	23.51	0.0023041	6.326	13237000	3	Q13257	Q13257
TRIM28	Transcription intermediary factor 1-beta	-3.16658	-4.12956	4	4	4	5.9	5.9	5.9	88.549	0	52.096	214840000	8	Q13263	Q13263
G3BP1	Ras GTPase-activating protein-binding protein 1	-3.04053	-3.56468	3	3	3	10.5	10.5	10.5	52.164	0	19.358	18072000	5	Q13283	Q13283
EIF3I	Eukaryotic translation initiation factor 3 subunit I	-1.91257	-1.594	2	2	2	6.5	6.5	6.5	36.501	0	11.563	28194000	3	Q13347	Q13347
UBE2V1	Ubiquitin-conjugating enzyme E2 variant 1	-1.73621	-1.71961	2	2	1	12.9	12.9	4.8	16.495	0	9.8603	9712800	3	Q13404	Q13404
TCOF1	Treacle protein	-1.49117	-2.11621	2	2	2	1.3	1.3	1.3	152.1	0	18.042	3175600	3	Q13428	Q13428
SF3B2	Splicing factor 3B subunit 2	-3.4015	-2.98249	1	1	1	1.5	1.5	1.5	100.23	1	-2	4879700	2	Q13435	Q13435
DDX39B	Spliceosome RNA helicase DDX39B	-0.346461	0.324423	5	5	5	11.4	11.4	11.4	48.991	0	29.526	76133000	7	Q13838;O00148	Q13838
TUBB2B;TUBB2A;TUBB6	Tubulin beta-2B chain;Tubulin beta-2A chain;Tubulin beta-6 chain	-1.57892	-1.40864	11	1	1	24.5	2.7	2.7	49.953	1	-2	8806300	4	Q9BVA1;Q13885;Q9BUF5	Q9BVA1;Q13885;Q9BUF5
HNRNPD	Heterogeneous nuclear ribonucleoprotein D0	-1.56622	-1.24347	2	2	2	6.5	6.5	6.5	38.434	0	25.486	76631000	3	Q14103	Q14103
GANAB	Neutral alpha-glucosidase AB	-2.15775	-1.87993	3	3	3	4.4	4.4	4.4	106.87	0	19.023	138630000	6	Q14697	Q14697
KPNB1	Importin subunit beta-1	1.57256	1.56967	6	6	5	8.6	8.6	7.5	97.169	0	46.107	128080000	11	Q14974	Q14974
EIF4H	Eukaryotic translation initiation factor 4H	0.857174	1.68325	6	6	6	29.4	29.4	29.4	27.385	0	69.21	159330000	16	Q15056	Q15056
PPA1	Inorganic pyrophosphatase	-1.93773	-1.8999	2	2	2	5.5	5.5	5.5	32.66	0	11.388	52387000	4	Q15181	Q15181
PTGES3	Prostaglandin E synthase 3	0.0706711	-0.0915647	4	4	4	23.1	23.1	23.1	18.697	0	24.386	76102000	8	Q15185	Q15185
NONO	Non-POU domain-containing octamer-binding protein	1.0663	1.21166	5	5	4	11.9	11.9	10.2	54.231	0	58.477	214310000	16	Q15233;Q8WXF1	Q15233
PCBP1	Poly(rC)-binding protein 1	-2.4867	-2.21341	4	1	1	14	3.1	3.1	37.497	0	12.841	28021000	5	Q15365	Q15365
PCBP2;PCBP3	Poly(rC)-binding protein 2;Poly(rC)-binding protein 3	1.29674	1.33111	6	6	3	20.5	20.5	9.9	38.58	0	49.403	219870000	18	Q15366;P57721;P57723	Q15366;P57721
TCEB1	Transcription elongation factor B polypeptide 1	-0.962446	-0.8234	3	3	3	34.8	34.8	34.8	12.473	0	36.358	26246000	4	Q15369	Q15369
MAPRE1	Microtubule-associated protein RP/EB family member 1	-1.41995	-1.84799	3	3	3	16	16	16	29.999	0	30.896	91619000	9	Q15691	Q15691
NSDHL	Sterol-4-alpha-carboxylate 3-dehydrogenase, decarboxylating	-2.51308	-2.89371	1	1	1	5.1	5.1	5.1	41.9	0	57.637	40841000	2	Q15738	Q15738
DDB1	DNA damage-binding protein 1	-2.88681	-1.80928	1	1	1	0.7	0.7	0.7	126.97	0	6.9734	11765000	1	Q16531	Q16531
TIMM50	Mitochondrial import inner membrane translocase subunit TIM50	-3.44378	-2.97603	1	1	1	3.4	3.4	3.4	39.646	0	7.5576	37493000	2	Q3ZCQ8	Q3ZCQ8
TCHHL1	Trichohyalin-like protein 1	3.5161	2.92789	1	1	1	1.4	1.4	1.4	99.274	0	8.3607	361150000	6	Q5QJ38	Q5QJ38
KPRP	Keratinocyte proline-rich protein	2.05105	2.35646	5	5	5	11.6	11.6	11.6	64.135	0	95.381	1096300000	10	Q5T749	Q5T749
RALGAPA1	Ral GTPase-activating protein subunit alpha-1	2.07258	2.12796	1	1	1	0.3	0.3	0.3	229.83	0.0041929	6.0909	1161100000	10	Q6GYQ0	Q6GYQ0
DDX46	Probable ATP-dependent RNA helicase DDX46	-2.8307	-3.22504	2	2	2	2	2	2	117.36	0	11.797	4815700	4	Q7L014	Q7L014
DCXR	L-xylulose reductase	-3.44976	-3.15924	2	2	2	10.7	10.7	10.7	25.913	0	12.062	15966000	5	Q7Z4W1	Q7Z4W1
GPR126	G-protein coupled receptor 126	0.771358	0.16281	1	1	1	0.8	0.8	0.8	136.69	1	-2	1002400000	1	Q86SQ4	Q86SQ4
PLD3	Phospholipase D3	-2.20271	-0.327786	2	2	2	4.5	4.5	4.5	54.705	0	11.498	43952000	3	Q8IV08	Q8IV08
HIST3H2BB	Histone H2B type 3-B	-0.337513	-0.195556	9	1	1	55.6	5.6	5.6	13.908	0	6.5133	64001000	2	Q8N257;A0A2R8Y619	Q8N257
SERBP1	Plasminogen activator inhibitor 1 RNA-binding protein	2.11112	1.90067	5	5	5	16.9	16.9	16.9	44.965	0	46.603	131660000	19	Q8NC51	Q8NC51
APOA1BP	NAD(P)H-hydrate epimerase	-3.51413	-3.88104	1	1	1	8	8	8	31.674	0	12.257	10030000	1	Q8NCW5	Q8NCW5
ABHD11	Alpha/beta hydrolase domain-containing protein 11	-3.58163	-3.47558	2	2	2	7.3	7.3	7.3	34.69	0	11.915	33108000	4	Q8NFV4	Q8NFV4
ANGPTL6	Angiopoietin-related protein 6	2.00826	1.72797	1	1	1	1.5	1.5	1.5	51.694	0.0042194	6.1103	8995600000	9	Q8NI99	Q8NI99
POF1B	Protein POF1B	-3.39039	-3.60033	1	1	1	2.7	2.7	2.7	68.064	0	9.1513	16977000	1	Q8WVV4	Q8WVV4
LZIC	Protein LZIC	-0.881894	-1.0123	1	1	1	3.7	3.7	3.7	21.494	0.0043764	6.1665	40816000	2	Q8WZA0	Q8WZA0
H1FX	Histone H1x	3.33372	3.42485	8	8	7	38.5	38.5	30	22.487	0	71.001	343790000	16	Q92522	Q92522
DDX17	Probable ATP-dependent RNA helicase DDX17	-3.17381	-3.25816	4	2	2	6.3	3.2	3.2	80.272	0	12.921	18773000	3	Q92841	Q92841
KHSRP	Far upstream element-binding protein 2	0.436472	0.700262	7	7	7	14.8	14.8	14.8	73.114	0	48.206	104580000	13	Q92945	Q92945
FUBP1	Far upstream element-binding protein 1	-2.18146	-2.62802	4	4	4	7.8	7.8	7.8	67.56	0	294.28	112200000	6	Q96AE4	Q96AE4
HMCN1	Hemicentin-1	5.14781	3.8258	1	1	1	0.1	0.1	0.1	613.38	0.0023529	6.3829	36330000000	16	Q96RW7	Q96RW7
TBCB	Tubulin-folding cofactor B	-0.843357	-0.63449	3	3	3	11.9	11.9	11.9	27.325	0	18.53	56919000	6	Q99426	Q99426
PARK7	Protein deglycase DJ-1	1.6494	1.90205	5	5	5	28	28	28	19.891	0	31.774	108070000	12	Q99497	Q99497
COPS8	COP9 signalosome complex subunit 8	-5.31008	-5.38483	1	1	1	10	10	10	23.225	0	6.8837	21291000	2	Q99627	Q99627
HSD17B10	3-hydroxyacyl-CoA dehydrogenase type-2	-5.60953	-5.57825	2	2	2	10.7	10.7	10.7	26.923	0	12.6	13071000	2	Q99714	Q99714
CCT7	T-complex protein 1 subunit eta	1.27151	1.5423	13	13	13	23.2	23.2	23.2	59.366	0	82.817	276730000	29	Q99832	Q99832
PRMT1	Protein arginine N-methyltransferase 1	-3.31056	-2.9465	2	2	2	6.7	6.7	6.7	42.461	0	12.713	9691100	3	Q99873	Q99873
HIST1H2BL;HIST1H2BA	Histone H2B type 1-L;Histone H2B type 1-A	5.18814	5.00551	9	9	0	55.6	55.6	0	13.952	0	138.15	11508000000	103	Q99880;Q96A08	Q99880;Q96A08
DPYSL5	Dihydropyrimidinase-related protein 5	3.73774	2.85963	1	1	1	1.2	1.2	1.2	61.421	0	9.089	6714000000	26	Q9BPU6	Q9BPU6
TUBA1C	Tubulin alpha-1C chain	-2.62624	-3.26246	12	1	1	32.5	3.8	3.8	49.895	0	6.6775	8843600	2	Q9BQE3	Q9BQE3
ACAT2	Acetyl-CoA acetyltransferase, cytosolic	-3.55388	-3.37803	3	3	3	7.6	7.6	7.6	41.35	0	20.139	51100000	6	Q9BWD1	Q9BWD1
LCE3D	Late cornified envelope protein 3D	-2.40906	-2.10861	1	1	1	8.7	8.7	8.7	9.4435	0	6.6901	26844000	1	Q9BYE3	Q9BYE3
RAB1B;RAB8B;RAB8A;RAB10;RAB13;RAB1C;RAB15	Ras-related protein Rab-1B;Ras-related protein Rab-8B;Ras-related protein Rab-8A;Ras-related protein Rab-10;Ras-related protein Rab-13;Putative Ras-related protein Rab-1C;Ras-related protein Rab-15	-3.00435	-2.58078	2	1	1	10.4	5	5	22.171	0.0023697	6.3987	7777300	3	Q9H0U4;Q92930;P61006;P61026;P51153;Q92928;P59190	Q9H0U4;Q92930;P61006;P61026;P51153;Q92928;P59190
BCL11A	B-cell lymphoma/leukemia 11A	7.03849	6.37509	1	1	1	1.9	1.9	1.9	91.196	0	7.9348	56895000000	104	Q9H165	Q9H165
CPVL	Probable serine carboxypeptidase CPVL	-0.376916	1.92669	3	3	3	6.7	6.7	6.7	54.163	0	20.936	90562000	8	Q9H3G5	Q9H3G5
GLOD4	Glyoxalase domain-containing protein 4	-1.27061	-1.35288	1	1	1	3.5	3.5	3.5	34.793	0	6.6684	23504000	2	Q9HC38	Q9HC38
ENY2	Transcription and mRNA export factor ENY2	1.26191	0.26563	1	1	1	7.9	7.9	7.9	11.528	0.0024096	6.4499	193790000	4	Q9NPA8	Q9NPA8
MCM9	DNA helicase MCM9	-3.46175	-4.01926	1	1	1	0.7	0.7	0.7	127.31	0.0043956	6.1778	57907000	2	Q9NXL9	Q9NXL9
DPP3	Dipeptidyl peptidase 3	-4.29753	-3.91398	1	1	1	2.2	2.2	2.2	82.588	0	7.5511	8084200	2	Q9NY33	Q9NY33
CTSZ	Cathepsin Z	-2.99331	-1.03825	2	2	2	9.2	9.2	9.2	33.868	0	12.768	27260000	4	Q9UBR2	Q9UBR2
ZBTB47	Zinc finger and BTB domain-containing protein 47	3.11062	2.68504	1	1	1	2	2	2	82.759	0.0023148	6.3523	1211900000	8	Q9UFB7	Q9UFB7
PFDN2	Prefoldin subunit 2	-4.68825	-4.36189	1	1	1	9.1	9.1	9.1	16.648	0	9.5386	66885000	3	Q9UHV9	Q9UHV9
ZNF215	Zinc finger protein 215	5.49651	4.98099	1	1	1	2.9	2.9	2.9	60.034	0	11.393	93368000000	49	Q9UL58	Q9UL58
MACF1	Microtubule-actin cross-linking factor 1, isoforms 1/2/3/5	-1.00593	-1.13075	1	1	1	0.2	0.2	0.2	838.3	0.0043011	6.1431	14085000	1	Q9UPN3	Q9UPN3
PA2G4	Proliferation-associated protein 2G4	-0.360776	-0.217602	3	3	3	8.6	8.6	8.6	43.786	0	33.687	77079000	7	Q9UQ80	Q9UQ80
RUVBL2	RuvB-like 2	-1.13786	-0.516075	3	3	3	7.1	7.1	7.1	51.156	0	24.412	35019000	11	Q9Y230	Q9Y230
PIN4	Peptidyl-prolyl cis-trans isomerase NIMA-interacting 4	0.704271	0.720769	2	2	2	16	16	16	13.81	0	12.436	85995000	3	Q9Y237	Q9Y237
RUVBL1	RuvB-like 1	-5.12497	-5.21024	3	3	3	9.4	9.4	9.4	50.227	0	18.325	6708600	3	Q9Y265	Q9Y265
RTCB	tRNA-splicing ligase RtcB homolog	-2.77978	-2.70717	2	2	2	5.1	5.1	5.1	55.21	0	13.183	11445000	4	Q9Y3I0	Q9Y3I0
PSAT1	Phosphoserine aminotransferase	-1.65356	-1.31277	2	2	2	6.2	6.2	6.2	40.422	0	13.434	28754000	6	Q9Y617	Q9Y617
ENPP4	Bis(5-adenosyl)-triphosphatase ENPP4	-3.44668	-0.53104	2	2	2	3.8	3.8	3.8	51.641	0	13.005	110300000	3	Q9Y6X5	Q9Y6X5

## Sheet: Fig. 4E data
Identified proteins (in at least 2 of 3 biological replicates) in volcano plot Fig. 4E (6Yn-Pro+H2O2+NRH vs DMSO+H2O2+NRH control)
Gene names	Protein names	DMSO+N+H 1 (Log2 intensity)	DMSO+N+H 2 (Log2 intensity)	DMSO+N+H 3 (Log2 intensity)	6Yn-Pro+N+H 1 (Log2 intensity)	6Yn-Pro+N+H 2 (Log2 intensity)	6Yn-Pro+N+H 3 (Log2 intensity)	Peptides	Razor + unique peptides	Unique peptides	Sequence coverage [%]	Unique + razor sequence coverage [%]	Unique sequence coverage [%]	Mol. weight [kDa]	Q-value	Score	Intensity	MS/MS count	Protein IDs	Majority protein IDs
SIK1;LOC102724428	Serine/threonine-protein kinase SIK1	0.117732	0.746755	-0.718475	-0.244667	-0.516709	-0.4114	1	1	1	2.8	2.8	2.8	84.901	0.0065359	6.0543	1676700000	6	P57059;A0A0B4J2F2	P57059;A0A0B4J2F2
RAP1B;RAP1A	Ras-related protein Rap-1b;Ras-related protein Rap-1A;Ras-related protein Rap-1b-like protein	0.443575	-1.02227	NaN	-0.122214	0.105639	NaN	2	2	2	12	12	12	20.825	0	15.677	106210000	3	P61224;P62834;A6NIZ1	P61224;P62834;A6NIZ1
SNRPG;SNRPGP15	Small nuclear ribonucleoprotein G;Putative small nuclear ribonucleoprotein G-like protein 15	0.488568	-1.13813	-0.12085	0.336661	0.62101	0.768443	2	2	2	19.7	19.7	19.7	8.496	0	12.459	216200000	7	P62308;A8MWD9	P62308;A8MWD9
HMGB1;HMGB1P1	High mobility group protein B1;Putative high mobility group protein B1-like 1	-0.472622	-0.222796	-0.10704	0.195454	0.117652	0.397742	1	1	1	7.4	7.4	7.4	24.893	0	6.5375	24756000	3	P09429;B2RPK0	P09429;B2RPK0
CLIC1	Chloride intracellular channel protein 1	-0.159634	-0.209131	0.778466	0.137737	0.334171	0.319906	5	5	5	39.8	39.8	39.8	26.922	0	48.327	61957000	11	O00299	O00299
DDX3X;DDX3Y	ATP-dependent RNA helicase DDX3X;ATP-dependent RNA helicase DDX3Y	0.232088	-0.396577	0.362112	-0.302257	0.345849	-0.177242	4	4	4	8.2	8.2	8.2	73.243	0	23.494	62585000	7	O00571;O15523	O00571;O15523
MAN2B1	Lysosomal alpha-mannosidase;Lysosomal alpha-mannosidase A peptide;Lysosomal alpha-mannosidase B peptide;Lysosomal alpha-mannosidase C peptide;Lysosomal alpha-mannosidase D peptide;Lysosomal alpha-mannosidase E peptide	-1.04991	0.684609	-0.0909635	0.345379	-0.0337527	0.800352	1	1	1	1.6	1.6	1.6	113.74	0	6.6873	23536000	5	O00754	O00754
TPP1	Tripeptidyl-peptidase 1	-0.877066	NaN	-1.35344	0.708864	NaN	1.47719	2	2	2	3.7	3.7	3.7	61.247	0	12.324	22035000	2	O14773	O14773
PSMA7	Proteasome subunit alpha type-7	0.355723	0.106064	-0.174795	-0.832366	0.170085	-0.0628434	3	3	3	13.7	13.7	13.7	27.887	0	21.471	67209000	9	O14818;Q8TAA3	O14818
HNRNPDL	Heterogeneous nuclear ribonucleoprotein D-like	0.0579798	0.149505	-0.706	-0.129768	-0.0378249	0.15406	3	3	2	5.2	5.2	3.3	46.437	0	190.87	134670000	7	O14979;Q9ULL8;REV__Q8N0S2;REV__Q9ULL8	O14979
EIF3H	Eukaryotic translation initiation factor 3 subunit H	0.0571636	-0.140045	NaN	-0.214026	0.0954249	NaN	1	1	1	5.4	5.4	5.4	39.93	0	32.219	26966000	4	O15372	O15372
STX7	Syntaxin-7	0.15567	-0.711378	NaN	-0.388338	0.269519	NaN	1	1	1	5.4	5.4	5.4	29.815	0	7.0285	57242000	3	O15400	O15400
ACTN4	Alpha-actinin-4	-0.114572	0.0483468	0.885393	-0.175161	-0.0289575	0.178495	4	4	4	6	6	6	104.85	0	24.467	32987000	6	O43707;P12814;P35609;Q08043	O43707
SNX3	Sorting nexin-3	0.318264	-1.2553	-0.0622854	-0.210011	0.0124792	0	3	3	3	21.6	21.6	21.6	18.762	0	18.306	119320000	8	O60493	O60493
HIST1H2BH;HIST1H2BN;HIST1H2BC;HIST1H2BD;HIST1H2BK;HIST2H2BF;HIST1H2BM;H2BFS	Histone H2B type 1-H;Histone H2B type 1-N;Histone H2B type 1-C/E/F/G/I;Histone H2B type 1-D;Histone H2B type 1-K;Histone H2B type 2-F;Histone H2B type 1-M;Histone H2B type F-S	0.0771992	0.901227	-0.300683	-0.0572483	-0.549756	-0.522542	9	1	0	55.6	5.6	0	13.892	0	6.9355	1443300000	4	Q93079;Q99877;P62807;P58876;O60814;Q5QNW6;Q99879;P57053	Q93079;Q99877;P62807;P58876;O60814;Q5QNW6;Q99879;P57053
H2AFY	Core histone macro-H2A.1	0.221158	-0.276723	-0.848197	-0.0247385	-0.072216	-0.322566	3	3	3	13.2	13.2	13.2	39.617	0	23.269	73799000	9	O75367	O75367
SEC22B	Vesicle-trafficking protein SEC22b	0.216696	NaN	-0.379635	-0.0178322	NaN	0.399855	1	1	1	4.2	4.2	4.2	24.593	0	6.159	28386000	2	O75396	O75396
ATP5H	ATP synthase subunit d, mitochondrial	0.0325967	0.564612	NaN	0.062493	-0.0317762	NaN	2	2	2	20.5	20.5	20.5	18.491	0	12.884	21497000	10	O75947	O75947
RSL1D1	Ribosomal L1 domain-containing protein 1	NaN	0.302074	0.115193	NaN	0.0105871	-0.0923603	2	2	2	3.7	3.7	3.7	54.972	0	11.881	20105000	2	O76021	O76021
NDUFB8	NADH dehydrogenase [ubiquinone] 1 beta subcomplex subunit 8, mitochondrial	0.687228	-1.34937	0.219066	0.370005	0.49488	1.21294	1	1	1	5.4	5.4	5.4	21.766	0	6.1727	37758000	3	O95169	O95169
NDUFA7	NADH dehydrogenase [ubiquinone] 1 alpha subcomplex subunit 7	-0.013382	0.724347	0.204911	-0.233487	-0.438105	-0.0438573	2	2	2	29.2	29.2	29.2	12.551	0	13.422	25886000	5	O95182	O95182
LDHA	L-lactate dehydrogenase A chain	0.189669	0.176634	1.24893	-0.0869192	-0.102467	-0.178468	8	8	7	25.9	25.9	22.3	36.688	0	323.31	427690000	22	P00338;P07864;Q6ZMR3	P00338
GOT2	Aspartate aminotransferase, mitochondrial	0.0885528	-0.0969865	-0.289033	0.0104961	0.00638092	0.101126	3	3	3	9.1	9.1	9.1	47.517	0	19.354	135180000	6	P00505	P00505
PGK1	Phosphoglycerate kinase 1	0.129864	0.259191	0.403309	-0.087689	-0.0267327	-0.227378	6	6	6	20.4	20.4	20.4	44.614	0	238.28	212730000	16	P00558	P00558
ALDOA	Fructose-bisphosphate aldolase A	-0.0880204	0.00961745	1.35378	0.100604	0.127051	-0.0466841	12	12	12	36	36	36	39.42	0	159.46	558500000	32	P04075;P09972;P05062	P04075
GAPDH	Glyceraldehyde-3-phosphate dehydrogenase	-0.120503	0.209836	-0.383497	-0.288776	-0.37788	-0.237278	22	22	22	67.8	67.8	67.8	36.053	0	323.31	6625400000	132	P04406	P04406
ATP1A1	Sodium/potassium-transporting ATPase subunit alpha-1	0.00244832	NaN	0.171173	0.301802	NaN	0.0852436	1	1	1	0.8	0.8	0.8	112.89	0.0065217	6.0494	17145000	2	P05023	P05023
SLC25A5	ADP/ATP translocase 2;ADP/ATP translocase 2, N-terminally processed	-0.293532	-0.0507922	0.10726	0.328682	0.262684	0.267373	7	7	2	22.1	22.1	7.7	32.852	0	51.712	179120000	13	P05141;P12235;Q9H0C2	P05141
PCCA	Propionyl-CoA carboxylase alpha chain, mitochondrial	0.107327	0.646993	NaN	-0.464433	-0.300891	NaN	2	2	2	2.5	2.5	2.5	80.058	0	12.264	44549000	4	P05165	P05165
HMGN2	Non-histone chromosomal protein HMG-17	-0.204396	0.158084	-0.589478	0.132165	0.211293	-0.658046	2	2	2	25.6	25.6	25.6	9.3926	0	13.495	88281000	7	P05204	P05204
RPLP1	60S acidic ribosomal protein P1	-1.30697	-1.0074	NaN	0.963936	0.797653	NaN	1	1	1	14	14	14	11.514	0	6.3657	7006600	4	P05386	P05386
SSB	Lupus La protein	0.336284	-0.477742	-0.247734	-0.206386	0.0356389	0.24198	4	4	4	9.3	9.3	9.3	46.836	0	27.887	95922000	5	P05455	P05455
ATP5G1;ATP5G3;ATP5G2	ATP synthase F(0) complex subunit C1, mitochondrial;ATP synthase F(0) complex subunit C3, mitochondrial;ATP synthase F(0) complex subunit C2, mitochondrial	-0.290205	-1.47884	0.264301	0.0183049	0.548175	0.43918	1	1	1	5.1	5.1	5.1	14.277	0	75.717	285650000	6	P05496;P48201;Q06055	P05496;P48201;Q06055
ENO1	Alpha-enolase	-0.205783	0.235445	0.684538	0.243182	-0.0144459	0.0791591	16	16	16	49.1	49.1	49.1	47.168	0	261.56	805060000	40	P06733;P13929;P09104	P06733
GPI	Glucose-6-phosphate isomerase	-0.167569	0.781083	0.000437379	-0.324822	-0.3756	-0.288813	9	9	9	22.9	22.9	22.9	63.146	0	103.99	753930000	27	P06744;CON__Q3ZBD7	P06744
NPM1	Nucleophosmin	0.0751553	-0.543322	0.00389838	0.0955597	0.191595	0.334041	8	8	8	23.5	23.5	23.5	32.575	0	92.732	826380000	18	P06748	P06748
LDHB	L-lactate dehydrogenase B chain	0.180268	0.444256	-0.856875	-0.0193281	-0.0811725	-0.0151778	7	6	6	26.6	23.1	23.1	36.638	0	251.51	781630000	28	P07195	P07195
P4HB	Protein disulfide-isomerase	-0.599446	-0.223623	1.14586	0.296483	0.269796	0.20418	2	2	2	3.9	3.9	3.9	57.116	0	11.931	19960000	4	P07237	P07237
H1F0	Histone H1.0;Histone H1.0, N-terminally processed	-0.0145066	0.508722	-0.568565	0.134414	-0.169218	-0.256664	4	4	4	20.6	20.6	20.6	20.863	0	54.89	277730000	13	P07305	P07305
CTSD	Cathepsin D;Cathepsin D light chain;Cathepsin D heavy chain	-0.798524	-0.736439	-0.615752	0.609544	0.528798	0.163764	2	2	2	8.5	8.5	8.5	44.552	0	12.784	79410000	6	P07339	P07339
TUBB;TUBB2B;TUBB2A	Tubulin beta chain;Tubulin beta-2B chain;Tubulin beta-2A chain	-0.0196502	-0.0392379	0.149482	0.00451547	0.126475	-0.0723168	15	15	2	45.7	45.7	7.2	49.67	0	191.34	1198500000	60	P07437;Q9BVA1;Q13885;Q3ZCM7;A6NNZ2;Q9BUF5;Q9H4B7;CON__ENSEMBL:ENSBTAP00000025008	P07437;Q9BVA1;Q13885
HEXB	Beta-hexosaminidase subunit beta;Beta-hexosaminidase subunit beta chain B;Beta-hexosaminidase subunit beta chain A	-1.49594	-1.21758	-1.44121	1.37135	0.713476	1.15756	5	5	5	10.6	10.6	10.6	63.111	0	41.281	109600000	9	P07686	P07686
PFN1	Profilin-1	0.243168	-0.764555	-0.36354	-0.0294631	0.222458	0.478657	14	14	14	67.1	67.1	67.1	15.054	0	323.31	3305200000	96	P07737;CON__P02584	P07737
APRT	Adenine phosphoribosyltransferase	-0.0154372	-1.0668	0.0680437	-0.238713	0.207771	-0.0707502	1	1	1	7.2	7.2	7.2	19.608	0	6.3441	16950000	3	P07741	P07741
CTSB	Cathepsin B;Cathepsin B light chain;Cathepsin B heavy chain	NaN	-1.70866	-0.855942	NaN	1.17179	0.61443	2	2	2	9.4	9.4	9.4	37.821	0	12.164	29375000	3	P07858	P07858
HSP90AA1	Heat shock protein HSP 90-alpha	-0.0518737	0.083712	0.283158	0.144474	0.105973	0.025888	10	7	7	14.8	9.8	9.8	84.659	0	73.494	185870000	24	P07900;Q58FG0;Q58FG1	P07900
HNRNPC;HNRNPCL1;HNRNPCL3;HNRNPCL2;HNRNPCL4	Heterogeneous nuclear ribonucleoproteins C1/C2;Heterogeneous nuclear ribonucleoprotein C-like 1;Heterogeneous nuclear ribonucleoprotein C-like 3;Heterogeneous nuclear ribonucleoprotein C-like 2;Heterogeneous nuclear ribonucleoprotein C-like 4	0.0611383	0.0240093	-0.983121	-0.0606149	-0.0636528	-0.0749873	9	9	7	25.5	25.5	21.9	33.67	0	323.31	444960000	14	P07910;O60812;B7ZW38;B2RXH8;P0DMR1;A0A0G2JPF8;A0A0G2JNQ3	P07910;O60812;B7ZW38;B2RXH8;P0DMR1;A0A0G2JPF8;A0A0G2JNQ3
HSP90AB1	Heat shock protein HSP 90-beta	-0.217297	0.135016	0.341319	0.144221	0.131559	0.00863481	11	11	8	15.6	15.6	10.6	83.263	0	254.52	1061100000	42	P08238;Q58FF8;Q58FF7;Q14568	P08238
VIM	Vimentin	-0.000809431	0.98122	-0.953711	-0.032448	-0.20479	0.0206593	22	21	19	45.9	44.4	40.6	53.651	0	323.31	1776100000	70	P08670;P17661;P41219;O43790;P14136;Q14533;P07196;P78386;Q16352;P07197;P78385;CON__P78386;CON__Q14533;CON__H-INV:HIT000292931;CON__P78385;CON__O43790;CON__Q61726;CON__Q6NT21	P08670
RPS17	40S ribosomal protein S17	-0.0587754	0.314178	-0.0227072	0.0549689	0.0170017	-0.00658917	3	3	3	31.1	31.1	31.1	15.55	0	23.095	80111000	8	P08708	P08708
ANXA5	Annexin A5	0.0350521	0.652447	NaN	0.0752414	-0.0138729	NaN	2	2	2	10	10	10	35.936	0	11.733	38665000	3	P08758	P08758
GSTP1	Glutathione S-transferase P	NaN	0.525246	1.93458	NaN	0.212997	-0.190524	2	2	2	12.4	12.4	12.4	23.356	0	11.949	19048000	3	P09211	P09211
HNRNPA1;HNRNPA1L2	Heterogeneous nuclear ribonucleoprotein A1;Heterogeneous nuclear ribonucleoprotein A1, N-terminally processed;Heterogeneous nuclear ribonucleoprotein A1-like 2	-0.324551	-0.127566	-0.124844	0.067916	0.0529388	0.0343425	7	7	7	22.6	22.6	22.6	38.746	0	199.21	443870000	25	P09651;Q32P51;A0A2R8Y4L2	P09651;Q32P51
PARP1	Poly [ADP-ribose] polymerase 1	-1.16453	-0.595127	NaN	0.787749	0.659775	NaN	7	7	7	6.4	6.4	6.4	113.08	0	73.588	96426000	11	P09874	P09874
UCHL1	Ubiquitin carboxyl-terminal hydrolase isozyme L1	0.0180458	-0.0502849	NaN	0.294339	0.135491	NaN	2	2	2	8.5	8.5	8.5	24.824	0	12.089	21517000	2	P09936	P09936
HIST2H2AA3;HIST1H2AG;HIST1H2AJ;H2AFJ;HIST2H2AC;HIST1H2AH;HIST1H2AC;HIST1H2AA;H2AFX;HIST2H2AB	Histone H2A type 2-A;Histone H2A type 1;Histone H2A type 1-J;Histone H2A.J;Histone H2A type 2-C;Histone H2A type 1-H;Histone H2A type 1-C;Histone H2A type 1-A;Histone H2AX;Histone H2A type 2-B	-0.111961	0.228791	-0.0530943	-0.160534	-0.308968	-0.17853	6	6	1	40.8	40.8	5.4	14.095	0	84.162	2123800000	22	Q6FI13;P0C0S8;Q99878;Q9BTM1;Q16777;Q96KK5;Q93077;Q96QV6;P16104;Q8IUE6;REV__Q8NB25	Q6FI13;P0C0S8;Q99878;Q9BTM1;Q16777;Q96KK5;Q93077;Q96QV6;P16104;Q8IUE6
UQCRFS1;UQCRFS1P1	Cytochrome b-c1 complex subunit Rieske, mitochondrial;Cytochrome b-c1 complex subunit 11;Putative cytochrome b-c1 complex subunit Rieske-like protein 1	0.26606	NaN	-0.517956	-0.227763	NaN	-0.152866	2	2	2	12.8	12.8	12.8	29.668	0	13.837	45805000	2	P47985;P0C7P4	P47985;P0C7P4
HSPA1A;HSPA1B	Heat shock 70 kDa protein 1A;Heat shock 70 kDa protein 1B	0.0088402	0.334919	0.230425	-0.0589989	-0.101491	-0.0974724	16	16	11	36.7	36.7	27	70.051	0	323.31	916740000	39	P0DMV8;P0DMV9;P34931	P0DMV8;P0DMV9
HIST1H1E	Histone H1.4	-0.00464082	0.369605	-0.698672	-0.0305077	-0.237165	-0.299019	26	26	10	66.7	66.7	29.7	21.865	0	323.31	53440000000	224	P10412;Q02539;P16401;P22492	P10412
TXN	Thioredoxin	0.40027	0.00471878	0.526052	-0.132004	-0.138914	0.425221	3	3	3	21.9	21.9	21.9	11.737	0	17.201	146700000	5	P10599	P10599
CTSA	Lysosomal protective protein;Lysosomal protective protein 32 kDa chain;Lysosomal protective protein 20 kDa chain	-1.51087	-1.50488	-2.08994	1.46744	1.7432	1.42607	6	6	6	18.3	18.3	18.3	54.465	0	116.52	425140000	17	P10619	P10619
ESD	S-formylglutathione hydrolase	-0.197365	0.0400807	NaN	0.205497	0.0130589	NaN	3	3	3	18.8	18.8	18.8	31.462	0	20.168	16442000	3	P10768	P10768
HSPD1	60 kDa heat shock protein, mitochondrial	-0.433867	-0.0673201	-0.117774	0.0772682	-0.0680796	0.116163	9	9	9	20.1	20.1	20.1	61.054	0	129.67	196400000	18	P10809	P10809
HSPA5	78 kDa glucose-regulated protein	-1.10655	-0.295613	0.216001	0.749371	0.417061	0.293706	9	9	9	20.3	20.3	20.3	72.332	0	55.477	159850000	17	P11021	P11021
ACP2	Lysosomal acid phosphatase	-2.4117	NaN	-2.22052	2.1556	NaN	1.61566	5	5	5	17.7	17.7	17.7	48.344	0	317.21	195380000	9	P11117	P11117
HSPA8	Heat shock cognate 71 kDa protein	-0.0818266	0.427911	0.612562	0.0284082	-0.0765464	-0.109982	10	8	8	22	18.6	18.6	70.897	0	58.8	326720000	18	P11142;P54652	P11142
PABPC1;PABPC4	Polyadenylate-binding protein 1;Polyadenylate-binding protein 4	NaN	-0.200042	0.606686	NaN	0.302877	0.0896099	1	1	1	1.6	1.6	1.6	70.67	0	6.2152	26361000	3	P11940;Q13310	P11940;Q13310
PCNA	Proliferating cell nuclear antigen	0.101236	0.265417	NaN	-0.282289	-0.0361975	NaN	3	3	3	21.1	21.1	21.1	28.768	0	18.788	18505000	7	P12004	P12004
CKB	Creatine kinase B-type	0.262017	-0.015942	-0.809257	-0.00471979	0.035538	0.297	11	11	11	32.5	32.5	32.5	42.644	0	88.846	590700000	42	P12277;P06732	P12277
XRCC6	X-ray repair cross-complementing protein 6	-0.33351	NaN	0.380223	0.0891402	NaN	-0.317209	3	3	3	4.4	4.4	4.4	69.842	0	17.726	23473000	6	P12956	P12956
XRCC5	X-ray repair cross-complementing protein 5	0.0397266	-0.0839305	0.110623	-0.143162	-0.038371	0.0521941	2	2	2	3.6	3.6	3.6	82.704	0	11.992	34575000	3	P13010	P13010
EEF2	Elongation factor 2	0.0498401	0.0913388	0.496703	-0.000184357	0.0121062	0.0287588	16	16	15	21.2	21.2	20	95.337	0	183.07	901150000	37	P13639	P13639
PLS3	Plastin-3	-0.00510645	0.18337	0.735761	-0.187918	0.0637441	-0.0814205	3	3	3	5.1	5.1	5.1	70.81	0	33.38	92840000	6	P13797;P13796	P13797
ETFA	Electron transfer flavoprotein subunit alpha, mitochondrial	0.233905	-0.894749	NaN	-0.054693	0.0757313	NaN	1	1	1	4.8	4.8	4.8	35.079	0	6.1811	4343500	2	P13804	P13804
MIF	Macrophage migration inhibitory factor	-0.58857	-1.33012	-1.72665	1.01647	0.741877	2.23845	4	4	4	41.7	41.7	41.7	12.476	0	76.268	1497100000	37	P14174	P14174
PKM	Pyruvate kinase PKM	-0.0957924	-0.145799	0.481632	0.040903	0.248404	-0.0174867	17	17	17	34.3	34.3	34.3	57.936	0	185.63	1198500000	32	P14618;P30613	P14618
HSP90B1	Endoplasmin	-0.219039	0.605102	0.319488	0.10223	-0.141476	-0.158685	6	6	6	7.1	7.1	7.1	92.468	0	37.454	102080000	11	P14625;Q58FF3	P14625
SNRPB;SNRPN	Small nuclear ribonucleoprotein-associated proteins B and B;Small nuclear ribonucleoprotein-associated protein N	-0.0623145	-0.245163	NaN	-0.106842	0.0852093	NaN	2	2	2	11.7	11.7	11.7	24.61	0	12.319	53513000	4	P14678;P63162	P14678;P63162
HNRNPL	Heterogeneous nuclear ribonucleoprotein L	0.051626	-0.0426042	-0.416701	-0.0483596	0.00685585	0.0559856	9	9	9	19.4	19.4	19.4	64.132	0	64.541	493390000	24	P14866;Q8WVV9	P14866
JUP	Junction plakoglobin	-0.565393	0.310646	2.04095	-0.144976	-0.0392261	-0.260462	5	5	5	8.3	8.3	8.3	81.744	0	54.842	440760000	13	P14923	P14923
AKR1B1	Aldose reductase	0.0202782	0.164011	0.0566512	-0.258455	-0.217807	-0.0598143	6	6	6	19.9	19.9	19.9	35.853	0	35.403	56005000	8	P15121	P15121
EZR;RDX;MSN	Ezrin;Radixin;Moesin	-0.220919	0.370343	1.99266	0.0708596	-0.00758648	-0.0590465	4	4	4	5.6	5.6	5.6	69.412	0	23.203	72218000	5	P15311;P35241;P26038;P35240	P15311;P35241;P26038
NME1	Nucleoside diphosphate kinase A	0.0839379	-0.0993483	-0.588303	-0.0715973	-0.0739294	0.218555	5	5	1	34.2	34.2	9.2	17.149	0	38.749	865580000	18	P15531	P15531
RPS2	40S ribosomal protein S2	0.260021	0.197118	-0.0657923	-0.0996274	-0.139813	0.00461078	6	6	6	18.8	18.8	18.8	31.324	0	89.13	330470000	23	P15880	P15880
DSP	Desmoplakin	-0.534207	NaN	2.92663	-0.367492	NaN	-0.123739	14	14	14	5.2	5.2	5.2	331.77	0	107.14	147020000	16	P15924	P15924
HIST1H1D	Histone H1.3	0.280846	0.448747	-0.633908	-0.0498747	-0.327242	-0.374907	21	7	6	57.9	25.3	23.5	22.35	0	56.502	878490000	18	P16402;REV__P16402	P16402
HIST1H1C	Histone H1.2	0.0751779	0.519652	-0.793804	-0.18621	-0.326747	-0.453343	23	8	8	60.6	23	23	21.364	0	61.599	2264700000	36	P16403	P16403
PCSK2	Neuroendocrine convertase 2	-0.233082	0.647573	-0.86908	-0.259264	-0.543635	-0.36279	1	1	1	1.6	1.6	1.6	70.564	1	-2	120730000000	17	P16519	P16519
HSPA6;HSPA7	Heat shock 70 kDa protein 6;Putative heat shock 70 kDa protein 7	-0.145325	0.289933	0.0529546	-0.00966913	-0.142428	0.0379962	6	1	1	11.4	1.7	1.7	71.027	0	8.805	265450000	6	P17066;P48741	P17066;P48741
DDX5;DDX17	Probable ATP-dependent RNA helicase DDX5;Probable ATP-dependent RNA helicase DDX17	-0.0340792	NaN	-0.0348763	0.050043	NaN	0.118239	4	4	4	7.5	7.5	7.5	69.147	0	24.899	32459000	4	P17844;Q92841	P17844;Q92841
PFKL	ATP-dependent 6-phosphofructokinase, liver type	-0.471094	-0.0631939	-0.549785	0.746014	-0.399934	0.817151	6	4	4	10.1	8.1	8.1	85.018	0	29.536	39243000	5	P17858	P17858
PSMC3	26S protease regulatory subunit 6A	0.298414	-0.216903	NaN	0.313213	0.0919762	NaN	1	1	1	1.6	1.6	1.6	49.203	0.0022676	6.1341	13166000	2	P17980	P17980
RPL35A	60S ribosomal protein L35a	-0.155835	-0.168188	0	0.066726	0.243822	0.184391	3	3	3	20	20	20	12.538	0	18.852	52477000	5	P18077	P18077
RPL7	60S ribosomal protein L7	0.346426	-1.76753	-0.161999	-0.150516	0.520182	1.27875	12	12	12	46.8	46.8	46.8	29.225	0	132.47	853840000	42	P18124	P18124
RPL17	60S ribosomal protein L17	0.0121474	NaN	0.710735	0.0981408	NaN	-0.149017	2	2	2	8.7	8.7	8.7	21.397	0	12.154	40440000	2	P18621	P18621
PGAM1;PGAM2;PGAM4	Phosphoglycerate mutase 1;Phosphoglycerate mutase 2;Probable phosphoglycerate mutase 4	0.0294677	-1.03448	1.40349	0.439289	0.357017	0.0347128	5	5	5	18.9	18.9	18.9	28.804	0	31.536	57963000	9	P18669;P15259;Q8N0Y7	P18669;P15259;Q8N0Y7
NCL	Nucleolin	-0.330615	-0.0854044	-0.0684613	0.126839	0.077871	0.0660297	10	10	10	16.1	16.1	16.1	76.613	0	72.686	105700000	17	P19338	P19338
HK1	Hexokinase-1	NaN	-0.275118	1.0834	NaN	-0.134248	-0.219205	2	2	2	3.1	3.1	3.1	102.48	0	12.184	18394000	2	P19367	P19367
PRPS1;PRPS1L1;PRPS2	Ribose-phosphate pyrophosphokinase 1;Ribose-phosphate pyrophosphokinase 3;Ribose-phosphate pyrophosphokinase 2	NaN	-0.577035	-0.645221	NaN	-0.0647443	-0.409474	2	2	2	7.9	7.9	7.9	34.834	0	11.415	9908800	2	P60891;P21108;P11908	P60891;P21108;P11908
FLNA	Filamin-A	-0.329677	0.33633	-0.0729979	-0.0778487	-0.0776374	0.0551902	27	27	27	14.8	14.8	14.8	280.74	0	183.47	655280000	57	P21333;O75369;Q14315	P21333
VDAC1	Voltage-dependent anion-selective channel protein 1	0.105935	-0.774235	-0.3174	0.140151	0.284138	-0.148878	2	2	2	12	12	12	30.772	0	13.399	36041000	4	P21796	P21796
SDHB	Succinate dehydrogenase [ubiquinone] iron-sulfur subunit, mitochondrial	-0.325633	NaN	-0.373896	-0.0646008	NaN	-0.308764	1	1	1	3.2	3.2	3.2	31.629	0.0064795	6.0284	34250000	2	P21912	P21912
GART	Trifunctional purine biosynthetic protein adenosine-3;Phosphoribosylamine--glycine ligase;Phosphoribosylformylglycinamidine cyclo-ligase;Phosphoribosylglycinamide formyltransferase	NaN	0.127169	-0.0940617	NaN	-0.230211	-0.228786	2	2	2	3.1	3.1	3.1	107.77	0	12.001	10389000	3	P22102	P22102
SCP2	Non-specific lipid-transfer protein	0.256833	-0.404667	-0.397334	0.10408	-0.144885	0.378377	2	2	2	4.2	4.2	4.2	58.993	0	12.273	29273000	4	P22307	P22307
UBA1	Ubiquitin-like modifier-activating enzyme 1	-0.108968	NaN	0.0123526	0.178181	NaN	0.33589	5	5	5	5.1	5.1	5.1	117.85	0	31.881	70181000	7	P22314	P22314
SPRR2B;SPRR2D;SPRR2E;SPRR2A;SPRR2G	Small proline-rich protein 2B;Small proline-rich protein 2D;Small proline-rich protein 2E;Small proline-rich protein 2A;Small proline-rich protein 2G	-0.27374	NaN	3.33002	-0.0566049	NaN	-0.451631	1	1	1	18.1	18.1	18.1	7.9754	0	7.0071	76930000	2	P35325;P22532;P22531;P35326;Q9BYE4	P35325;P22532;P22531;P35326;Q9BYE4
HNRNPA2B1	Heterogeneous nuclear ribonucleoproteins A2/B1	0.287656	-0.521428	-0.431142	-0.0258216	0.215133	0.362992	12	12	12	45.3	45.3	45.3	37.429	0	323.31	1141200000	42	P22626	P22626
SFPQ	Splicing factor, proline- and glutamine-rich	-0.172883	0.6182	0.388193	-0.163941	1.32849	-0.0635066	3	3	3	5.1	5.1	5.1	76.149	0	17.888	39407000	6	P23246	P23246
PPIB	Peptidyl-prolyl cis-trans isomerase B	-0.117616	0.41363	-0.33488	-0.083786	-0.0941888	0.251323	3	3	3	11.1	11.1	11.1	23.742	0	39.264	61803000	6	P23284	P23284
RPS3	40S ribosomal protein S3	0.0856873	-0.0252514	0.0269355	-0.065789	-0.00720632	-0.23504	4	4	4	13.2	13.2	13.2	26.688	0	23.557	86988000	5	P23396	P23396
AHCY	Adenosylhomocysteinase	0.0398126	-0.259777	-0.620404	-0.286591	0.100015	0.143343	5	5	5	11.8	11.8	11.8	47.716	0	29.934	89036000	11	P23526	P23526
CFL1	Cofilin-1	0.101818	-0.260936	1.37889	-0.0469763	0.385159	0.0628625	2	2	2	6.6	6.6	6.6	18.502	0	11.93	83245000	6	P23528	P23528
EIF4B	Eukaryotic translation initiation factor 4B	0.35045	1.23226	-0.278474	-0.244894	-0.157997	-0.318858	6	6	6	12.8	12.8	12.8	69.15	0	57.189	138640000	12	P23588	P23588
RPS12	40S ribosomal protein S12	0.405704	-0.142722	0.17596	-0.0445307	-0.0654908	0.571397	5	5	5	31.8	31.8	31.8	14.515	0	31.864	336360000	13	P25398	P25398
ATP5A1	ATP synthase subunit alpha, mitochondrial	-0.123699	0.240899	1.09574	0.0285034	0.165209	0.0283406	2	2	2	2.9	2.9	2.9	59.75	0	24.677	57610000	4	P25705	P25705
PSMA1	Proteasome subunit alpha type-1	0.340654	-0.166978	NaN	-0.042224	-0.0358874	NaN	4	4	4	15.2	15.2	15.2	29.555	0	25.311	83770000	8	P25786	P25786
RPL13	60S ribosomal protein L13	NaN	-0.252528	0.169362	NaN	0.107687	0.0146444	3	3	3	15.2	15.2	15.2	24.261	0	17.959	37540000	3	P26373	P26373
PTBP1	Polypyrimidine tract-binding protein 1	0.181861	0.15883	0.23781	-0.134542	-0.156999	-0.0697958	7	7	6	16.2	16.2	16	57.221	0	52.78	109700000	14	P26599;O95758	P26599
EEF1G	Elongation factor 1-gamma	-0.00921118	-0.229688	-0.000998735	-0.0339347	0.033873	0.135285	12	12	12	24.5	24.5	24.5	50.118	0	207.28	1023100000	47	P26641	P26641
RPL10;RPL10L	60S ribosomal protein L10;60S ribosomal protein L10-like	NaN	0.31322	0.359683	NaN	0.205776	0.0165775	1	1	1	5.6	5.6	5.6	24.604	0	6.7641	27976000	2	P27635;Q96L21	P27635;Q96L21
CALR	Calreticulin	0.144413	0.600591	0.264558	-0.116517	-0.191843	-0.233652	7	7	7	16.5	16.5	16.5	48.141	0	45.455	386020000	19	P27797	P27797
PSMA5	Proteasome subunit alpha type-5	0.132832	0.176416	-0.388641	-0.24851	-0.165309	-0.109902	3	3	3	14.9	14.9	14.9	26.411	0	45.084	377040000	6	P28066	P28066
PSMB5	Proteasome subunit beta type-5	-0.0979028	-0.481021	-0.62514	-0.0594301	0.188146	0.477548	7	7	7	32.7	32.7	32.7	28.48	0	83.13	188550000	22	P28074	P28074
TKT	Transketolase	-0.191759	NaN	0.542572	-0.06508	NaN	0.0365906	2	2	2	2.9	2.9	2.9	67.877	0	11.698	8684700	3	P29401	P29401
PRDX3	Thioredoxin-dependent peroxide reductase, mitochondrial	-0.0931357	-0.121808	-0.204657	0.098767	-0.0212791	-0.212638	2	2	2	9	9	9	27.692	0	12.853	29002000	5	P30048	P30048
RPL12	60S ribosomal protein L12	0.276708	-0.369838	-0.166818	-0.0575499	0.0626047	0.408668	8	8	8	59.4	59.4	59.4	17.818	0	108.55	711130000	28	P30050	P30050
PDIA3	Protein disulfide-isomerase A3	-0.582726	-0.36896	NaN	0.260779	0.138234	NaN	3	3	3	7.3	7.3	7.3	56.782	0	19.184	59006000	7	P30101	P30101
DNAJA1	DnaJ homolog subfamily A member 1	0.146203	-0.872217	-0.223644	-0.194914	0.204849	0.0330545	2	2	2	8.1	8.1	8.1	44.868	0	12.236	35503000	3	P31689	P31689
HNRNPH1	Heterogeneous nuclear ribonucleoprotein H;Heterogeneous nuclear ribonucleoprotein H, N-terminally processed	-0.467278	0.307654	-0.43345	0.197792	-0.347928	0.0277776	9	9	8	28.1	28.1	24.3	49.229	0	64.055	262870000	24	P31943;P55795	P31943
YWHAB	14-3-3 protein beta/alpha;14-3-3 protein beta/alpha, N-terminally processed	-0.316676	-1.52098	1.21783	0.296174	0.278349	0.681983	6	2	2	25.6	14.6	14.6	28.082	0	12.838	58540000	5	P31946	P31946
SFN	14-3-3 protein sigma	0.0847301	-0.475553	3.73658	-0.016828	0.148049	-0.175953	6	4	4	28.2	21.4	21.4	27.774	0	108.55	276950000	9	P31947	P31947
STIP1	Stress-induced-phosphoprotein 1	-0.0805302	0.128887	-0.330957	0.00714737	-0.0244356	-0.0706919	2	2	2	3.1	3.1	3.1	62.639	0	12.052	23754000	6	P31948	P31948
PRDX2	Peroxiredoxin-2	-0.558572	-0.476438	0.0903547	-0.052256	-0.203885	0.0293806	4	3	3	23.2	17.7	17.7	21.892	0	18.791	151340000	14	P32119	P32119
DUT	Deoxyuridine 5-triphosphate nucleotidohydrolase, mitochondrial	0.379371	-0.996776	-0.685887	0.053354	0.358659	0.566227	5	5	5	19.8	19.8	19.8	26.563	0	256.63	500740000	22	P33316	P33316
SHMT2;SHMT1	Serine hydroxymethyltransferase, mitochondrial;Serine hydroxymethyltransferase, cytosolic	-0.0330256	0.0886681	NaN	0.185903	0.114344	NaN	2	2	2	5	5	5	55.992	0	12.322	42559000	3	P34897;P34896	P34897;P34896
HSPA4	Heat shock 70 kDa protein 4	0.296273	NaN	-0.0821425	0.394071	NaN	-0.0523878	6	6	4	8.9	8.9	6.3	94.33	0	35.396	46696000	8	P34932;O95757	P34932
PHB	Prohibitin	-0.148052	0.961305	NaN	0.053227	-0.0412941	NaN	3	3	3	13.6	13.6	13.6	29.804	0	21.945	21627000	5	P35232	P35232
RPL22	60S ribosomal protein L22	0.365039	-0.327112	NaN	-0.0126216	0.135003	NaN	4	4	4	32.8	32.8	32.8	14.787	0	26.556	159640000	10	P35268	P35268
MYH9	Myosin-9	-0.641117	0.0208372	1.37119	-0.0770878	-0.0233774	-0.119067	12	12	11	7.4	7.4	6.6	226.53	0	75.835	160500000	23	P35579;P35749	P35579
RPL4	60S ribosomal protein L4	-0.069676	0.224272	0.0689206	0.112731	-0.301839	-0.143	6	6	6	12.6	12.6	12.6	47.697	0	211.09	179340000	17	P36578	P36578
TAGLN2	Transgelin-2	0.170083	-0.12068	-0.250402	0.0125113	0.169122	0.159109	11	11	11	50.3	50.3	50.3	22.391	0	225.74	482150000	40	P37802;Q9UI15	P37802
TALDO1	Transaldolase	NaN	-0.58041	-0.529704	NaN	0.169082	0.538967	4	4	4	11	11	11	37.54	0	23.837	72540000	5	P37837	P37837
RBMX	RNA-binding motif protein, X chromosome;RNA-binding motif protein, X chromosome, N-terminally processed	-0.841213	-0.917674	NaN	0.661776	0.501387	NaN	2	2	2	6.6	6.6	6.6	42.331	0	11.163	10369000	2	P38159	P38159
HSPA9	Stress-70 protein, mitochondrial	0.429176	-0.442264	0.203941	-0.305659	0.21996	0.358068	3	3	3	6.5	6.5	6.5	73.68	0	18.334	40372000	8	P38646	P38646
EIF4A3	Eukaryotic initiation factor 4A-III;Eukaryotic initiation factor 4A-III, N-terminally processed	0.0246565	0.313263	-0.174434	0.0148152	-0.177211	-0.0651286	5	4	4	14.6	12.4	12.4	46.871	0	29.717	113570000	11	P38919	P38919
RPL3	60S ribosomal protein L3	-0.0321313	0.150802	0.685822	0.102038	0.0175703	-0.0681643	7	7	7	12.7	12.7	12.7	46.108	0	41.944	149560000	14	P39023;Q92901	P39023
CCT6A	T-complex protein 1 subunit zeta	-0.402018	-0.385081	NaN	0.123874	0.123485	NaN	2	2	2	4.7	4.7	4.7	58.024	0	12.276	41770000	4	P40227	P40227
RPL13A	60S ribosomal protein L13a	0.124297	0.267408	NaN	-0.156061	0.0393984	NaN	2	2	2	8.9	8.9	8.9	23.577	0	12.433	38692000	5	P40429	P40429
MDH1	Malate dehydrogenase, cytoplasmic	-0.230107	-0.0867933	-0.200292	-0.497431	0.0499718	0.22246	4	4	4	11.7	11.7	11.7	36.426	0	24.357	65991000	6	P40925	P40925
MDH2	Malate dehydrogenase, mitochondrial	-0.167738	0.0351906	0.57686	-0.0893051	-0.0630735	0.14403	3	3	3	10.1	10.1	10.1	35.503	0	20.138	70447000	9	P40926	P40926
EIF2S3;EIF2S3L	Eukaryotic translation initiation factor 2 subunit 3;Putative eukaryotic translation initiation factor 2 subunit 3-like protein	-0.147747	0.358012	-0.0743234	-0.0891531	-0.188661	0.119015	1	1	1	3.4	3.4	3.4	51.109	0	6.4907	13641000	3	P41091;Q2VIR3	P41091;Q2VIR3
PNPLA4	Patatin-like phospholipase domain-containing protein 4	-0.338275	NaN	0.360147	0.611634	NaN	0.186368	3	3	3	16.2	16.2	16.2	27.98	0	18.468	16096000	4	P41247	P41247
RPL35	60S ribosomal protein L35	0.208098	NaN	0.75289	0.134372	NaN	-0.301744	2	2	2	14.6	14.6	14.6	14.551	0	11.28	23771000	2	P42766	P42766
MATR3	Matrin-3	-0.0380622	0.171399	-0.208931	-0.108722	0.0514679	0.0597395	3	3	3	3.3	3.3	3.3	94.622	0	52.216	26923000	5	P43243	P43243
NAMPT	Nicotinamide phosphoribosyltransferase	0.0455866	-0.197725	1.36165	-0.0896296	0.0146487	-0.171625	1	1	1	1.8	1.8	1.8	55.52	0.0044743	6.1167	15612000	4	P43490	P43490
VDAC2	Voltage-dependent anion-selective channel protein 2	-0.0719981	0.116221	-0.099683	0.315285	0.0717455	0.385829	5	5	5	22.1	22.1	22.1	31.566	0	56.164	231360000	12	P45880	P45880
RPL27A	60S ribosomal protein L27a	0.0925447	0.146017	NaN	-0.0914176	-0.103945	NaN	3	3	3	29.1	29.1	29.1	16.561	0	18.6	34264000	5	P46776	P46776
RPL21	60S ribosomal protein L21	0.08887	0.0383995	0.18461	0.00146824	-0.130799	-0.367666	4	4	4	26.2	26.2	26.2	18.565	0	25.234	106380000	14	P46778	P46778
RPL28	60S ribosomal protein L28	-0.317247	0.0287243	-0.275705	0.135226	-0.167116	-0.0824838	3	3	3	19.7	19.7	19.7	15.747	0	18.244	39240000	7	P46779	P46779
RPS9	40S ribosomal protein S9	-0.0482974	0.528961	0.556954	0.110432	-0.0543631	-0.0529187	3	3	3	16.5	16.5	16.5	22.591	0	19.052	140690000	7	P46781	P46781
RPS5	40S ribosomal protein S5;40S ribosomal protein S5, N-terminally processed	0.00584769	-0.0563848	0.252297	0.196517	0.0899132	0.172656	8	8	8	47.1	47.1	47.1	22.876	0	107.78	326210000	24	P46782	P46782
RPS10	40S ribosomal protein S10	-0.0707716	-0.142398	0.820479	0.250998	-0.171652	0.0819105	1	1	1	5.5	5.5	5.5	18.898	0	18.823	163980000	3	P46783	P46783
RPL29	60S ribosomal protein L29	-0.354239	0.362445	-0.0217158	0.206571	-0.172436	-0.403234	4	4	4	23.3	23.3	23.3	17.752	0	24.896	123400000	11	P47914	P47914
ATP5O	ATP synthase subunit O, mitochondrial	0.0684457	0.769187	-0.590833	-0.159965	-0.467826	-0.273922	7	7	7	39	39	39	23.277	0	102.3	130810000	19	P48047	P48047
PREP	Prolyl endopeptidase	-0.422809	-0.173693	-0.654227	1.04155	0.526316	0.665961	10	10	10	16.6	16.6	16.6	80.699	0	64.718	135040000	20	P48147	P48147
CCT5	T-complex protein 1 subunit epsilon	0.13293	0.329862	NaN	0.124922	0.0991559	NaN	2	2	2	4.3	4.3	4.3	59.67	0	12.002	38365000	3	P48643	P48643
RPL34	60S ribosomal protein L34	0.35377	0.15228	0.297341	0.0120346	-0.0473489	-0.0480989	2	2	2	12	12	12	13.293	0	124.82	179020000	4	P49207	P49207
CCT3	T-complex protein 1 subunit gamma	-0.235375	0.134459	0.00703609	0.0390856	0.172073	0.104928	3	3	3	6.4	6.4	6.4	60.533	0	17.729	42292000	6	P49368	P49368
TUFM	Elongation factor Tu, mitochondrial	-0.0803325	0.104717	0.0402001	-0.0982201	-0.118407	-0.156642	6	6	6	19.9	19.9	19.9	49.541	0	69.21	78610000	14	P49411	P49411
HINT1	Histidine triad nucleotide-binding protein 1	-0.090716	-0.264213	-0.334488	0.0800342	0.0893072	0.373528	2	2	2	19	19	19	13.802	0	18.722	99185000	8	P49773	P49773
SERPINH1	Serpin H1	0.465294	0.603732	-0.804533	-0.409447	-0.122664	-0.014129	1	1	1	1.9	1.9	1.9	46.44	0	13.285	67042000	4	P50454	P50454
VASP	Vasodilator-stimulated phosphoprotein	-0.100565	0.658064	-0.846563	-0.468611	-0.493986	0.00178981	1	1	1	5.5	5.5	5.5	39.829	0	6.5052	426750000	4	P50552	P50552
RPL14	60S ribosomal protein L14	-0.154168	0.309018	0.128619	0.0751949	-0.155465	0.0756228	3	3	3	14	14	14	23.432	0	18.296	23224000	7	P50914	P50914
CCT8	T-complex protein 1 subunit theta	-0.951547	-0.415827	NaN	0.598701	0.137259	NaN	2	2	2	3.5	3.5	3.5	59.62	0	11.703	52607000	4	P50990	P50990
CCT4	T-complex protein 1 subunit delta	-0.491171	0.00769508	-0.265946	0.364622	0.233908	-0.0923507	3	3	3	5.8	5.8	5.8	57.924	0	19.49	114640000	9	P50991	P50991
RAB5C	Ras-related protein Rab-5C	-0.0899291	NaN	0.257689	0.139688	NaN	0.274202	1	1	1	5.6	5.6	5.6	23.482	0	6.4961	15591000	2	P51148	P51148
BCAP31	B-cell receptor-associated protein 31	0.106453	-1.5791	0.558165	0.146449	0.28472	0.429767	2	2	2	7.7	7.7	7.7	27.991	0	12.052	50679000	3	P51572	P51572
PGD	6-phosphogluconate dehydrogenase, decarboxylating	-0.174604	NaN	0.034966	0.190214	NaN	0.0465016	3	3	3	7.9	7.9	7.9	53.139	0	18.523	21287000	4	P52209	P52209
HNRNPM	Heterogeneous nuclear ribonucleoprotein M	-0.179707	0.262154	-0.686286	0.0506471	0.055619	-0.435666	5	5	4	7.7	7.7	5.5	77.515	0	70.51	336750000	5	P52272	P52272
KPNA2	Importin subunit alpha-1	-0.394685	1.38118	NaN	0.248216	-0.473196	NaN	1	1	1	3.8	3.8	3.8	57.861	0.0044543	6.1028	9495000	2	P52292	P52292
ARHGDIA	Rho GDP-dissociation inhibitor 1	0.0974184	-0.0011133	-0.691349	-0.3419	0.0211089	0.253425	4	4	4	27	27	27	23.207	0	35.768	122970000	16	P52565	P52565
HNRNPF	Heterogeneous nuclear ribonucleoprotein F;Heterogeneous nuclear ribonucleoprotein F, N-terminally processed	0.123013	-0.898481	0.228142	0.0345542	-0.150676	-1.17669	3	2	2	11.1	7	7	45.671	0	13.668	33596000	6	P52597	P52597
PPP5C;PPP5D1	Serine/threonine-protein phosphatase 5;Protein PPP5D1	-0.61231	NaN	-0.29341	0.33141	NaN	0.0105152	2	2	2	4	4	4	56.878	0	11.764	10149000	3	P53041;E7EU14	P53041;E7EU14
CTSC	Dipeptidyl peptidase 1;Dipeptidyl peptidase 1 exclusion domain chain;Dipeptidyl peptidase 1 heavy chain;Dipeptidyl peptidase 1 light chain	-0.0578933	0.458025	-0.2895	0.053113	-0.395654	-0.194784	2	2	2	7.6	7.6	7.6	51.853	0	14.689	39728000	5	P53634	P53634
VCP	Transitional endoplasmic reticulum ATPase	-0.339778	-0.180586	NaN	0.451022	0.0637347	NaN	6	6	6	9.2	9.2	9.2	89.321	0	41.934	33376000	7	P55072	P55072
NPEPPS	Puromycin-sensitive aminopeptidase	-0.469626	-0.280232	0.167448	0.336876	0.242101	0.273299	1	1	1	1	1	1	103.28	0.0044053	6.0849	21365000	6	P55786	P55786
EPPK1	Epiplakin	-0.57364	0.19788	NaN	-0.121277	0.0778195	NaN	1	1	1	1.3	1.3	1.3	555.65	0	6.9296	12616000	2	P58107	P58107
TPI1	Triosephosphate isomerase	-0.0569532	-0.24016	0.0284529	-0.00820655	-0.0235922	0.147132	14	14	14	72.3	72.3	72.3	26.669	0	323.31	1836400000	70	P60174	P60174
MYL6	Myosin light polypeptide 6	0.210688	-0.521724	0.471701	-0.155681	0.265697	0.382655	5	5	5	43	43	43	16.93	0	36.166	128050000	21	P60660;P14649	P60660
ACTB	Actin, cytoplasmic 1;Actin, cytoplasmic 1, N-terminally processed	-0.0766541	0.0011133	0.724053	0.0408124	0.0287466	-0.131101	19	19	1	58.9	58.9	4.5	41.736	0	323.31	10943000000	178	P60709;Q6S8J3;A5A3E0;P0CG38;Q562R1;P0CG39;Q9BYX7	P60709
EIF4A1;EIF4A2	Eukaryotic initiation factor 4A-I;Eukaryotic initiation factor 4A-II;Eukaryotic initiation factor 4A-II, N-terminally processed	-0.192095	-0.274313	0.0265617	0.134141	0.200618	0.0296183	5	5	4	13.3	13.3	11.1	46.153	0	36.832	183990000	11	P60842;Q14240	P60842;Q14240
CDC42	Cell division control protein 42 homolog	0.0911876	-0.319704	0.516463	0.0685193	-0.0205666	0.242571	2	2	2	11	11	11	21.258	0	12.891	102390000	6	P60953	P60953
DSTN	Destrin	-0.222011	0.106628	0.391829	-0.115615	0.0027895	0.652256	2	2	2	10.9	10.9	10.9	18.506	0	12.918	24821000	4	P60981	P60981
ACTR2	Actin-related protein 2	-0.318837	NaN	-0.436443	-0.0690374	NaN	-0.193281	2	2	2	6.9	6.9	6.9	44.76	0	12.069	8820300	2	P61160	P61160
RPS3A	40S ribosomal protein S3a	-0.37584	0.337206	0.513986	0.202279	-0.0221115	-0.197958	5	5	5	13.6	13.6	13.6	29.945	0	40.986	75249000	8	P61247	P61247
RPL15	60S ribosomal protein L15	0.250919	-0.313464	0.142829	-0.0361944	0.0760198	0.0320277	5	5	5	22.5	22.5	22.5	24.146	0	34.473	338550000	19	P61313	P61313
RPL37	60S ribosomal protein L37	0.321108	NaN	0.15843	-0.42323	NaN	-0.545695	3	3	3	27.8	27.8	27.8	11.078	0	17.956	105450000	3	P61927	P61927
SUMO2	Small ubiquitin-related modifier 2	-0.487	0.198249	-0.75298	0.21233	0.318582	-0.0552257	2	2	1	21.1	21.1	10.5	10.871	0	9.8777	88557000	3	P61956	P61956
HNRNPK	Heterogeneous nuclear ribonucleoprotein K	-0.128299	-0.179816	0.175959	0.163752	0.154822	0.0735853	4	4	4	13.4	13.4	13.4	50.976	0	31.555	112550000	11	P61978	P61978
YWHAG	14-3-3 protein gamma;14-3-3 protein gamma, N-terminally processed	0.166059	-0.498363	NaN	-0.16421	0.110166	NaN	4	3	3	18.6	15.4	15.4	28.302	0	17.715	207630000	7	P61981	P61981
RPS8	40S ribosomal protein S8	-0.0555136	0.0648059	0.309626	0.0464309	0.0630479	-0.361272	2	2	2	12.5	12.5	12.5	24.205	0	13.803	65836000	5	P62241	P62241
RPS15A	40S ribosomal protein S15a	-0.0327657	-0.215567	0.816769	0.0431587	0.128927	0.112791	1	1	1	6.2	6.2	6.2	14.839	0	6.6317	122510000	3	P62244	P62244
RPS16	40S ribosomal protein S16	NaN	0.0585599	0.48105	NaN	-0.00318229	-0.0416198	3	3	3	22.6	22.6	22.6	16.445	0	36.11	26222000	6	P62249	P62249
YWHAE	14-3-3 protein epsilon	0.080004	-0.20559	-0.255586	0.0834206	0.0174131	0.257216	6	5	5	35.3	32.2	32.2	29.174	0	110.56	202790000	11	P62258	P62258
RPS14	40S ribosomal protein S14	0.662629	-0.144038	-0.047398	-0.469269	-0.00529003	0.148249	5	5	5	31.8	31.8	31.8	16.273	0	36.353	156390000	11	P62263	P62263
RPS23	40S ribosomal protein S23	0.224536	0.183577	0.395293	0.297671	-0.0955499	0.019878	2	2	2	15.4	15.4	15.4	15.807	0	11.9	16399000	3	P62266	P62266
RPS11	40S ribosomal protein S11	-0.109621	-0.148546	0.391721	0.0538068	0.256364	0.163512	5	5	5	23.4	23.4	23.4	18.431	0	30.247	156870000	10	P62280	P62280
SNRPE	Small nuclear ribonucleoprotein E	0.157701	NaN	-0.777448	-0.184535	NaN	0.412282	1	1	1	17.4	17.4	17.4	10.803	0	6.6572	73610000	3	P62304	P62304
RPL7A	60S ribosomal protein L7a	0.0398653	0.357751	-0.122845	-0.0496919	-0.258733	-0.0463692	11	11	11	43.2	43.2	43.2	29.995	0	182.23	649950000	33	P62424	P62424
RPL23A	60S ribosomal protein L23a	0.0313345	0.0746768	-0.0774084	-0.00906068	-0.0882951	-0.117708	4	4	4	30.1	30.1	30.1	17.695	0	24.774	201940000	9	P62750	P62750
RPS6	40S ribosomal protein S6	0.000809431	0.415023	-0.323893	-0.0465485	-0.0284091	-0.145522	5	5	5	18.5	18.5	18.5	28.68	0	29.502	105620000	6	P62753	P62753
HIST1H4A	Histone H4	-0.0257578	0.339253	-0.349496	-0.19977	-0.340753	-0.349345	7	7	7	53.4	53.4	53.4	11.367	0	199.02	3795600000	37	P62805	P62805
RAN	GTP-binding nuclear protein Ran	-0.0296926	-1.88846	-0.283693	-0.0476593	0.703813	0.855308	11	11	11	41.2	41.2	41.2	24.423	0	153.02	1033300000	42	P62826	P62826
RPL23	60S ribosomal protein L23	-0.356172	0.0688355	0.489561	-0.0975265	0.340162	0.0329076	2	2	2	20	20	20	14.865	0	16.492	22393000	3	P62829	P62829
RPS25	40S ribosomal protein S25	0.255416	0.52114	-0.129001	0.0843422	-0.0805759	-0.0491575	2	2	2	16	16	16	13.742	0	30.605	80178000	5	P62851	P62851
RPS26;RPS26P11	40S ribosomal protein S26;Putative 40S ribosomal protein S26-like 1	NaN	-0.124098	0.188173	NaN	0.117371	-0.0597548	3	3	3	36.5	36.5	36.5	13.015	0	18.592	48324000	5	P62854;Q5JNZ5	P62854;Q5JNZ5
RPS28	40S ribosomal protein S28	0.460795	-0.501908	-0.0204431	-0.0191732	0.337176	0.136255	2	2	2	33.3	33.3	33.3	7.8409	0	323.31	287430000	10	P62857	P62857
GNB1;GNB2;GNB4	Guanine nucleotide-binding protein G(I)/G(S)/G(T) subunit beta-1;Guanine nucleotide-binding protein G(I)/G(S)/G(T) subunit beta-2;Guanine nucleotide-binding protein subunit beta-4	-0.125877	-0.545523	0.130867	-0.325848	0.213463	0.178379	1	1	1	2.9	2.9	2.9	37.377	0.0022624	6.1296	52154000	4	P62873;P62879;Q9HAV0	P62873;P62879;Q9HAV0
RPL30	60S ribosomal protein L30	-0.0331391	-0.704207	0.231164	0.351432	-0.174904	-0.145271	3	3	3	34.8	34.8	34.8	12.784	0	21.219	55120000	5	P62888	P62888
RPL10A	60S ribosomal protein L10a	0.383801	-0.840897	-0.082576	-0.0730932	0.280201	0.471849	4	4	4	21.2	21.2	21.2	24.831	0	60.754	198640000	13	P62906	P62906
RPL11	60S ribosomal protein L11	0.304123	-1.13102	NaN	0.0103199	0.0957117	NaN	1	1	1	7.9	7.9	7.9	20.252	0	6.7447	90075000	3	P62913	P62913
RPL8	60S ribosomal protein L8	0.661946	0.346194	0.14981	-0.144066	-0.0774639	-0.0811579	3	3	3	10.9	10.9	10.9	28.024	0	18.159	47576000	6	P62917	P62917
PPIA	Peptidyl-prolyl cis-trans isomerase A;Peptidyl-prolyl cis-trans isomerase A, N-terminally processed	0.127195	0.192727	1.01419	0.102101	0.125004	-0.0391361	7	7	7	64.2	64.2	64.2	18.012	0	50.705	737560000	20	P62937;Q9Y536;F5H284;P0DN37;P0DN26;A0A0B4J2A2;A0A075B767;A0A075B759	P62937
FKBP1A	Peptidyl-prolyl cis-trans isomerase FKBP1A	0.0487311	-0.0210507	NaN	-0.0867197	0.0634016	NaN	1	1	1	12	12	12	11.951	0	7.5686	45929000	2	P62942	P62942
RPS27A;UBC;UBB;UBA52	Ubiquitin-40S ribosomal protein S27a;Ubiquitin;40S ribosomal protein S27a;Polyubiquitin-C;Ubiquitin;Polyubiquitin-B;Ubiquitin;Ubiquitin-60S ribosomal protein L40;Ubiquitin;60S ribosomal protein L40	-0.340872	-0.0336092	0.666702	0.166933	-0.0656539	-0.209021	5	5	5	35.9	35.9	35.9	17.965	0	49.906	211180000	12	P62979;P0CG48;P0CG47;P62987;A0A2R8Y422	P62979;P0CG48;P0CG47;P62987;A0A2R8Y422
TRA2A;TRA2B	Transformer-2 protein homolog alpha;Transformer-2 protein homolog beta	-0.134209	0.0511094	NaN	-0.175101	-0.0156643	NaN	1	1	1	3.5	3.5	3.5	32.688	1	-2	80646000	2	Q13595;P62995	Q13595;P62995
RAC1	Ras-related C3 botulinum toxin substrate 1	-0.194435	NaN	0.0348793	-0.605398	NaN	0.714229	2	2	2	14.6	14.6	14.6	21.45	0	11.634	6478400	2	P63000	P63000
YWHAZ	14-3-3 protein zeta/delta	0.103582	-0.341354	1.4604	-0.147366	0.0578096	-0.0281469	9	9	5	38	38	26.9	27.745	0	121.68	1747900000	40	P63104	P63104
DYNLL1;DYNLL2	Dynein light chain 1, cytoplasmic;Dynein light chain 2, cytoplasmic	0.212938	-0.418697	0.570499	0.179527	-0.0260477	0.028639	2	2	2	37.1	37.1	37.1	10.366	0	14.418	39967000	10	P63167;Q96FJ2	P63167;Q96FJ2
GNB2L1	Guanine nucleotide-binding protein subunit beta-2-like 1;Guanine nucleotide-binding protein subunit beta-2-like 1, N-terminally processed	NaN	0.502427	0.176538	NaN	-0.304642	-0.066285	4	4	4	19.6	19.6	19.6	35.076	0	24.521	36966000	4	P63244	P63244
ACTG1	Actin, cytoplasmic 2;Actin, cytoplasmic 2, N-terminally processed	-0.15613	-0.122043	1.0601	0.133093	0.133448	-0.198259	19	1	1	58.9	4.5	4.5	41.792	0	27.891	152970000	9	P63261	P63261
EEF1A1;EEF1A1P5	Elongation factor 1-alpha 1;Putative elongation factor 1-alpha-like 3	0.0732149	0.038612	0.377128	0.078617	0.0702565	0.0248449	16	16	16	46.3	46.3	46.3	50.14	0	323.31	3316000000	98	P68104;Q5VTE0;Q05639	P68104;Q5VTE0
TUBA1B;TUBA4A	Tubulin alpha-1B chain;Tubulin alpha-4A chain	-0.0495926	-0.230624	0.319808	0.0466117	0.108982	0.0290438	12	12	1	36.1	36.1	2.9	50.151	0	323.31	1442300000	66	P68363;P68366	P68363;P68366
TUBB4B;TUBB4A	Tubulin beta-4B chain;Tubulin beta-4A chain	0.226298	0.484634	-0.233915	0.00799304	-0.107607	-0.0238429	13	1	1	38.9	3.8	3.8	49.83	0	7.2879	134970000	6	P68371;P04350	P68371;P04350
HIST1H3A;HIST2H3A;HIST3H3;HIST2H3PS2	Histone H3.1;Histone H3.2;Histone H3.1t;Histone H3	0.441088	0.372482	-0.631251	-0.231925	-0.320393	-0.248215	5	5	2	24.3	24.3	7.4	15.404	0	119.6	11225000000	25	P68431;Q71DI3;Q16695;Q5TEC6;Q6NXT2	P68431;Q71DI3;Q16695;Q5TEC6
CCT2	T-complex protein 1 subunit beta	0.0525314	0.810025	0.659839	-0.0185817	-0.413029	-0.665141	4	4	4	10.8	10.8	10.8	57.488	0	26.293	49811000	7	P78371	P78371
GSTO1	Glutathione S-transferase omega-1	-0.483792	-0.790328	-0.160515	0.396237	0.430599	0.872685	2	2	2	10	10	10	27.566	0	12.793	61980000	6	P78417	P78417
RPL24	60S ribosomal protein L24	0.0109609	0.284374	-0.253298	-0.0809575	-0.175458	-0.394164	6	6	6	26.8	26.8	26.8	17.779	0	98.684	325850000	14	P83731	P83731
ERH	Enhancer of rudimentary homolog	0.675099	-0.783097	-0.711142	0.248041	0.408498	1.15876	4	4	4	52.9	52.9	52.9	12.259	0	106.94	625820000	9	P84090	P84090
H3F3A	Histone H3.3	0.354667	0.182548	-0.700914	-0.113782	-0.180416	-0.28307	5	2	2	24.3	7.4	7.4	15.328	0	30.755	91350000	5	P84243	P84243
SLC25A3	Phosphate carrier protein, mitochondrial	-1.5961	-1.5236	-1.44656	1.82845	1.54565	1.41762	8	8	8	16.6	16.6	16.6	40.094	0	286.51	1110100000	35	Q00325	Q00325
CLTC	Clathrin heavy chain 1	-0.0955752	0.0124017	0.376077	0.0835359	-0.0998843	0.278383	10	10	10	7.7	7.7	7.7	191.61	0	63.543	174450000	19	Q00610	Q00610
FKBP3	Peptidyl-prolyl cis-trans isomerase FKBP3	NaN	-0.34747	-0.342548	NaN	-0.113656	0.236581	2	2	2	10.3	10.3	10.3	25.177	0	12.063	31698000	3	Q00688	Q00688
HNRNPU	Heterogeneous nuclear ribonucleoprotein U	-0.121561	-0.332954	0.0522363	0.101512	0.180885	0.0635078	9	9	9	10.4	10.4	10.4	90.583	0	107.01	242170000	17	Q00839	Q00839
CAP1	Adenylyl cyclase-associated protein 1	-0.205515	NaN	2.1214	0.229815	NaN	-0.517885	2	2	2	7.6	7.6	7.6	51.901	0	13.014	14847000	4	Q01518	Q01518
PFKP	ATP-dependent 6-phosphofructokinase, platelet type	-1.61814	-0.876111	-1.41308	1.79815	1.06055	0.980415	23	23	21	32.8	32.8	30.7	85.595	0	207.37	898340000	52	Q01813;P08237	Q01813
RPL18A	60S ribosomal protein L18a	-0.114384	0.0759791	0.0783422	0.000184357	0.0207314	-0.0383828	4	4	4	19.3	19.3	19.3	20.762	0	27.523	254980000	15	Q02543	Q02543
FKBP4	Peptidyl-prolyl cis-trans isomerase FKBP4;Peptidyl-prolyl cis-trans isomerase FKBP4, N-terminally processed	0.357717	-0.422668	NaN	0.0702532	0.160815	NaN	2	2	2	7	7	7	51.804	0	11.958	22358000	3	Q02790	Q02790
RPL6	60S ribosomal protein L6	0.0864849	-0.10156	0.291343	0.120492	0.238796	-0.053259	4	4	4	12.8	12.8	12.8	32.728	0	211.09	64700000	10	Q02878	Q02878
EIF4G1	Eukaryotic translation initiation factor 4 gamma 1	-0.578303	-1.2251	NaN	0.0963556	0.249381	NaN	1	1	1	1.2	1.2	1.2	175.49	0	6.5375	6795500	2	Q04637	Q04637
PRDX1	Peroxiredoxin-1	0.307379	0.377719	0.0512273	0.0972367	0.0291417	-0.399451	7	7	6	43.7	43.7	38.2	22.11	0	224.9	416610000	23	Q06830	Q06830
RPL18	60S ribosomal protein L18	NaN	0.333001	0.253838	NaN	-0.200487	-0.121939	2	2	2	13.8	13.8	13.8	21.634	0	12.534	27942000	3	Q07020	Q07020
DHX9	ATP-dependent RNA helicase A	-0.517477	-0.681847	-0.450817	0.995398	-0.093402	-0.183204	2	2	2	2	2	2	140.96	0	11.802	24041000	4	Q08211	Q08211
ACACA	Acetyl-CoA carboxylase 1;Biotin carboxylase	-0.441545	0.266046	NaN	-0.392894	-0.3422	NaN	4	4	4	2.6	2.6	2.6	265.55	0	26.826	72419000	6	Q13085;O00763	Q13085
MTAP	S-methyl-5-thioadenosine phosphorylase	-0.0348674	NaN	-0.828062	-0.0656095	NaN	0.0690757	1	1	1	6	6	6	31.236	0.0043668	6.0626	6308600	2	Q13126	Q13126
HNRNPA0	Heterogeneous nuclear ribonucleoprotein A0	-0.0480762	-0.317718	-0.6531	0.0665818	0.173419	0.463189	5	5	5	19.3	19.3	19.3	30.84	0	77.592	473070000	17	Q13151	Q13151
CBX3	Chromobox protein homolog 3	0.172214	NaN	-0.239989	-0.170688	NaN	0.219232	1	1	1	3.8	3.8	3.8	20.811	0.0044248	6.0942	189860000	3	Q13185	Q13185
TRIM28	Transcription intermediary factor 1-beta	0.123016	-0.115835	NaN	0.16667	-0.00848496	NaN	4	4	4	7.7	7.7	7.7	88.549	0	48.448	45162000	7	Q13263	Q13263
G3BP1	Ras GTPase-activating protein-binding protein 1	NaN	-0.269221	-0.827705	NaN	0.221497	-0.535165	3	3	3	10.9	10.9	10.9	52.164	0	21.126	33460000	5	Q13283	Q13283
EIF3I	Eukaryotic translation initiation factor 3 subunit I	0.319263	0.0569382	-0.0788049	-0.150688	-0.401121	0.477106	5	5	5	19.7	19.7	19.7	36.501	0	48.081	70393000	10	Q13347	Q13347
TCOF1	Treacle protein	NaN	-0.0542072	-0.445289	NaN	-0.053498	-0.0208219	2	2	2	1.5	1.5	1.5	152.1	0	11.462	7591400	2	Q13428	Q13428
TUBB3	Tubulin beta-3 chain	0.268689	-0.041773	NaN	0.328261	-0.268717	NaN	7	1	1	20	3.8	3.8	50.432	0	7.2887	19542000	4	Q13509	Q13509
DDX39B	Spliceosome RNA helicase DDX39B	-0.210803	0.33374	-0.386405	-0.531674	-0.245852	-0.118955	5	5	4	18	18	10.5	48.991	0	103.68	61052000	6	Q13838;O00148	Q13838
HNRNPD	Heterogeneous nuclear ribonucleoprotein D0	0.300817	-0.121101	-0.800923	-0.0375761	0.107268	0.359624	3	2	2	11	8.7	8.7	38.434	0	12.967	57547000	5	Q14103	Q14103
GANAB	Neutral alpha-glucosidase AB	-0.134166	-0.116282	0.550386	-0.289099	0.218549	-0.143215	3	3	3	3.9	3.9	3.9	106.87	0	17.8	23661000	4	Q14697	Q14697
KPNB1	Importin subunit beta-1	-0.2957	-0.0323143	0.0789534	-0.03085	-0.142984	0.312152	5	5	5	6.8	6.8	6.8	97.169	0	30.01	92127000	8	Q14974	Q14974
EIF4H	Eukaryotic translation initiation factor 4H	-0.320287	0.173947	NaN	0.139379	0.218989	NaN	3	3	3	11.7	11.7	11.7	27.385	0	17.067	42529000	4	Q15056	Q15056
PDIA6	Protein disulfide-isomerase A6	-0.424236	-0.301819	NaN	0.482565	0.414081	NaN	1	1	1	2.3	2.3	2.3	48.121	0	288.73	72444000	2	Q15084	Q15084
PTGES3	Prostaglandin E synthase 3	0.601023	-0.458716	-0.271645	-0.150778	0.0287366	0.462086	4	4	4	24.4	24.4	24.4	18.697	0	24.429	128130000	7	Q15185	Q15185
NONO	Non-POU domain-containing octamer-binding protein	-0.157475	-0.0942332	0.0534787	0.105652	0.398812	0.062243	3	3	3	8.3	8.3	8.3	54.231	0	19.417	85230000	10	Q15233	Q15233
PCBP1	Poly(rC)-binding protein 1	0.388063	0.0329407	NaN	0.0612655	-0.501891	NaN	2	1	1	9.3	3.7	3.7	37.497	0	6.4238	6997400	2	Q15365	Q15365
PCBP2;PCBP3	Poly(rC)-binding protein 2;Poly(rC)-binding protein 3	0.171	NaN	-0.400994	0.0245873	NaN	-0.206415	4	4	3	17.3	17.3	11.8	38.58	0	70.556	52554000	8	Q15366;P57721	Q15366;P57721
MAPRE1	Microtubule-associated protein RP/EB family member 1	0.269783	0.0475273	-0.471907	0.115182	-0.117962	0.157028	3	3	3	20.1	20.1	20.1	29.999	0	21.309	47085000	7	Q15691	Q15691
UBE2V2	Ubiquitin-conjugating enzyme E2 variant 2	-0.0794722	0.0972379	NaN	-0.170329	0.175073	NaN	2	2	1	10.3	10.3	4.8	16.363	0	11.641	65157000	4	Q15819	Q15819
ZYX	Zyxin	0.231211	-0.424711	0.0920522	-0.428611	0.00794142	-0.00225002	1	1	1	2.6	2.6	2.6	61.277	0	6.7245	11707000	4	Q15942	Q15942
ADRM1	Proteasomal ubiquitin receptor ADRM1	NaN	0.285377	0.231926	NaN	-0.475851	-0.310166	2	2	2	6.1	6.1	6.1	42.153	0	11.827	10730000	3	Q16186	Q16186
CSRP2	Cysteine and glycine-rich protein 2	0.287794	-0.886047	NaN	0.561069	0.353043	NaN	1	1	1	10.9	10.9	10.9	20.954	0	7.0804	9081700	2	Q16527	Q16527
AARS2	Alanine--tRNA ligase, mitochondrial	NaN	0.763246	0.796073	NaN	0.253854	0.433102	1	1	1	0.9	0.9	0.9	107.34	0.0044346	6.0953	6196100	2	Q5JTZ9	Q5JTZ9
KPRP	Keratinocyte proline-rich protein	-0.243401	0.327595	0.0107703	-0.153236	-0.0629414	0.313857	4	4	4	8.1	8.1	8.1	64.135	0	95.135	448290000	9	Q5T749	Q5T749
XP32	Skin-specific protein 32	-0.171984	0.381195	-0.0412422	-0.100845	-0.0027895	-0.181677	3	3	3	12	12	12	26.238	0	17.96	35675000	5	Q5T750	Q5T750
RALGAPA1	Ral GTPase-activating protein subunit alpha-1	-0.453601	-0.311468	-0.712319	0.365276	0.354048	0.511487	1	1	1	0.3	0.3	0.3	229.83	0	14.268	448770000	5	Q6GYQ0	Q6GYQ0
NCEH1	Neutral cholesterol ester hydrolase 1	-1.21493	-2.3351	NaN	0.900337	1.8348	NaN	2	2	2	7.1	7.1	7.1	45.807	0	13.502	26312000	6	Q6PIU2	Q6PIU2
TUBA1C;TUBA1A;TUBA3E;TUBA8	Tubulin alpha-1C chain;Tubulin alpha-1A chain;Tubulin alpha-3E chain;Tubulin alpha-8 chain	0.136255	-0.336551	NaN	0.0638116	0.1813	NaN	12	1	1	36.3	2.9	2.9	49.895	0	6.2094	20614000	3	Q9BQE3;Q71U36;P0DPH8;P0DPH7;Q6PEY2;Q9NY65;A6NHL2	Q9BQE3;Q71U36;P0DPH8;P0DPH7;Q6PEY2;Q9NY65
PLD3	Phospholipase D3	-1.40597	-1.14954	-1.36207	1.44561	1.20228	1.30692	4	4	4	11.4	11.4	11.4	54.705	0	208.32	413810000	23	Q8IV08	Q8IV08
SRRM1	Serine/arginine repetitive matrix protein 1	0.260477	0.600415	-0.554883	0.1405	-0.0854542	-0.122839	1	1	1	1.1	1.1	1.1	102.33	0.006383	6.0078	18669000	3	Q8IYB3	Q8IYB3
HIST3H2BB	Histone H2B type 3-B	0.00959945	0.983962	-0.521365	-0.0499875	-0.601981	-0.438749	9	3	1	55.6	13.5	5.6	13.908	0	20.482	215430000	9	Q8N257;A0A2R8Y619	Q8N257
ZNF645	E3 ubiquitin-protein ligase ZNF645	NaN	0.796784	-1.31688	NaN	-0.44873	-0.572581	1	1	1	4.2	4.2	4.2	48.784	0.0065076	6.0467	84987000	2	Q8N7E2	Q8N7E2
SERBP1	Plasminogen activator inhibitor 1 RNA-binding protein	0.155701	0.625353	-0.0913773	-0.137407	-0.24931	-0.315918	6	6	6	14.7	14.7	14.7	44.965	0	54.457	281120000	18	Q8NC51	Q8NC51
LPCAT1	Lysophosphatidylcholine acyltransferase 1	0.408783	-0.39621	NaN	-0.395343	-0.173974	NaN	1	1	1	2.4	2.4	2.4	59.151	0	7.9967	8555700	2	Q8NF37	Q8NF37
H1FX	Histone H1x	-0.174172	0.328417	-0.707391	0.271834	0.107378	-0.356025	4	4	3	21.1	21.1	12.7	22.487	0	23.724	89713000	8	Q92522	Q92522
UFD1L	Ubiquitin fusion degradation protein 1 homolog	0.235078	-0.865371	-0.144876	-0.19059	0.263697	0.233631	1	1	1	3.3	3.3	3.3	34.5	0	6.3609	29454000	3	Q92890	Q92890
KHSRP	Far upstream element-binding protein 2	0.00580978	0.236332	-0.00600433	0.0154577	-0.0764034	-0.0125446	6	6	5	11.8	11.8	10.5	73.114	0	46.953	105100000	15	Q92945;Q96I24	Q92945
LRRC59	Leucine-rich repeat-containing protein 59	-0.0764642	0.274967	-0.490588	-0.0418615	-0.0276647	-0.0361705	6	6	6	23.1	23.1	23.1	34.93	0	36.846	185680000	12	Q96AG4	Q96AG4
HMCN1	Hemicentin-1	0.28131	0.888135	-0.781315	-0.345103	-0.687044	-0.516161	2	2	2	0.6	0.6	0.6	613.38	0	11.686	101360000000	24	Q96RW7	Q96RW7
PARK7	Protein deglycase DJ-1	0.208817	-0.192215	-0.484042	-0.431755	-0.220164	0.0941234	6	6	6	40.7	40.7	40.7	19.891	0	44.513	124040000	12	Q99497	Q99497
CCT7	T-complex protein 1 subunit eta	0.332153	0.24643	NaN	-0.174285	0.0413524	NaN	4	4	4	10.1	10.1	10.1	59.366	0	25.995	35088000	6	Q99832	Q99832
PRMT1	Protein arginine N-methyltransferase 1	0.213704	-0.727926	NaN	-0.206008	-0.181131	NaN	4	4	4	14.3	14.3	14.3	42.461	0	25.445	55393000	5	Q99873	Q99873
HIST1H2BL;HIST1H2BA	Histone H2B type 1-L;Histone H2B type 1-A	-0.0235634	0.881886	-0.283718	-0.153339	-0.577865	-0.540078	9	9	0	55.6	55.6	0	13.952	0	212.84	9110700000	57	Q99880;Q96A08	Q99880;Q96A08
PAIP2	Polyadenylate-binding protein-interacting protein 2	0.644295	NaN	0.0445443	-0.182372	NaN	1.0413	1	1	1	6.3	6.3	6.3	14.984	0.0064103	6.0128	145800000	4	Q9BPZ3	Q9BPZ3
ELAC2	Zinc phosphodiesterase ELAC protein 2	-0.0332416	-0.0721902	-0.104561	0.0740635	-0.20894	-0.15974	1	1	1	1.1	1.1	1.1	92.218	0	7.3301	39765000	3	Q9BQ52	Q9BQ52
C19orf43	Uncharacterized protein C19orf43	0.599405	0.800908	NaN	-0.348754	-0.112517	NaN	3	3	3	30.1	30.1	30.1	18.419	0	225.82	82475000	4	Q9BQ61	Q9BQ61
ACAT2	Acetyl-CoA acetyltransferase, cytosolic	-0.133495	-0.331838	-0.700467	-0.147002	-0.451315	0.172408	4	4	3	18.1	18.1	14.4	41.35	0	26.206	16702000	4	Q9BWD1	Q9BWD1
RBM4	RNA-binding protein 4	0.029755	NaN	0.415423	0.120581	NaN	-0.426066	2	2	2	6	6	6	40.313	0	11.174	8631800	2	Q9BWF3	Q9BWF3
HINT2	Histidine triad nucleotide-binding protein 2, mitochondrial	0.615555	0.213139	-0.711017	0.170385	0.00537139	0.336465	1	1	1	9.2	9.2	9.2	17.162	0	6.5828	16166000	3	Q9BX68	Q9BX68
RAB1B;RAB1C	Ras-related protein Rab-1B;Putative Ras-related protein Rab-1C	-0.33405	-1.05497	0.538805	0.0235018	0.382246	0.157977	3	3	3	14.9	14.9	14.9	22.171	0	18.402	35966000	9	Q9H0U4;Q92928;P62820;Q92930;P61006;P61026;P51153;P59190	Q9H0U4;Q92928
BCL11A	B-cell lymphoma/leukemia 11A	0.36045	0.874348	-0.920268	-0.338215	-0.70048	-0.497466	1	1	1	1.9	1.9	1.9	91.196	0	8.5196	12131000000	238	Q9H165	Q9H165
SH3BGRL3	SH3 domain-binding glutamic acid-rich-like protein 3	NaN	0.0936071	1.02461	NaN	0.00985694	-0.122496	1	1	1	7.5	7.5	7.5	10.438	0	14.268	58492000	2	Q9H299	Q9H299
BOLA2	BolA-like protein 2	0.493058	-0.277805	-1.06193	-0.363451	0.219474	0.615581	1	1	1	10.5	10.5	10.5	10.116	0.0043956	6.0811	41644000	3	Q9H3K6	Q9H3K6
RNPEP	Aminopeptidase B	-0.259565	NaN	-0.0302725	-0.284645	NaN	0.29442	2	2	2	3.8	3.8	3.8	72.595	0	13.145	11587000	3	Q9H4A4	Q9H4A4
RTN4	Reticulon-4	0.2457	NaN	0.0846385	-0.113568	NaN	0.177194	3	3	3	2.5	2.5	2.5	129.93	0	18.06	17598000	3	Q9NQC3	Q9NQC3
AASDHPPT	L-aminoadipate-semialdehyde dehydrogenase-phosphopantetheinyl transferase	-0.149861	0.0815579	NaN	-0.265344	-0.159606	NaN	1	1	1	4.9	4.9	4.9	35.776	0	7.1634	14676000	2	Q9NRN7	Q9NRN7
PHPT1	14 kDa phosphohistidine phosphatase	NaN	0.0203809	-0.819904	NaN	-0.173446	0.282866	1	1	1	7.2	7.2	7.2	13.832	0	12.21	84718000	3	Q9NRX4	Q9NRX4
RCC2	Protein RCC2	0.085556	0.0131322	-0.244584	-0.110534	-0.132859	-0.116957	4	4	4	5.7	5.7	5.7	56.084	0	23.222	40069000	6	Q9P258	Q9P258
ZNF624	Zinc finger protein 624	0.0397226	0.707847	NaN	-0.422859	-0.412908	NaN	1	1	1	1.6	1.6	1.6	99.928	0.0063966	6.0081	258970000	2	Q9P2J8	Q9P2J8
EIF3K	Eukaryotic translation initiation factor 3 subunit K	0.495041	-0.676217	-0.427195	-0.220798	0.0110437	0.420871	3	3	3	16.1	16.1	16.1	25.059	0	18.523	72217000	6	Q9UBQ5	Q9UBQ5
ZBTB47	Zinc finger and BTB domain-containing protein 47	-0.0116354	0.834808	NaN	-0.263528	-0.585366	NaN	1	1	1	2	2	2	82.759	1	-2	150180000	2	Q9UFB7	Q9UFB7
CYB5R1	NADH-cytochrome b5 reductase 1	0.506762	0.150686	NaN	-0.196183	-0.396702	NaN	1	1	1	3.3	3.3	3.3	34.094	0	6.4541	5623400	2	Q9UHQ9	Q9UHQ9
PFDN2	Prefoldin subunit 2	0.352885	NaN	-0.758139	0.101712	NaN	0.653407	3	3	3	20.1	20.1	20.1	16.648	0	20.345	41017000	3	Q9UHV9	Q9UHV9
ZNF215	Zinc finger protein 215	0.0834609	0.775556	-0.689714	-0.300698	-0.511579	-0.40802	1	1	1	2.9	2.9	2.9	60.034	0	18.442	87656000000	24	Q9UL58	Q9UL58
PA2G4	Proliferation-associated protein 2G4	0.475865	-0.445076	0.151236	0.0438208	0.142302	0.36651	3	3	3	10.4	10.4	10.4	43.786	0	18.951	62409000	5	Q9UQ80	Q9UQ80
NIP7	60S ribosome subunit biogenesis protein NIP7 homolog	NaN	-0.0143324	0.324077	NaN	-0.0676012	-0.156326	1	1	1	5.6	5.6	5.6	20.462	0	6.252	14065000	2	Q9Y221	Q9Y221
PIN4	Peptidyl-prolyl cis-trans isomerase NIMA-interacting 4	0.100777	-0.0264536	-0.768896	-0.111863	-0.3983	-0.113356	2	2	2	13.7	13.7	13.7	13.81	0	34.868	153960000	5	Q9Y237	Q9Y237
NUDC	Nuclear migration protein nudC	NaN	-0.152778	-0.504483	NaN	-0.4196	0.0781758	1	1	1	4.5	4.5	4.5	38.242	0	6.5174	17256000	2	Q9Y266	Q9Y266
LSM4	U6 snRNA-associated Sm-like protein LSm4	NaN	-0.244287	-0.665827	NaN	-0.134956	-0.350117	1	1	1	8.6	8.6	8.6	15.35	1	-2	18913000	2	Q9Y4Z0	Q9Y4Z0
PPME1	Protein phosphatase methylesterase 1	-1.66243	-2.08056	-1.16073	1.91832	1.74929	1.02314	3	3	3	14.2	14.2	14.2	42.315	0	19.516	99914000	10	Q9Y570	Q9Y570
PSAT1	Phosphoserine aminotransferase	NaN	-0.238129	-0.335319	NaN	-0.411993	0.446664	2	2	2	5.7	5.7	5.7	40.422	0	11.796	11088000	3	Q9Y617	Q9Y617
CLIC4	Chloride intracellular channel protein 4	-0.165951	NaN	-0.0326437	0.193835	NaN	-0.0625938	1	1	1	4.7	4.7	4.7	28.772	0	6.3008	31503000	2	Q9Y696	Q9Y696

## Sheet: Fig. 4F data
Identified proteins (in at least 2 of 3 biological replicates) in volcano plot Fig. 4F (6Yn-Pro+H2O2+NRH vs 6Yn-Pro+H2O2+NRH+Olaparib)
Gene names	Protein names	6Yn-Pro+N+H 1 (Log2 intensity)	6Yn-Pro+N+H 2 (Log2 intensity)	6Yn-Pro+N+H 3 (Log2 intensity)	6Yn-Pro+N+H+O 1 (Log2 intensity)	6Yn-Pro+N+H+O 2 (Log2 intensity)	6Yn-Pro+N+H+O 3 (Log2 intensity)	Peptides	Razor + unique peptides	Unique peptides	Sequence coverage [%]	Unique + razor sequence coverage [%]	Unique sequence coverage [%]	Mol. weight [kDa]	Q-value	Score	Intensity	MS/MS count	Protein IDs	Majority protein IDs
SIK1;LOC102724428	Serine/threonine-protein kinase SIK1	-0.244667	-0.516709	-0.4114	-0.214463	-0.42115	0.0690171	1	1	1	2.8	2.8	2.8	84.901	0.0065359	6.0543	1676700000	6	P57059;A0A0B4J2F2	P57059;A0A0B4J2F2
RAP1B;RAP1A	Ras-related protein Rap-1b;Ras-related protein Rap-1A;Ras-related protein Rap-1b-like protein	-0.122214	0.105639	NaN	-0.697039	0.374188	NaN	2	2	2	12	12	12	20.825	0	15.677	106210000	3	P61224;P62834;A6NIZ1	P61224;P62834;A6NIZ1
SNRPG;SNRPGP15	Small nuclear ribonucleoprotein G;Putative small nuclear ribonucleoprotein G-like protein 15	0.336661	0.62101	0.768443	-0.652164	0.944757	-0.391632	2	2	2	19.7	19.7	19.7	8.496	0	12.459	216200000	7	P62308;A8MWD9	P62308;A8MWD9
HMGB1;HMGB1P1	High mobility group protein B1;Putative high mobility group protein B1-like 1	0.195454	0.117652	0.397742	0.241177	-0.0551513	0.421247	1	1	1	7.4	7.4	7.4	24.893	0	6.5375	24756000	3	P09429;B2RPK0	P09429;B2RPK0
CLIC1	Chloride intracellular channel protein 1	0.137737	0.334171	0.319906	-0.163704	0.00783849	0.00691986	5	5	5	39.8	39.8	39.8	26.922	0	48.327	61957000	11	O00299	O00299
DDX3X;DDX3Y	ATP-dependent RNA helicase DDX3X;ATP-dependent RNA helicase DDX3Y	-0.302257	0.345849	-0.177242	0.182952	0.0421355	-0.221286	4	4	4	8.2	8.2	8.2	73.243	0	23.494	62585000	7	O00571;O15523	O00571;O15523
MAN2B1	Lysosomal alpha-mannosidase;Lysosomal alpha-mannosidase A peptide;Lysosomal alpha-mannosidase B peptide;Lysosomal alpha-mannosidase C peptide;Lysosomal alpha-mannosidase D peptide;Lysosomal alpha-mannosidase E peptide	0.345379	-0.0337527	0.800352	-0.55759	-0.00555134	0.0105107	1	1	1	1.6	1.6	1.6	113.74	0	6.6873	23536000	5	O00754	O00754
TPP1	Tripeptidyl-peptidase 1	0.708864	NaN	1.47719	0.714407	NaN	1.76847	2	2	2	3.7	3.7	3.7	61.247	0	12.324	22035000	2	O14773	O14773
PSMA7	Proteasome subunit alpha type-7	-0.832366	0.170085	-0.0628434	0.0957128	-0.167934	-0.0333534	3	3	3	13.7	13.7	13.7	27.887	0	21.471	67209000	9	O14818;Q8TAA3	O14818
HNRNPDL	Heterogeneous nuclear ribonucleoprotein D-like	-0.129768	-0.0378249	0.15406	-0.383852	-0.0632591	-0.334182	3	3	2	5.2	5.2	3.3	46.437	0	190.87	134670000	7	O14979;Q9ULL8;REV__Q8N0S2;REV__Q9ULL8	O14979
EIF3H	Eukaryotic translation initiation factor 3 subunit H	-0.214026	0.0954249	NaN	-0.136087	0.0605111	NaN	1	1	1	5.4	5.4	5.4	39.93	0	32.219	26966000	4	O15372	O15372
STX7	Syntaxin-7	-0.388338	0.269519	NaN	-0.238879	0.460327	NaN	1	1	1	5.4	5.4	5.4	29.815	0	7.0285	57242000	3	O15400	O15400
ACTN4	Alpha-actinin-4	-0.175161	-0.0289575	0.178495	0.21921	0.0734874	-0.150027	4	4	4	6	6	6	104.85	0	24.467	32987000	6	O43707;P12814;P35609;Q08043	O43707
SNX3	Sorting nexin-3	-0.210011	0.0124792	0	0.119691	-0.160653	0.264123	3	3	3	21.6	21.6	21.6	18.762	0	18.306	119320000	8	O60493	O60493
HIST1H2BH;HIST1H2BN;HIST1H2BC;HIST1H2BD;HIST1H2BK;HIST2H2BF;HIST1H2BM;H2BFS	Histone H2B type 1-H;Histone H2B type 1-N;Histone H2B type 1-C/E/F/G/I;Histone H2B type 1-D;Histone H2B type 1-K;Histone H2B type 2-F;Histone H2B type 1-M;Histone H2B type F-S	-0.0572483	-0.549756	-0.522542	0.237375	-0.581528	0.460277	9	1	0	55.6	5.6	0	13.892	0	6.9355	1443300000	4	Q93079;Q99877;P62807;P58876;O60814;Q5QNW6;Q99879;P57053	Q93079;Q99877;P62807;P58876;O60814;Q5QNW6;Q99879;P57053
H2AFY	Core histone macro-H2A.1	-0.0247385	-0.072216	-0.322566	-0.156768	0.086798	-0.206231	3	3	3	13.2	13.2	13.2	39.617	0	23.269	73799000	9	O75367	O75367
SEC22B	Vesicle-trafficking protein SEC22b	-0.0178322	NaN	0.399855	-0.0779029	NaN	-0.379444	1	1	1	4.2	4.2	4.2	24.593	0	6.159	28386000	2	O75396	O75396
ATP5H	ATP synthase subunit d, mitochondrial	0.062493	-0.0317762	NaN	-0.307467	-0.212781	NaN	2	2	2	20.5	20.5	20.5	18.491	0	12.884	21497000	10	O75947	O75947
RSL1D1	Ribosomal L1 domain-containing protein 1	NaN	0.0105871	-0.0923603	NaN	-0.0480274	0.256514	2	2	2	3.7	3.7	3.7	54.972	0	11.881	20105000	2	O76021	O76021
NDUFB8	NADH dehydrogenase [ubiquinone] 1 beta subcomplex subunit 8, mitochondrial	0.370005	0.49488	1.21294	0.308854	1.18384	-0.399835	1	1	1	5.4	5.4	5.4	21.766	0	6.1727	37758000	3	O95169	O95169
NDUFA7	NADH dehydrogenase [ubiquinone] 1 alpha subcomplex subunit 7	-0.233487	-0.438105	-0.0438573	0.102816	-0.420599	-0.0582182	2	2	2	29.2	29.2	29.2	12.551	0	13.422	25886000	5	O95182	O95182
LDHA	L-lactate dehydrogenase A chain	-0.0869192	-0.102467	-0.178468	0.093335	0.100455	0.00891185	8	8	7	25.9	25.9	22.3	36.688	0	323.31	427690000	22	P00338;P07864;Q6ZMR3	P00338
GOT2	Aspartate aminotransferase, mitochondrial	0.0104961	0.00638092	0.101126	-0.328777	-0.246003	-0.0527009	3	3	3	9.1	9.1	9.1	47.517	0	19.354	135180000	6	P00505	P00505
PGK1	Phosphoglycerate kinase 1	-0.087689	-0.0267327	-0.227378	-0.301244	-0.03333	-0.376339	6	6	6	20.4	20.4	20.4	44.614	0	238.28	212730000	16	P00558	P00558
ALDOA	Fructose-bisphosphate aldolase A	0.100604	0.127051	-0.0466841	0.0676696	0.106	-0.0707954	12	12	12	36	36	36	39.42	0	159.46	558500000	32	P04075;P09972;P05062	P04075
GAPDH	Glyceraldehyde-3-phosphate dehydrogenase	-0.288776	-0.37788	-0.237278	-0.186807	-0.292182	-0.224553	22	22	22	67.8	67.8	67.8	36.053	0	323.31	6625400000	132	P04406	P04406
ATP1A1	Sodium/potassium-transporting ATPase subunit alpha-1	0.301802	NaN	0.0852436	0.0901662	NaN	0.0658158	1	1	1	0.8	0.8	0.8	112.89	0.0065217	6.0494	17145000	2	P05023	P05023
SLC25A5	ADP/ATP translocase 2;ADP/ATP translocase 2, N-terminally processed	0.328682	0.262684	0.267373	0.164696	0.192445	0.183661	7	7	2	22.1	22.1	7.7	32.852	0	51.712	179120000	13	P05141;P12235;Q9H0C2	P05141
PCCA	Propionyl-CoA carboxylase alpha chain, mitochondrial	-0.464433	-0.300891	NaN	-0.422535	0.0582844	NaN	2	2	2	2.5	2.5	2.5	80.058	0	12.264	44549000	4	P05165	P05165
HMGN2	Non-histone chromosomal protein HMG-17	0.132165	0.211293	-0.658046	0.328785	-0.15238	-0.293049	2	2	2	25.6	25.6	25.6	9.3926	0	13.495	88281000	7	P05204	P05204
RPLP1	60S acidic ribosomal protein P1	0.963936	0.797653	NaN	0.264549	0.534884	NaN	1	1	1	14	14	14	11.514	0	6.3657	7006600	4	P05386	P05386
SSB	Lupus La protein	-0.206386	0.0356389	0.24198	-0.092419	0.0775007	-0.0914221	4	4	4	9.3	9.3	9.3	46.836	0	27.887	95922000	5	P05455	P05455
ATP5G1;ATP5G3;ATP5G2	ATP synthase F(0) complex subunit C1, mitochondrial;ATP synthase F(0) complex subunit C3, mitochondrial;ATP synthase F(0) complex subunit C2, mitochondrial	0.0183049	0.548175	0.43918	-0.225793	0.497425	-0.518162	1	1	1	5.1	5.1	5.1	14.277	0	75.717	285650000	6	P05496;P48201;Q06055	P05496;P48201;Q06055
ENO1	Alpha-enolase	0.243182	-0.0144459	0.0791591	0.208623	0.0332123	0.188697	16	16	16	49.1	49.1	49.1	47.168	0	261.56	805060000	40	P06733;P13929;P09104	P06733
GPI	Glucose-6-phosphate isomerase	-0.324822	-0.3756	-0.288813	-0.21448	-0.291735	-0.157746	9	9	9	22.9	22.9	22.9	63.146	0	103.99	753930000	27	P06744;CON__Q3ZBD7	P06744
NPM1	Nucleophosmin	0.0955597	0.191595	0.334041	-0.174832	0.356719	-0.163207	8	8	8	23.5	23.5	23.5	32.575	0	92.732	826380000	18	P06748	P06748
LDHB	L-lactate dehydrogenase B chain	-0.0193281	-0.0811725	-0.0151778	-0.0522105	-0.078932	0.221912	7	6	6	26.6	23.1	23.1	36.638	0	251.51	781630000	28	P07195	P07195
P4HB	Protein disulfide-isomerase	0.296483	0.269796	0.20418	0.522894	0.197857	-0.180315	2	2	2	3.9	3.9	3.9	57.116	0	11.931	19960000	4	P07237	P07237
H1F0	Histone H1.0;Histone H1.0, N-terminally processed	0.134414	-0.169218	-0.256664	0.18766	-0.287574	0.391219	4	4	4	20.6	20.6	20.6	20.863	0	54.89	277730000	13	P07305	P07305
CTSD	Cathepsin D;Cathepsin D light chain;Cathepsin D heavy chain	0.609544	0.528798	0.163764	0.139339	0.766595	0.319159	2	2	2	8.5	8.5	8.5	44.552	0	12.784	79410000	6	P07339	P07339
TUBB;TUBB2B;TUBB2A	Tubulin beta chain;Tubulin beta-2B chain;Tubulin beta-2A chain	0.00451547	0.126475	-0.0723168	-0.0385035	-0.100613	-0.0989763	15	15	2	45.7	45.7	7.2	49.67	0	191.34	1198500000	60	P07437;Q9BVA1;Q13885;Q3ZCM7;A6NNZ2;Q9BUF5;Q9H4B7;CON__ENSEMBL:ENSBTAP00000025008	P07437;Q9BVA1;Q13885
HEXB	Beta-hexosaminidase subunit beta;Beta-hexosaminidase subunit beta chain B;Beta-hexosaminidase subunit beta chain A	1.37135	0.713476	1.15756	1.13416	1.24418	1.39463	5	5	5	10.6	10.6	10.6	63.111	0	41.281	109600000	9	P07686	P07686
PFN1	Profilin-1	-0.0294631	0.222458	0.478657	-0.167629	0.222636	-0.314666	14	14	14	67.1	67.1	67.1	15.054	0	323.31	3305200000	96	P07737;CON__P02584	P07737
APRT	Adenine phosphoribosyltransferase	-0.238713	0.207771	-0.0707502	-0.262015	-0.064588	-0.573052	1	1	1	7.2	7.2	7.2	19.608	0	6.3441	16950000	3	P07741	P07741
CTSB	Cathepsin B;Cathepsin B light chain;Cathepsin B heavy chain	NaN	1.17179	0.61443	NaN	1.75427	0.859551	2	2	2	9.4	9.4	9.4	37.821	0	12.164	29375000	3	P07858	P07858
HSP90AA1	Heat shock protein HSP 90-alpha	0.144474	0.105973	0.025888	-0.0251356	0.207242	0.0462103	10	7	7	14.8	9.8	9.8	84.659	0	73.494	185870000	24	P07900;Q58FG0;Q58FG1	P07900
HNRNPC;HNRNPCL1;HNRNPCL3;HNRNPCL2;HNRNPCL4	Heterogeneous nuclear ribonucleoproteins C1/C2;Heterogeneous nuclear ribonucleoprotein C-like 1;Heterogeneous nuclear ribonucleoprotein C-like 3;Heterogeneous nuclear ribonucleoprotein C-like 2;Heterogeneous nuclear ribonucleoprotein C-like 4	-0.0606149	-0.0636528	-0.0749873	0.0857754	0.0440068	0.240299	9	9	7	25.5	25.5	21.9	33.67	0	323.31	444960000	14	P07910;O60812;B7ZW38;B2RXH8;P0DMR1;A0A0G2JPF8;A0A0G2JNQ3	P07910;O60812;B7ZW38;B2RXH8;P0DMR1;A0A0G2JPF8;A0A0G2JNQ3
HSP90AB1	Heat shock protein HSP 90-beta	0.144221	0.131559	0.00863481	-0.0259689	0.115932	0.0333154	11	11	8	15.6	15.6	10.6	83.263	0	254.52	1061100000	42	P08238;Q58FF8;Q58FF7;Q14568	P08238
VIM	Vimentin	-0.032448	-0.20479	0.0206593	-0.164819	-0.207108	0.0654377	22	21	19	45.9	44.4	40.6	53.651	0	323.31	1776100000	70	P08670;P17661;P41219;O43790;P14136;Q14533;P07196;P78386;Q16352;P07197;P78385;CON__P78386;CON__Q14533;CON__H-INV:HIT000292931;CON__P78385;CON__O43790;CON__Q61726;CON__Q6NT21	P08670
RPS17	40S ribosomal protein S17	0.0549689	0.0170017	-0.00658917	-0.0461041	-0.545212	0.00446153	3	3	3	31.1	31.1	31.1	15.55	0	23.095	80111000	8	P08708	P08708
ANXA5	Annexin A5	0.0752414	-0.0138729	NaN	-0.0743402	0.0383258	NaN	2	2	2	10	10	10	35.936	0	11.733	38665000	3	P08758	P08758
GSTP1	Glutathione S-transferase P	NaN	0.212997	-0.190524	NaN	-0.490059	-0.342586	2	2	2	12.4	12.4	12.4	23.356	0	11.949	19048000	3	P09211	P09211
HNRNPA1;HNRNPA1L2	Heterogeneous nuclear ribonucleoprotein A1;Heterogeneous nuclear ribonucleoprotein A1, N-terminally processed;Heterogeneous nuclear ribonucleoprotein A1-like 2	0.067916	0.0529388	0.0343425	0.038627	0.0549208	0.131743	7	7	7	22.6	22.6	22.6	38.746	0	199.21	443870000	25	P09651;Q32P51;A0A2R8Y4L2	P09651;Q32P51
PARP1	Poly [ADP-ribose] polymerase 1	0.787749	0.659775	NaN	0.18148	0.00308049	NaN	7	7	7	6.4	6.4	6.4	113.08	0	73.588	96426000	11	P09874	P09874
UCHL1	Ubiquitin carboxyl-terminal hydrolase isozyme L1	0.294339	0.135491	NaN	0.313113	0.0519346	NaN	2	2	2	8.5	8.5	8.5	24.824	0	12.089	21517000	2	P09936	P09936
HIST2H2AA3;HIST1H2AG;HIST1H2AJ;H2AFJ;HIST2H2AC;HIST1H2AH;HIST1H2AC;HIST1H2AA;H2AFX;HIST2H2AB	Histone H2A type 2-A;Histone H2A type 1;Histone H2A type 1-J;Histone H2A.J;Histone H2A type 2-C;Histone H2A type 1-H;Histone H2A type 1-C;Histone H2A type 1-A;Histone H2AX;Histone H2A type 2-B	-0.160534	-0.308968	-0.17853	0.742801	-0.286265	0.121558	6	6	1	40.8	40.8	5.4	14.095	0	84.162	2123800000	22	Q6FI13;P0C0S8;Q99878;Q9BTM1;Q16777;Q96KK5;Q93077;Q96QV6;P16104;Q8IUE6;REV__Q8NB25	Q6FI13;P0C0S8;Q99878;Q9BTM1;Q16777;Q96KK5;Q93077;Q96QV6;P16104;Q8IUE6
UQCRFS1;UQCRFS1P1	Cytochrome b-c1 complex subunit Rieske, mitochondrial;Cytochrome b-c1 complex subunit 11;Putative cytochrome b-c1 complex subunit Rieske-like protein 1	-0.227763	NaN	-0.152866	0.0152919	NaN	-0.0432795	2	2	2	12.8	12.8	12.8	29.668	0	13.837	45805000	2	P47985;P0C7P4	P47985;P0C7P4
HSPA1A;HSPA1B	Heat shock 70 kDa protein 1A;Heat shock 70 kDa protein 1B	-0.0589989	-0.101491	-0.0974724	-0.0336957	-0.10222	0.0825922	16	16	11	36.7	36.7	27	70.051	0	323.31	916740000	39	P0DMV8;P0DMV9;P34931	P0DMV8;P0DMV9
HIST1H1E	Histone H1.4	-0.0305077	-0.237165	-0.299019	0.210982	-0.323726	0.320159	26	26	10	66.7	66.7	29.7	21.865	0	323.31	53440000000	224	P10412;Q02539;P16401;P22492	P10412
TXN	Thioredoxin	-0.132004	-0.138914	0.425221	0.942887	-0.32083	-0.347988	3	3	3	21.9	21.9	21.9	11.737	0	17.201	146700000	5	P10599	P10599
CTSA	Lysosomal protective protein;Lysosomal protective protein 32 kDa chain;Lysosomal protective protein 20 kDa chain	1.46744	1.7432	1.42607	1.55698	1.61327	1.94345	6	6	6	18.3	18.3	18.3	54.465	0	116.52	425140000	17	P10619	P10619
ESD	S-formylglutathione hydrolase	0.205497	0.0130589	NaN	0.0432707	0.101724	NaN	3	3	3	18.8	18.8	18.8	31.462	0	20.168	16442000	3	P10768	P10768
HSPD1	60 kDa heat shock protein, mitochondrial	0.0772682	-0.0680796	0.116163	-0.63303	-0.189978	0	9	9	9	20.1	20.1	20.1	61.054	0	129.67	196400000	18	P10809	P10809
HSPA5	78 kDa glucose-regulated protein	0.749371	0.417061	0.293706	0.708127	0.695523	0.786819	9	9	9	20.3	20.3	20.3	72.332	0	55.477	159850000	17	P11021	P11021
ACP2	Lysosomal acid phosphatase	2.1556	NaN	1.61566	2.35362	NaN	2.09387	5	5	5	17.7	17.7	17.7	48.344	0	317.21	195380000	9	P11117	P11117
HSPA8	Heat shock cognate 71 kDa protein	0.0284082	-0.0765464	-0.109982	-0.000664234	-0.148667	-0.00479341	10	8	8	22	18.6	18.6	70.897	0	58.8	326720000	18	P11142;P54652	P11142
PABPC1;PABPC4	Polyadenylate-binding protein 1;Polyadenylate-binding protein 4	NaN	0.302877	0.0896099	NaN	0.0721002	-0.0685232	1	1	1	1.6	1.6	1.6	70.67	0	6.2152	26361000	3	P11940;Q13310	P11940;Q13310
PCNA	Proliferating cell nuclear antigen	-0.282289	-0.0361975	NaN	-0.15204	-0.195008	NaN	3	3	3	21.1	21.1	21.1	28.768	0	18.788	18505000	7	P12004	P12004
CKB	Creatine kinase B-type	-0.00471979	0.035538	0.297	-0.0471942	0.00733805	-0.0814143	11	11	11	32.5	32.5	32.5	42.644	0	88.846	590700000	42	P12277;P06732	P12277
XRCC6	X-ray repair cross-complementing protein 6	0.0891402	NaN	-0.317209	0.189518	NaN	0.159098	3	3	3	4.4	4.4	4.4	69.842	0	17.726	23473000	6	P12956	P12956
XRCC5	X-ray repair cross-complementing protein 5	-0.143162	-0.038371	0.0521941	0.039923	0.114681	-0.750447	2	2	2	3.6	3.6	3.6	82.704	0	11.992	34575000	3	P13010	P13010
EEF2	Elongation factor 2	-0.000184357	0.0121062	0.0287588	0.0020647	-0.0128913	-0.0767858	16	16	15	21.2	21.2	20	95.337	0	183.07	901150000	37	P13639	P13639
PLS3	Plastin-3	-0.187918	0.0637441	-0.0814205	-0.0704018	-0.2116	0.0364617	3	3	3	5.1	5.1	5.1	70.81	0	33.38	92840000	6	P13797;P13796	P13797
ETFA	Electron transfer flavoprotein subunit alpha, mitochondrial	-0.054693	0.0757313	NaN	0.596694	-0.328044	NaN	1	1	1	4.8	4.8	4.8	35.079	0	6.1811	4343500	2	P13804	P13804
MIF	Macrophage migration inhibitory factor	1.01647	0.741877	2.23845	0.640583	0.910961	2.06457	4	4	4	41.7	41.7	41.7	12.476	0	76.268	1497100000	37	P14174	P14174
PKM	Pyruvate kinase PKM	0.040903	0.248404	-0.0174867	0.068928	0.0716704	-0.0472494	17	17	17	34.3	34.3	34.3	57.936	0	185.63	1198500000	32	P14618;P30613	P14618
HSP90B1	Endoplasmin	0.10223	-0.141476	-0.158685	-0.00518227	-0.20014	-0.162954	6	6	6	7.1	7.1	7.1	92.468	0	37.454	102080000	11	P14625;Q58FF3	P14625
SNRPB;SNRPN	Small nuclear ribonucleoprotein-associated proteins B and B;Small nuclear ribonucleoprotein-associated protein N	-0.106842	0.0852093	NaN	-0.371285	-0.121938	NaN	2	2	2	11.7	11.7	11.7	24.61	0	12.319	53513000	4	P14678;P63162	P14678;P63162
HNRNPL	Heterogeneous nuclear ribonucleoprotein L	-0.0483596	0.00685585	0.0559856	-0.180059	0.091879	-0.218693	9	9	9	19.4	19.4	19.4	64.132	0	64.541	493390000	24	P14866;Q8WVV9	P14866
JUP	Junction plakoglobin	-0.144976	-0.0392261	-0.260462	2.90047	-0.690583	-0.129172	5	5	5	8.3	8.3	8.3	81.744	0	54.842	440760000	13	P14923	P14923
AKR1B1	Aldose reductase	-0.258455	-0.217807	-0.0598143	0.0824205	-0.0846239	0.315228	6	6	6	19.9	19.9	19.9	35.853	0	35.403	56005000	8	P15121	P15121
EZR;RDX;MSN	Ezrin;Radixin;Moesin	0.0708596	-0.00758648	-0.0590465	0.113776	-0.175318	0.0110681	4	4	4	5.6	5.6	5.6	69.412	0	23.203	72218000	5	P15311;P35241;P26038;P35240	P15311;P35241;P26038
NME1	Nucleoside diphosphate kinase A	-0.0715973	-0.0739294	0.218555	-0.124845	0.0507199	0.0637945	5	5	1	34.2	34.2	9.2	17.149	0	38.749	865580000	18	P15531	P15531
RPS2	40S ribosomal protein S2	-0.0996274	-0.139813	0.00461078	-0.154824	-0.0840479	-0.155993	6	6	6	18.8	18.8	18.8	31.324	0	89.13	330470000	23	P15880	P15880
DSP	Desmoplakin	-0.367492	NaN	-0.123739	2.68548	NaN	-0.464236	14	14	14	5.2	5.2	5.2	331.77	0	107.14	147020000	16	P15924	P15924
HIST1H1D	Histone H1.3	-0.0498747	-0.327242	-0.374907	-0.0512258	-0.378933	0.15934	21	7	6	57.9	25.3	23.5	22.35	0	56.502	878490000	18	P16402;REV__P16402	P16402
HIST1H1C	Histone H1.2	-0.18621	-0.326747	-0.453343	0.0780646	-0.429012	0.244965	23	8	8	60.6	23	23	21.364	0	61.599	2264700000	36	P16403	P16403
PCSK2	Neuroendocrine convertase 2	-0.259264	-0.543635	-0.36279	0.0220798	-0.366666	-0.0224559	1	1	1	1.6	1.6	1.6	70.564	1	-2	120730000000	17	P16519	P16519
HSPA6;HSPA7	Heat shock 70 kDa protein 6;Putative heat shock 70 kDa protein 7	-0.00966913	-0.142428	0.0379962	-0.0725083	0.0873145	0.00063169	6	1	1	11.4	1.7	1.7	71.027	0	8.805	265450000	6	P17066;P48741	P17066;P48741
DDX5;DDX17	Probable ATP-dependent RNA helicase DDX5;Probable ATP-dependent RNA helicase DDX17	0.050043	NaN	0.118239	0.017277	NaN	-0.0849113	4	4	4	7.5	7.5	7.5	69.147	0	24.899	32459000	4	P17844;Q92841	P17844;Q92841
PFKL	ATP-dependent 6-phosphofructokinase, liver type	0.746014	-0.399934	0.817151	0.437943	-0.310617	0.650288	6	4	4	10.1	8.1	8.1	85.018	0	29.536	39243000	5	P17858	P17858
PSMC3	26S protease regulatory subunit 6A	0.313213	0.0919762	NaN	-0.076443	0.136603	NaN	1	1	1	1.6	1.6	1.6	49.203	0.0022676	6.1341	13166000	2	P17980	P17980
RPL35A	60S ribosomal protein L35a	0.066726	0.243822	0.184391	0.334294	0.151218	0.0748677	3	3	3	20	20	20	12.538	0	18.852	52477000	5	P18077	P18077
RPL7	60S ribosomal protein L7	-0.150516	0.520182	1.27875	0.000664234	0.746347	-1.02609	12	12	12	46.8	46.8	46.8	29.225	0	132.47	853840000	42	P18124	P18124
RPL17	60S ribosomal protein L17	0.0981408	NaN	-0.149017	0.0798372	NaN	0.299445	2	2	2	8.7	8.7	8.7	21.397	0	12.154	40440000	2	P18621	P18621
PGAM1;PGAM2;PGAM4	Phosphoglycerate mutase 1;Phosphoglycerate mutase 2;Probable phosphoglycerate mutase 4	0.439289	0.357017	0.0347128	0.0772858	0.470691	-0.0570416	5	5	5	18.9	18.9	18.9	28.804	0	31.536	57963000	9	P18669;P15259;Q8N0Y7	P18669;P15259;Q8N0Y7
NCL	Nucleolin	0.126839	0.077871	0.0660297	-0.0712986	0.0274457	-0.106433	10	10	10	16.1	16.1	16.1	76.613	0	72.686	105700000	17	P19338	P19338
HK1	Hexokinase-1	NaN	-0.134248	-0.219205	NaN	0.277371	-0.154324	2	2	2	3.1	3.1	3.1	102.48	0	12.184	18394000	2	P19367	P19367
PRPS1;PRPS1L1;PRPS2	Ribose-phosphate pyrophosphokinase 1;Ribose-phosphate pyrophosphokinase 3;Ribose-phosphate pyrophosphokinase 2	NaN	-0.0647443	-0.409474	NaN	-0.338836	-0.603834	2	2	2	7.9	7.9	7.9	34.834	0	11.415	9908800	2	P60891;P21108;P11908	P60891;P21108;P11908
FLNA	Filamin-A	-0.0778487	-0.0776374	0.0551902	0.324644	-0.154378	0.057386	27	27	27	14.8	14.8	14.8	280.74	0	183.47	655280000	57	P21333;O75369;Q14315	P21333
VDAC1	Voltage-dependent anion-selective channel protein 1	0.140151	0.284138	-0.148878	0.268582	0.481564	0.186625	2	2	2	12	12	12	30.772	0	13.399	36041000	4	P21796	P21796
SDHB	Succinate dehydrogenase [ubiquinone] iron-sulfur subunit, mitochondrial	-0.0646008	NaN	-0.308764	-0.291945	NaN	-0.00549734	1	1	1	3.2	3.2	3.2	31.629	0.0064795	6.0284	34250000	2	P21912	P21912
GART	Trifunctional purine biosynthetic protein adenosine-3;Phosphoribosylamine--glycine ligase;Phosphoribosylformylglycinamidine cyclo-ligase;Phosphoribosylglycinamide formyltransferase	NaN	-0.230211	-0.228786	NaN	-0.41384	0.0508591	2	2	2	3.1	3.1	3.1	107.77	0	12.001	10389000	3	P22102	P22102
SCP2	Non-specific lipid-transfer protein	0.10408	-0.144885	0.378377	-0.28178	0.224207	-0.188169	2	2	2	4.2	4.2	4.2	58.993	0	12.273	29273000	4	P22307	P22307
UBA1	Ubiquitin-like modifier-activating enzyme 1	0.178181	NaN	0.33589	0.0261537	NaN	-0.198372	5	5	5	5.1	5.1	5.1	117.85	0	31.881	70181000	7	P22314	P22314
SPRR2B;SPRR2D;SPRR2E;SPRR2A;SPRR2G	Small proline-rich protein 2B;Small proline-rich protein 2D;Small proline-rich protein 2E;Small proline-rich protein 2A;Small proline-rich protein 2G	-0.0566049	NaN	-0.451631	2.14954	NaN	-0.882283	1	1	1	18.1	18.1	18.1	7.9754	0	7.0071	76930000	2	P35325;P22532;P22531;P35326;Q9BYE4	P35325;P22532;P22531;P35326;Q9BYE4
HNRNPA2B1	Heterogeneous nuclear ribonucleoproteins A2/B1	-0.0258216	0.215133	0.362992	-0.164967	0.162047	-0.214322	12	12	12	45.3	45.3	45.3	37.429	0	323.31	1141200000	42	P22626	P22626
SFPQ	Splicing factor, proline- and glutamine-rich	-0.163941	1.32849	-0.0635066	0.0285181	0.435267	0.151728	3	3	3	5.1	5.1	5.1	76.149	0	17.888	39407000	6	P23246	P23246
PPIB	Peptidyl-prolyl cis-trans isomerase B	-0.083786	-0.0941888	0.251323	-0.274933	0.125072	-0.148608	3	3	3	11.1	11.1	11.1	23.742	0	39.264	61803000	6	P23284	P23284
RPS3	40S ribosomal protein S3	-0.065789	-0.00720632	-0.23504	-0.203747	0.0395736	-0.119441	4	4	4	13.2	13.2	13.2	26.688	0	23.557	86988000	5	P23396	P23396
AHCY	Adenosylhomocysteinase	-0.286591	0.100015	0.143343	-0.0447985	0.342073	0.0994464	5	5	5	11.8	11.8	11.8	47.716	0	29.934	89036000	11	P23526	P23526
CFL1	Cofilin-1	-0.0469763	0.385159	0.0628625	-0.0497111	0.031068	-0.395519	2	2	2	6.6	6.6	6.6	18.502	0	11.93	83245000	6	P23528	P23528
EIF4B	Eukaryotic translation initiation factor 4B	-0.244894	-0.157997	-0.318858	0.0465394	-0.429353	-0.11282	6	6	6	12.8	12.8	12.8	69.15	0	57.189	138640000	12	P23588	P23588
RPS12	40S ribosomal protein S12	-0.0445307	-0.0654908	0.571397	0.112306	0.284989	0.0203869	5	5	5	31.8	31.8	31.8	14.515	0	31.864	336360000	13	P25398	P25398
ATP5A1	ATP synthase subunit alpha, mitochondrial	0.0285034	0.165209	0.0283406	0.0515616	0.186696	0.032748	2	2	2	2.9	2.9	2.9	59.75	0	24.677	57610000	4	P25705	P25705
PSMA1	Proteasome subunit alpha type-1	-0.042224	-0.0358874	NaN	0.00344777	0.145285	NaN	4	4	4	15.2	15.2	15.2	29.555	0	25.311	83770000	8	P25786	P25786
RPL13	60S ribosomal protein L13	NaN	0.107687	0.0146444	NaN	-0.128671	-0.150483	3	3	3	15.2	15.2	15.2	24.261	0	17.959	37540000	3	P26373	P26373
PTBP1	Polypyrimidine tract-binding protein 1	-0.134542	-0.156999	-0.0697958	-0.275174	-0.0168335	-0.522927	7	7	6	16.2	16.2	16	57.221	0	52.78	109700000	14	P26599;O95758	P26599
EEF1G	Elongation factor 1-gamma	-0.0339347	0.033873	0.135285	-0.0601308	0.0459629	0.0690186	12	12	12	24.5	24.5	24.5	50.118	0	207.28	1023100000	47	P26641	P26641
RPL10;RPL10L	60S ribosomal protein L10;60S ribosomal protein L10-like	NaN	0.205776	0.0165775	NaN	0.148279	0.136299	1	1	1	5.6	5.6	5.6	24.604	0	6.7641	27976000	2	P27635;Q96L21	P27635;Q96L21
CALR	Calreticulin	-0.116517	-0.191843	-0.233652	-0.132187	-0.0219207	-0.24655	7	7	7	16.5	16.5	16.5	48.141	0	45.455	386020000	19	P27797	P27797
PSMA5	Proteasome subunit alpha type-5	-0.24851	-0.165309	-0.109902	-0.00616777	-0.0206587	0.0143342	3	3	3	14.9	14.9	14.9	26.411	0	45.084	377040000	6	P28066	P28066
PSMB5	Proteasome subunit beta type-5	-0.0594301	0.188146	0.477548	-0.21386	0.268002	-0.130431	7	7	7	32.7	32.7	32.7	28.48	0	83.13	188550000	22	P28074	P28074
TKT	Transketolase	-0.06508	NaN	0.0365906	0.385854	NaN	0.394939	2	2	2	2.9	2.9	2.9	67.877	0	11.698	8684700	3	P29401	P29401
PRDX3	Thioredoxin-dependent peroxide reductase, mitochondrial	0.098767	-0.0212791	-0.212638	-0.0354815	-0.0933251	0.0200955	2	2	2	9	9	9	27.692	0	12.853	29002000	5	P30048	P30048
RPL12	60S ribosomal protein L12	-0.0575499	0.0626047	0.408668	-0.241498	0.221174	-0.328735	8	8	8	59.4	59.4	59.4	17.818	0	108.55	711130000	28	P30050	P30050
PDIA3	Protein disulfide-isomerase A3	0.260779	0.138234	NaN	0.426145	0.37084	NaN	3	3	3	7.3	7.3	7.3	56.782	0	19.184	59006000	7	P30101	P30101
DNAJA1	DnaJ homolog subfamily A member 1	-0.194914	0.204849	0.0330545	-0.123896	0.0678118	-0.230626	2	2	2	8.1	8.1	8.1	44.868	0	12.236	35503000	3	P31689	P31689
HNRNPH1	Heterogeneous nuclear ribonucleoprotein H;Heterogeneous nuclear ribonucleoprotein H, N-terminally processed	0.197792	-0.347928	0.0277776	0.111492	-0.244935	0.000913978	9	9	8	28.1	28.1	24.3	49.229	0	64.055	262870000	24	P31943;P55795	P31943
YWHAB	14-3-3 protein beta/alpha;14-3-3 protein beta/alpha, N-terminally processed	0.296174	0.278349	0.681983	-0.859108	0.452629	-0.844733	6	2	2	25.6	14.6	14.6	28.082	0	12.838	58540000	5	P31946	P31946
SFN	14-3-3 protein sigma	-0.016828	0.148049	-0.175953	-0.261178	0.226274	-0.623341	6	4	4	28.2	21.4	21.4	27.774	0	108.55	276950000	9	P31947	P31947
STIP1	Stress-induced-phosphoprotein 1	0.00714737	-0.0244356	-0.0706919	-0.0562812	-0.266294	0.087711	2	2	2	3.1	3.1	3.1	62.639	0	12.052	23754000	6	P31948	P31948
PRDX2	Peroxiredoxin-2	-0.052256	-0.203885	0.0293806	0.549978	0.0872078	-0.0293949	4	3	3	23.2	17.7	17.7	21.892	0	18.791	151340000	14	P32119	P32119
DUT	Deoxyuridine 5-triphosphate nucleotidohydrolase, mitochondrial	0.053354	0.358659	0.566227	-0.428683	0.468381	-1.0373	5	5	5	19.8	19.8	19.8	26.563	0	256.63	500740000	22	P33316	P33316
SHMT2;SHMT1	Serine hydroxymethyltransferase, mitochondrial;Serine hydroxymethyltransferase, cytosolic	0.185903	0.114344	NaN	0.150206	0.0844012	NaN	2	2	2	5	5	5	55.992	0	12.322	42559000	3	P34897;P34896	P34897;P34896
HSPA4	Heat shock 70 kDa protein 4	0.394071	NaN	-0.0523878	-1.08469	NaN	-0.216004	6	6	4	8.9	8.9	6.3	94.33	0	35.396	46696000	8	P34932;O95757	P34932
PHB	Prohibitin	0.053227	-0.0412941	NaN	-0.178284	0.279096	NaN	3	3	3	13.6	13.6	13.6	29.804	0	21.945	21627000	5	P35232	P35232
RPL22	60S ribosomal protein L22	-0.0126216	0.135003	NaN	0.279897	0.0459578	NaN	4	4	4	32.8	32.8	32.8	14.787	0	26.556	159640000	10	P35268	P35268
MYH9	Myosin-9	-0.0770878	-0.0233774	-0.119067	0.025978	0.0615685	-0.135771	12	12	11	7.4	7.4	6.6	226.53	0	75.835	160500000	23	P35579;P35749	P35579
RPL4	60S ribosomal protein L4	0.112731	-0.301839	-0.143	-0.10743	-0.215855	0.00530148	6	6	6	12.6	12.6	12.6	47.697	0	211.09	179340000	17	P36578	P36578
TAGLN2	Transgelin-2	0.0125113	0.169122	0.159109	0.0257572	0.0933696	0.00162399	11	11	11	50.3	50.3	50.3	22.391	0	225.74	482150000	40	P37802;Q9UI15	P37802
TALDO1	Transaldolase	NaN	0.169082	0.538967	NaN	0.300819	-0.894367	4	4	4	11	11	11	37.54	0	23.837	72540000	5	P37837	P37837
RBMX	RNA-binding motif protein, X chromosome;RNA-binding motif protein, X chromosome, N-terminally processed	0.661776	0.501387	NaN	0.538599	0.583458	NaN	2	2	2	6.6	6.6	6.6	42.331	0	11.163	10369000	2	P38159	P38159
HSPA9	Stress-70 protein, mitochondrial	-0.305659	0.21996	0.358068	-0.0253361	0.145639	-0.53709	3	3	3	6.5	6.5	6.5	73.68	0	18.334	40372000	8	P38646	P38646
EIF4A3	Eukaryotic initiation factor 4A-III;Eukaryotic initiation factor 4A-III, N-terminally processed	0.0148152	-0.177211	-0.0651286	0.538132	-0.0750805	0.0102084	5	4	4	14.6	12.4	12.4	46.871	0	29.717	113570000	11	P38919	P38919
RPL3	60S ribosomal protein L3	0.102038	0.0175703	-0.0681643	0.139608	0.102118	0.16423	7	7	7	12.7	12.7	12.7	46.108	0	41.944	149560000	14	P39023;Q92901	P39023
CCT6A	T-complex protein 1 subunit zeta	0.123874	0.123485	NaN	0.277666	0.0340775	NaN	2	2	2	4.7	4.7	4.7	58.024	0	12.276	41770000	4	P40227	P40227
RPL13A	60S ribosomal protein L13a	-0.156061	0.0393984	NaN	0.132684	-0.260057	NaN	2	2	2	8.9	8.9	8.9	23.577	0	12.433	38692000	5	P40429	P40429
MDH1	Malate dehydrogenase, cytoplasmic	-0.497431	0.0499718	0.22246	0.461152	-0.00253248	0.588434	4	4	4	11.7	11.7	11.7	36.426	0	24.357	65991000	6	P40925	P40925
MDH2	Malate dehydrogenase, mitochondrial	-0.0893051	-0.0630735	0.14403	-0.0363749	0.0373477	-0.2198	3	3	3	10.1	10.1	10.1	35.503	0	20.138	70447000	9	P40926	P40926
EIF2S3;EIF2S3L	Eukaryotic translation initiation factor 2 subunit 3;Putative eukaryotic translation initiation factor 2 subunit 3-like protein	-0.0891531	-0.188661	0.119015	0.323181	-0.286741	0.0739429	1	1	1	3.4	3.4	3.4	51.109	0	6.4907	13641000	3	P41091;Q2VIR3	P41091;Q2VIR3
PNPLA4	Patatin-like phospholipase domain-containing protein 4	0.611634	NaN	0.186368	0.328841	NaN	0.222022	3	3	3	16.2	16.2	16.2	27.98	0	18.468	16096000	4	P41247	P41247
RPL35	60S ribosomal protein L35	0.134372	NaN	-0.301744	-0.134014	NaN	0.29072	2	2	2	14.6	14.6	14.6	14.551	0	11.28	23771000	2	P42766	P42766
MATR3	Matrin-3	-0.108722	0.0514679	0.0597395	-0.0117209	0.010627	0.136535	3	3	3	3.3	3.3	3.3	94.622	0	52.216	26923000	5	P43243	P43243
NAMPT	Nicotinamide phosphoribosyltransferase	-0.0896296	0.0146487	-0.171625	-0.0818902	0.00259256	-0.560277	1	1	1	1.8	1.8	1.8	55.52	0.0044743	6.1167	15612000	4	P43490	P43490
VDAC2	Voltage-dependent anion-selective channel protein 2	0.315285	0.0717455	0.385829	0.197061	0.0807074	0.28758	5	5	5	22.1	22.1	22.1	31.566	0	56.164	231360000	12	P45880	P45880
RPL27A	60S ribosomal protein L27a	-0.0914176	-0.103945	NaN	-0.0882072	-0.294897	NaN	3	3	3	29.1	29.1	29.1	16.561	0	18.6	34264000	5	P46776	P46776
RPL21	60S ribosomal protein L21	0.00146824	-0.130799	-0.367666	0.127428	0.0253197	0.658873	4	4	4	26.2	26.2	26.2	18.565	0	25.234	106380000	14	P46778	P46778
RPL28	60S ribosomal protein L28	0.135226	-0.167116	-0.0824838	0.143903	0.00253248	0.47938	3	3	3	19.7	19.7	19.7	15.747	0	18.244	39240000	7	P46779	P46779
RPS9	40S ribosomal protein S9	0.110432	-0.0543631	-0.0529187	0.106086	-0.239179	-0.259292	3	3	3	16.5	16.5	16.5	22.591	0	19.052	140690000	7	P46781	P46781
RPS5	40S ribosomal protein S5;40S ribosomal protein S5, N-terminally processed	0.196517	0.0899132	0.172656	-0.105333	-0.117026	0.0193489	8	8	8	47.1	47.1	47.1	22.876	0	107.78	326210000	24	P46782	P46782
RPS10	40S ribosomal protein S10	0.250998	-0.171652	0.0819105	0.0538869	0.184919	0.23752	1	1	1	5.5	5.5	5.5	18.898	0	18.823	163980000	3	P46783	P46783
RPL29	60S ribosomal protein L29	0.206571	-0.172436	-0.403234	0.207553	-0.185102	0.392653	4	4	4	23.3	23.3	23.3	17.752	0	24.896	123400000	11	P47914	P47914
ATP5O	ATP synthase subunit O, mitochondrial	-0.159965	-0.467826	-0.273922	-0.148211	-0.37349	0.154169	7	7	7	39	39	39	23.277	0	102.3	130810000	19	P48047	P48047
PREP	Prolyl endopeptidase	1.04155	0.526316	0.665961	0.563903	0.671693	0.671393	10	10	10	16.6	16.6	16.6	80.699	0	64.718	135040000	20	P48147	P48147
CCT5	T-complex protein 1 subunit epsilon	0.124922	0.0991559	NaN	0.535206	-0.240426	NaN	2	2	2	4.3	4.3	4.3	59.67	0	12.002	38365000	3	P48643	P48643
RPL34	60S ribosomal protein L34	0.0120346	-0.0473489	-0.0480989	0.0381417	-0.0883681	0.0987569	2	2	2	12	12	12	13.293	0	124.82	179020000	4	P49207	P49207
CCT3	T-complex protein 1 subunit gamma	0.0390856	0.172073	0.104928	0.0623727	-0.195904	-0.380887	3	3	3	6.4	6.4	6.4	60.533	0	17.729	42292000	6	P49368	P49368
TUFM	Elongation factor Tu, mitochondrial	-0.0982201	-0.118407	-0.156642	-0.160396	-0.0262419	-0.124058	6	6	6	19.9	19.9	19.9	49.541	0	69.21	78610000	14	P49411	P49411
HINT1	Histidine triad nucleotide-binding protein 1	0.0800342	0.0893072	0.373528	0.80575	0.237034	0.242794	2	2	2	19	19	19	13.802	0	18.722	99185000	8	P49773	P49773
SERPINH1	Serpin H1	-0.409447	-0.122664	-0.014129	-0.196121	-0.235215	0.049121	1	1	1	1.9	1.9	1.9	46.44	0	13.285	67042000	4	P50454	P50454
VASP	Vasodilator-stimulated phosphoprotein	-0.468611	-0.493986	0.00178981	-0.212293	-0.279177	0.205777	1	1	1	5.5	5.5	5.5	39.829	0	6.5052	426750000	4	P50552	P50552
RPL14	60S ribosomal protein L14	0.0751949	-0.155465	0.0756228	-0.0496694	0.162926	0.399671	3	3	3	14	14	14	23.432	0	18.296	23224000	7	P50914	P50914
CCT8	T-complex protein 1 subunit theta	0.598701	0.137259	NaN	0.311156	-0.0223498	NaN	2	2	2	3.5	3.5	3.5	59.62	0	11.703	52607000	4	P50990	P50990
CCT4	T-complex protein 1 subunit delta	0.364622	0.233908	-0.0923507	0.364394	0.0308387	0.103958	3	3	3	5.8	5.8	5.8	57.924	0	19.49	114640000	9	P50991	P50991
RAB5C	Ras-related protein Rab-5C	0.139688	NaN	0.274202	-0.229099	NaN	0.186516	1	1	1	5.6	5.6	5.6	23.482	0	6.4961	15591000	2	P51148	P51148
BCAP31	B-cell receptor-associated protein 31	0.146449	0.28472	0.429767	-0.152283	0.751414	-0.127051	2	2	2	7.7	7.7	7.7	27.991	0	12.052	50679000	3	P51572	P51572
PGD	6-phosphogluconate dehydrogenase, decarboxylating	0.190214	NaN	0.0465016	0.713372	NaN	0.0803118	3	3	3	7.9	7.9	7.9	53.139	0	18.523	21287000	4	P52209	P52209
HNRNPM	Heterogeneous nuclear ribonucleoprotein M	0.0506471	0.055619	-0.435666	-0.0269455	0.094841	0.571839	5	5	4	7.7	7.7	5.5	77.515	0	70.51	336750000	5	P52272	P52272
KPNA2	Importin subunit alpha-1	0.248216	-0.473196	NaN	0.0488387	0.0988424	NaN	1	1	1	3.8	3.8	3.8	57.861	0.0044543	6.1028	9495000	2	P52292	P52292
ARHGDIA	Rho GDP-dissociation inhibitor 1	-0.3419	0.0211089	0.253425	-0.0874457	-0.0361886	-0.595116	4	4	4	27	27	27	23.207	0	35.768	122970000	16	P52565	P52565
HNRNPF	Heterogeneous nuclear ribonucleoprotein F;Heterogeneous nuclear ribonucleoprotein F, N-terminally processed	0.0345542	-0.150676	-1.17669	0.377667	-0.0344004	-0.236215	3	2	2	11.1	7	7	45.671	0	13.668	33596000	6	P52597	P52597
PPP5C;PPP5D1	Serine/threonine-protein phosphatase 5;Protein PPP5D1	0.33141	NaN	0.0105152	0.6586	NaN	-0.0614781	2	2	2	4	4	4	56.878	0	11.764	10149000	3	P53041;E7EU14	P53041;E7EU14
CTSC	Dipeptidyl peptidase 1;Dipeptidyl peptidase 1 exclusion domain chain;Dipeptidyl peptidase 1 heavy chain;Dipeptidyl peptidase 1 light chain	0.053113	-0.395654	-0.194784	0.247488	-0.15767	0.146034	2	2	2	7.6	7.6	7.6	51.853	0	14.689	39728000	5	P53634	P53634
VCP	Transitional endoplasmic reticulum ATPase	0.451022	0.0637347	NaN	0.0595986	0.136104	NaN	6	6	6	9.2	9.2	9.2	89.321	0	41.934	33376000	7	P55072	P55072
NPEPPS	Puromycin-sensitive aminopeptidase	0.336876	0.242101	0.273299	0.114052	0.180802	-0.00788927	1	1	1	1	1	1	103.28	0.0044053	6.0849	21365000	6	P55786	P55786
EPPK1	Epiplakin	-0.121277	0.0778195	NaN	0.193542	-0.113409	NaN	1	1	1	1.3	1.3	1.3	555.65	0	6.9296	12616000	2	P58107	P58107
TPI1	Triosephosphate isomerase	-0.00820655	-0.0235922	0.147132	-0.110747	0.222274	-0.231795	14	14	14	72.3	72.3	72.3	26.669	0	323.31	1836400000	70	P60174	P60174
MYL6	Myosin light polypeptide 6	-0.155681	0.265697	0.382655	-0.145312	-0.247492	-0.366274	5	5	5	43	43	43	16.93	0	36.166	128050000	21	P60660;P14649	P60660
ACTB	Actin, cytoplasmic 1;Actin, cytoplasmic 1, N-terminally processed	0.0408124	0.0287466	-0.131101	0.00904393	0.0774224	-0.0687103	19	19	1	58.9	58.9	4.5	41.736	0	323.31	10943000000	178	P60709;Q6S8J3;A5A3E0;P0CG38;Q562R1;P0CG39;Q9BYX7	P60709
EIF4A1;EIF4A2	Eukaryotic initiation factor 4A-I;Eukaryotic initiation factor 4A-II;Eukaryotic initiation factor 4A-II, N-terminally processed	0.134141	0.200618	0.0296183	0.00608218	0.0075866	-0.0326686	5	5	4	13.3	13.3	11.1	46.153	0	36.832	183990000	11	P60842;Q14240	P60842;Q14240
CDC42	Cell division control protein 42 homolog	0.0685193	-0.0205666	0.242571	-0.185649	-0.150688	-0.0838335	2	2	2	11	11	11	21.258	0	12.891	102390000	6	P60953	P60953
DSTN	Destrin	-0.115615	0.0027895	0.652256	0.931818	-0.149318	-0.90624	2	2	2	10.9	10.9	10.9	18.506	0	12.918	24821000	4	P60981	P60981
ACTR2	Actin-related protein 2	-0.0690374	NaN	-0.193281	0.307409	NaN	-0.433736	2	2	2	6.9	6.9	6.9	44.76	0	12.069	8820300	2	P61160	P61160
RPS3A	40S ribosomal protein S3a	0.202279	-0.0221115	-0.197958	-0.00527835	-0.177205	-0.332371	5	5	5	13.6	13.6	13.6	29.945	0	40.986	75249000	8	P61247	P61247
RPL15	60S ribosomal protein L15	-0.0361944	0.0760198	0.0320277	0.0365055	0.0179117	0.112198	5	5	5	22.5	22.5	22.5	24.146	0	34.473	338550000	19	P61313	P61313
RPL37	60S ribosomal protein L37	-0.42323	NaN	-0.545695	0.195186	NaN	0.142259	3	3	3	27.8	27.8	27.8	11.078	0	17.956	105450000	3	P61927	P61927
SUMO2	Small ubiquitin-related modifier 2	0.21233	0.318582	-0.0552257	0.560964	-0.0842851	0.342031	2	2	1	21.1	21.1	10.5	10.871	0	9.8777	88557000	3	P61956	P61956
HNRNPK	Heterogeneous nuclear ribonucleoprotein K	0.163752	0.154822	0.0735853	-0.0276849	0.0992762	-0.0265768	4	4	4	13.4	13.4	13.4	50.976	0	31.555	112550000	11	P61978	P61978
YWHAG	14-3-3 protein gamma;14-3-3 protein gamma, N-terminally processed	-0.16421	0.110166	NaN	-0.200392	-0.0161672	NaN	4	3	3	18.6	15.4	15.4	28.302	0	17.715	207630000	7	P61981	P61981
RPS8	40S ribosomal protein S8	0.0464309	0.0630479	-0.361272	-0.0083307	-0.154459	0.0640361	2	2	2	12.5	12.5	12.5	24.205	0	13.803	65836000	5	P62241	P62241
RPS15A	40S ribosomal protein S15a	0.0431587	0.128927	0.112791	-0.00269747	0.156839	-0.0293652	1	1	1	6.2	6.2	6.2	14.839	0	6.6317	122510000	3	P62244	P62244
RPS16	40S ribosomal protein S16	NaN	-0.00318229	-0.0416198	NaN	-0.176507	0.0550184	3	3	3	22.6	22.6	22.6	16.445	0	36.11	26222000	6	P62249	P62249
YWHAE	14-3-3 protein epsilon	0.0834206	0.0174131	0.257216	-0.337267	0.111666	-0.207032	6	5	5	35.3	32.2	32.2	29.174	0	110.56	202790000	11	P62258	P62258
RPS14	40S ribosomal protein S14	-0.469269	-0.00529003	0.148249	0.0364643	0.144359	0.0869104	5	5	5	31.8	31.8	31.8	16.273	0	36.353	156390000	11	P62263	P62263
RPS23	40S ribosomal protein S23	0.297671	-0.0955499	0.019878	-0.119147	-0.246073	0.136199	2	2	2	15.4	15.4	15.4	15.807	0	11.9	16399000	3	P62266	P62266
RPS11	40S ribosomal protein S11	0.0538068	0.256364	0.163512	-0.018489	-0.0765254	0.221987	5	5	5	23.4	23.4	23.4	18.431	0	30.247	156870000	10	P62280	P62280
SNRPE	Small nuclear ribonucleoprotein E	-0.184535	NaN	0.412282	0.0979278	NaN	0.752055	1	1	1	17.4	17.4	17.4	10.803	0	6.6572	73610000	3	P62304	P62304
RPL7A	60S ribosomal protein L7a	-0.0496919	-0.258733	-0.0463692	-0.0182098	-0.223325	-0.0306302	11	11	11	43.2	43.2	43.2	29.995	0	182.23	649950000	33	P62424	P62424
RPL23A	60S ribosomal protein L23a	-0.00906068	-0.0882951	-0.117708	-0.168552	-0.31004	-0.474967	4	4	4	30.1	30.1	30.1	17.695	0	24.774	201940000	9	P62750	P62750
RPS6	40S ribosomal protein S6	-0.0465485	-0.0284091	-0.145522	-0.0831503	-0.125477	-0.158114	5	5	5	18.5	18.5	18.5	28.68	0	29.502	105620000	6	P62753	P62753
HIST1H4A	Histone H4	-0.19977	-0.340753	-0.349345	0.0831603	-0.253657	0.237	7	7	7	53.4	53.4	53.4	11.367	0	199.02	3795600000	37	P62805	P62805
RAN	GTP-binding nuclear protein Ran	-0.0476593	0.703813	0.855308	-0.460921	0.660046	-0.79871	11	11	11	41.2	41.2	41.2	24.423	0	153.02	1033300000	42	P62826	P62826
RPL23	60S ribosomal protein L23	-0.0975265	0.340162	0.0329076	0.252449	-0.26562	-0.112064	2	2	2	20	20	20	14.865	0	16.492	22393000	3	P62829	P62829
RPS25	40S ribosomal protein S25	0.0843422	-0.0805759	-0.0491575	-0.414965	-0.146089	0.00340569	2	2	2	16	16	16	13.742	0	30.605	80178000	5	P62851	P62851
RPS26;RPS26P11	40S ribosomal protein S26;Putative 40S ribosomal protein S26-like 1	NaN	0.117371	-0.0597548	NaN	-0.212094	-0.0181398	3	3	3	36.5	36.5	36.5	13.015	0	18.592	48324000	5	P62854;Q5JNZ5	P62854;Q5JNZ5
RPS28	40S ribosomal protein S28	-0.0191732	0.337176	0.136255	-0.439897	0.407469	-0.343008	2	2	2	33.3	33.3	33.3	7.8409	0	323.31	287430000	10	P62857	P62857
GNB1;GNB2;GNB4	Guanine nucleotide-binding protein G(I)/G(S)/G(T) subunit beta-1;Guanine nucleotide-binding protein G(I)/G(S)/G(T) subunit beta-2;Guanine nucleotide-binding protein subunit beta-4	-0.325848	0.213463	0.178379	-0.150709	-0.0903407	-0.137157	1	1	1	2.9	2.9	2.9	37.377	0.0022624	6.1296	52154000	4	P62873;P62879;Q9HAV0	P62873;P62879;Q9HAV0
RPL30	60S ribosomal protein L30	0.351432	-0.174904	-0.145271	0.00169659	0.404987	0.00526786	3	3	3	34.8	34.8	34.8	12.784	0	21.219	55120000	5	P62888	P62888
RPL10A	60S ribosomal protein L10a	-0.0730932	0.280201	0.471849	-0.379166	0.252405	-0.405498	4	4	4	21.2	21.2	21.2	24.831	0	60.754	198640000	13	P62906	P62906
RPL11	60S ribosomal protein L11	0.0103199	0.0957117	NaN	0.256104	0.141634	NaN	1	1	1	7.9	7.9	7.9	20.252	0	6.7447	90075000	3	P62913	P62913
RPL8	60S ribosomal protein L8	-0.144066	-0.0774639	-0.0811579	0.0565509	-0.270541	0.0119069	3	3	3	10.9	10.9	10.9	28.024	0	18.159	47576000	6	P62917	P62917
PPIA	Peptidyl-prolyl cis-trans isomerase A;Peptidyl-prolyl cis-trans isomerase A, N-terminally processed	0.102101	0.125004	-0.0391361	0.0701303	0.0424793	-0.244866	7	7	7	64.2	64.2	64.2	18.012	0	50.705	737560000	20	P62937;Q9Y536;F5H284;P0DN37;P0DN26;A0A0B4J2A2;A0A075B767;A0A075B759	P62937
FKBP1A	Peptidyl-prolyl cis-trans isomerase FKBP1A	-0.0867197	0.0634016	NaN	0.211678	-0.205422	NaN	1	1	1	12	12	12	11.951	0	7.5686	45929000	2	P62942	P62942
RPS27A;UBC;UBB;UBA52	Ubiquitin-40S ribosomal protein S27a;Ubiquitin;40S ribosomal protein S27a;Polyubiquitin-C;Ubiquitin;Polyubiquitin-B;Ubiquitin;Ubiquitin-60S ribosomal protein L40;Ubiquitin;60S ribosomal protein L40	0.166933	-0.0656539	-0.209021	0.0163722	-0.193139	-0.176801	5	5	5	35.9	35.9	35.9	17.965	0	49.906	211180000	12	P62979;P0CG48;P0CG47;P62987;A0A2R8Y422	P62979;P0CG48;P0CG47;P62987;A0A2R8Y422
TRA2A;TRA2B	Transformer-2 protein homolog alpha;Transformer-2 protein homolog beta	-0.175101	-0.0156643	NaN	0.298708	-0.0543966	NaN	1	1	1	3.5	3.5	3.5	32.688	1	-2	80646000	2	Q13595;P62995	Q13595;P62995
RAC1	Ras-related C3 botulinum toxin substrate 1	-0.605398	NaN	0.714229	0.279658	NaN	0.0729132	2	2	2	14.6	14.6	14.6	21.45	0	11.634	6478400	2	P63000	P63000
YWHAZ	14-3-3 protein zeta/delta	-0.147366	0.0578096	-0.0281469	-0.314692	0.233706	-0.437365	9	9	5	38	38	26.9	27.745	0	121.68	1747900000	40	P63104	P63104
DYNLL1;DYNLL2	Dynein light chain 1, cytoplasmic;Dynein light chain 2, cytoplasmic	0.179527	-0.0260477	0.028639	0.434065	-0.12399	-0.180103	2	2	2	37.1	37.1	37.1	10.366	0	14.418	39967000	10	P63167;Q96FJ2	P63167;Q96FJ2
GNB2L1	Guanine nucleotide-binding protein subunit beta-2-like 1;Guanine nucleotide-binding protein subunit beta-2-like 1, N-terminally processed	NaN	-0.304642	-0.066285	NaN	-0.316024	-0.0623163	4	4	4	19.6	19.6	19.6	35.076	0	24.521	36966000	4	P63244	P63244
ACTG1	Actin, cytoplasmic 2;Actin, cytoplasmic 2, N-terminally processed	0.133093	0.133448	-0.198259	-0.153944	-0.0509169	-0.0984341	19	1	1	58.9	4.5	4.5	41.792	0	27.891	152970000	9	P63261	P63261
EEF1A1;EEF1A1P5	Elongation factor 1-alpha 1;Putative elongation factor 1-alpha-like 3	0.078617	0.0702565	0.0248449	0.0311644	0.0420623	0.0299141	16	16	16	46.3	46.3	46.3	50.14	0	323.31	3316000000	98	P68104;Q5VTE0;Q05639	P68104;Q5VTE0
TUBA1B;TUBA4A	Tubulin alpha-1B chain;Tubulin alpha-4A chain	0.0466117	0.108982	0.0290438	0.0521576	0.0816422	-0.0358895	12	12	1	36.1	36.1	2.9	50.151	0	323.31	1442300000	66	P68363;P68366	P68363;P68366
TUBB4B;TUBB4A	Tubulin beta-4B chain;Tubulin beta-4A chain	0.00799304	-0.107607	-0.0238429	0.101963	-0.0879852	-0.052569	13	1	1	38.9	3.8	3.8	49.83	0	7.2879	134970000	6	P68371;P04350	P68371;P04350
HIST1H3A;HIST2H3A;HIST3H3;HIST2H3PS2	Histone H3.1;Histone H3.2;Histone H3.1t;Histone H3	-0.231925	-0.320393	-0.248215	-0.158672	-0.34138	0.00609815	5	5	2	24.3	24.3	7.4	15.404	0	119.6	11225000000	25	P68431;Q71DI3;Q16695;Q5TEC6;Q6NXT2	P68431;Q71DI3;Q16695;Q5TEC6
CCT2	T-complex protein 1 subunit beta	-0.0185817	-0.413029	-0.665141	0.843867	-0.358998	0.185436	4	4	4	10.8	10.8	10.8	57.488	0	26.293	49811000	7	P78371	P78371
GSTO1	Glutathione S-transferase omega-1	0.396237	0.430599	0.872685	0.216872	0.478677	0.66035	2	2	2	10	10	10	27.566	0	12.793	61980000	6	P78417	P78417
RPL24	60S ribosomal protein L24	-0.0809575	-0.175458	-0.394164	-0.135138	-0.390146	-0.0675524	6	6	6	26.8	26.8	26.8	17.779	0	98.684	325850000	14	P83731	P83731
ERH	Enhancer of rudimentary homolog	0.248041	0.408498	1.15876	0.0469067	0.737942	0.247772	4	4	4	52.9	52.9	52.9	12.259	0	106.94	625820000	9	P84090	P84090
H3F3A	Histone H3.3	-0.113782	-0.180416	-0.28307	0.121333	-0.308514	0.212281	5	2	2	24.3	7.4	7.4	15.328	0	30.755	91350000	5	P84243	P84243
SLC25A3	Phosphate carrier protein, mitochondrial	1.82845	1.54565	1.41762	1.40317	1.69514	1.5442	8	8	8	16.6	16.6	16.6	40.094	0	286.51	1110100000	35	Q00325	Q00325
CLTC	Clathrin heavy chain 1	0.0835359	-0.0998843	0.278383	0.0725336	-0.0206375	0.145645	10	10	10	7.7	7.7	7.7	191.61	0	63.543	174450000	19	Q00610	Q00610
FKBP3	Peptidyl-prolyl cis-trans isomerase FKBP3	NaN	-0.113656	0.236581	NaN	0.0455673	0.433956	2	2	2	10.3	10.3	10.3	25.177	0	12.063	31698000	3	Q00688	Q00688
HNRNPU	Heterogeneous nuclear ribonucleoprotein U	0.101512	0.180885	0.0635078	-0.150559	0.098532	-0.165033	9	9	9	10.4	10.4	10.4	90.583	0	107.01	242170000	17	Q00839	Q00839
CAP1	Adenylyl cyclase-associated protein 1	0.229815	NaN	-0.517885	0.916812	NaN	-0.272409	2	2	2	7.6	7.6	7.6	51.901	0	13.014	14847000	4	Q01518	Q01518
PFKP	ATP-dependent 6-phosphofructokinase, platelet type	1.79815	1.06055	0.980415	1.21391	1.14346	1.12102	23	23	21	32.8	32.8	30.7	85.595	0	207.37	898340000	52	Q01813;P08237	Q01813
RPL18A	60S ribosomal protein L18a	0.000184357	0.0207314	-0.0383828	0.360706	0.0386331	0.0869372	4	4	4	19.3	19.3	19.3	20.762	0	27.523	254980000	15	Q02543	Q02543
FKBP4	Peptidyl-prolyl cis-trans isomerase FKBP4;Peptidyl-prolyl cis-trans isomerase FKBP4, N-terminally processed	0.0702532	0.160815	NaN	-0.259986	0.00805163	NaN	2	2	2	7	7	7	51.804	0	11.958	22358000	3	Q02790	Q02790
RPL6	60S ribosomal protein L6	0.120492	0.238796	-0.053259	0.213453	0.0899138	0.298711	4	4	4	12.8	12.8	12.8	32.728	0	211.09	64700000	10	Q02878	Q02878
EIF4G1	Eukaryotic translation initiation factor 4 gamma 1	0.0963556	0.249381	NaN	-0.634003	0.372779	NaN	1	1	1	1.2	1.2	1.2	175.49	0	6.5375	6795500	2	Q04637	Q04637
PRDX1	Peroxiredoxin-1	0.0972367	0.0291417	-0.399451	0.377579	-0.151342	0.561285	7	7	6	43.7	43.7	38.2	22.11	0	224.9	416610000	23	Q06830	Q06830
RPL18	60S ribosomal protein L18	NaN	-0.200487	-0.121939	NaN	-0.279458	0.355734	2	2	2	13.8	13.8	13.8	21.634	0	12.534	27942000	3	Q07020	Q07020
DHX9	ATP-dependent RNA helicase A	0.995398	-0.093402	-0.183204	0.305539	0.663272	0.106131	2	2	2	2	2	2	140.96	0	11.802	24041000	4	Q08211	Q08211
ACACA	Acetyl-CoA carboxylase 1;Biotin carboxylase	-0.392894	-0.3422	NaN	-0.604489	-0.212438	NaN	4	4	4	2.6	2.6	2.6	265.55	0	26.826	72419000	6	Q13085;O00763	Q13085
MTAP	S-methyl-5-thioadenosine phosphorylase	-0.0656095	NaN	0.0690757	0.275457	NaN	0.0967537	1	1	1	6	6	6	31.236	0.0043668	6.0626	6308600	2	Q13126	Q13126
HNRNPA0	Heterogeneous nuclear ribonucleoprotein A0	0.0665818	0.173419	0.463189	-0.197167	0.262516	0.0585911	5	5	5	19.3	19.3	19.3	30.84	0	77.592	473070000	17	Q13151	Q13151
CBX3	Chromobox protein homolog 3	-0.170688	NaN	0.219232	-0.231506	NaN	-0.434616	1	1	1	3.8	3.8	3.8	20.811	0.0044248	6.0942	189860000	3	Q13185	Q13185
TRIM28	Transcription intermediary factor 1-beta	0.16667	-0.00848496	NaN	-0.000948429	0.2889	NaN	4	4	4	7.7	7.7	7.7	88.549	0	48.448	45162000	7	Q13263	Q13263
G3BP1	Ras GTPase-activating protein-binding protein 1	NaN	0.221497	-0.535165	NaN	0.0622072	0.161469	3	3	3	10.9	10.9	10.9	52.164	0	21.126	33460000	5	Q13283	Q13283
EIF3I	Eukaryotic translation initiation factor 3 subunit I	-0.150688	-0.401121	0.477106	-0.0614375	0.077608	0.0452334	5	5	5	19.7	19.7	19.7	36.501	0	48.081	70393000	10	Q13347	Q13347
TCOF1	Treacle protein	NaN	-0.053498	-0.0208219	NaN	-0.0537629	0.254779	2	2	2	1.5	1.5	1.5	152.1	0	11.462	7591400	2	Q13428	Q13428
TUBB3	Tubulin beta-3 chain	0.328261	-0.268717	NaN	-0.207456	-0.228287	NaN	7	1	1	20	3.8	3.8	50.432	0	7.2887	19542000	4	Q13509	Q13509
DDX39B	Spliceosome RNA helicase DDX39B	-0.531674	-0.245852	-0.118955	-0.264901	-0.208555	0.200384	5	5	4	18	18	10.5	48.991	0	103.68	61052000	6	Q13838;O00148	Q13838
HNRNPD	Heterogeneous nuclear ribonucleoprotein D0	-0.0375761	0.107268	0.359624	0.142312	-0.0335153	-0.603597	3	2	2	11	8.7	8.7	38.434	0	12.967	57547000	5	Q14103	Q14103
GANAB	Neutral alpha-glucosidase AB	-0.289099	0.218549	-0.143215	-0.698709	-0.0473422	-0.49077	3	3	3	3.9	3.9	3.9	106.87	0	17.8	23661000	4	Q14697	Q14697
KPNB1	Importin subunit beta-1	-0.03085	-0.142984	0.312152	0.936721	0.0927705	-0.187058	5	5	5	6.8	6.8	6.8	97.169	0	30.01	92127000	8	Q14974	Q14974
EIF4H	Eukaryotic translation initiation factor 4H	0.139379	0.218989	NaN	0.327574	0.169417	NaN	3	3	3	11.7	11.7	11.7	27.385	0	17.067	42529000	4	Q15056	Q15056
PDIA6	Protein disulfide-isomerase A6	0.482565	0.414081	NaN	0.337371	0.40522	NaN	1	1	1	2.3	2.3	2.3	48.121	0	288.73	72444000	2	Q15084	Q15084
PTGES3	Prostaglandin E synthase 3	-0.150778	0.0287366	0.462086	-0.18734	0.155302	-0.32761	4	4	4	24.4	24.4	24.4	18.697	0	24.429	128130000	7	Q15185	Q15185
NONO	Non-POU domain-containing octamer-binding protein	0.105652	0.398812	0.062243	0.147288	-0.116414	0.102754	3	3	3	8.3	8.3	8.3	54.231	0	19.417	85230000	10	Q15233	Q15233
PCBP1	Poly(rC)-binding protein 1	0.0612655	-0.501891	NaN	0.10705	-0.0312998	NaN	2	1	1	9.3	3.7	3.7	37.497	0	6.4238	6997400	2	Q15365	Q15365
PCBP2;PCBP3	Poly(rC)-binding protein 2;Poly(rC)-binding protein 3	0.0245873	NaN	-0.206415	-0.811154	NaN	0.0933216	4	4	3	17.3	17.3	11.8	38.58	0	70.556	52554000	8	Q15366;P57721	Q15366;P57721
MAPRE1	Microtubule-associated protein RP/EB family member 1	0.115182	-0.117962	0.157028	-0.421238	-0.0422708	-0.443551	3	3	3	20.1	20.1	20.1	29.999	0	21.309	47085000	7	Q15691	Q15691
UBE2V2	Ubiquitin-conjugating enzyme E2 variant 2	-0.170329	0.175073	NaN	-0.392369	0.046386	NaN	2	2	1	10.3	10.3	4.8	16.363	0	11.641	65157000	4	Q15819	Q15819
ZYX	Zyxin	-0.428611	0.00794142	-0.00225002	0.517719	0.337382	-0.153007	1	1	1	2.6	2.6	2.6	61.277	0	6.7245	11707000	4	Q15942	Q15942
ADRM1	Proteasomal ubiquitin receptor ADRM1	NaN	-0.475851	-0.310166	NaN	-0.618629	-0.305249	2	2	2	6.1	6.1	6.1	42.153	0	11.827	10730000	3	Q16186	Q16186
CSRP2	Cysteine and glycine-rich protein 2	0.561069	0.353043	NaN	0.38067	0.463753	NaN	1	1	1	10.9	10.9	10.9	20.954	0	7.0804	9081700	2	Q16527	Q16527
AARS2	Alanine--tRNA ligase, mitochondrial	NaN	0.253854	0.433102	NaN	-0.21706	-0.0714628	1	1	1	0.9	0.9	0.9	107.34	0.0044346	6.0953	6196100	2	Q5JTZ9	Q5JTZ9
KPRP	Keratinocyte proline-rich protein	-0.153236	-0.0629414	0.313857	1.29736	-0.433718	0.169261	4	4	4	8.1	8.1	8.1	64.135	0	95.135	448290000	9	Q5T749	Q5T749
XP32	Skin-specific protein 32	-0.100845	-0.0027895	-0.181677	2.21254	-0.823347	0.62338	3	3	3	12	12	12	26.238	0	17.96	35675000	5	Q5T750	Q5T750
RALGAPA1	Ral GTPase-activating protein subunit alpha-1	0.365276	0.354048	0.511487	-0.0439706	-0.106464	0.33776	1	1	1	0.3	0.3	0.3	229.83	0	14.268	448770000	5	Q6GYQ0	Q6GYQ0
NCEH1	Neutral cholesterol ester hydrolase 1	0.900337	1.8348	NaN	0.833591	1.89458	NaN	2	2	2	7.1	7.1	7.1	45.807	0	13.502	26312000	6	Q6PIU2	Q6PIU2
TUBA1C;TUBA1A;TUBA3E;TUBA8	Tubulin alpha-1C chain;Tubulin alpha-1A chain;Tubulin alpha-3E chain;Tubulin alpha-8 chain	0.0638116	0.1813	NaN	0.501238	0.0738648	NaN	12	1	1	36.3	2.9	2.9	49.895	0	6.2094	20614000	3	Q9BQE3;Q71U36;P0DPH8;P0DPH7;Q6PEY2;Q9NY65;A6NHL2	Q9BQE3;Q71U36;P0DPH8;P0DPH7;Q6PEY2;Q9NY65
PLD3	Phospholipase D3	1.44561	1.20228	1.30692	1.02522	1.71588	1.40093	4	4	4	11.4	11.4	11.4	54.705	0	208.32	413810000	23	Q8IV08	Q8IV08
SRRM1	Serine/arginine repetitive matrix protein 1	0.1405	-0.0854542	-0.122839	-0.0402112	-0.423285	-0.037694	1	1	1	1.1	1.1	1.1	102.33	0.006383	6.0078	18669000	3	Q8IYB3	Q8IYB3
HIST3H2BB	Histone H2B type 3-B	-0.0499875	-0.601981	-0.438749	0.201048	-0.53207	0.562517	9	3	1	55.6	13.5	5.6	13.908	0	20.482	215430000	9	Q8N257;A0A2R8Y619	Q8N257
ZNF645	E3 ubiquitin-protein ligase ZNF645	NaN	-0.44873	-0.572581	NaN	-0.515179	-0.141165	1	1	1	4.2	4.2	4.2	48.784	0.0065076	6.0467	84987000	2	Q8N7E2	Q8N7E2
SERBP1	Plasminogen activator inhibitor 1 RNA-binding protein	-0.137407	-0.24931	-0.315918	-0.118427	-0.213931	-0.10123	6	6	6	14.7	14.7	14.7	44.965	0	54.457	281120000	18	Q8NC51	Q8NC51
LPCAT1	Lysophosphatidylcholine acyltransferase 1	-0.395343	-0.173974	NaN	-0.28726	0.0393192	NaN	1	1	1	2.4	2.4	2.4	59.151	0	7.9967	8555700	2	Q8NF37	Q8NF37
H1FX	Histone H1x	0.271834	0.107378	-0.356025	0.37505	-0.112462	0.0462205	4	4	3	21.1	21.1	12.7	22.487	0	23.724	89713000	8	Q92522	Q92522
UFD1L	Ubiquitin fusion degradation protein 1 homolog	-0.19059	0.263697	0.233631	-0.0716064	0.0940548	-0.275533	1	1	1	3.3	3.3	3.3	34.5	0	6.3609	29454000	3	Q92890	Q92890
KHSRP	Far upstream element-binding protein 2	0.0154577	-0.0764034	-0.0125446	-0.0752975	-0.139563	0.13109	6	6	5	11.8	11.8	10.5	73.114	0	46.953	105100000	15	Q92945;Q96I24	Q92945
LRRC59	Leucine-rich repeat-containing protein 59	-0.0418615	-0.0276647	-0.0361705	-0.216629	-0.119983	-0.05795	6	6	6	23.1	23.1	23.1	34.93	0	36.846	185680000	12	Q96AG4	Q96AG4
HMCN1	Hemicentin-1	-0.345103	-0.687044	-0.516161	-0.195355	-0.491378	-0.183039	2	2	2	0.6	0.6	0.6	613.38	0	11.686	101360000000	24	Q96RW7	Q96RW7
PARK7	Protein deglycase DJ-1	-0.431755	-0.220164	0.0941234	-0.413694	-0.223334	-0.45532	6	6	6	40.7	40.7	40.7	19.891	0	44.513	124040000	12	Q99497	Q99497
CCT7	T-complex protein 1 subunit eta	-0.174285	0.0413524	NaN	-0.167751	-0.319318	NaN	4	4	4	10.1	10.1	10.1	59.366	0	25.995	35088000	6	Q99832	Q99832
PRMT1	Protein arginine N-methyltransferase 1	-0.206008	-0.181131	NaN	-0.159446	0.291435	NaN	4	4	4	14.3	14.3	14.3	42.461	0	25.445	55393000	5	Q99873	Q99873
HIST1H2BL;HIST1H2BA	Histone H2B type 1-L;Histone H2B type 1-A	-0.153339	-0.577865	-0.540078	0.309964	-0.552717	0.538132	9	9	0	55.6	55.6	0	13.952	0	212.84	9110700000	57	Q99880;Q96A08	Q99880;Q96A08
PAIP2	Polyadenylate-binding protein-interacting protein 2	-0.182372	NaN	1.0413	-0.843423	NaN	-1.63495	1	1	1	6.3	6.3	6.3	14.984	0.0064103	6.0128	145800000	4	Q9BPZ3	Q9BPZ3
ELAC2	Zinc phosphodiesterase ELAC protein 2	0.0740635	-0.20894	-0.15974	-0.0408816	-0.0303335	-0.0740612	1	1	1	1.1	1.1	1.1	92.218	0	7.3301	39765000	3	Q9BQ52	Q9BQ52
C19orf43	Uncharacterized protein C19orf43	-0.348754	-0.112517	NaN	-0.464883	-0.559542	NaN	3	3	3	30.1	30.1	30.1	18.419	0	225.82	82475000	4	Q9BQ61	Q9BQ61
ACAT2	Acetyl-CoA acetyltransferase, cytosolic	-0.147002	-0.451315	0.172408	-0.303985	-0.254157	0.289786	4	4	3	18.1	18.1	14.4	41.35	0	26.206	16702000	4	Q9BWD1	Q9BWD1
RBM4	RNA-binding protein 4	0.120581	NaN	-0.426066	-0.0158279	NaN	-0.0567589	2	2	2	6	6	6	40.313	0	11.174	8631800	2	Q9BWF3	Q9BWF3
HINT2	Histidine triad nucleotide-binding protein 2, mitochondrial	0.170385	0.00537139	0.336465	0.804119	0.873462	-0.00616014	1	1	1	9.2	9.2	9.2	17.162	0	6.5828	16166000	3	Q9BX68	Q9BX68
RAB1B;RAB1C	Ras-related protein Rab-1B;Putative Ras-related protein Rab-1C	0.0235018	0.382246	0.157977	-0.15714	0.402889	-0.503383	3	3	3	14.9	14.9	14.9	22.171	0	18.402	35966000	9	Q9H0U4;Q92928;P62820;Q92930;P61006;P61026;P51153;P59190	Q9H0U4;Q92928
BCL11A	B-cell lymphoma/leukemia 11A	-0.338215	-0.70048	-0.497466	-0.189863	-0.468497	-0.149575	1	1	1	1.9	1.9	1.9	91.196	0	8.5196	12131000000	238	Q9H165	Q9H165
SH3BGRL3	SH3 domain-binding glutamic acid-rich-like protein 3	NaN	0.00985694	-0.122496	NaN	-0.00412273	-0.577277	1	1	1	7.5	7.5	7.5	10.438	0	14.268	58492000	2	Q9H299	Q9H299
BOLA2	BolA-like protein 2	-0.363451	0.219474	0.615581	0.0468401	0.131246	0.178995	1	1	1	10.5	10.5	10.5	10.116	0.0043956	6.0811	41644000	3	Q9H3K6	Q9H3K6
RNPEP	Aminopeptidase B	-0.284645	NaN	0.29442	-0.00694156	NaN	-0.0127292	2	2	2	3.8	3.8	3.8	72.595	0	13.145	11587000	3	Q9H4A4	Q9H4A4
RTN4	Reticulon-4	-0.113568	NaN	0.177194	0.414632	NaN	0.257108	3	3	3	2.5	2.5	2.5	129.93	0	18.06	17598000	3	Q9NQC3	Q9NQC3
AASDHPPT	L-aminoadipate-semialdehyde dehydrogenase-phosphopantetheinyl transferase	-0.265344	-0.159606	NaN	-0.189947	-0.491348	NaN	1	1	1	4.9	4.9	4.9	35.776	0	7.1634	14676000	2	Q9NRN7	Q9NRN7
PHPT1	14 kDa phosphohistidine phosphatase	NaN	-0.173446	0.282866	NaN	0.13743	0.164935	1	1	1	7.2	7.2	7.2	13.832	0	12.21	84718000	3	Q9NRX4	Q9NRX4
RCC2	Protein RCC2	-0.110534	-0.132859	-0.116957	-0.142784	-0.0590124	0.104827	4	4	4	5.7	5.7	5.7	56.084	0	23.222	40069000	6	Q9P258	Q9P258
ZNF624	Zinc finger protein 624	-0.422859	-0.412908	NaN	-0.104003	-0.346961	NaN	1	1	1	1.6	1.6	1.6	99.928	0.0063966	6.0081	258970000	2	Q9P2J8	Q9P2J8
EIF3K	Eukaryotic translation initiation factor 3 subunit K	-0.220798	0.0110437	0.420871	0.309315	0.17417	0.284719	3	3	3	16.1	16.1	16.1	25.059	0	18.523	72217000	6	Q9UBQ5	Q9UBQ5
ZBTB47	Zinc finger and BTB domain-containing protein 47	-0.263528	-0.585366	NaN	-0.258795	-0.377603	NaN	1	1	1	2	2	2	82.759	1	-2	150180000	2	Q9UFB7	Q9UFB7
CYB5R1	NADH-cytochrome b5 reductase 1	-0.196183	-0.396702	NaN	0.315349	0.377401	NaN	1	1	1	3.3	3.3	3.3	34.094	0	6.4541	5623400	2	Q9UHQ9	Q9UHQ9
PFDN2	Prefoldin subunit 2	0.101712	NaN	0.653407	-0.251189	NaN	-0.325641	3	3	3	20.1	20.1	20.1	16.648	0	20.345	41017000	3	Q9UHV9	Q9UHV9
ZNF215	Zinc finger protein 215	-0.300698	-0.511579	-0.40802	-0.10308	-0.411465	0.16592	1	1	1	2.9	2.9	2.9	60.034	0	18.442	87656000000	24	Q9UL58	Q9UL58
PA2G4	Proliferation-associated protein 2G4	0.0438208	0.142302	0.36651	-0.0449126	0.141425	-0.399717	3	3	3	10.4	10.4	10.4	43.786	0	18.951	62409000	5	Q9UQ80	Q9UQ80
NIP7	60S ribosome subunit biogenesis protein NIP7 homolog	NaN	-0.0676012	-0.156326	NaN	-0.0510862	-0.380885	1	1	1	5.6	5.6	5.6	20.462	0	6.252	14065000	2	Q9Y221	Q9Y221
PIN4	Peptidyl-prolyl cis-trans isomerase NIMA-interacting 4	-0.111863	-0.3983	-0.113356	0.198526	-0.191758	0.801478	2	2	2	13.7	13.7	13.7	13.81	0	34.868	153960000	5	Q9Y237	Q9Y237
NUDC	Nuclear migration protein nudC	NaN	-0.4196	0.0781758	NaN	0.179638	0.122694	1	1	1	4.5	4.5	4.5	38.242	0	6.5174	17256000	2	Q9Y266	Q9Y266
LSM4	U6 snRNA-associated Sm-like protein LSm4	NaN	-0.134956	-0.350117	NaN	-0.21175	0.109498	1	1	1	8.6	8.6	8.6	15.35	1	-2	18913000	2	Q9Y4Z0	Q9Y4Z0
PPME1	Protein phosphatase methylesterase 1	1.91832	1.74929	1.02314	1.43281	2.01288	0.985482	3	3	3	14.2	14.2	14.2	42.315	0	19.516	99914000	10	Q9Y570	Q9Y570
PSAT1	Phosphoserine aminotransferase	NaN	-0.411993	0.446664	NaN	0.0141659	0.102006	2	2	2	5.7	5.7	5.7	40.422	0	11.796	11088000	3	Q9Y617	Q9Y617
CLIC4	Chloride intracellular channel protein 4	0.193835	NaN	-0.0625938	-0.0318632	NaN	0.250198	1	1	1	4.7	4.7	4.7	28.772	0	6.3008	31503000	2	Q9Y696	Q9Y696

## Sheet: Fig. 4G data
Identified proteins (in at least 2 of 3 biological replicates) in volcano plot Fig. 4G (6Yn-Pro+H2O2+NRH+Olaparib vs DMSO+H2O2+NRH+Olaparib)
Gene names	Protein names	DMSO+N+H+O 1 (Log2 intensity)	DMSO+N+H+O 2 (Log2 intensity)	DMSO+N+H+O 3 (Log2 intensity)	6Yn-Pro+N+H+O 1 (Log2 intensity)	6Yn-Pro+N+H+O 2 (Log2 intensity)	6Yn-Pro+N+H+O 3 (Log2 intensity)	Peptides	Razor + unique peptides	Unique peptides	Sequence coverage [%]	Unique + razor sequence coverage [%]	Unique sequence coverage [%]	Mol. weight [kDa]	Q-value	Score	Intensity	MS/MS count	Protein IDs	Majority protein IDs
SIK1;LOC102724428	Serine/threonine-protein kinase SIK1	0.167703	0.0345423	1.07422	-0.214463	-0.42115	0.0690171	1	1	1	2.8	2.8	2.8	84.901	0.0065359	6.0543	1676700000	6	P57059;A0A0B4J2F2	P57059;A0A0B4J2F2
RAP1B;RAP1A	Ras-related protein Rap-1b;Ras-related protein Rap-1A;Ras-related protein Rap-1b-like protein	0.352512	1.33657	NaN	-0.697039	0.374188	NaN	2	2	2	12	12	12	20.825	0	15.677	106210000	3	P61224;P62834;A6NIZ1	P61224;P62834;A6NIZ1
SNRPG;SNRPGP15	Small nuclear ribonucleoprotein G;Putative small nuclear ribonucleoprotein G-like protein 15	0.471207	1.32339	-0.838229	-0.652164	0.944757	-0.391632	2	2	2	19.7	19.7	19.7	8.496	0	12.459	216200000	7	P62308;A8MWD9	P62308;A8MWD9
HMGB1;HMGB1P1	High mobility group protein B1;Putative high mobility group protein B1-like 1	-0.449617	-0.479862	-0.303495	0.241177	-0.0551513	0.421247	1	1	1	7.4	7.4	7.4	24.893	0	6.5375	24756000	3	P09429;B2RPK0	P09429;B2RPK0
CLIC1	Chloride intracellular channel protein 1	-0.0344403	-0.485333	-0.826925	-0.163704	0.00783849	0.00691986	5	5	5	39.8	39.8	39.8	26.922	0	48.327	61957000	11	O00299	O00299
DDX3X;DDX3Y	ATP-dependent RNA helicase DDX3X;ATP-dependent RNA helicase DDX3Y	0.199223	0.0626687	0.321698	0.182952	0.0421355	-0.221286	4	4	4	8.2	8.2	8.2	73.243	0	23.494	62585000	7	O00571;O15523	O00571;O15523
MAN2B1	Lysosomal alpha-mannosidase;Lysosomal alpha-mannosidase A peptide;Lysosomal alpha-mannosidase B peptide;Lysosomal alpha-mannosidase C peptide;Lysosomal alpha-mannosidase D peptide;Lysosomal alpha-mannosidase E peptide	-0.616317	-0.64482	-1.15563	-0.55759	-0.00555134	0.0105107	1	1	1	1.6	1.6	1.6	113.74	0	6.6873	23536000	5	O00754	O00754
TPP1	Tripeptidyl-peptidase 1	-0.376473	NaN	-0.773373	0.714407	NaN	1.76847	2	2	2	3.7	3.7	3.7	61.247	0	12.324	22035000	2	O14773	O14773
PSMA7	Proteasome subunit alpha type-7	-0.3583	-0.176478	-0.194475	0.0957128	-0.167934	-0.0333534	3	3	3	13.7	13.7	13.7	27.887	0	21.471	67209000	9	O14818;Q8TAA3	O14818
HNRNPDL	Heterogeneous nuclear ribonucleoprotein D-like	0.172887	0.3989	0.0818563	-0.383852	-0.0632591	-0.334182	3	3	2	5.2	5.2	3.3	46.437	0	190.87	134670000	7	O14979;Q9ULL8;REV__Q8N0S2;REV__Q9ULL8	O14979
EIF3H	Eukaryotic translation initiation factor 3 subunit H	0.0834924	0.163898	NaN	-0.136087	0.0605111	NaN	1	1	1	5.4	5.4	5.4	39.93	0	32.219	26966000	4	O15372	O15372
STX7	Syntaxin-7	0.673852	0.298927	NaN	-0.238879	0.460327	NaN	1	1	1	5.4	5.4	5.4	29.815	0	7.0285	57242000	3	O15400	O15400
ACTN4	Alpha-actinin-4	0.150182	-0.374808	0.129252	0.21921	0.0734874	-0.150027	4	4	4	6	6	6	104.85	0	24.467	32987000	6	O43707;P12814;P35609;Q08043	O43707
SNX3	Sorting nexin-3	-0.00358212	0.153115	-0.352533	0.119691	-0.160653	0.264123	3	3	3	21.6	21.6	21.6	18.762	0	18.306	119320000	8	O60493	O60493
HIST1H2BH;HIST1H2BN;HIST1H2BC;HIST1H2BD;HIST1H2BK;HIST2H2BF;HIST1H2BM;H2BFS	Histone H2B type 1-H;Histone H2B type 1-N;Histone H2B type 1-C/E/F/G/I;Histone H2B type 1-D;Histone H2B type 1-K;Histone H2B type 2-F;Histone H2B type 1-M;Histone H2B type F-S	-0.123005	-0.965677	0.573014	0.237375	-0.581528	0.460277	9	1	0	55.6	5.6	0	13.892	0	6.9355	1443300000	4	Q93079;Q99877;P62807;P58876;O60814;Q5QNW6;Q99879;P57053	Q93079;Q99877;P62807;P58876;O60814;Q5QNW6;Q99879;P57053
H2AFY	Core histone macro-H2A.1	0.0557404	0.248458	0.61747	-0.156768	0.086798	-0.206231	3	3	3	13.2	13.2	13.2	39.617	0	23.269	73799000	9	O75367	O75367
SEC22B	Vesicle-trafficking protein SEC22b	0.0860765	NaN	-0.566395	-0.0779029	NaN	-0.379444	1	1	1	4.2	4.2	4.2	24.593	0	6.159	28386000	2	O75396	O75396
ATP5H	ATP synthase subunit d, mitochondrial	0.277674	-0.090844	NaN	-0.307467	-0.212781	NaN	2	2	2	20.5	20.5	20.5	18.491	0	12.884	21497000	10	O75947	O75947
RSL1D1	Ribosomal L1 domain-containing protein 1	NaN	-0.197448	0.2668	NaN	-0.0480274	0.256514	2	2	2	3.7	3.7	3.7	54.972	0	11.881	20105000	2	O76021	O76021
NDUFB8	NADH dehydrogenase [ubiquinone] 1 beta subcomplex subunit 8, mitochondrial	0.0812304	0.757775	-1.52891	0.308854	1.18384	-0.399835	1	1	1	5.4	5.4	5.4	21.766	0	6.1727	37758000	3	O95169	O95169
NDUFA7	NADH dehydrogenase [ubiquinone] 1 alpha subcomplex subunit 7	0.186483	0.0124967	0.0238128	0.102816	-0.420599	-0.0582182	2	2	2	29.2	29.2	29.2	12.551	0	13.422	25886000	5	O95182	O95182
LDHA	L-lactate dehydrogenase A chain	-0.0364563	0.0435502	-0.160794	0.093335	0.100455	0.00891185	8	8	7	25.9	25.9	22.3	36.688	0	323.31	427690000	22	P00338;P07864;Q6ZMR3	P00338
GOT2	Aspartate aminotransferase, mitochondrial	-0.371684	-0.0238659	0.12999	-0.328777	-0.246003	-0.0527009	3	3	3	9.1	9.1	9.1	47.517	0	19.354	135180000	6	P00505	P00505
PGK1	Phosphoglycerate kinase 1	0.138885	0.478952	0.274236	-0.301244	-0.03333	-0.376339	6	6	6	20.4	20.4	20.4	44.614	0	238.28	212730000	16	P00558	P00558
ALDOA	Fructose-bisphosphate aldolase A	-0.110794	-0.0622624	-0.412287	0.0676696	0.106	-0.0707954	12	12	12	36	36	36	39.42	0	159.46	558500000	32	P04075;P09972;P05062	P04075
GAPDH	Glyceraldehyde-3-phosphate dehydrogenase	-0.080943	0.329886	0.330176	-0.186807	-0.292182	-0.224553	22	22	22	67.8	67.8	67.8	36.053	0	323.31	6625400000	132	P04406	P04406
ATP1A1	Sodium/potassium-transporting ATPase subunit alpha-1	-0.341748	NaN	-0.311172	0.0901662	NaN	0.0658158	1	1	1	0.8	0.8	0.8	112.89	0.0065217	6.0494	17145000	2	P05023	P05023
SLC25A5	ADP/ATP translocase 2;ADP/ATP translocase 2, N-terminally processed	-0.276677	-0.282066	-0.310986	0.164696	0.192445	0.183661	7	7	2	22.1	22.1	7.7	32.852	0	51.712	179120000	13	P05141;P12235;Q9H0C2	P05141
PCCA	Propionyl-CoA carboxylase alpha chain, mitochondrial	0.504474	-0.281385	NaN	-0.422535	0.0582844	NaN	2	2	2	2.5	2.5	2.5	80.058	0	12.264	44549000	4	P05165	P05165
HMGN2	Non-histone chromosomal protein HMG-17	0.0455724	-0.671826	0.159868	0.328785	-0.15238	-0.293049	2	2	2	25.6	25.6	25.6	9.3926	0	13.495	88281000	7	P05204	P05204
RPLP1	60S acidic ribosomal protein P1	-0.46912	0.161365	NaN	0.264549	0.534884	NaN	1	1	1	14	14	14	11.514	0	6.3657	7006600	4	P05386	P05386
SSB	Lupus La protein	0.0102677	0.54728	-0.278905	-0.092419	0.0775007	-0.0914221	4	4	4	9.3	9.3	9.3	46.836	0	27.887	95922000	5	P05455	P05455
ATP5G1;ATP5G3;ATP5G2	ATP synthase F(0) complex subunit C1, mitochondrial;ATP synthase F(0) complex subunit C3, mitochondrial;ATP synthase F(0) complex subunit C2, mitochondrial	0.347707	0.993378	-1.70634	-0.225793	0.497425	-0.518162	1	1	1	5.1	5.1	5.1	14.277	0	75.717	285650000	6	P05496;P48201;Q06055	P05496;P48201;Q06055
ENO1	Alpha-enolase	-0.0638361	-0.186644	0.0562102	0.208623	0.0332123	0.188697	16	16	16	49.1	49.1	49.1	47.168	0	261.56	805060000	40	P06733;P13929;P09104	P06733
GPI	Glucose-6-phosphate isomerase	0.320689	-0.0658783	0.501281	-0.21448	-0.291735	-0.157746	9	9	9	22.9	22.9	22.9	63.146	0	103.99	753930000	27	P06744;CON__Q3ZBD7	P06744
NPM1	Nucleophosmin	-0.0769274	0.388789	-0.848687	-0.174832	0.356719	-0.163207	8	8	8	23.5	23.5	23.5	32.575	0	92.732	826380000	18	P06748	P06748
LDHB	L-lactate dehydrogenase B chain	-0.105592	-0.0205885	0.30398	-0.0522105	-0.078932	0.221912	7	6	6	26.6	23.1	23.1	36.638	0	251.51	781630000	28	P07195	P07195
P4HB	Protein disulfide-isomerase	-0.959917	-0.181099	0.158049	0.522894	0.197857	-0.180315	2	2	2	3.9	3.9	3.9	57.116	0	11.931	19960000	4	P07237	P07237
H1F0	Histone H1.0;Histone H1.0, N-terminally processed	0.0575891	-0.0481115	0.407999	0.18766	-0.287574	0.391219	4	4	4	20.6	20.6	20.6	20.863	0	54.89	277730000	13	P07305	P07305
CTSD	Cathepsin D;Cathepsin D light chain;Cathepsin D heavy chain	-0.166314	-1.29082	0.709177	0.139339	0.766595	0.319159	2	2	2	8.5	8.5	8.5	44.552	0	12.784	79410000	6	P07339	P07339
TUBB;TUBB2B;TUBB2A	Tubulin beta chain;Tubulin beta-2B chain;Tubulin beta-2A chain	-0.116546	-0.125546	0.127298	-0.0385035	-0.100613	-0.0989763	15	15	2	45.7	45.7	7.2	49.67	0	191.34	1198500000	60	P07437;Q9BVA1;Q13885;Q3ZCM7;A6NNZ2;Q9BUF5;Q9H4B7;CON__ENSEMBL:ENSBTAP00000025008	P07437;Q9BVA1;Q13885
HEXB	Beta-hexosaminidase subunit beta;Beta-hexosaminidase subunit beta chain B;Beta-hexosaminidase subunit beta chain A	-1.07321	-0.759718	-1.0956	1.13416	1.24418	1.39463	5	5	5	10.6	10.6	10.6	63.111	0	41.281	109600000	9	P07686	P07686
PFN1	Profilin-1	0.218003	0.778551	-0.64867	-0.167629	0.222636	-0.314666	14	14	14	67.1	67.1	67.1	15.054	0	323.31	3305200000	96	P07737;CON__P02584	P07737
APRT	Adenine phosphoribosyltransferase	0.25951	0.645119	0.35561	-0.262015	-0.064588	-0.573052	1	1	1	7.2	7.2	7.2	19.608	0	6.3441	16950000	3	P07741	P07741
CTSB	Cathepsin B;Cathepsin B light chain;Cathepsin B heavy chain	NaN	-1.04888	-0.371738	NaN	1.75427	0.859551	2	2	2	9.4	9.4	9.4	37.821	0	12.164	29375000	3	P07858	P07858
HSP90AA1	Heat shock protein HSP 90-alpha	-0.235446	-0.288201	-0.101309	-0.0251356	0.207242	0.0462103	10	7	7	14.8	9.8	9.8	84.659	0	73.494	185870000	24	P07900;Q58FG0;Q58FG1	P07900
HNRNPC;HNRNPCL1;HNRNPCL3;HNRNPCL2;HNRNPCL4	Heterogeneous nuclear ribonucleoproteins C1/C2;Heterogeneous nuclear ribonucleoprotein C-like 1;Heterogeneous nuclear ribonucleoprotein C-like 3;Heterogeneous nuclear ribonucleoprotein C-like 2;Heterogeneous nuclear ribonucleoprotein C-like 4	-0.344905	-0.242215	0.175465	0.0857754	0.0440068	0.240299	9	9	7	25.5	25.5	21.9	33.67	0	323.31	444960000	14	P07910;O60812;B7ZW38;B2RXH8;P0DMR1;A0A0G2JPF8;A0A0G2JNQ3	P07910;O60812;B7ZW38;B2RXH8;P0DMR1;A0A0G2JPF8;A0A0G2JNQ3
HSP90AB1	Heat shock protein HSP 90-beta	-0.225282	-0.287929	0.0980439	-0.0259689	0.115932	0.0333154	11	11	8	15.6	15.6	10.6	83.263	0	254.52	1061100000	42	P08238;Q58FF8;Q58FF7;Q14568	P08238
VIM	Vimentin	-0.0676222	-0.139665	0.774027	-0.164819	-0.207108	0.0654377	22	21	19	45.9	44.4	40.6	53.651	0	323.31	1776100000	70	P08670;P17661;P41219;O43790;P14136;Q14533;P07196;P78386;Q16352;P07197;P78385;CON__P78386;CON__Q14533;CON__H-INV:HIT000292931;CON__P78385;CON__O43790;CON__Q61726;CON__Q6NT21	P08670
RPS17	40S ribosomal protein S17	-0.0720403	0.0988689	0.414401	-0.0461041	-0.545212	0.00446153	3	3	3	31.1	31.1	31.1	15.55	0	23.095	80111000	8	P08708	P08708
ANXA5	Annexin A5	0.0260425	0.0193827	NaN	-0.0743402	0.0383258	NaN	2	2	2	10	10	10	35.936	0	11.733	38665000	3	P08758	P08758
GSTP1	Glutathione S-transferase P	NaN	0.794842	-0.450945	NaN	-0.490059	-0.342586	2	2	2	12.4	12.4	12.4	23.356	0	11.949	19048000	3	P09211	P09211
HNRNPA1;HNRNPA1L2	Heterogeneous nuclear ribonucleoprotein A1;Heterogeneous nuclear ribonucleoprotein A1, N-terminally processed;Heterogeneous nuclear ribonucleoprotein A1-like 2	-0.373749	-0.223615	-0.234939	0.038627	0.0549208	0.131743	7	7	7	22.6	22.6	22.6	38.746	0	199.21	443870000	25	P09651;Q32P51;A0A2R8Y4L2	P09651;Q32P51
PARP1	Poly [ADP-ribose] polymerase 1	-0.140024	-0.24865	NaN	0.18148	0.00308049	NaN	7	7	7	6.4	6.4	6.4	113.08	0	73.588	96426000	11	P09874	P09874
UCHL1	Ubiquitin carboxyl-terminal hydrolase isozyme L1	-0.265497	-0.287579	NaN	0.313113	0.0519346	NaN	2	2	2	8.5	8.5	8.5	24.824	0	12.089	21517000	2	P09936	P09936
HIST2H2AA3;HIST1H2AG;HIST1H2AJ;H2AFJ;HIST2H2AC;HIST1H2AH;HIST1H2AC;HIST1H2AA;H2AFX;HIST2H2AB	Histone H2A type 2-A;Histone H2A type 1;Histone H2A type 1-J;Histone H2A.J;Histone H2A type 2-C;Histone H2A type 1-H;Histone H2A type 1-C;Histone H2A type 1-A;Histone H2AX;Histone H2A type 2-B	-0.103081	-0.235157	0.115535	0.742801	-0.286265	0.121558	6	6	1	40.8	40.8	5.4	14.095	0	84.162	2123800000	22	Q6FI13;P0C0S8;Q99878;Q9BTM1;Q16777;Q96KK5;Q93077;Q96QV6;P16104;Q8IUE6;REV__Q8NB25	Q6FI13;P0C0S8;Q99878;Q9BTM1;Q16777;Q96KK5;Q93077;Q96QV6;P16104;Q8IUE6
UQCRFS1;UQCRFS1P1	Cytochrome b-c1 complex subunit Rieske, mitochondrial;Cytochrome b-c1 complex subunit 11;Putative cytochrome b-c1 complex subunit Rieske-like protein 1	-0.0685686	NaN	0.975633	0.0152919	NaN	-0.0432795	2	2	2	12.8	12.8	12.8	29.668	0	13.837	45805000	2	P47985;P0C7P4	P47985;P0C7P4
HSPA1A;HSPA1B	Heat shock 70 kDa protein 1A;Heat shock 70 kDa protein 1B	-0.259398	-0.257319	0.198562	-0.0336957	-0.10222	0.0825922	16	16	11	36.7	36.7	27	70.051	0	323.31	916740000	39	P0DMV8;P0DMV9;P34931	P0DMV8;P0DMV9
HIST1H1E	Histone H1.4	0.128273	-0.320072	0.56875	0.210982	-0.323726	0.320159	26	26	10	66.7	66.7	29.7	21.865	0	323.31	53440000000	224	P10412;Q02539;P16401;P22492	P10412
TXN	Thioredoxin	-0.699642	1.10378	-0.408615	0.942887	-0.32083	-0.347988	3	3	3	21.9	21.9	21.9	11.737	0	17.201	146700000	5	P10599	P10599
CTSA	Lysosomal protective protein;Lysosomal protective protein 32 kDa chain;Lysosomal protective protein 20 kDa chain	-1.63085	-2.47321	-0.941178	1.55698	1.61327	1.94345	6	6	6	18.3	18.3	18.3	54.465	0	116.52	425140000	17	P10619	P10619
ESD	S-formylglutathione hydrolase	-0.18617	0.123558	NaN	0.0432707	0.101724	NaN	3	3	3	18.8	18.8	18.8	31.462	0	20.168	16442000	3	P10768	P10768
HSPD1	60 kDa heat shock protein, mitochondrial	0.108323	0.289039	-0.0401232	-0.63303	-0.189978	0	9	9	9	20.1	20.1	20.1	61.054	0	129.67	196400000	18	P10809	P10809
HSPA5	78 kDa glucose-regulated protein	-0.711862	-0.497408	-0.528696	0.708127	0.695523	0.786819	9	9	9	20.3	20.3	20.3	72.332	0	55.477	159850000	17	P11021	P11021
ACP2	Lysosomal acid phosphatase	-2.09483	NaN	-1.8161	2.35362	NaN	2.09387	5	5	5	17.7	17.7	17.7	48.344	0	317.21	195380000	9	P11117	P11117
HSPA8	Heat shock cognate 71 kDa protein	-0.285147	-0.449339	0.187165	-0.000664234	-0.148667	-0.00479341	10	8	8	22	18.6	18.6	70.897	0	58.8	326720000	18	P11142;P54652	P11142
PABPC1;PABPC4	Polyadenylate-binding protein 1;Polyadenylate-binding protein 4	NaN	-0.288203	-0.0575991	NaN	0.0721002	-0.0685232	1	1	1	1.6	1.6	1.6	70.67	0	6.2152	26361000	3	P11940;Q13310	P11940;Q13310
PCNA	Proliferating cell nuclear antigen	-0.524309	-0.100783	NaN	-0.15204	-0.195008	NaN	3	3	3	21.1	21.1	21.1	28.768	0	18.788	18505000	7	P12004	P12004
CKB	Creatine kinase B-type	0.00372136	0.314208	0.197306	-0.0471942	0.00733805	-0.0814143	11	11	11	32.5	32.5	32.5	42.644	0	88.846	590700000	42	P12277;P06732	P12277
XRCC6	X-ray repair cross-complementing protein 6	0.0957122	NaN	-0.0446124	0.189518	NaN	0.159098	3	3	3	4.4	4.4	4.4	69.842	0	17.726	23473000	6	P12956	P12956
XRCC5	X-ray repair cross-complementing protein 5	-0.639896	0.276083	-0.0844681	0.039923	0.114681	-0.750447	2	2	2	3.6	3.6	3.6	82.704	0	11.992	34575000	3	P13010	P13010
EEF2	Elongation factor 2	-0.0933133	-0.127452	-0.128927	0.0020647	-0.0128913	-0.0767858	16	16	15	21.2	21.2	20	95.337	0	183.07	901150000	37	P13639	P13639
PLS3	Plastin-3	0.0172064	-0.125943	-0.0958675	-0.0704018	-0.2116	0.0364617	3	3	3	5.1	5.1	5.1	70.81	0	33.38	92840000	6	P13797;P13796	P13797
ETFA	Electron transfer flavoprotein subunit alpha, mitochondrial	0.626341	-0.0452881	NaN	0.596694	-0.328044	NaN	1	1	1	4.8	4.8	4.8	35.079	0	6.1811	4343500	2	P13804	P13804
MIF	Macrophage migration inhibitory factor	-0.541245	0.355304	-3.04233	0.640583	0.910961	2.06457	4	4	4	41.7	41.7	41.7	12.476	0	76.268	1497100000	37	P14174	P14174
PKM	Pyruvate kinase PKM	-0.053892	-0.15661	-0.150204	0.068928	0.0716704	-0.0472494	17	17	17	34.3	34.3	34.3	57.936	0	185.63	1198500000	32	P14618;P30613	P14618
HSP90B1	Endoplasmin	0.210119	0.0754741	0.452604	-0.00518227	-0.20014	-0.162954	6	6	6	7.1	7.1	7.1	92.468	0	37.454	102080000	11	P14625;Q58FF3	P14625
SNRPB;SNRPN	Small nuclear ribonucleoprotein-associated proteins B and B;Small nuclear ribonucleoprotein-associated protein N	0.14066	0.420584	NaN	-0.371285	-0.121938	NaN	2	2	2	11.7	11.7	11.7	24.61	0	12.319	53513000	4	P14678;P63162	P14678;P63162
HNRNPL	Heterogeneous nuclear ribonucleoprotein L	0.0851226	0.152186	-0.0991036	-0.180059	0.091879	-0.218693	9	9	9	19.4	19.4	19.4	64.132	0	64.541	493390000	24	P14866;Q8WVV9	P14866
JUP	Junction plakoglobin	-0.0132766	-0.205592	-0.472951	2.90047	-0.690583	-0.129172	5	5	5	8.3	8.3	8.3	81.744	0	54.842	440760000	13	P14923	P14923
AKR1B1	Aldose reductase	-0.107081	0.0091992	0.0447792	0.0824205	-0.0846239	0.315228	6	6	6	19.9	19.9	19.9	35.853	0	35.403	56005000	8	P15121	P15121
EZR;RDX;MSN	Ezrin;Radixin;Moesin	0.0208453	-0.480646	-0.0752606	0.113776	-0.175318	0.0110681	4	4	4	5.6	5.6	5.6	69.412	0	23.203	72218000	5	P15311;P35241;P26038;P35240	P15311;P35241;P26038
NME1	Nucleoside diphosphate kinase A	-0.0844927	0.0339273	-0.282977	-0.124845	0.0507199	0.0637945	5	5	1	34.2	34.2	9.2	17.149	0	38.749	865580000	18	P15531	P15531
RPS2	40S ribosomal protein S2	0.214086	0.336157	0.20682	-0.154824	-0.0840479	-0.155993	6	6	6	18.8	18.8	18.8	31.324	0	89.13	330470000	23	P15880	P15880
DSP	Desmoplakin	-0.205694	NaN	-0.0313241	2.68548	NaN	-0.464236	14	14	14	5.2	5.2	5.2	331.77	0	107.14	147020000	16	P15924	P15924
HIST1H1D	Histone H1.3	0.121096	-0.146782	0.60033	-0.0512258	-0.378933	0.15934	21	7	6	57.9	25.3	23.5	22.35	0	56.502	878490000	18	P16402;REV__P16402	P16402
HIST1H1C	Histone H1.2	0.161625	-0.255354	0.650051	0.0780646	-0.429012	0.244965	23	8	8	60.6	23	23	21.364	0	61.599	2264700000	36	P16403	P16403
PCSK2	Neuroendocrine convertase 2	0.117636	-0.0534125	0.958343	0.0220798	-0.366666	-0.0224559	1	1	1	1.6	1.6	1.6	70.564	1	-2	120730000000	17	P16519	P16519
HSPA6;HSPA7	Heat shock 70 kDa protein 6;Putative heat shock 70 kDa protein 7	-0.189612	-0.292141	0.363953	-0.0725083	0.0873145	0.00063169	6	1	1	11.4	1.7	1.7	71.027	0	8.805	265450000	6	P17066;P48741	P17066;P48741
DDX5;DDX17	Probable ATP-dependent RNA helicase DDX5;Probable ATP-dependent RNA helicase DDX17	-0.0636595	NaN	0.347149	0.017277	NaN	-0.0849113	4	4	4	7.5	7.5	7.5	69.147	0	24.899	32459000	4	P17844;Q92841	P17844;Q92841
PFKL	ATP-dependent 6-phosphofructokinase, liver type	-1.0073	0.00478643	-0.471445	0.437943	-0.310617	0.650288	6	4	4	10.1	8.1	8.1	85.018	0	29.536	39243000	5	P17858	P17858
PSMC3	26S protease regulatory subunit 6A	0.162672	0.681942	NaN	-0.076443	0.136603	NaN	1	1	1	1.6	1.6	1.6	49.203	0.0022676	6.1341	13166000	2	P17980	P17980
RPL35A	60S ribosomal protein L35a	-0.117959	0.121831	-0.165746	0.334294	0.151218	0.0748677	3	3	3	20	20	20	12.538	0	18.852	52477000	5	P18077	P18077
RPL7	60S ribosomal protein L7	0.46311	1.53402	-1.42463	0.000664234	0.746347	-1.02609	12	12	12	46.8	46.8	46.8	29.225	0	132.47	853840000	42	P18124	P18124
RPL17	60S ribosomal protein L17	0.0106509	NaN	0.0277568	0.0798372	NaN	0.299445	2	2	2	8.7	8.7	8.7	21.397	0	12.154	40440000	2	P18621	P18621
PGAM1;PGAM2;PGAM4	Phosphoglycerate mutase 1;Phosphoglycerate mutase 2;Probable phosphoglycerate mutase 4	-0.14467	-0.242852	-0.483715	0.0772858	0.470691	-0.0570416	5	5	5	18.9	18.9	18.9	28.804	0	31.536	57963000	9	P18669;P15259;Q8N0Y7	P18669;P15259;Q8N0Y7
NCL	Nucleolin	0.048499	-0.282219	-0.109231	-0.0712986	0.0274457	-0.106433	10	10	10	16.1	16.1	16.1	76.613	0	72.686	105700000	17	P19338	P19338
HK1	Hexokinase-1	NaN	0.365013	-0.954139	NaN	0.277371	-0.154324	2	2	2	3.1	3.1	3.1	102.48	0	12.184	18394000	2	P19367	P19367
PRPS1;PRPS1L1;PRPS2	Ribose-phosphate pyrophosphokinase 1;Ribose-phosphate pyrophosphokinase 3;Ribose-phosphate pyrophosphokinase 2	NaN	-0.0341266	0.628272	NaN	-0.338836	-0.603834	2	2	2	7.9	7.9	7.9	34.834	0	11.415	9908800	2	P60891;P21108;P11908	P60891;P21108;P11908
FLNA	Filamin-A	0.127323	-0.413335	-0.129351	0.324644	-0.154378	0.057386	27	27	27	14.8	14.8	14.8	280.74	0	183.47	655280000	57	P21333;O75369;Q14315	P21333
VDAC1	Voltage-dependent anion-selective channel protein 1	-0.327778	0.283041	-0.0189779	0.268582	0.481564	0.186625	2	2	2	12	12	12	30.772	0	13.399	36041000	4	P21796	P21796
SDHB	Succinate dehydrogenase [ubiquinone] iron-sulfur subunit, mitochondrial	0.146278	NaN	0.532462	-0.291945	NaN	-0.00549734	1	1	1	3.2	3.2	3.2	31.629	0.0064795	6.0284	34250000	2	P21912	P21912
GART	Trifunctional purine biosynthetic protein adenosine-3;Phosphoribosylamine--glycine ligase;Phosphoribosylformylglycinamidine cyclo-ligase;Phosphoribosylglycinamide formyltransferase	NaN	-0.0788556	0.56729	NaN	-0.41384	0.0508591	2	2	2	3.1	3.1	3.1	107.77	0	12.001	10389000	3	P22102	P22102
SCP2	Non-specific lipid-transfer protein	-0.201943	0.608945	-0.0255158	-0.28178	0.224207	-0.188169	2	2	2	4.2	4.2	4.2	58.993	0	12.273	29273000	4	P22307	P22307
UBA1	Ubiquitin-like modifier-activating enzyme 1	-0.104733	NaN	0.0968322	0.0261537	NaN	-0.198372	5	5	5	5.1	5.1	5.1	117.85	0	31.881	70181000	7	P22314	P22314
SPRR2B;SPRR2D;SPRR2E;SPRR2A;SPRR2G	Small proline-rich protein 2B;Small proline-rich protein 2D;Small proline-rich protein 2E;Small proline-rich protein 2A;Small proline-rich protein 2G	-0.754514	NaN	-0.0323595	2.14954	NaN	-0.882283	1	1	1	18.1	18.1	18.1	7.9754	0	7.0071	76930000	2	P35325;P22532;P22531;P35326;Q9BYE4	P35325;P22532;P22531;P35326;Q9BYE4
HNRNPA2B1	Heterogeneous nuclear ribonucleoproteins A2/B1	0.0583479	0.0644253	-0.406916	-0.164967	0.162047	-0.214322	12	12	12	45.3	45.3	45.3	37.429	0	323.31	1141200000	42	P22626	P22626
SFPQ	Splicing factor, proline- and glutamine-rich	0.0168087	-0.327638	-0.259347	0.0285181	0.435267	0.151728	3	3	3	5.1	5.1	5.1	76.149	0	17.888	39407000	6	P23246	P23246
PPIB	Peptidyl-prolyl cis-trans isomerase B	0.101874	0.256982	0.404513	-0.274933	0.125072	-0.148608	3	3	3	11.1	11.1	11.1	23.742	0	39.264	61803000	6	P23284	P23284
RPS3	40S ribosomal protein S3	0.0718836	0.361738	0.337477	-0.203747	0.0395736	-0.119441	4	4	4	13.2	13.2	13.2	26.688	0	23.557	86988000	5	P23396	P23396
AHCY	Adenosylhomocysteinase	0.0287125	-0.359389	-0.0513889	-0.0447985	0.342073	0.0994464	5	5	5	11.8	11.8	11.8	47.716	0	29.934	89036000	11	P23526	P23526
CFL1	Cofilin-1	-0.063302	0.446635	-0.406899	-0.0497111	0.031068	-0.395519	2	2	2	6.6	6.6	6.6	18.502	0	11.93	83245000	6	P23528	P23528
EIF4B	Eukaryotic translation initiation factor 4B	0.177195	-0.00227362	1.60203	0.0465394	-0.429353	-0.11282	6	6	6	12.8	12.8	12.8	69.15	0	57.189	138640000	12	P23588	P23588
RPS12	40S ribosomal protein S12	-0.0549179	0.711594	-0.418468	0.112306	0.284989	0.0203869	5	5	5	31.8	31.8	31.8	14.515	0	31.864	336360000	13	P25398	P25398
ATP5A1	ATP synthase subunit alpha, mitochondrial	-0.166057	-0.196056	-0.41266	0.0515616	0.186696	0.032748	2	2	2	2.9	2.9	2.9	59.75	0	24.677	57610000	4	P25705	P25705
PSMA1	Proteasome subunit alpha type-1	-0.0803584	0.226179	NaN	0.00344777	0.145285	NaN	4	4	4	15.2	15.2	15.2	29.555	0	25.311	83770000	8	P25786	P25786
RPL13	60S ribosomal protein L13	NaN	0.573628	0.044034	NaN	-0.128671	-0.150483	3	3	3	15.2	15.2	15.2	24.261	0	17.959	37540000	3	P26373	P26373
PTBP1	Polypyrimidine tract-binding protein 1	0.0122794	0.200597	0.231083	-0.275174	-0.0168335	-0.522927	7	7	6	16.2	16.2	16	57.221	0	52.78	109700000	14	P26599;O95758	P26599
EEF1G	Elongation factor 1-gamma	-0.0622052	0.0598624	-0.275383	-0.0601308	0.0459629	0.0690186	12	12	12	24.5	24.5	24.5	50.118	0	207.28	1023100000	47	P26641	P26641
RPL10;RPL10L	60S ribosomal protein L10;60S ribosomal protein L10-like	NaN	-0.437427	-0.156748	NaN	0.148279	0.136299	1	1	1	5.6	5.6	5.6	24.604	0	6.7641	27976000	2	P27635;Q96L21	P27635;Q96L21
CALR	Calreticulin	-0.0184574	-0.00954419	0.428355	-0.132187	-0.0219207	-0.24655	7	7	7	16.5	16.5	16.5	48.141	0	45.455	386020000	19	P27797	P27797
PSMA5	Proteasome subunit alpha type-5	0.223899	0.0317072	0.236348	-0.00616777	-0.0206587	0.0143342	3	3	3	14.9	14.9	14.9	26.411	0	45.084	377040000	6	P28066	P28066
PSMB5	Proteasome subunit beta type-5	0.422639	0.382935	0.0534111	-0.21386	0.268002	-0.130431	7	7	7	32.7	32.7	32.7	28.48	0	83.13	188550000	22	P28074	P28074
TKT	Transketolase	-0.269808	NaN	-0.728252	0.385854	NaN	0.394939	2	2	2	2.9	2.9	2.9	67.877	0	11.698	8684700	3	P29401	P29401
PRDX3	Thioredoxin-dependent peroxide reductase, mitochondrial	-0.226431	-0.322303	0.853374	-0.0354815	-0.0933251	0.0200955	2	2	2	9	9	9	27.692	0	12.853	29002000	5	P30048	P30048
RPL12	60S ribosomal protein L12	0.118674	0.604407	-0.263083	-0.241498	0.221174	-0.328735	8	8	8	59.4	59.4	59.4	17.818	0	108.55	711130000	28	P30050	P30050
PDIA3	Protein disulfide-isomerase A3	-0.442144	-0.153045	NaN	0.426145	0.37084	NaN	3	3	3	7.3	7.3	7.3	56.782	0	19.184	59006000	7	P30101	P30101
DNAJA1	DnaJ homolog subfamily A member 1	0.244259	0.0686546	0.308585	-0.123896	0.0678118	-0.230626	2	2	2	8.1	8.1	8.1	44.868	0	12.236	35503000	3	P31689	P31689
HNRNPH1	Heterogeneous nuclear ribonucleoprotein H;Heterogeneous nuclear ribonucleoprotein H, N-terminally processed	-0.138527	0.181181	0.274356	0.111492	-0.244935	0.000913978	9	9	8	28.1	28.1	24.3	49.229	0	64.055	262870000	24	P31943;P55795	P31943
YWHAB	14-3-3 protein beta/alpha;14-3-3 protein beta/alpha, N-terminally processed	-0.00409722	0.109627	0.357597	-0.859108	0.452629	-0.844733	6	2	2	25.6	14.6	14.6	28.082	0	12.838	58540000	5	P31946	P31946
SFN	14-3-3 protein sigma	0.0294111	0.573775	-0.744564	-0.261178	0.226274	-0.623341	6	4	4	28.2	21.4	21.4	27.774	0	108.55	276950000	9	P31947	P31947
STIP1	Stress-induced-phosphoprotein 1	0.298846	-0.0590073	0.245175	-0.0562812	-0.266294	0.087711	2	2	2	3.1	3.1	3.1	62.639	0	12.052	23754000	6	P31948	P31948
PRDX2	Peroxiredoxin-2	-0.643486	0.0383431	-0.588303	0.549978	0.0872078	-0.0293949	4	3	3	23.2	17.7	17.7	21.892	0	18.791	151340000	14	P32119	P32119
DUT	Deoxyuridine 5-triphosphate nucleotidohydrolase, mitochondrial	0.319812	0.754411	-0.930211	-0.428683	0.468381	-1.0373	5	5	5	19.8	19.8	19.8	26.563	0	256.63	500740000	22	P33316	P33316
SHMT2;SHMT1	Serine hydroxymethyltransferase, mitochondrial;Serine hydroxymethyltransferase, cytosolic	-0.224383	-0.266979	NaN	0.150206	0.0844012	NaN	2	2	2	5	5	5	55.992	0	12.322	42559000	3	P34897;P34896	P34897;P34896
HSPA4	Heat shock 70 kDa protein 4	-0.101099	NaN	0.467055	-1.08469	NaN	-0.216004	6	6	4	8.9	8.9	6.3	94.33	0	35.396	46696000	8	P34932;O95757	P34932
PHB	Prohibitin	0.116006	0.269832	NaN	-0.178284	0.279096	NaN	3	3	3	13.6	13.6	13.6	29.804	0	21.945	21627000	5	P35232	P35232
RPL22	60S ribosomal protein L22	-0.317549	-0.12098	NaN	0.279897	0.0459578	NaN	4	4	4	32.8	32.8	32.8	14.787	0	26.556	159640000	10	P35268	P35268
MYH9	Myosin-9	0.325757	-0.420745	-0.165757	0.025978	0.0615685	-0.135771	12	12	11	7.4	7.4	6.6	226.53	0	75.835	160500000	23	P35579;P35749	P35579
RPL4	60S ribosomal protein L4	0.00358212	-0.0487987	0.304829	-0.10743	-0.215855	0.00530148	6	6	6	12.6	12.6	12.6	47.697	0	211.09	179340000	17	P36578	P36578
TAGLN2	Transgelin-2	-0.0304649	0.288152	0.0715405	0.0257572	0.0933696	0.00162399	11	11	11	50.3	50.3	50.3	22.391	0	225.74	482150000	40	P37802;Q9UI15	P37802
TALDO1	Transaldolase	NaN	1.20166	-0.374716	NaN	0.300819	-0.894367	4	4	4	11	11	11	37.54	0	23.837	72540000	5	P37837	P37837
RBMX	RNA-binding motif protein, X chromosome;RNA-binding motif protein, X chromosome, N-terminally processed	-0.605502	-1.79673	NaN	0.538599	0.583458	NaN	2	2	2	6.6	6.6	6.6	42.331	0	11.163	10369000	2	P38159	P38159
HSPA9	Stress-70 protein, mitochondrial	-0.588525	0.276612	-0.657248	-0.0253361	0.145639	-0.53709	3	3	3	6.5	6.5	6.5	73.68	0	18.334	40372000	8	P38646	P38646
EIF4A3	Eukaryotic initiation factor 4A-III;Eukaryotic initiation factor 4A-III, N-terminally processed	0.111132	0.141553	0.063118	0.538132	-0.0750805	0.0102084	5	4	4	14.6	12.4	12.4	46.871	0	29.717	113570000	11	P38919	P38919
RPL3	60S ribosomal protein L3	-0.301343	-0.206515	-0.0226376	0.139608	0.102118	0.16423	7	7	7	12.7	12.7	12.7	46.108	0	41.944	149560000	14	P39023;Q92901	P39023
CCT6A	T-complex protein 1 subunit zeta	-0.481796	-1.06557	NaN	0.277666	0.0340775	NaN	2	2	2	4.7	4.7	4.7	58.024	0	12.276	41770000	4	P40227	P40227
RPL13A	60S ribosomal protein L13a	0.333933	-0.0681389	NaN	0.132684	-0.260057	NaN	2	2	2	8.9	8.9	8.9	23.577	0	12.433	38692000	5	P40429	P40429
MDH1	Malate dehydrogenase, cytoplasmic	0.131401	-0.294477	0.503914	0.461152	-0.00253248	0.588434	4	4	4	11.7	11.7	11.7	36.426	0	24.357	65991000	6	P40925	P40925
MDH2	Malate dehydrogenase, mitochondrial	0.114731	0.108157	-0.310351	-0.0363749	0.0373477	-0.2198	3	3	3	10.1	10.1	10.1	35.503	0	20.138	70447000	9	P40926	P40926
EIF2S3;EIF2S3L	Eukaryotic translation initiation factor 2 subunit 3;Putative eukaryotic translation initiation factor 2 subunit 3-like protein	0.0700048	-0.115699	-0.0874543	0.323181	-0.286741	0.0739429	1	1	1	3.4	3.4	3.4	51.109	0	6.4907	13641000	3	P41091;Q2VIR3	P41091;Q2VIR3
PNPLA4	Patatin-like phospholipase domain-containing protein 4	-0.179491	NaN	-0.241059	0.328841	NaN	0.222022	3	3	3	16.2	16.2	16.2	27.98	0	18.468	16096000	4	P41247	P41247
RPL35	60S ribosomal protein L35	0.00548124	NaN	0.324986	-0.134014	NaN	0.29072	2	2	2	14.6	14.6	14.6	14.551	0	11.28	23771000	2	P42766	P42766
MATR3	Matrin-3	-0.134003	-0.103939	-0.256482	-0.0117209	0.010627	0.136535	3	3	3	3.3	3.3	3.3	94.622	0	52.216	26923000	5	P43243	P43243
NAMPT	Nicotinamide phosphoribosyltransferase	-0.181152	0.372671	-0.146166	-0.0818902	0.00259256	-0.560277	1	1	1	1.8	1.8	1.8	55.52	0.0044743	6.1167	15612000	4	P43490	P43490
VDAC2	Voltage-dependent anion-selective channel protein 2	0.024874	0.148261	-0.188479	0.197061	0.0807074	0.28758	5	5	5	22.1	22.1	22.1	31.566	0	56.164	231360000	12	P45880	P45880
RPL27A	60S ribosomal protein L27a	0.203852	-0.153765	NaN	-0.0882072	-0.294897	NaN	3	3	3	29.1	29.1	29.1	16.561	0	18.6	34264000	5	P46776	P46776
RPL21	60S ribosomal protein L21	-0.0574887	-0.162806	0.250883	0.127428	0.0253197	0.658873	4	4	4	26.2	26.2	26.2	18.565	0	25.234	106380000	14	P46778	P46778
RPL28	60S ribosomal protein L28	0.168082	0.504781	0.0943124	0.143903	0.00253248	0.47938	3	3	3	19.7	19.7	19.7	15.747	0	18.244	39240000	7	P46779	P46779
RPS9	40S ribosomal protein S9	0.134691	-0.200743	0.176817	0.106086	-0.239179	-0.259292	3	3	3	16.5	16.5	16.5	22.591	0	19.052	140690000	7	P46781	P46781
RPS5	40S ribosomal protein S5;40S ribosomal protein S5, N-terminally processed	-0.0552392	0.308347	-0.0985274	-0.105333	-0.117026	0.0193489	8	8	8	47.1	47.1	47.1	22.876	0	107.78	326210000	24	P46782	P46782
RPS10	40S ribosomal protein S10	-0.102435	-0.181998	-0.382063	0.0538869	0.184919	0.23752	1	1	1	5.5	5.5	5.5	18.898	0	18.823	163980000	3	P46783	P46783
RPL29	60S ribosomal protein L29	0.0513818	-0.357956	0.891752	0.207553	-0.185102	0.392653	4	4	4	23.3	23.3	23.3	17.752	0	24.896	123400000	11	P47914	P47914
ATP5O	ATP synthase subunit O, mitochondrial	0.24413	-0.0572812	0.602955	-0.148211	-0.37349	0.154169	7	7	7	39	39	39	23.277	0	102.3	130810000	19	P48047	P48047
PREP	Prolyl endopeptidase	-0.857979	-1.19238	-0.340792	0.563903	0.671693	0.671393	10	10	10	16.6	16.6	16.6	80.699	0	64.718	135040000	20	P48147	P48147
CCT5	T-complex protein 1 subunit epsilon	0.272338	-0.480135	NaN	0.535206	-0.240426	NaN	2	2	2	4.3	4.3	4.3	59.67	0	12.002	38365000	3	P48643	P48643
RPL34	60S ribosomal protein L34	0.0541214	-0.132748	0.0941705	0.0381417	-0.0883681	0.0987569	2	2	2	12	12	12	13.293	0	124.82	179020000	4	P49207	P49207
CCT3	T-complex protein 1 subunit gamma	-0.541972	0.00304848	-0.0183018	0.0623727	-0.195904	-0.380887	3	3	3	6.4	6.4	6.4	60.533	0	17.729	42292000	6	P49368	P49368
TUFM	Elongation factor Tu, mitochondrial	0.104017	0.0586291	0.26893	-0.160396	-0.0262419	-0.124058	6	6	6	19.9	19.9	19.9	49.541	0	69.21	78610000	14	P49411	P49411
HINT1	Histidine triad nucleotide-binding protein 1	-0.208875	-0.145824	-0.115372	0.80575	0.237034	0.242794	2	2	2	19	19	19	13.802	0	18.722	99185000	8	P49773	P49773
SERPINH1	Serpin H1	0.313064	0.154983	0.588243	-0.196121	-0.235215	0.049121	1	1	1	1.9	1.9	1.9	46.44	0	13.285	67042000	4	P50454	P50454
VASP	Vasodilator-stimulated phosphoprotein	0.163719	-0.37477	0.39098	-0.212293	-0.279177	0.205777	1	1	1	5.5	5.5	5.5	39.829	0	6.5052	426750000	4	P50552	P50552
RPL14	60S ribosomal protein L14	-0.0918591	-0.156837	0.109398	-0.0496694	0.162926	0.399671	3	3	3	14	14	14	23.432	0	18.296	23224000	7	P50914	P50914
CCT8	T-complex protein 1 subunit theta	-1.00276	0.130018	NaN	0.311156	-0.0223498	NaN	2	2	2	3.5	3.5	3.5	59.62	0	11.703	52607000	4	P50990	P50990
CCT4	T-complex protein 1 subunit delta	-0.0149993	-0.0467401	-0.0766997	0.364394	0.0308387	0.103958	3	3	3	5.8	5.8	5.8	57.924	0	19.49	114640000	9	P50991	P50991
RAB5C	Ras-related protein Rab-5C	0.18875	NaN	0.363055	-0.229099	NaN	0.186516	1	1	1	5.6	5.6	5.6	23.482	0	6.4961	15591000	2	P51148	P51148
BCAP31	B-cell receptor-associated protein 31	0.0332936	0.762288	-0.573517	-0.152283	0.751414	-0.127051	2	2	2	7.7	7.7	7.7	27.991	0	12.052	50679000	3	P51572	P51572
PGD	6-phosphogluconate dehydrogenase, decarboxylating	-0.817907	NaN	-0.0552399	0.713372	NaN	0.0803118	3	3	3	7.9	7.9	7.9	53.139	0	18.523	21287000	4	P52209	P52209
HNRNPM	Heterogeneous nuclear ribonucleoprotein M	0.0661635	0.184075	0.553605	-0.0269455	0.094841	0.571839	5	5	4	7.7	7.7	5.5	77.515	0	70.51	336750000	5	P52272	P52272
KPNA2	Importin subunit alpha-1	0.432701	-0.956915	NaN	0.0488387	0.0988424	NaN	1	1	1	3.8	3.8	3.8	57.861	0.0044543	6.1028	9495000	2	P52292	P52292
ARHGDIA	Rho GDP-dissociation inhibitor 1	0.261569	0.268962	-0.279703	-0.0874457	-0.0361886	-0.595116	4	4	4	27	27	27	23.207	0	35.768	122970000	16	P52565	P52565
HNRNPF	Heterogeneous nuclear ribonucleoprotein F;Heterogeneous nuclear ribonucleoprotein F, N-terminally processed	-0.120931	0.0207283	0.502949	0.377667	-0.0344004	-0.236215	3	2	2	11.1	7	7	45.671	0	13.668	33596000	6	P52597	P52597
PPP5C;PPP5D1	Serine/threonine-protein phosphatase 5;Protein PPP5D1	0.208702	NaN	0.203193	0.6586	NaN	-0.0614781	2	2	2	4	4	4	56.878	0	11.764	10149000	3	P53041;E7EU14	P53041;E7EU14
CTSC	Dipeptidyl peptidase 1;Dipeptidyl peptidase 1 exclusion domain chain;Dipeptidyl peptidase 1 heavy chain;Dipeptidyl peptidase 1 light chain	-0.49504	0.116964	0.512962	0.247488	-0.15767	0.146034	2	2	2	7.6	7.6	7.6	51.853	0	14.689	39728000	5	P53634	P53634
VCP	Transitional endoplasmic reticulum ATPase	-0.0582032	-6.71744e-05	NaN	0.0595986	0.136104	NaN	6	6	6	9.2	9.2	9.2	89.321	0	41.934	33376000	7	P55072	P55072
NPEPPS	Puromycin-sensitive aminopeptidase	-0.437397	-0.138068	-0.198162	0.114052	0.180802	-0.00788927	1	1	1	1	1	1	103.28	0.0044053	6.0849	21365000	6	P55786	P55786
EPPK1	Epiplakin	0.712278	0.216897	NaN	0.193542	-0.113409	NaN	1	1	1	1.3	1.3	1.3	555.65	0	6.9296	12616000	2	P58107	P58107
TPI1	Triosephosphate isomerase	0.0715618	0.619197	-0.203486	-0.110747	0.222274	-0.231795	14	14	14	72.3	72.3	72.3	26.669	0	323.31	1836400000	70	P60174	P60174
MYL6	Myosin light polypeptide 6	0.594848	1.09486	-0.915409	-0.145312	-0.247492	-0.366274	5	5	5	43	43	43	16.93	0	36.166	128050000	21	P60660;P14649	P60660
ACTB	Actin, cytoplasmic 1;Actin, cytoplasmic 1, N-terminally processed	-0.380834	-0.3973	-0.285812	0.00904393	0.0774224	-0.0687103	19	19	1	58.9	58.9	4.5	41.736	0	323.31	10943000000	178	P60709;Q6S8J3;A5A3E0;P0CG38;Q562R1;P0CG39;Q9BYX7	P60709
EIF4A1;EIF4A2	Eukaryotic initiation factor 4A-I;Eukaryotic initiation factor 4A-II;Eukaryotic initiation factor 4A-II, N-terminally processed	-0.154745	-0.197269	-0.169042	0.00608218	0.0075866	-0.0326686	5	5	4	13.3	13.3	11.1	46.153	0	36.832	183990000	11	P60842;Q14240	P60842;Q14240
CDC42	Cell division control protein 42 homolog	-0.0356666	0.409332	-0.226274	-0.185649	-0.150688	-0.0838335	2	2	2	11	11	11	21.258	0	12.891	102390000	6	P60953	P60953
DSTN	Destrin	-0.037132	0.120592	-0.916583	0.931818	-0.149318	-0.90624	2	2	2	10.9	10.9	10.9	18.506	0	12.918	24821000	4	P60981	P60981
ACTR2	Actin-related protein 2	-0.0318592	NaN	0.605834	0.307409	NaN	-0.433736	2	2	2	6.9	6.9	6.9	44.76	0	12.069	8820300	2	P61160	P61160
RPS3A	40S ribosomal protein S3a	0.134271	0.220459	0.223562	-0.00527835	-0.177205	-0.332371	5	5	5	13.6	13.6	13.6	29.945	0	40.986	75249000	8	P61247	P61247
RPL15	60S ribosomal protein L15	-0.0193523	0.107543	-0.274976	0.0365055	0.0179117	0.112198	5	5	5	22.5	22.5	22.5	24.146	0	34.473	338550000	19	P61313	P61313
RPL37	60S ribosomal protein L37	0.246543	NaN	0.306638	0.195186	NaN	0.142259	3	3	3	27.8	27.8	27.8	11.078	0	17.956	105450000	3	P61927	P61927
SUMO2	Small ubiquitin-related modifier 2	-0.0932021	0.164648	0.494172	0.560964	-0.0842851	0.342031	2	2	1	21.1	21.1	10.5	10.871	0	9.8777	88557000	3	P61956	P61956
HNRNPK	Heterogeneous nuclear ribonucleoprotein K	-0.065503	-0.132581	-0.0836096	-0.0276849	0.0992762	-0.0265768	4	4	4	13.4	13.4	13.4	50.976	0	31.555	112550000	11	P61978	P61978
YWHAG	14-3-3 protein gamma;14-3-3 protein gamma, N-terminally processed	0.126247	0.592131	NaN	-0.200392	-0.0161672	NaN	4	3	3	18.6	15.4	15.4	28.302	0	17.715	207630000	7	P61981	P61981
RPS8	40S ribosomal protein S8	0.131897	-0.145419	0.632465	-0.0083307	-0.154459	0.0640361	2	2	2	12.5	12.5	12.5	24.205	0	13.803	65836000	5	P62241	P62241
RPS15A	40S ribosomal protein S15a	-0.13838	-0.177481	0.214469	-0.00269747	0.156839	-0.0293652	1	1	1	6.2	6.2	6.2	14.839	0	6.6317	122510000	3	P62244	P62244
RPS16	40S ribosomal protein S16	NaN	0.0464974	-0.233289	NaN	-0.176507	0.0550184	3	3	3	22.6	22.6	22.6	16.445	0	36.11	26222000	6	P62249	P62249
YWHAE	14-3-3 protein epsilon	-0.16799	0.80339	-0.241743	-0.337267	0.111666	-0.207032	6	5	5	35.3	32.2	32.2	29.174	0	110.56	202790000	11	P62258	P62258
RPS14	40S ribosomal protein S14	-0.30508	-0.264925	0.13145	0.0364643	0.144359	0.0869104	5	5	5	31.8	31.8	31.8	16.273	0	36.353	156390000	11	P62263	P62263
RPS23	40S ribosomal protein S23	-0.110034	0.0613142	0.212895	-0.119147	-0.246073	0.136199	2	2	2	15.4	15.4	15.4	15.807	0	11.9	16399000	3	P62266	P62266
RPS11	40S ribosomal protein S11	0.109926	0.014964	-0.0272775	-0.018489	-0.0765254	0.221987	5	5	5	23.4	23.4	23.4	18.431	0	30.247	156870000	10	P62280	P62280
SNRPE	Small nuclear ribonucleoprotein E	0.431182	NaN	0.463295	0.0979278	NaN	0.752055	1	1	1	17.4	17.4	17.4	10.803	0	6.6572	73610000	3	P62304	P62304
RPL7A	60S ribosomal protein L7a	0.116882	-0.185757	0.355477	-0.0182098	-0.223325	-0.0306302	11	11	11	43.2	43.2	43.2	29.995	0	182.23	649950000	33	P62424	P62424
RPL23A	60S ribosomal protein L23a	0.115159	-0.0455372	-0.0426401	-0.168552	-0.31004	-0.474967	4	4	4	30.1	30.1	30.1	17.695	0	24.774	201940000	9	P62750	P62750
RPS6	40S ribosomal protein S6	0.0674996	-0.0881693	0.652892	-0.0831503	-0.125477	-0.158114	5	5	5	18.5	18.5	18.5	28.68	0	29.502	105620000	6	P62753	P62753
HIST1H4A	Histone H4	0.0601633	-0.560803	0.312013	0.0831603	-0.253657	0.237	7	7	7	53.4	53.4	53.4	11.367	0	199.02	3795600000	37	P62805	P62805
RAN	GTP-binding nuclear protein Ran	0.579579	1.19295	-1.52668	-0.460921	0.660046	-0.79871	11	11	11	41.2	41.2	41.2	24.423	0	153.02	1033300000	42	P62826	P62826
RPL23	60S ribosomal protein L23	0.394902	-0.181407	0.380237	0.252449	-0.26562	-0.112064	2	2	2	20	20	20	14.865	0	16.492	22393000	3	P62829	P62829
RPS25	40S ribosomal protein S25	0.210152	0.135588	0.349321	-0.414965	-0.146089	0.00340569	2	2	2	16	16	16	13.742	0	30.605	80178000	5	P62851	P62851
RPS26;RPS26P11	40S ribosomal protein S26;Putative 40S ribosomal protein S26-like 1	NaN	0.0916819	0.150599	NaN	-0.212094	-0.0181398	3	3	3	36.5	36.5	36.5	13.015	0	18.592	48324000	5	P62854;Q5JNZ5	P62854;Q5JNZ5
RPS28	40S ribosomal protein S28	0.465985	1.17909	0.141406	-0.439897	0.407469	-0.343008	2	2	2	33.3	33.3	33.3	7.8409	0	323.31	287430000	10	P62857	P62857
GNB1;GNB2;GNB4	Guanine nucleotide-binding protein G(I)/G(S)/G(T) subunit beta-1;Guanine nucleotide-binding protein G(I)/G(S)/G(T) subunit beta-2;Guanine nucleotide-binding protein subunit beta-4	-0.0628158	-0.0220183	-0.223124	-0.150709	-0.0903407	-0.137157	1	1	1	2.9	2.9	2.9	37.377	0.0022624	6.1296	52154000	4	P62873;P62879;Q9HAV0	P62873;P62879;Q9HAV0
RPL30	60S ribosomal protein L30	-0.523986	0.219967	-0.0953298	0.00169659	0.404987	0.00526786	3	3	3	34.8	34.8	34.8	12.784	0	21.219	55120000	5	P62888	P62888
RPL10A	60S ribosomal protein L10a	0.299736	0.806631	-0.684661	-0.379166	0.252405	-0.405498	4	4	4	21.2	21.2	21.2	24.831	0	60.754	198640000	13	P62906	P62906
RPL11	60S ribosomal protein L11	-0.170066	0.277874	NaN	0.256104	0.141634	NaN	1	1	1	7.9	7.9	7.9	20.252	0	6.7447	90075000	3	P62913	P62913
RPL8	60S ribosomal protein L8	-0.760293	0.0885727	0.125488	0.0565509	-0.270541	0.0119069	3	3	3	10.9	10.9	10.9	28.024	0	18.159	47576000	6	P62917	P62917
PPIA	Peptidyl-prolyl cis-trans isomerase A;Peptidyl-prolyl cis-trans isomerase A, N-terminally processed	-0.254265	-0.0699449	-0.094469	0.0701303	0.0424793	-0.244866	7	7	7	64.2	64.2	64.2	18.012	0	50.705	737560000	20	P62937;Q9Y536;F5H284;P0DN37;P0DN26;A0A0B4J2A2;A0A075B767;A0A075B759	P62937
FKBP1A	Peptidyl-prolyl cis-trans isomerase FKBP1A	0.0366096	0.405195	NaN	0.211678	-0.205422	NaN	1	1	1	12	12	12	11.951	0	7.5686	45929000	2	P62942	P62942
RPS27A;UBC;UBB;UBA52	Ubiquitin-40S ribosomal protein S27a;Ubiquitin;40S ribosomal protein S27a;Polyubiquitin-C;Ubiquitin;Polyubiquitin-B;Ubiquitin;Ubiquitin-60S ribosomal protein L40;Ubiquitin;60S ribosomal protein L40	-0.271697	-0.171683	0.0694864	0.0163722	-0.193139	-0.176801	5	5	5	35.9	35.9	35.9	17.965	0	49.906	211180000	12	P62979;P0CG48;P0CG47;P62987;A0A2R8Y422	P62979;P0CG48;P0CG47;P62987;A0A2R8Y422
TRA2A;TRA2B	Transformer-2 protein homolog alpha;Transformer-2 protein homolog beta	0.0052433	-0.120991	NaN	0.298708	-0.0543966	NaN	1	1	1	3.5	3.5	3.5	32.688	1	-2	80646000	2	Q13595;P62995	Q13595;P62995
RAC1	Ras-related C3 botulinum toxin substrate 1	-0.239778	NaN	-1.11334	0.279658	NaN	0.0729132	2	2	2	14.6	14.6	14.6	21.45	0	11.634	6478400	2	P63000	P63000
YWHAZ	14-3-3 protein zeta/delta	0.0175636	0.660897	-0.408852	-0.314692	0.233706	-0.437365	9	9	5	38	38	26.9	27.745	0	121.68	1747900000	40	P63104	P63104
DYNLL1;DYNLL2	Dynein light chain 1, cytoplasmic;Dynein light chain 2, cytoplasmic	-0.339697	0.018012	-0.410473	0.434065	-0.12399	-0.180103	2	2	2	37.1	37.1	37.1	10.366	0	14.418	39967000	10	P63167;Q96FJ2	P63167;Q96FJ2
GNB2L1	Guanine nucleotide-binding protein subunit beta-2-like 1;Guanine nucleotide-binding protein subunit beta-2-like 1, N-terminally processed	NaN	-0.0514515	0.196548	NaN	-0.316024	-0.0623163	4	4	4	19.6	19.6	19.6	35.076	0	24.521	36966000	4	P63244	P63244
ACTG1	Actin, cytoplasmic 2;Actin, cytoplasmic 2, N-terminally processed	-0.600725	-0.538824	-0.193632	-0.153944	-0.0509169	-0.0984341	19	1	1	58.9	4.5	4.5	41.792	0	27.891	152970000	9	P63261	P63261
EEF1A1;EEF1A1P5	Elongation factor 1-alpha 1;Putative elongation factor 1-alpha-like 3	-0.173956	-0.0629776	-0.126654	0.0311644	0.0420623	0.0299141	16	16	16	46.3	46.3	46.3	50.14	0	323.31	3316000000	98	P68104;Q5VTE0;Q05639	P68104;Q5VTE0
TUBA1B;TUBA4A	Tubulin alpha-1B chain;Tubulin alpha-4A chain	-0.178968	-0.0595372	-0.337257	0.0521576	0.0816422	-0.0358895	12	12	1	36.1	36.1	2.9	50.151	0	323.31	1442300000	66	P68363;P68366	P68363;P68366
TUBB4B;TUBB4A	Tubulin beta-4B chain;Tubulin beta-4A chain	-0.484563	0.0427538	0.170323	0.101963	-0.0879852	-0.052569	13	1	1	38.9	3.8	3.8	49.83	0	7.2879	134970000	6	P68371;P04350	P68371;P04350
HIST1H3A;HIST2H3A;HIST3H3;HIST2H3PS2	Histone H3.1;Histone H3.2;Histone H3.1t;Histone H3	0.117044	0.201754	0.623372	-0.158672	-0.34138	0.00609815	5	5	2	24.3	24.3	7.4	15.404	0	119.6	11225000000	25	P68431;Q71DI3;Q16695;Q5TEC6;Q6NXT2	P68431;Q71DI3;Q16695;Q5TEC6
CCT2	T-complex protein 1 subunit beta	-0.387127	-0.576764	0.660377	0.843867	-0.358998	0.185436	4	4	4	10.8	10.8	10.8	57.488	0	26.293	49811000	7	P78371	P78371
GSTO1	Glutathione S-transferase omega-1	-0.0460269	0.0897816	-1.26332	0.216872	0.478677	0.66035	2	2	2	10	10	10	27.566	0	12.793	61980000	6	P78417	P78417
RPL24	60S ribosomal protein L24	0.191464	-0.0992511	0.530852	-0.135138	-0.390146	-0.0675524	6	6	6	26.8	26.8	26.8	17.779	0	98.684	325850000	14	P83731	P83731
ERH	Enhancer of rudimentary homolog	-0.169885	0.713915	-0.796925	0.0469067	0.737942	0.247772	4	4	4	52.9	52.9	52.9	12.259	0	106.94	625820000	9	P84090	P84090
H3F3A	Histone H3.3	-0.0608515	0.256854	0.289782	0.121333	-0.308514	0.212281	5	2	2	24.3	7.4	7.4	15.328	0	30.755	91350000	5	P84243	P84243
SLC25A3	Phosphate carrier protein, mitochondrial	-1.64553	-1.50816	-1.29053	1.40317	1.69514	1.5442	8	8	8	16.6	16.6	16.6	40.094	0	286.51	1110100000	35	Q00325	Q00325
CLTC	Clathrin heavy chain 1	0.0652522	-0.191554	-0.625083	0.0725336	-0.0206375	0.145645	10	10	10	7.7	7.7	7.7	191.61	0	63.543	174450000	19	Q00610	Q00610
FKBP3	Peptidyl-prolyl cis-trans isomerase FKBP3	NaN	0.133715	-0.636866	NaN	0.0455673	0.433956	2	2	2	10.3	10.3	10.3	25.177	0	12.063	31698000	3	Q00688	Q00688
HNRNPU	Heterogeneous nuclear ribonucleoprotein U	0.0132312	0.136308	-0.400575	-0.150559	0.098532	-0.165033	9	9	9	10.4	10.4	10.4	90.583	0	107.01	242170000	17	Q00839	Q00839
CAP1	Adenylyl cyclase-associated protein 1	-0.777532	NaN	0.475406	0.916812	NaN	-0.272409	2	2	2	7.6	7.6	7.6	51.901	0	13.014	14847000	4	Q01518	Q01518
PFKP	ATP-dependent 6-phosphofructokinase, platelet type	-1.57993	-1.47719	-0.86131	1.21391	1.14346	1.12102	23	23	21	32.8	32.8	30.7	85.595	0	207.37	898340000	52	Q01813;P08237	Q01813
RPL18A	60S ribosomal protein L18a	-0.221943	-0.290968	-0.0217943	0.360706	0.0386331	0.0869372	4	4	4	19.3	19.3	19.3	20.762	0	27.523	254980000	15	Q02543	Q02543
FKBP4	Peptidyl-prolyl cis-trans isomerase FKBP4;Peptidyl-prolyl cis-trans isomerase FKBP4, N-terminally processed	-0.078867	1.01983	NaN	-0.259986	0.00805163	NaN	2	2	2	7	7	7	51.804	0	11.958	22358000	3	Q02790	Q02790
RPL6	60S ribosomal protein L6	-0.282836	-0.358765	0.457867	0.213453	0.0899138	0.298711	4	4	4	12.8	12.8	12.8	32.728	0	211.09	64700000	10	Q02878	Q02878
EIF4G1	Eukaryotic translation initiation factor 4 gamma 1	0.324211	-0.422585	NaN	-0.634003	0.372779	NaN	1	1	1	1.2	1.2	1.2	175.49	0	6.5375	6795500	2	Q04637	Q04637
PRDX1	Peroxiredoxin-1	-0.0707748	-0.221737	0.734471	0.377579	-0.151342	0.561285	7	7	6	43.7	43.7	38.2	22.11	0	224.9	416610000	23	Q06830	Q06830
RPL18	60S ribosomal protein L18	NaN	-0.262215	0.560556	NaN	-0.279458	0.355734	2	2	2	13.8	13.8	13.8	21.634	0	12.534	27942000	3	Q07020	Q07020
DHX9	ATP-dependent RNA helicase A	0.417741	-0.201803	0.623776	0.305539	0.663272	0.106131	2	2	2	2	2	2	140.96	0	11.802	24041000	4	Q08211	Q08211
ACACA	Acetyl-CoA carboxylase 1;Biotin carboxylase	0.767394	-0.633504	NaN	-0.604489	-0.212438	NaN	4	4	4	2.6	2.6	2.6	265.55	0	26.826	72419000	6	Q13085;O00763	Q13085
MTAP	S-methyl-5-thioadenosine phosphorylase	0.13652	NaN	0.169618	0.275457	NaN	0.0967537	1	1	1	6	6	6	31.236	0.0043668	6.0626	6308600	2	Q13126	Q13126
HNRNPA0	Heterogeneous nuclear ribonucleoprotein A0	0.10587	0.535557	-0.324172	-0.197167	0.262516	0.0585911	5	5	5	19.3	19.3	19.3	30.84	0	77.592	473070000	17	Q13151	Q13151
CBX3	Chromobox protein homolog 3	0.216972	NaN	0.119672	-0.231506	NaN	-0.434616	1	1	1	3.8	3.8	3.8	20.811	0.0044248	6.0942	189860000	3	Q13185	Q13185
TRIM28	Transcription intermediary factor 1-beta	-0.572446	0.0992115	NaN	-0.000948429	0.2889	NaN	4	4	4	7.7	7.7	7.7	88.549	0	48.448	45162000	7	Q13263	Q13263
G3BP1	Ras GTPase-activating protein-binding protein 1	NaN	-0.123722	0.677671	NaN	0.0622072	0.161469	3	3	3	10.9	10.9	10.9	52.164	0	21.126	33460000	5	Q13283	Q13283
EIF3I	Eukaryotic translation initiation factor 3 subunit I	0.142255	0.308145	-1.49837	-0.0614375	0.077608	0.0452334	5	5	5	19.7	19.7	19.7	36.501	0	48.081	70393000	10	Q13347	Q13347
TCOF1	Treacle protein	NaN	-0.140202	0.00243366	NaN	-0.0537629	0.254779	2	2	2	1.5	1.5	1.5	152.1	0	11.462	7591400	2	Q13428	Q13428
TUBB3	Tubulin beta-3 chain	0.139319	-0.0258175	NaN	-0.207456	-0.228287	NaN	7	1	1	20	3.8	3.8	50.432	0	7.2887	19542000	4	Q13509	Q13509
DDX39B	Spliceosome RNA helicase DDX39B	0.353314	-0.317344	0.283233	-0.264901	-0.208555	0.200384	5	5	4	18	18	10.5	48.991	0	103.68	61052000	6	Q13838;O00148	Q13838
HNRNPD	Heterogeneous nuclear ribonucleoprotein D0	0.0815465	0.054725	0.356219	0.142312	-0.0335153	-0.603597	3	2	2	11	8.7	8.7	38.434	0	12.967	57547000	5	Q14103	Q14103
GANAB	Neutral alpha-glucosidase AB	0.150897	-0.235871	-0.162502	-0.698709	-0.0473422	-0.49077	3	3	3	3.9	3.9	3.9	106.87	0	17.8	23661000	4	Q14697	Q14697
KPNB1	Importin subunit beta-1	-0.170192	-0.218923	-0.459692	0.936721	0.0927705	-0.187058	5	5	5	6.8	6.8	6.8	97.169	0	30.01	92127000	8	Q14974	Q14974
EIF4H	Eukaryotic translation initiation factor 4H	0.0948513	0.188449	NaN	0.327574	0.169417	NaN	3	3	3	11.7	11.7	11.7	27.385	0	17.067	42529000	4	Q15056	Q15056
PDIA6	Protein disulfide-isomerase A6	-0.523715	-0.545643	NaN	0.337371	0.40522	NaN	1	1	1	2.3	2.3	2.3	48.121	0	288.73	72444000	2	Q15084	Q15084
PTGES3	Prostaglandin E synthase 3	0.0478727	0.532183	-0.325483	-0.18734	0.155302	-0.32761	4	4	4	24.4	24.4	24.4	18.697	0	24.429	128130000	7	Q15185	Q15185
NONO	Non-POU domain-containing octamer-binding protein	-0.194625	-0.284819	-0.282535	0.147288	-0.116414	0.102754	3	3	3	8.3	8.3	8.3	54.231	0	19.417	85230000	10	Q15233	Q15233
PCBP1	Poly(rC)-binding protein 1	0.0486658	0.513119	NaN	0.10705	-0.0312998	NaN	2	1	1	9.3	3.7	3.7	37.497	0	6.4238	6997400	2	Q15365	Q15365
PCBP2;PCBP3	Poly(rC)-binding protein 2;Poly(rC)-binding protein 3	0.0155267	NaN	0.371349	-0.811154	NaN	0.0933216	4	4	3	17.3	17.3	11.8	38.58	0	70.556	52554000	8	Q15366;P57721	Q15366;P57721
MAPRE1	Microtubule-associated protein RP/EB family member 1	0.341158	0.409735	0.444223	-0.421238	-0.0422708	-0.443551	3	3	3	20.1	20.1	20.1	29.999	0	21.309	47085000	7	Q15691	Q15691
UBE2V2	Ubiquitin-conjugating enzyme E2 variant 2	0.364491	0.260759	NaN	-0.392369	0.046386	NaN	2	2	1	10.3	10.3	4.8	16.363	0	11.641	65157000	4	Q15819	Q15819
ZYX	Zyxin	-0.433848	0.268107	-1.10298	0.517719	0.337382	-0.153007	1	1	1	2.6	2.6	2.6	61.277	0	6.7245	11707000	4	Q15942	Q15942
ADRM1	Proteasomal ubiquitin receptor ADRM1	NaN	-0.253483	-0.154122	NaN	-0.618629	-0.305249	2	2	2	6.1	6.1	6.1	42.153	0	11.827	10730000	3	Q16186	Q16186
CSRP2	Cysteine and glycine-rich protein 2	-0.344245	0.173495	NaN	0.38067	0.463753	NaN	1	1	1	10.9	10.9	10.9	20.954	0	7.0804	9081700	2	Q16527	Q16527
AARS2	Alanine--tRNA ligase, mitochondrial	NaN	0.127415	-0.0370239	NaN	-0.21706	-0.0714628	1	1	1	0.9	0.9	0.9	107.34	0.0044346	6.0953	6196100	2	Q5JTZ9	Q5JTZ9
KPRP	Keratinocyte proline-rich protein	-0.371943	-0.0975475	-0.335715	1.29736	-0.433718	0.169261	4	4	4	8.1	8.1	8.1	64.135	0	95.135	448290000	9	Q5T749	Q5T749
XP32	Skin-specific protein 32	-0.383948	-0.121855	0.25215	2.21254	-0.823347	0.62338	3	3	3	12	12	12	26.238	0	17.96	35675000	5	Q5T750	Q5T750
RALGAPA1	Ral GTPase-activating protein subunit alpha-1	-0.137752	0.193389	-0.250629	-0.0439706	-0.106464	0.33776	1	1	1	0.3	0.3	0.3	229.83	0	14.268	448770000	5	Q6GYQ0	Q6GYQ0
NCEH1	Neutral cholesterol ester hydrolase 1	-1.53608	-3.08686	NaN	0.833591	1.89458	NaN	2	2	2	7.1	7.1	7.1	45.807	0	13.502	26312000	6	Q6PIU2	Q6PIU2
TUBA1C;TUBA1A;TUBA3E;TUBA8	Tubulin alpha-1C chain;Tubulin alpha-1A chain;Tubulin alpha-3E chain;Tubulin alpha-8 chain	-0.356738	0.097837	NaN	0.501238	0.0738648	NaN	12	1	1	36.3	2.9	2.9	49.895	0	6.2094	20614000	3	Q9BQE3;Q71U36;P0DPH8;P0DPH7;Q6PEY2;Q9NY65;A6NHL2	Q9BQE3;Q71U36;P0DPH8;P0DPH7;Q6PEY2;Q9NY65
PLD3	Phospholipase D3	-1.48834	-2.11366	-1.05167	1.02522	1.71588	1.40093	4	4	4	11.4	11.4	11.4	54.705	0	208.32	413810000	23	Q8IV08	Q8IV08
SRRM1	Serine/arginine repetitive matrix protein 1	-0.196912	-0.451035	0.737511	-0.0402112	-0.423285	-0.037694	1	1	1	1.1	1.1	1.1	102.33	0.006383	6.0078	18669000	3	Q8IYB3	Q8IYB3
HIST3H2BB	Histone H2B type 3-B	-0.0547462	-1.11593	0.754594	0.201048	-0.53207	0.562517	9	3	1	55.6	13.5	5.6	13.908	0	20.482	215430000	9	Q8N257;A0A2R8Y619	Q8N257
ZNF645	E3 ubiquitin-protein ligase ZNF645	NaN	-0.198481	0.899671	NaN	-0.515179	-0.141165	1	1	1	4.2	4.2	4.2	48.784	0.0065076	6.0467	84987000	2	Q8N7E2	Q8N7E2
SERBP1	Plasminogen activator inhibitor 1 RNA-binding protein	0.251681	0.0978021	0.622439	-0.118427	-0.213931	-0.10123	6	6	6	14.7	14.7	14.7	44.965	0	54.457	281120000	18	Q8NC51	Q8NC51
LPCAT1	Lysophosphatidylcholine acyltransferase 1	0.489452	0.624343	NaN	-0.28726	0.0393192	NaN	1	1	1	2.4	2.4	2.4	59.151	0	7.9967	8555700	2	Q8NF37	Q8NF37
H1FX	Histone H1x	0.179548	-0.362142	0.510101	0.37505	-0.112462	0.0462205	4	4	3	21.1	21.1	12.7	22.487	0	23.724	89713000	8	Q92522	Q92522
UFD1L	Ubiquitin fusion degradation protein 1 homolog	0.197249	0.518029	-0.419857	-0.0716064	0.0940548	-0.275533	1	1	1	3.3	3.3	3.3	34.5	0	6.3609	29454000	3	Q92890	Q92890
KHSRP	Far upstream element-binding protein 2	-0.0618956	-0.133117	-0.214564	-0.0752975	-0.139563	0.13109	6	6	5	11.8	11.8	10.5	73.114	0	46.953	105100000	15	Q92945;Q96I24	Q92945
LRRC59	Leucine-rich repeat-containing protein 59	0.0524886	6.71744e-05	0.34342	-0.216629	-0.119983	-0.05795	6	6	6	23.1	23.1	23.1	34.93	0	36.846	185680000	12	Q96AG4	Q96AG4
HMCN1	Hemicentin-1	0.139354	0.306576	1.13049	-0.195355	-0.491378	-0.183039	2	2	2	0.6	0.6	0.6	613.38	0	11.686	101360000000	24	Q96RW7	Q96RW7
PARK7	Protein deglycase DJ-1	0.31521	0.690433	-0.0188124	-0.413694	-0.223334	-0.45532	6	6	6	40.7	40.7	40.7	19.891	0	44.513	124040000	12	Q99497	Q99497
CCT7	T-complex protein 1 subunit eta	0.116042	0.203867	NaN	-0.167751	-0.319318	NaN	4	4	4	10.1	10.1	10.1	59.366	0	25.995	35088000	6	Q99832	Q99832
PRMT1	Protein arginine N-methyltransferase 1	0.0705568	0.0828114	NaN	-0.159446	0.291435	NaN	4	4	4	14.3	14.3	14.3	42.461	0	25.445	55393000	5	Q99873	Q99873
HIST1H2BL;HIST1H2BA	Histone H2B type 1-L;Histone H2B type 1-A	-0.0648301	-0.864541	0.752276	0.309964	-0.552717	0.538132	9	9	0	55.6	55.6	0	13.952	0	212.84	9110700000	57	Q99880;Q96A08	Q99880;Q96A08
PAIP2	Polyadenylate-binding protein-interacting protein 2	0.730128	NaN	-3.2442	-0.843423	NaN	-1.63495	1	1	1	6.3	6.3	6.3	14.984	0.0064103	6.0128	145800000	4	Q9BPZ3	Q9BPZ3
ELAC2	Zinc phosphodiesterase ELAC protein 2	-0.0425373	-0.28533	-0.145732	-0.0408816	-0.0303335	-0.0740612	1	1	1	1.1	1.1	1.1	92.218	0	7.3301	39765000	3	Q9BQ52	Q9BQ52
C19orf43	Uncharacterized protein C19orf43	0.590022	0.0227491	NaN	-0.464883	-0.559542	NaN	3	3	3	30.1	30.1	30.1	18.419	0	225.82	82475000	4	Q9BQ61	Q9BQ61
ACAT2	Acetyl-CoA acetyltransferase, cytosolic	0.590649	0.268001	-0.920486	-0.303985	-0.254157	0.289786	4	4	3	18.1	18.1	14.4	41.35	0	26.206	16702000	4	Q9BWD1	Q9BWD1
RBM4	RNA-binding protein 4	0.174002	NaN	0.694669	-0.0158279	NaN	-0.0567589	2	2	2	6	6	6	40.313	0	11.174	8631800	2	Q9BWF3	Q9BWF3
HINT2	Histidine triad nucleotide-binding protein 2, mitochondrial	-0.110078	-0.308814	0.465682	0.804119	0.873462	-0.00616014	1	1	1	9.2	9.2	9.2	17.162	0	6.5828	16166000	3	Q9BX68	Q9BX68
RAB1B;RAB1C	Ras-related protein Rab-1B;Putative Ras-related protein Rab-1C	-0.081427	0.917806	-0.453711	-0.15714	0.402889	-0.503383	3	3	3	14.9	14.9	14.9	22.171	0	18.402	35966000	9	Q9H0U4;Q92928;P62820;Q92930;P61006;P61026;P51153;P59190	Q9H0U4;Q92928
BCL11A	B-cell lymphoma/leukemia 11A	0.134932	0.219268	1.11534	-0.189863	-0.468497	-0.149575	1	1	1	1.9	1.9	1.9	91.196	0	8.5196	12131000000	238	Q9H165	Q9H165
SH3BGRL3	SH3 domain-binding glutamic acid-rich-like protein 3	NaN	0.394641	0.238389	NaN	-0.00412273	-0.577277	1	1	1	7.5	7.5	7.5	10.438	0	14.268	58492000	2	Q9H299	Q9H299
BOLA2	BolA-like protein 2	0.159554	0.38061	-0.203209	0.0468401	0.131246	0.178995	1	1	1	10.5	10.5	10.5	10.116	0.0043956	6.0811	41644000	3	Q9H3K6	Q9H3K6
RNPEP	Aminopeptidase B	-0.016322	NaN	-0.402873	-0.00694156	NaN	-0.0127292	2	2	2	3.8	3.8	3.8	72.595	0	13.145	11587000	3	Q9H4A4	Q9H4A4
RTN4	Reticulon-4	0.264011	NaN	-0.323045	0.414632	NaN	0.257108	3	3	3	2.5	2.5	2.5	129.93	0	18.06	17598000	3	Q9NQC3	Q9NQC3
AASDHPPT	L-aminoadipate-semialdehyde dehydrogenase-phosphopantetheinyl transferase	0.320074	0.402222	NaN	-0.189947	-0.491348	NaN	1	1	1	4.9	4.9	4.9	35.776	0	7.1634	14676000	2	Q9NRN7	Q9NRN7
PHPT1	14 kDa phosphohistidine phosphatase	NaN	0.234404	0.0884038	NaN	0.13743	0.164935	1	1	1	7.2	7.2	7.2	13.832	0	12.21	84718000	3	Q9NRX4	Q9NRX4
RCC2	Protein RCC2	-0.479742	0.217378	0.176738	-0.142784	-0.0590124	0.104827	4	4	4	5.7	5.7	5.7	56.084	0	23.222	40069000	6	Q9P258	Q9P258
ZNF624	Zinc finger protein 624	0.207742	-0.0719506	NaN	-0.104003	-0.346961	NaN	1	1	1	1.6	1.6	1.6	99.928	0.0063966	6.0081	258970000	2	Q9P2J8	Q9P2J8
EIF3K	Eukaryotic translation initiation factor 3 subunit K	-0.0736741	0.938721	-0.639297	0.309315	0.17417	0.284719	3	3	3	16.1	16.1	16.1	25.059	0	18.523	72217000	6	Q9UBQ5	Q9UBQ5
ZBTB47	Zinc finger and BTB domain-containing protein 47	0.279442	-0.129545	NaN	-0.258795	-0.377603	NaN	1	1	1	2	2	2	82.759	1	-2	150180000	2	Q9UFB7	Q9UFB7
CYB5R1	NADH-cytochrome b5 reductase 1	-0.212311	-0.331239	NaN	0.315349	0.377401	NaN	1	1	1	3.3	3.3	3.3	34.094	0	6.4541	5623400	2	Q9UHQ9	Q9UHQ9
PFDN2	Prefoldin subunit 2	0.0994136	NaN	0.637221	-0.251189	NaN	-0.325641	3	3	3	20.1	20.1	20.1	16.648	0	20.345	41017000	3	Q9UHV9	Q9UHV9
ZNF215	Zinc finger protein 215	0.123417	-0.0841531	1.00917	-0.10308	-0.411465	0.16592	1	1	1	2.9	2.9	2.9	60.034	0	18.442	87656000000	24	Q9UL58	Q9UL58
PA2G4	Proliferation-associated protein 2G4	-0.170372	0.378681	-1.15796	-0.0449126	0.141425	-0.399717	3	3	3	10.4	10.4	10.4	43.786	0	18.951	62409000	5	Q9UQ80	Q9UQ80
NIP7	60S ribosome subunit biogenesis protein NIP7 homolog	NaN	0.133743	0.278559	NaN	-0.0510862	-0.380885	1	1	1	5.6	5.6	5.6	20.462	0	6.252	14065000	2	Q9Y221	Q9Y221
PIN4	Peptidyl-prolyl cis-trans isomerase NIMA-interacting 4	0.214999	0.41164	0.430623	0.198526	-0.191758	0.801478	2	2	2	13.7	13.7	13.7	13.81	0	34.868	153960000	5	Q9Y237	Q9Y237
NUDC	Nuclear migration protein nudC	NaN	0.254843	0.150291	NaN	0.179638	0.122694	1	1	1	4.5	4.5	4.5	38.242	0	6.5174	17256000	2	Q9Y266	Q9Y266
LSM4	U6 snRNA-associated Sm-like protein LSm4	NaN	-0.0834886	0.525566	NaN	-0.21175	0.109498	1	1	1	8.6	8.6	8.6	15.35	1	-2	18913000	2	Q9Y4Z0	Q9Y4Z0
PPME1	Protein phosphatase methylesterase 1	-1.77926	-1.75814	-0.649792	1.43281	2.01288	0.985482	3	3	3	14.2	14.2	14.2	42.315	0	19.516	99914000	10	Q9Y570	Q9Y570
PSAT1	Phosphoserine aminotransferase	NaN	-0.151676	-0.299448	NaN	0.0141659	0.102006	2	2	2	5.7	5.7	5.7	40.422	0	11.796	11088000	3	Q9Y617	Q9Y617
CLIC4	Chloride intracellular channel protein 4	-0.161871	NaN	0.0809363	-0.0318632	NaN	0.250198	1	1	1	4.7	4.7	4.7	28.772	0	6.3008	31503000	2	Q9Y696	Q9Y696

## Sheet: Fig. 4H and Fig. 5A data
Identified proteins (in at least 1 of 3 biological replicates) in volcano plots Fig. 4H and Fig. 5A (6Yn-Pro+H2O2+NRH+NMNAT1 overexpression vs DMSO+H2O2+NRH+NMNAT1 overexpression)
Gene names	Protein names	DMSO+NMNAT1 1 (Log2 intensity)	DMSO+NMNAT1 2 (Log2 intensity)	DMSO+NMNAT1 3 (Log2 intensity)	6Yn-Pro+NMNAT1 1 (Log2 intensity)	6Yn-Pro+NMNAT1 2 (Log2 intensity)	6Yn-Pro+NMNAT1 3 (Log2 intensity)	Peptides	Razor + unique peptides	Unique peptides	Sequence coverage [%]	Unique + razor sequence coverage [%]	Unique sequence coverage [%]	Mol. weight [kDa]	Q-value	Score	Intensity	MS/MS count	Protein IDs	Majority protein IDs
C11orf98	Uncharacterized protein C11orf98	-0.208693	0.743802	0.577888	0.492506	-0.578984	0.150603	1	1	1	10.6	10.6	10.6	14.234	0	10.562	30802000	3	E9PRG8	E9PRG8
SMAP	Small acidic protein	-2.01168	NaN	NaN	1.32462	NaN	NaN	1	1	1	12.6	12.6	12.6	20.332	0	7.6976	4847400	2	O00193	O00193
PSMD11	26S proteasome non-ATPase regulatory subunit 11	0.488959	NaN	-0.087457	0.126452	NaN	-0.434716	2	2	2	6.6	6.6	6.6	47.463	0	11.616	9546900	3	O00231	O00231
SUPT5H	Transcription elongation factor SPT5	0.180339	NaN	-0.674723	0.587079	NaN	0.320059	1	1	1	1.7	1.7	1.7	121	0.010204	5.9203	10173000	2	O00267	O00267
CLIC1	Chloride intracellular channel protein 1	-0.546074	0.0460668	-0.399504	1.06086	0.0822805	-0.119124	5	5	5	39.8	39.8	39.8	26.922	0	103.79	202410000	27	O00299	O00299
EIF3F	Eukaryotic translation initiation factor 3 subunit F	-0.92092	NaN	0.442733	0.672645	NaN	0.408237	1	1	1	5	5	5	37.563	0.0025907	6.8458	12498000	2	O00303	O00303
DDX3X;DDX3Y	ATP-dependent RNA helicase DDX3X;ATP-dependent RNA helicase DDX3Y	-0.556428	-0.212712	-0.0558078	0.227405	-0.340168	0.00720651	4	4	3	11.8	11.8	6.6	73.243	0	25.338	53671000	10	O00571;O15523	O00571;O15523
PRMT5	Protein arginine N-methyltransferase 5;Protein arginine N-methyltransferase 5, N-terminally processed	NaN	NaN	0.0132071	NaN	NaN	0.542336	1	1	1	2.7	2.7	2.7	72.683	0.0062893	6.0035	3745400	1	O14744	O14744
PSMA7;PSMA8	Proteasome subunit alpha type-7;Proteasome subunit alpha type-7-like	0.0807858	0.875162	0.0264748	0.684372	-0.161747	-0.581501	2	2	2	11.7	11.7	11.7	27.887	0	12.169	28605000	7	O14818;Q8TAA3	O14818;Q8TAA3
HAT1	Histone acetyltransferase type B catalytic subunit	-0.406674	NaN	NaN	0.32602	NaN	NaN	2	2	2	8.1	8.1	8.1	49.512	0	12.42	8347100	2	O14929	O14929
UQCRQ	Cytochrome b-c1 complex subunit 8	NaN	NaN	-0.885081	NaN	NaN	0.0345542	1	1	1	15.9	15.9	15.9	9.9062	0.0065217	6.0933	2782900	2	O14949	O14949
MYL12A;MYL12B	Myosin regulatory light chain 12A;Myosin regulatory light chain 12B	-0.0909751	0.0267001	-0.42042	-2.43555	-0.256589	-0.131657	4	4	4	28.1	28.1	28.1	19.794	0	25.824	91574000	8	P19105;O14950;P24844	P19105;O14950
XPO1	Exportin-1	0.196448	1.31702	0.452293	0.508568	-0.785267	0.609115	2	2	2	3.5	3.5	3.5	123.38	0	13.819	26313000	5	O14980	O14980
DHX15	Pre-mRNA-splicing factor ATP-dependent RNA helicase DHX15	0.0917835	NaN	1.07276	-1.03774	NaN	1.04019	3	3	3	5.4	5.4	5.4	90.932	0	19.153	36074000	7	O43143	O43143
PHGDH	D-3-phosphoglycerate dehydrogenase	NaN	-0.57532	-0.119022	NaN	0.251997	0.14544	5	5	5	15.8	15.8	15.8	56.65	0	34.085	72082000	12	O43175	O43175
PSMD3	26S proteasome non-ATPase regulatory subunit 3	NaN	NaN	-0.569208	NaN	NaN	-0.726538	1	1	1	3.4	3.4	3.4	60.977	0	7.3217	3140100	1	O43242	O43242
HNRNPR	Heterogeneous nuclear ribonucleoprotein R	NaN	-0.275039	0.100798	NaN	0.643054	-0.000522211	3	3	1	5.8	5.8	2.2	70.942	0	19.703	3617200	2	O43390	O43390
AKR7A2	Aflatoxin B1 aldehyde reductase member 2	NaN	-0.314769	NaN	NaN	-1.08623	NaN	1	1	1	5.3	5.3	5.3	39.589	0.0023923	6.4686	3315000	1	O43488	O43488
ACTN4	Alpha-actinin-4	0.327894	0.281325	0.236517	-0.716097	-0.0288955	-0.13194	10	10	10	15.9	15.9	15.9	104.85	0	67.943	139390000	15	O43707;P12814;Q08043	O43707
SMARCA5	SWI/SNF-related matrix-associated actin-dependent regulator of chromatin subfamily A member 5	0.345174	NaN	NaN	1.59885	NaN	NaN	1	1	1	1.4	1.4	1.4	121.9	0	10.939	4517700	2	O60264	O60264
SYNCRIP	Heterogeneous nuclear ribonucleoprotein Q	0.0500768	NaN	NaN	0.574478	NaN	NaN	3	1	1	5.5	1.8	1.8	69.602	0.010225	5.9286	3782700	1	O60506	O60506
HIST1H2BL;HIST1H2BH;HIST1H2BN;HIST1H2BC;HIST1H2BD;HIST1H2BK;HIST2H2BF;HIST1H2BM;H2BFS	Histone H2B type 1-L;Histone H2B type 1-H;Histone H2B type 1-N;Histone H2B type 1-C/E/F/G/I;Histone H2B type 1-D;Histone H2B type 1-K;Histone H2B type 2-F;Histone H2B type 1-M;Histone H2B type F-S	0.456578	0.659444	0.79233	1.03574	0.744535	0.678536	4	4	2	27	27	7.9	13.952	0	292.24	123800000	12	Q99880;Q93079;Q99877;P62807;P58876;O60814;Q5QNW6;Q99879;P57053;Q96A08;A0A2R8Y619	Q99880;Q93079;Q99877;P62807;P58876;O60814;Q5QNW6;Q99879;P57053
H2AFY	Core histone macro-H2A.1	NaN	NaN	0.0368994	NaN	NaN	0.526732	2	1	1	9.9	5.4	5.4	39.617	0.0026882	6.947	3293900	1	O75367	O75367
FLNB	Filamin-B	NaN	1.05453	NaN	NaN	-0.529541	NaN	2	2	2	1.8	1.8	1.8	278.16	0	13.638	4866700	2	O75369	O75369
CS	Citrate synthase, mitochondrial	-0.181925	-0.287926	-0.209401	-0.738202	-0.120824	-0.183106	2	2	2	4.9	4.9	4.9	51.712	0	17.716	66452000	7	O75390	O75390
PRPF40A	Pre-mRNA-processing factor 40 homolog A	-1.58577	NaN	NaN	1.3626	NaN	NaN	1	1	1	1	1	1	108.8	0.01006	5.8903	23655000	2	O75400	O75400
PAK2;PAK1;PAK3	Serine/threonine-protein kinase PAK 2;PAK-2p27;PAK-2p34;Serine/threonine-protein kinase PAK 1;Serine/threonine-protein kinase PAK 3	NaN	-3.17015	0.498904	NaN	1.21547	0.356589	1	1	1	3.6	3.6	3.6	58.042	0.0023148	6.3065	272520000	4	Q13177;Q13153;O75914	Q13177;Q13153;O75914
HSPH1;HSPA4L	Heat shock protein 105 kDa;Heat shock 70 kDa protein 4L	-0.245532	0.584899	-0.137598	0.1034	-0.547861	-0.0445958	2	1	1	3.3	1.6	1.6	96.864	0	7.8244	15513000	5	Q92598;O95757	Q92598;O95757
LDHA	L-lactate dehydrogenase A chain	0.0821161	0.0990797	-0.0465094	-0.765314	-0.0383935	-0.033831	6	6	6	19	19	19	36.688	0	41.436	87768000	14	P00338	P00338
PGK1	Phosphoglycerate kinase 1	-0.0712288	0.260275	0.0957556	0.312801	-0.0773325	-0.390836	5	5	5	18.9	18.9	18.9	44.614	0	52.998	567440000	24	P00558;P07205	P00558
PLAU	Urokinase-type plasminogen activator;Urokinase-type plasminogen activator long chain A;Urokinase-type plasminogen activator short chain A;Urokinase-type plasminogen activator chain B	0.652732	-0.0150964	0.958657	-1.25052	0.298125	0.296018	1	1	1	2.3	2.3	2.3	48.507	0.010101	5.9	4459600000	4	P00749	P00749
ALDOA	Fructose-bisphosphate aldolase A	0.0313193	-0.563122	-0.213184	-0.0694487	0.122327	0.0045604	11	11	11	48.4	48.4	48.4	39.42	0	140.14	407620000	46	P04075;P09972;P05062	P04075
CSTB	Cystatin-B	-0.688732	NaN	NaN	0.417488	NaN	NaN	1	1	1	24.5	24.5	24.5	11.139	0	11.442	14416000	1	P04080	P04080
OAT	Ornithine aminotransferase, mitochondrial;Ornithine aminotransferase, hepatic form;Ornithine aminotransferase, renal form	NaN	NaN	-0.263186	NaN	NaN	0.153329	1	1	1	3.6	3.6	3.6	48.534	0.0027624	7.0542	13836000	4	P04181	P04181
GAPDH	Glyceraldehyde-3-phosphate dehydrogenase	-0.156371	-0.0319507	-0.303976	0.197884	-0.113017	-0.089192	13	13	13	46.3	46.3	46.3	36.053	0	179.01	849720000	111	P04406	P04406
SLC25A5;SLC25A31	ADP/ATP translocase 2;ADP/ATP translocase 2, N-terminally processed;ADP/ATP translocase 4;ADP/ATP translocase 4, N-terminally processed	0.388902	NaN	0.0429446	0.472735	NaN	0.195594	2	1	1	8.4	4.4	4.4	32.852	0	10.997	5259600	3	P05141;Q9H0C2	P05141;Q9H0C2
PCCA	Propionyl-CoA carboxylase alpha chain, mitochondrial	0.142935	-1.89187	-0.127308	-1.83308	0.1751	-0.282008	10	10	10	19.2	19.2	19.2	80.058	0	76.999	252160000	30	P05165	P05165
RPLP0;RPLP0P6	60S acidic ribosomal protein P0;60S acidic ribosomal protein P0-like	-0.637186	0.730594	0.500237	0.963431	-0.863985	0.270687	3	3	3	15.5	15.5	15.5	34.273	0	20.949	22256000	5	P05388;Q8NHW5	P05388;Q8NHW5
SSB	Lupus La protein	0.954973	NaN	NaN	-1.14891	NaN	NaN	1	1	1	4.7	4.7	4.7	46.836	0	7.302	3097100	1	P05455	P05455
CDK1	Cyclin-dependent kinase 1	-1.00077	NaN	0.494481	1.16566	NaN	-0.317517	1	1	1	5.4	5.4	5.4	34.095	0.0026738	6.9324	46480000	2	P06493	P06493
ENO1	Alpha-enolase	0.538694	-0.117396	0.0710073	-1.03931	0.730663	0.0338256	17	17	17	44.9	44.9	44.9	47.168	0	244.56	910150000	72	P06733;P13929;P09104	P06733
GPI	Glucose-6-phosphate isomerase	-0.0302202	0.273917	0.248814	0.334199	-0.193731	0.119751	6	6	6	19	19	19	63.146	0	146.72	197030000	27	P06744;CON__Q3ZBD7	P06744
NPM1	Nucleophosmin	-0.118165	-0.296978	-0.137828	-0.423953	0.484533	0.0514197	5	5	5	29.6	29.6	29.6	32.575	0	61.922	107440000	18	P06748	P06748
HIST1H2BB;HIST2H2BE;HIST1H2BO;HIST3H2BB;HIST1H2BJ;HIST2H2BD;HIST2H2BC	Histone H2B type 1-B;Histone H2B type 2-E;Histone H2B type 1-O;Histone H2B type 3-B;Histone H2B type 1-J;Putative histone H2B type 2-D;Putative histone H2B type 2-C	0.161891	0.924048	NaN	0.420155	1.12856	NaN	4	2	2	27	7.9	7.9	13.95	0	15.546	10047000	3	P33778;Q16778;P23527;Q8N257;P06899;Q6DRA6;Q6DN03	P33778;Q16778;P23527;Q8N257;P06899;Q6DRA6;Q6DN03
LDHB	L-lactate dehydrogenase B chain	-0.0154669	-0.01756	-0.111764	-0.414783	-0.00425259	0.0815599	10	10	10	36.8	36.8	36.8	36.638	0	192.81	533140000	37	P07195	P07195
ANXA2	Annexin A2	-0.0547119	NaN	-0.852861	0.0265303	NaN	1.10562	2	2	2	5.3	5.3	5.3	38.604	0	22.638	40845000	7	P07355	P07355
TUBB	Tubulin beta chain	-0.0649382	0.107931	0.0639545	-0.0833449	-0.276308	-0.070149	11	11	4	36.5	36.5	16	49.67	0	114.39	310000000	41	P07437;Q9BVA1;Q13885;Q9BUF5	P07437
HEXB	Beta-hexosaminidase subunit beta;Beta-hexosaminidase subunit beta chain B;Beta-hexosaminidase subunit beta chain A	NaN	0.324306	-0.623092	NaN	0.125218	0.453862	1	1	1	2.7	2.7	2.7	63.111	0	13.374	7173800	2	P07686	P07686
PFN1	Profilin-1	-0.316751	-0.361124	0.0604726	-0.134571	-0.127263	-0.0566345	7	7	5	69.3	69.3	42.9	15.054	0	70.264	1178000000	60	P07737;CON__P02584	P07737
CTSB	Cathepsin B;Cathepsin B light chain;Cathepsin B heavy chain	NaN	-0.509183	-1.19569	NaN	0.789297	0.868137	1	1	1	5	5	5	37.821	0	7.6336	35427000	5	P07858	P07858
HSP90AA1	Heat shock protein HSP 90-alpha	0.0355062	0	-0.155603	-0.43265	-0.0453579	0.0358426	25	25	15	38.4	38.4	23.9	84.659	0	323.31	972070000	71	P07900;Q14568;Q58FG0;Q58FG1;Q58FF6	P07900
HNRNPC;HNRNPCL1;HNRNPCL3;HNRNPCL2;HNRNPCL4	Heterogeneous nuclear ribonucleoproteins C1/C2;Heterogeneous nuclear ribonucleoprotein C-like 1;Heterogeneous nuclear ribonucleoprotein C-like 3;Heterogeneous nuclear ribonucleoprotein C-like 2;Heterogeneous nuclear ribonucleoprotein C-like 4	NaN	-0.344163	-0.303109	NaN	-0.416341	-0.0558177	5	5	5	16.3	16.3	16.3	33.67	0	31.63	457580000	14	P07910;O60812;B7ZW38;B2RXH8;P0DMR1;A0A0G2JPF8;A0A0G2JNQ3	P07910;O60812;B7ZW38;B2RXH8;P0DMR1;A0A0G2JPF8;A0A0G2JNQ3
HSP90AB1	Heat shock protein HSP 90-beta	-0.127087	-0.173338	-0.127374	-0.321554	-0.157619	0.0120793	23	13	11	35.9	23.2	21.3	83.263	0	323.31	929770000	50	P08238;Q58FF7;Q58FF8	P08238
SNRNP70	U1 small nuclear ribonucleoprotein 70 kDa	-0.187465	0.00198185	0.293776	0.702791	0.0580139	0.0256771	7	7	7	27.2	27.2	27.2	51.556	0	77.424	281350000	29	P08621	P08621
VIM	Vimentin	-0.173694	-0.97219	-0.574795	-0.853212	0.00913652	-0.114188	22	22	22	54.3	54.3	54.3	53.651	0	323.31	3908400000	110	P08670;P17661;P41219;P12036;P07197;P07196;Q16352	P08670
RPS17	40S ribosomal protein S17	-0.107817	NaN	-0.256046	-0.0231532	NaN	-1.42074	2	2	2	25.2	25.2	25.2	15.55	0	14.981	8907000	3	P08708	P08708
ANXA5	Annexin A5	NaN	-0.130075	-0.390631	NaN	-0.0375988	-0.32159	7	7	7	26.2	26.2	26.2	35.936	0	114.29	229520000	21	P08758	P08758
GSTP1	Glutathione S-transferase P	NaN	NaN	-0.935365	NaN	NaN	0.992447	1	1	1	9	9	9	23.356	0.0045147	6.2178	2874100	1	P09211	P09211
HMGB1	High mobility group protein B1	NaN	NaN	-0.988333	NaN	NaN	0.0599212	3	3	3	17.7	17.7	17.7	24.893	0	23.722	33020000	7	P09429;P26583;B2RPK0	P09429
HNRNPA1;HNRNPA1L2	Heterogeneous nuclear ribonucleoprotein A1;Heterogeneous nuclear ribonucleoprotein A1, N-terminally processed;Heterogeneous nuclear ribonucleoprotein A1-like 2	NaN	NaN	-0.75777	NaN	NaN	-0.0902895	2	2	2	8.6	8.6	8.6	38.746	0	14.078	7750600	2	P09651;Q32P51	P09651;Q32P51
PARP1	Poly [ADP-ribose] polymerase 1	-1.05267	-3.92332	-1.29126	0.741801	2.5222	2.00877	20	20	20	23.6	23.6	23.6	113.08	0	260.98	856120000	77	P09874	P09874
UCHL1	Ubiquitin carboxyl-terminal hydrolase isozyme L1	NaN	NaN	0.0999993	NaN	NaN	0.015358	2	2	2	17.5	17.5	17.5	24.824	0	15.147	13180000	4	P09936	P09936
HIST2H2AA3;HIST1H2AG;HIST1H2AJ;H2AFJ;HIST2H2AC;HIST1H2AH;HIST1H2AD;HIST1H2AC;HIST3H2A;HIST1H2AB;H2AFX;HIST1H2AA	Histone H2A type 2-A;Histone H2A type 1;Histone H2A type 1-J;Histone H2A.J;Histone H2A type 2-C;Histone H2A type 1-H;Histone H2A type 1-D;Histone H2A type 1-C;Histone H2A type 3;Histone H2A type 1-B/E;Histone H2AX;Histone H2A type 1-A	0.0236131	2.05079	0.0876007	0.867865	-0.218268	0.19129	4	4	3	35.4	35.4	28.5	14.095	0	36.85	190230000	25	Q6FI13;P0C0S8;Q99878;Q9BTM1;Q16777;Q96KK5;P20671;Q93077;Q7L7L0;P04908;P16104;Q96QV6	Q6FI13;P0C0S8;Q99878;Q9BTM1;Q16777;Q96KK5;P20671;Q93077;Q7L7L0;P04908;P16104;Q96QV6
HSPA1A;HSPA1B	Heat shock 70 kDa protein 1A;Heat shock 70 kDa protein 1B	0	-0.259678	-0.0991244	-0.300233	-0.115107	-0.110077	18	18	13	39.2	39.2	30.3	70.051	0	323.31	1155900000	72	P0DMV8;P0DMV9;P34931	P0DMV8;P0DMV9
HIST1H1E	Histone H1.4	NaN	-1.94688	NaN	NaN	0.868737	NaN	5	1	1	22.4	9.1	9.1	21.865	0	9.1616	6733900	1	P10412	P10412
HSPD1	60 kDa heat shock protein, mitochondrial	-0.020637	-0.506982	-0.179046	-0.306254	-0.0620546	-0.143916	11	11	11	28.6	28.6	28.6	61.054	0	297.79	994130000	50	P10809	P10809
HSPA5	78 kDa glucose-regulated protein	0.0207359	0.0782807	0.11231	-0.480946	-0.0329541	0.379491	3	3	3	7.8	7.8	7.8	72.332	0	21.551	37956000	11	P11021	P11021
ACP2	Lysosomal acid phosphatase	NaN	-1.6134	-1.33548	NaN	0.649394	0.667548	2	2	2	8.3	8.3	8.3	48.344	0	14.876	21845000	3	P11117	P11117
HSPA8	Heat shock cognate 71 kDa protein	0.136158	-0.127338	-0.244159	-0.371404	0.137237	-0.0644961	11	10	10	22.6	20.6	20.6	70.897	0	121.55	389210000	29	P11142;P54652	P11142
PC	Pyruvate carboxylase, mitochondrial	0.305899	0.285704	0.304222	-1.10536	0.00822481	-0.0318287	8	8	8	9.4	9.4	9.4	129.63	0	61.176	131620000	24	P11498	P11498
MTHFD1	C-1-tetrahydrofolate synthase, cytoplasmic;Methylenetetrahydrofolate dehydrogenase;Methenyltetrahydrofolate cyclohydrolase;Formyltetrahydrofolate synthetase;C-1-tetrahydrofolate synthase, cytoplasmic, N-terminally processed	NaN	NaN	0.326724	NaN	NaN	-0.135555	3	3	3	5	5	5	101.56	0	20.02	11049000	5	P11586	P11586
PABPC1	Polyadenylate-binding protein 1	-0.168109	0.138994	0.300787	0.185168	0.536085	0.233593	1	1	1	2.4	2.4	2.4	70.67	0	14.171	18551000	6	P11940	P11940
PCNA	Proliferating cell nuclear antigen	0.153389	-0.662547	-0.998906	-1.19463	0.0503232	0.0495269	2	2	2	13	13	13	28.768	0	14.769	30476000	6	P12004	P12004
HARS	Histidine--tRNA ligase, cytoplasmic	-0.43474	NaN	NaN	-0.781235	NaN	NaN	1	1	1	2.4	2.4	2.4	57.41	0.0065359	6.1067	8520000	2	P12081	P12081
IMPDH2	Inosine-5-monophosphate dehydrogenase 2	NaN	NaN	0.312565	NaN	NaN	-0.403322	2	2	2	6.2	6.2	6.2	55.804	0	14.844	3561600	2	P12268	P12268
CKB	Creatine kinase B-type	0.198486	0.0315067	-0.00968234	0.140126	-0.0038023	8.25673e-05	13	13	13	50.7	50.7	50.7	42.644	0	315.33	1670600000	88	P12277	P12277
XRCC6	X-ray repair cross-complementing protein 6	-0.208757	-0.115881	0.0637512	-0.162011	-0.305426	-0.0274751	7	7	7	17.9	17.9	17.9	69.842	0	66.418	210120000	26	P12956	P12956
XRCC5	X-ray repair cross-complementing protein 5	-0.139789	-0.0314407	-0.350756	0.0849872	-0.102571	-0.0696318	6	6	6	11.3	11.3	11.3	82.704	0	61.156	203360000	14	P13010	P13010
EEF2	Elongation factor 2	0.00238625	-0.639988	-0.175451	-0.256402	0.11028	-0.106393	14	14	14	23.7	23.7	23.7	95.337	0	260.47	1189800000	78	P13639	P13639
MIF	Macrophage migration inhibitory factor	-1.37393	-1.69177	0.261681	1.26066	0.601442	0.47438	2	2	2	26.1	26.1	26.1	12.476	0	14.332	124560000	25	P14174	P14174
FDPS	Farnesyl pyrophosphate synthase	-0.246548	NaN	NaN	1.26086	NaN	NaN	1	1	1	4.3	4.3	4.3	48.275	0.0027248	6.9926	13174000	2	P14324	P14324
PKM	Pyruvate kinase PKM	0.0576321	-0.508125	-0.260094	-1.01315	0.0349857	-0.0916008	16	16	15	53.3	53.3	47.5	57.936	0	285.53	1038800000	54	P14618;P30613	P14618
HSP90B1	Endoplasmin	-0.467683	-0.790339	-0.314982	-0.525703	-0.113487	-0.151208	17	15	15	25.9	24.2	24.2	92.468	0	323.31	661520000	62	P14625	P14625
SNRPB;SNRPN	Small nuclear ribonucleoprotein-associated proteins B and B;Small nuclear ribonucleoprotein-associated protein N	0.10487	NaN	-0.606704	0.1152	NaN	0.319951	2	2	2	14.6	14.6	14.6	24.61	0	15.124	21031000	4	P14678;P63162	P14678;P63162
HNRNPL	Heterogeneous nuclear ribonucleoprotein L	NaN	-0.0419574	-0.414901	NaN	-0.265658	-0.00652687	7	7	7	25	25	25	64.132	0	46.416	69925000	10	P14866	P14866
DARS	Aspartate--tRNA ligase, cytoplasmic	-0.116833	1.1309	NaN	0.776889	-0.256821	NaN	2	2	2	5.6	5.6	5.6	57.136	0	13.115	59747000	5	P14868	P14868
AKR1B1	Aldose reductase	NaN	-0.97974	-0.0128328	NaN	0.638856	0.0987101	3	3	3	10.4	10.4	10.4	35.853	0	19.042	26375000	6	P15121	P15121
NME2;NME1;NME2P1	Nucleoside diphosphate kinase B;Nucleoside diphosphate kinase A;Putative nucleoside diphosphate kinase	-0.0507277	0.298586	-0.398444	-0.455654	-0.165957	-0.0481625	3	3	3	22.4	22.4	22.4	17.298	0	19.316	48427000	5	P22392;P15531;O60361	P22392;P15531;O60361
RPS2	40S ribosomal protein S2	0.162457	0.0910022	-0.045809	0.114624	0.108298	-0.0397577	3	3	3	10.2	10.2	10.2	31.324	0	24.507	89046000	16	P15880	P15880
CBR1;CBR3	Carbonyl reductase [NADPH] 1;Carbonyl reductase [NADPH] 3	NaN	NaN	0.301868	NaN	NaN	0.603018	2	2	2	11.9	11.9	11.9	30.375	0	12.798	12010000	5	P16152;O75828	P16152;O75828
HIST1H1C;HIST1H1D;HIST1H1A;HIST1H1T	Histone H1.2;Histone H1.3;Histone H1.1;Histone H1t	0.152412	0.646609	-0.349259	1.11984	0.94867	0.530537	5	5	1	23	23	9.4	21.364	0	63.604	34070000	3	P16403;P16402;Q02539;P22492	P16403;P16402;Q02539;P22492
PCSK2	Neuroendocrine convertase 2	NaN	NaN	1.16068	NaN	NaN	0.150975	1	1	1	1.6	1.6	1.6	70.564	1	-2	1001600000	2	P16519	P16519
HSPA6;HSPA7	Heat shock 70 kDa protein 6;Putative heat shock 70 kDa protein 7	-0.357313	0.355663	-0.197342	0.651782	-0.291808	-0.135271	6	1	1	10.6	1.7	1.7	71.027	0	20.37	23756000	6	P17066;P48741	P17066;P48741
UBTF	Nucleolar transcription factor 1	-0.0351866	0.710731	0.654091	0.460952	-0.25082	0.251286	1	1	1	2.1	2.1	2.1	89.405	0.0026385	6.8972	12302000	4	P17480	P17480
CAPN2	Calpain-2 catalytic subunit	NaN	NaN	-0.000554562	NaN	NaN	0.367556	1	1	1	2.6	2.6	2.6	79.994	0.0066079	6.1448	3533800	1	P17655	P17655
CTPS1	CTP synthase 1	NaN	-0.0814133	NaN	NaN	-0.273261	NaN	1	1	1	3	3	3	66.69	0.0027855	7.1091	21210000	4	P17812	P17812
DDX5	Probable ATP-dependent RNA helicase DDX5	-0.137633	NaN	NaN	0.847641	NaN	NaN	2	1	1	7.2	5.4	5.4	69.147	0	9.6082	7146800	1	P17844	P17844
PFKL	ATP-dependent 6-phosphofructokinase, liver type	NaN	NaN	-0.181182	NaN	NaN	0.502959	1	1	1	2.3	2.3	2.3	85.018	0.006383	6.0261	1291800	1	P17858	P17858
TCP1	T-complex protein 1 subunit alpha	0.261097	0.114584	-0.149435	0.992096	0.286092	-0.426306	2	2	2	7.7	7.7	7.7	60.343	0	15.305	35543000	8	P17987	P17987
RPL35A	60S ribosomal protein L35a	NaN	-0.0968965	0.0807503	NaN	0.0187068	-0.158694	1	1	1	9.1	9.1	9.1	12.538	0.0064655	6.0586	23456000	2	P18077	P18077
RPL7	60S ribosomal protein L7	-0.352232	1.46477	0.548337	1.45415	-0.299958	0.0103077	4	4	4	19.4	19.4	19.4	29.225	0	27.124	62023000	10	P18124	P18124
RPL17	60S ribosomal protein L17	NaN	2.52145	NaN	NaN	-1.21719	NaN	1	1	1	7.6	7.6	7.6	21.397	0.0026667	6.9274	9549400	1	P18621	P18621
PGAM1;PGAM2;PGAM4	Phosphoglycerate mutase 1;Phosphoglycerate mutase 2;Probable phosphoglycerate mutase 4	0.419906	-2.2289	-0.0129064	0.662061	0.924224	-0.0336619	2	2	2	13	13	13	28.804	0	22.282	22606000	7	P18669;P15259;Q8N0Y7	P18669;P15259;Q8N0Y7
NCL	Nucleolin	-0.0923268	-0.148926	-0.120644	-0.0266776	-0.137999	-0.144644	9	9	9	16.2	16.2	16.2	76.613	0	197.8	323150000	33	P19338	P19338
M6PR	Cation-dependent mannose-6-phosphate receptor	0.71314	-0.0321505	NaN	-2.30476	0.16013	NaN	1	1	1	7.6	7.6	7.6	30.993	0	8.3814	22099000	3	P20645	P20645
LMNB1;LMNB2	Lamin-B1;Lamin-B2	-0.12987	-0.31503	-1.31251	-1.1142	0.125706	0.45677	2	2	2	4.4	4.4	4.4	66.408	0	11.951	9958300	3	P20700;Q03252	P20700;Q03252
FLNA	Filamin-A	0.157602	-0.129488	0.115516	-0.101166	-0.043674	0.0362678	34	34	34	21.9	21.9	21.9	280.74	0	323.31	708300000	101	P21333	P21333
GART	Trifunctional purine biosynthetic protein adenosine-3;Phosphoribosylamine--glycine ligase;Phosphoribosylformylglycinamidine cyclo-ligase;Phosphoribosylglycinamide formyltransferase	NaN	NaN	-0.638711	NaN	NaN	-0.332469	1	1	1	2.1	2.1	2.1	107.77	0.0024155	6.5065	1567500	1	P22102	P22102
UBA1	Ubiquitin-like modifier-activating enzyme 1	-0.173773	0.145762	-0.0629811	0.104509	-0.0786438	-0.0579589	14	14	14	18.1	18.1	18.1	117.85	0	135.78	440170000	53	P22314	P22314
HNRNPA2B1	Heterogeneous nuclear ribonucleoproteins A2/B1	-0.449507	-0.331001	-0.0734048	-0.0538286	0.192307	-0.131702	7	7	7	28	28	28	37.429	0	78.711	157250000	22	P22626	P22626
UQCRC2	Cytochrome b-c1 complex subunit 2, mitochondrial	0.383186	NaN	NaN	0.259256	NaN	NaN	1	1	1	3.1	3.1	3.1	48.442	0.0024272	6.5768	2317300	1	P22695	P22695
SFPQ	Splicing factor, proline- and glutamine-rich	0.237911	-1.00125	-0.306695	-1.40933	0.475414	0.207984	3	3	3	7.1	7.1	7.1	76.149	0	27.877	46001000	7	P23246	P23246
PPIB	Peptidyl-prolyl cis-trans isomerase B	-0.588837	NaN	NaN	1.07118	NaN	NaN	2	2	2	11.6	11.6	11.6	23.742	0	14.668	17994000	3	P23284	P23284
RPS3	40S ribosomal protein S3	-0.288214	-0.0213158	-0.421949	0.601354	-0.0149616	-0.0545711	3	3	3	19.8	19.8	19.8	26.688	0	24.866	57213000	8	P23396	P23396
AHCY	Adenosylhomocysteinase	0.449617	-1.45804	-0.246451	-1.3837	0.170727	-0.0173903	2	2	2	6.5	6.5	6.5	47.716	0	44.75	136010000	12	P23526	P23526
EEF1B2	Elongation factor 1-beta	NaN	NaN	0.440734	NaN	NaN	-0.226543	2	2	2	12.4	12.4	12.4	24.763	0	11.667	10368000	2	P24534	P24534
ATP5F1	ATP synthase F(0) complex subunit B1, mitochondrial	NaN	NaN	0.0907138	NaN	NaN	0.100346	1	1	1	5.9	5.9	5.9	28.908	0.0026525	6.9065	9484100	2	P24539	P24539
MCM3	DNA replication licensing factor MCM3	0.669403	-0.322733	0.543733	-0.599147	0.0642699	0.35284	2	2	2	4	4	4	90.98	0	34.436	95530000	10	P25205	P25205
ATP5A1	ATP synthase subunit alpha, mitochondrial	-0.170333	0.493163	-0.601548	0.604034	-0.0658611	0.00775425	3	3	3	8	8	8	59.75	0	38.818	110700000	13	P25705	P25705
PSMA1	Proteasome subunit alpha type-1	-0.399488	1.37425	-0.873589	0.178591	-0.37941	0.258655	3	3	3	11.4	11.4	11.4	29.555	0	17.67	7334700	3	P25786	P25786
PSMA3	Proteasome subunit alpha type-3	NaN	NaN	-0.0780177	NaN	NaN	-0.135439	2	2	2	12.2	12.2	12.2	28.433	0	12.193	7371300	2	P25788	P25788
RPL13	60S ribosomal protein L13	0.342546	0.850388	0.608816	-0.237863	0.164891	0.160414	8	8	8	39.8	39.8	39.8	24.261	0	292.75	839480000	65	P26373	P26373
PTBP1	Polypyrimidine tract-binding protein 1	-0.247814	0.524043	-0.117362	0.574504	-0.381716	-0.198684	6	6	6	14.9	14.9	14.9	57.221	0	128.75	300690000	20	P26599;O95758	P26599
EEF1G	Elongation factor 1-gamma	NaN	-1.27139	-0.111491	NaN	0.573778	-0.268551	5	5	5	16.2	16.2	16.2	50.118	0	44.04	50987000	10	P26641	P26641
RPA1	Replication protein A 70 kDa DNA-binding subunit;Replication protein A 70 kDa DNA-binding subunit, N-terminally processed	NaN	0.776851	0.385564	NaN	-0.35749	-0.0527365	1	1	1	3.1	3.1	3.1	68.137	0.0027701	7.0561	6280200	2	P27694	P27694
APEX1	DNA-(apurinic or apyrimidinic site) lyase;DNA-(apurinic or apyrimidinic site) lyase, mitochondrial	NaN	NaN	-0.990846	NaN	NaN	0.139082	2	2	2	11.9	11.9	11.9	35.554	0	13.861	10089000	5	P27695	P27695
CALR	Calreticulin	0.477697	-0.587926	0.0216137	-1.52397	0.224968	-0.00331695	8	8	8	23.5	23.5	23.5	48.141	0	63.497	219190000	28	P27797	P27797
CANX	Calnexin	-0.313369	-0.119868	-0.0393044	0.100227	-0.355371	-0.345066	4	4	4	10.3	10.3	10.3	67.567	0	45.364	78332000	10	P27824	P27824
PSMA5	Proteasome subunit alpha type-5	0.239597	NaN	-0.457839	-0.48879	NaN	0.237318	1	1	1	7.9	7.9	7.9	26.411	0	16.778	25358000	5	P28066	P28066
PSMB5	Proteasome subunit beta type-5	NaN	-0.741906	0.380113	NaN	-0.812064	0.301073	4	4	4	24	24	24	28.48	0	28.371	17650000	7	P28074	P28074
TKT	Transketolase	0.13384	NaN	0.166069	0.334698	NaN	-0.122059	2	2	2	6.6	6.6	6.6	67.877	0	24.266	85814000	6	P29401	P29401
PRDX6	Peroxiredoxin-6	NaN	NaN	-0.108641	NaN	NaN	0.0161936	2	2	2	12.5	12.5	12.5	25.035	0	18.479	14226000	3	P30041	P30041
PRDX3	Thioredoxin-dependent peroxide reductase, mitochondrial	NaN	0.0439789	NaN	NaN	0.0451996	NaN	1	1	1	5.5	5.5	5.5	27.692	0	14.895	4838300	1	P30048	P30048
RPL12	60S ribosomal protein L12	0.0618658	-0.518041	0.177617	0.0404588	-0.127363	0.234415	5	5	5	49.1	49.1	49.1	17.818	0	74.432	217490000	24	P30050	P30050
PDIA3	Protein disulfide-isomerase A3	NaN	-0.733224	-0.38726	NaN	0.209404	0.205238	3	3	3	9.1	9.1	9.1	56.782	0	33.075	30203000	5	P30101	P30101
NMT1	Glycylpeptide N-tetradecanoyltransferase 1	-0.104849	NaN	NaN	-0.85203	NaN	NaN	1	1	1	3.8	3.8	3.8	56.806	0.0025707	6.8282	6578800	1	P30419	P30419
ATIC	Bifunctional purine biosynthesis protein PURH;Phosphoribosylaminoimidazolecarboxamide formyltransferase;IMP cyclohydrolase	NaN	0.557813	-0.790366	NaN	-0.0540486	-0.281709	1	1	1	3.5	3.5	3.5	64.615	0	7.9856	90912000	5	P31939	P31939
HNRNPH3	Heterogeneous nuclear ribonucleoprotein H3	NaN	0.495556	-1.20397	NaN	-0.878525	1.36774	3	2	2	10.1	7.8	7.8	36.926	0	23.343	16202000	9	P31942	P31942
HNRNPH1	Heterogeneous nuclear ribonucleoprotein H;Heterogeneous nuclear ribonucleoprotein H, N-terminally processed	-0.263589	0.175314	-0.469684	0.942079	-0.0428081	0.101149	10	10	7	29	29	21.2	49.229	0	158.38	137870000	23	P31943;P55795	P31943
SFN	14-3-3 protein sigma	NaN	NaN	0.0422711	NaN	NaN	0.158995	2	1	1	6.5	3.2	3.2	27.774	0.0063158	6.0066	2736400	1	P31947	P31947
STIP1	Stress-induced-phosphoprotein 1	0.078335	0.225672	0.184449	-0.838609	0.146783	-0.00200678	3	3	3	10.1	10.1	10.1	62.639	0	22.03	15906000	4	P31948	P31948
PRDX2	Peroxiredoxin-2	NaN	-0.590636	-1.25096	NaN	-0.20903	-0.173274	4	4	3	21.2	21.2	15.7	21.892	0	36.051	17059000	3	P32119	P32119
RPL9	60S ribosomal protein L9	-0.00872008	1.24874	-0.403679	0.880237	-0.510263	-0.273974	1	1	1	9.9	9.9	9.9	21.863	0.002611	6.8667	16407000	3	P32969	P32969
KIF5B	Kinesin-1 heavy chain	NaN	-0.18616	NaN	NaN	0	NaN	1	1	1	1.2	1.2	1.2	109.68	0.002457	6.6317	6825400	1	P33176	P33176
MCM5	DNA replication licensing factor MCM5	NaN	0.191658	-0.439485	NaN	0.0786304	0.352001	1	1	1	2.2	2.2	2.2	82.285	0.002584	6.8422	10747000	2	P33992	P33992
MCM7	DNA replication licensing factor MCM7	NaN	NaN	0.45584	NaN	NaN	-0.143854	1	1	1	2.2	2.2	2.2	81.307	0.0065934	6.1427	105990000	2	P33993	P33993
SHMT1	Serine hydroxymethyltransferase, cytosolic	NaN	1.61111	NaN	NaN	-1.05347	NaN	1	1	1	3.7	3.7	3.7	53.082	0.010373	5.9779	3849000	1	P34896	P34896
HSPA4	Heat shock 70 kDa protein 4	-0.00709279	-0.747943	0.0995771	-0.434111	0.0826117	0.0177216	9	9	8	16.9	16.9	15.2	94.33	0	67.898	236620000	31	P34932	P34932
PHB	Prohibitin	0.0140811	-0.386901	-0.459816	-0.597151	0.208765	-0.16368	3	3	3	18.8	18.8	18.8	29.804	0	38.929	204140000	10	P35232	P35232
RPL22	60S ribosomal protein L22	NaN	-0.954463	-0.119089	NaN	0.239144	0.199018	2	2	2	21.9	21.9	21.9	14.787	0	27.868	38875000	6	P35268	P35268
MYH9	Myosin-9	0.0193044	-0.437292	0.212643	-0.0825946	-0.0363297	-0.0541732	20	20	18	16.5	16.5	15.5	226.53	0	234.7	696630000	54	P35579;P35749;Q7Z406	P35579
COPB2	Coatomer subunit beta	-2.29829	1.4899	NaN	0.435268	-0.561015	NaN	1	1	1	2.1	2.1	2.1	102.49	0.0045249	6.2287	8880200	2	P35606	P35606
RPL4	60S ribosomal protein L4	0.0229839	0.533388	0.0945344	0.485455	0.0492493	-0.0314896	11	11	11	32.8	32.8	32.8	47.697	0	169.55	417840000	39	P36578	P36578
TAGLN2	Transgelin-2	0.0807374	-0.334418	-0.456944	-0.260526	-0.340443	-0.116076	4	4	4	27.6	27.6	27.6	22.391	0	27.235	59273000	10	P37802	P37802
ETFB	Electron transfer flavoprotein subunit beta	NaN	0.713504	NaN	NaN	-1.20017	NaN	1	1	1	6.7	6.7	6.7	27.843	0.0025974	6.8528	1575500	1	P38117	P38117
HSPA9	Stress-70 protein, mitochondrial	-0.1869	NaN	-0.742912	0.455418	NaN	-0.133772	3	3	3	6.3	6.3	6.3	73.68	0	19.331	24221000	6	P38646	P38646
RPL3	60S ribosomal protein L3	-0.31306	0.189965	0.134655	0.82071	0.0795231	0.109905	5	5	5	11.7	11.7	11.7	46.108	0	41.696	70382000	12	P39023	P39023
CCT6A	T-complex protein 1 subunit zeta	0.294421	0.439911	0.333252	-0.16102	-0.328464	-0.130551	4	4	4	14.1	14.1	14.1	58.024	0	42.098	53752000	15	P40227;Q92526	P40227
RPL13A	60S ribosomal protein L13a	-0.0595193	0.444276	0.114645	-0.121549	-0.148978	-0.214176	3	3	3	14.3	14.3	14.3	23.577	0	65.817	236780000	16	P40429;Q6NVV1	P40429
MDH1	Malate dehydrogenase, cytoplasmic	0.0330003	-0.41464	-0.0398177	-0.0175395	-0.0189452	0.190033	3	3	3	13.5	13.5	13.5	36.426	0	19.27	61566000	9	P40925	P40925
MDH2	Malate dehydrogenase, mitochondrial	0.0415367	0.250862	-0.216277	-0.297705	-0.131201	0.0620305	5	5	5	23.4	23.4	23.4	35.503	0	43.563	28422000	11	P40926	P40926
HADHA	Trifunctional enzyme subunit alpha, mitochondrial;Long-chain enoyl-CoA hydratase;Long chain 3-hydroxyacyl-CoA dehydrogenase	NaN	NaN	0.573177	NaN	NaN	-0.209777	2	2	2	4.2	4.2	4.2	82.999	0	11.95	13444000	2	P40939	P40939
EIF2S3	Eukaryotic translation initiation factor 2 subunit 3	NaN	0.283821	-0.152641	NaN	-0.0692754	0.0196307	2	2	2	6.8	6.8	6.8	51.109	0	12.259	12636000	3	P41091	P41091
IARS	Isoleucine--tRNA ligase, cytoplasmic	NaN	NaN	-1.18149	NaN	NaN	0.311526	2	2	2	2.4	2.4	2.4	144.5	0	14.067	41259000	5	P41252	P41252
CDKN2A	Cyclin-dependent kinase inhibitor 2A	NaN	-1.73632	NaN	NaN	0.558277	NaN	1	1	1	10.9	10.9	10.9	16.532	0.0063291	6.0088	3654700	1	P42771	P42771
MATR3	Matrin-3	-0.386243	0.526171	0.215665	0.457294	-0.42388	-0.193669	3	3	3	6.6	6.6	6.6	94.622	0	21.29	27688000	9	P43243	P43243
RANBP1	Ran-specific GTPase-activating protein	NaN	0.408999	NaN	NaN	-0.388274	NaN	1	1	1	5.5	5.5	5.5	23.31	0.0026455	6.9041	6124000	2	P43487	P43487
PSMC4	26S protease regulatory subunit 6B	NaN	NaN	-1.13354	NaN	NaN	-0.403478	2	2	1	5	5	2.6	47.366	0	9.5917	1229700	1	P43686	P43686
VDAC2	Voltage-dependent anion-selective channel protein 2	-0.807445	-0.175946	-0.132312	-0.208949	-0.301243	0.0432344	3	3	3	17.3	17.3	17.3	31.566	0	62.892	29874000	11	P45880	P45880
USP5	Ubiquitin carboxyl-terminal hydrolase 5	NaN	NaN	0.215136	NaN	NaN	-0.269351	1	1	1	1.7	1.7	1.7	95.785	0.010163	5.91	1691800	1	P45974	P45974
RPL28	60S ribosomal protein L28	-0.509151	1.06132	0.28178	0.999387	-0.176506	0.0717275	3	3	3	18.2	18.2	18.2	15.747	0	21.137	39021000	14	P46779	P46779
RPS9	40S ribosomal protein S9	-0.0227989	0.43143	0.119168	-0.394646	-0.100318	-0.155866	4	4	4	19.1	19.1	19.1	22.591	0	27.827	278470000	25	P46781	P46781
RPS5	40S ribosomal protein S5;40S ribosomal protein S5, N-terminally processed	-0.202454	0.914657	0.129084	0.511227	-0.286755	-0.0311218	4	4	3	26	26	25.5	22.876	0	59.851	77685000	15	P46782	P46782
IQGAP1	Ras GTPase-activating-like protein IQGAP1	-0.397592	-0.229961	0.545067	0.871772	-0.111015	0.494492	4	4	3	4.2	4.2	2.8	189.25	0	23.268	15501000	4	P46940	P46940
RPL29	60S ribosomal protein L29	NaN	-0.452695	NaN	NaN	0.503288	NaN	2	2	2	11.3	11.3	11.3	17.752	0	11.839	4696000	2	P47914	P47914
PREP	Prolyl endopeptidase	-1.61826	-0.687793	-0.913231	1.7583	0.454944	0.904974	7	7	7	16.9	16.9	16.9	80.699	0	70.246	308780000	19	P48147	P48147
CCT5	T-complex protein 1 subunit epsilon	NaN	0.47608	0.388794	NaN	0.184204	-0.015846	2	2	2	9.1	9.1	9.1	59.67	0	22.444	17824000	4	P48643	P48643
RPL34	60S ribosomal protein L34	0.0971812	1.12463	0.667362	1.10743	0.174733	0.47976	2	2	2	12.8	12.8	12.8	13.293	0	47.376	108710000	32	P49207	P49207
NASP	Nuclear autoantigenic sperm protein	NaN	-0.284073	0.0973269	NaN	0.0794764	-0.0972787	4	4	4	10.4	10.4	10.4	85.237	0	34.322	48547000	9	P49321	P49321
FASN	Fatty acid synthase;[Acyl-carrier-protein] S-acetyltransferase;[Acyl-carrier-protein] S-malonyltransferase;3-oxoacyl-[acyl-carrier-protein] synthase;3-oxoacyl-[acyl-carrier-protein] reductase;3-hydroxyacyl-[acyl-carrier-protein] dehydratase;Enoyl-[acyl-carrier-protein] reductase;Oleoyl-[acyl-carrier-protein] hydrolase	0.0805046	-0.283122	-0.112137	-0.188773	0.058001	-0.159393	16	16	16	10.5	10.5	10.5	273.42	0	123.3	270630000	46	P49327	P49327
CCT3	T-complex protein 1 subunit gamma	0.171357	-0.748693	-0.466931	-0.761589	0.0266843	-0.0897073	9	9	9	21.3	21.3	21.3	60.533	0	99.965	340310000	27	P49368	P49368
TUFM	Elongation factor Tu, mitochondrial	-0.394941	-0.363203	-0.307433	0.0151353	-0.204458	0.200546	7	7	7	23.7	23.7	23.7	49.541	0	64.697	99833000	19	P49411	P49411
ALDH7A1	Alpha-aminoadipic semialdehyde dehydrogenase	NaN	0.724306	NaN	NaN	0.143238	NaN	1	1	1	3.2	3.2	3.2	58.486	0.002681	6.9348	2033800	1	P49419	P49419
AARS	Alanine--tRNA ligase, cytoplasmic	NaN	NaN	-0.116891	NaN	NaN	0.205886	2	2	2	3.3	3.3	3.3	106.81	0	13.948	11757000	4	P49588	P49588
RBM25	RNA-binding protein 25	NaN	NaN	-0.0335409	NaN	NaN	0.186851	1	1	1	1.8	1.8	1.8	100.18	0.0023364	6.356	7115700	2	P49756	P49756
GDI2	Rab GDP dissociation inhibitor beta	NaN	NaN	0.116941	NaN	NaN	-0.47154	3	3	2	10.1	10.1	5.8	50.663	0	17.939	12478000	3	P50395	P50395
EMD	Emerin	NaN	-0.123575	-0.561939	NaN	0.0968138	0.0544855	2	2	1	13.4	13.4	6.7	28.994	0	11.132	8926300	5	P50402	P50402
SERPINH1	Serpin H1	-0.0579904	NaN	-0.381223	-0.980243	NaN	0.11743	1	1	1	2.6	2.6	2.6	46.44	0	7.3344	7799800	3	P50454	P50454
DNM2	Dynamin-2	NaN	-1.34908	0.00301743	NaN	-0.541643	0.598436	3	3	3	5.5	5.5	5.5	98.063	0	28.093	16631000	4	P50570	P50570
RPL14	60S ribosomal protein L14	0.439727	-0.271045	0.000554562	0.540873	0.479742	0.249873	1	1	1	5.6	5.6	5.6	23.432	0.0025253	6.7392	19964000	3	P50914	P50914
CCT8	T-complex protein 1 subunit theta	0.123509	-0.614035	-0.21547	-1.48567	0.184786	0.34192	6	6	6	13.1	13.1	13.1	59.62	0	45.475	310730000	14	P50990	P50990
CCT4	T-complex protein 1 subunit delta	-0.0851439	-1.4718	-0.108004	-0.564964	0.0705752	-0.47323	4	4	4	16.7	16.7	16.7	57.924	0	79.942	170640000	15	P50991	P50991
RAB9A	Ras-related protein Rab-9A	NaN	NaN	0.0770888	NaN	NaN	0.0869024	1	1	1	10.4	10.4	10.4	22.837	0.0024814	6.699	4344900	1	P51151	P51151
BCAP31	B-cell receptor-associated protein 31	0.34064	NaN	NaN	-1.68497	NaN	NaN	1	1	1	6.1	6.1	6.1	27.991	0.0026247	6.8918	34625000	2	P51572	P51572
PGD	6-phosphogluconate dehydrogenase, decarboxylating	-0.182606	-1.12197	0.157425	0.19767	0.257064	-0.231846	4	4	4	14.9	14.9	14.9	53.139	0	29.56	57773000	12	P52209	P52209
HNRNPM	Heterogeneous nuclear ribonucleoprotein M	1.12337	0.40958	-0.147662	-5.23275	-0.584515	-0.153277	3	3	3	5.8	5.8	5.8	77.515	0	35.755	37696000	12	P52272	P52272
KPNA2	Importin subunit alpha-1	NaN	-0.116136	0.0138768	NaN	0.187391	-0.171815	1	1	1	3.4	3.4	3.4	57.861	0	23.543	18901000	6	P52292	P52292
POLR2H	DNA-directed RNA polymerases I, II, and III subunit RPABC3	NaN	NaN	0.0884798	NaN	NaN	0.255393	1	1	1	10.7	10.7	10.7	17.143	0.0024876	6.7001	8720300	3	P52434	P52434
ARHGDIA	Rho GDP-dissociation inhibitor 1	-0.0885487	0.229208	-0.124688	-0.577762	-0.397372	-0.223419	4	4	4	31.4	31.4	31.4	23.207	0	154.81	398340000	24	P52565	P52565
HNRNPF	Heterogeneous nuclear ribonucleoprotein F;Heterogeneous nuclear ribonucleoprotein F, N-terminally processed	-0.215375	0.902864	0.195879	0.576233	-0.193483	-0.0768484	6	4	4	20.7	14.2	14.2	45.671	0	33.277	62396000	13	P52597	P52597
CAPZA1	F-actin-capping protein subunit alpha-1	NaN	0.0790268	0.158711	NaN	-0.291397	-0.161518	4	4	3	22	22	17.1	32.922	0	24.073	36931000	7	P52907	P52907
ACLY	ATP-citrate synthase	0.0926029	-0.55619	-0.193859	-0.944651	0.0634786	-0.144191	3	3	3	4	4	4	120.84	0	23.442	85606000	12	P53396	P53396
ALDH18A1	Delta-1-pyrroline-5-carboxylate synthase;Glutamate 5-kinase;Gamma-glutamyl phosphate reductase	NaN	NaN	0.96542	NaN	NaN	-0.889064	2	2	2	3.6	3.6	3.6	87.301	0	11.718	3595300	2	P54886	P54886
CSE1L	Exportin-2	-0.659773	-1.52656	-0.0999757	0.717554	0.705728	0.158959	2	2	2	3.5	3.5	3.5	110.42	0	14.106	59637000	4	P55060	P55060
VCP	Transitional endoplasmic reticulum ATPase	-0.230728	0.0234718	-0.0138065	0.46386	0.213102	0.0650197	6	6	6	12.8	12.8	12.8	89.321	0	42.554	184150000	18	P55072	P55072
NPEPPS	Puromycin-sensitive aminopeptidase	-0.406988	0.216382	0.0848675	1.13315	-0.368857	0.203943	3	3	3	4.1	4.1	4.1	103.28	0	23.146	19013000	7	P55786;A6NEC2	P55786
SUMO2;SUMO3;SUMO4	Small ubiquitin-related modifier 2;Small ubiquitin-related modifier 3;Small ubiquitin-related modifier 4	-0.504777	-0.0803642	0.0774031	0.65912	-0.0743696	0.242155	1	1	1	12.6	12.6	12.6	10.871	0	9.937	7321800	6	P61956;P55854;Q6EEV6	P61956;P55854;Q6EEV6
TPI1	Triosephosphate isomerase	0.183269	0.135301	-0.197247	-0.206515	0.338324	-0.242359	12	12	12	63.1	63.1	63.1	26.669	0	152.87	238220000	51	P60174	P60174
EIF3E	Eukaryotic translation initiation factor 3 subunit E	0.267076	NaN	-0.930406	0.4935	NaN	0.999973	1	1	1	2.7	2.7	2.7	52.22	0.006424	6.05	5604200	2	P60228	P60228
MYL6	Myosin light polypeptide 6	-1.15251	-2.53805	-0.803113	1.20729	0.0217856	-0.171869	2	2	2	17.9	17.9	17.9	16.93	0	27.467	44861000	8	P60660	P60660
ACTB	Actin, cytoplasmic 1;Actin, cytoplasmic 1, N-terminally processed	0.0898906	0.295628	-0.206852	0.244218	-0.0511913	0.0428078	13	13	1	48.5	48.5	4.5	41.736	0	323.31	368270000	6	P60709;Q6S8J3;A5A3E0;P0CG38;P0CG39;Q9BYX7;Q562R1	P60709
EIF4A1;EIF4A2	Eukaryotic initiation factor 4A-I;Eukaryotic initiation factor 4A-II;Eukaryotic initiation factor 4A-II, N-terminally processed	-0.111838	-1.7884	-0.435772	0.452869	0.444263	0.0284707	5	5	4	18.2	18.2	14.3	46.153	0	35.249	66706000	18	P60842;Q14240	P60842;Q14240
RPS20	40S ribosomal protein S20	-0.434146	-0.933365	-0.149722	0.373162	-0.218678	-0.113207	2	2	2	22.7	22.7	22.7	13.373	0	15.158	42404000	10	P60866	P60866
ACTR2	Actin-related protein 2	NaN	-0.825082	-0.674607	NaN	-0.0408122	0.181521	2	2	2	8.1	8.1	8.1	44.76	0	13.368	12593000	4	P61160	P61160
ARF3;ARF1;ARF4;ARF5	ADP-ribosylation factor 3;ADP-ribosylation factor 1;ADP-ribosylation factor 4;ADP-ribosylation factor 5	NaN	-1.19528	-0.89939	NaN	0.897106	-0.210763	2	2	2	19.3	19.3	19.3	20.601	0	14.543	21968000	3	P61204;P84077;P18085;P84085	P61204;P84077;P18085;P84085
RPS3A	40S ribosomal protein S3a	0.239693	NaN	1.26706	-0.199502	NaN	-1.35412	2	2	2	10.2	10.2	10.2	29.945	0	14.493	35375000	5	P61247	P61247
RPL15	60S ribosomal protein L15	-0.133971	0.868814	0.880879	0.151985	-0.156366	0.0520151	6	6	6	34.8	34.8	34.8	24.146	0	50.753	482510000	24	P61313	P61313
HNRNPK	Heterogeneous nuclear ribonucleoprotein K	-0.733187	0.79519	0.234874	1.41777	-0.363401	-0.047957	6	6	6	22	22	22	50.976	0	44.689	142900000	16	P61978	P61978
YWHAG	14-3-3 protein gamma;14-3-3 protein gamma, N-terminally processed	NaN	NaN	0.356196	NaN	NaN	0.00328754	2	1	1	8.9	5.7	5.7	28.302	0.0063966	6.0295	3681600	1	P61981	P61981
PPP1CB;PPP1CA;PPP1CC	Serine/threonine-protein phosphatase PP1-beta catalytic subunit;Serine/threonine-protein phosphatase PP1-alpha catalytic subunit;Serine/threonine-protein phosphatase PP1-gamma catalytic subunit	0.786591	0.0402081	0.105506	-0.322345	0.061577	-0.0888623	2	2	1	9.5	9.5	5.5	37.186	0	10.704	43847000	6	P62140;P62136;P36873	P62140;P62136;P36873
RPS8	40S ribosomal protein S8	0.318502	1.13957	0.278273	-0.364123	-0.321681	-0.145685	7	7	7	38.9	38.9	38.9	24.205	0	62.272	422180000	22	P62241	P62241
YWHAE	14-3-3 protein epsilon	-0.362717	-0.497322	-0.193507	-0.451469	-0.13038	-0.0620242	9	9	7	43.9	43.9	36.1	29.174	0	137.05	527200000	54	P62258	P62258
RPS14	40S ribosomal protein S14	0.272561	-0.132091	0.222416	-1.13676	0.0163492	0.140398	3	3	3	24.5	24.5	24.5	16.273	0	38.278	85309000	16	P62263	P62263
RPS23	40S ribosomal protein S23	-0.176664	NaN	0.0956445	0.140927	NaN	0.287494	1	1	1	7.7	7.7	7.7	15.807	0.0023529	6.3911	7822900	3	P62266	P62266
RPS11	40S ribosomal protein S11	NaN	0.259353	-0.0948882	NaN	-0.0410155	-0.0643609	2	2	2	12	12	12	18.431	0	29.666	18847000	4	P62280	P62280
RPL7A	60S ribosomal protein L7a	0.178508	-0.34029	0.219968	-0.208688	-1.50541	-0.0513005	3	3	3	14.3	14.3	14.3	29.995	0	34.726	79239000	8	P62424	P62424
RPS4X	40S ribosomal protein S4, X isoform	NaN	NaN	0.0518583	NaN	NaN	-0.155063	2	2	2	9.9	9.9	9.9	29.597	0	11.898	10155000	2	P62701	P62701
ACTA1;ACTA2;ACTG2;ACTC1	Actin, alpha skeletal muscle;Actin, aortic smooth muscle;Actin, gamma-enteric smooth muscle;Actin, alpha cardiac muscle 1	0.264201	-2.89869	0.36709	-1.11417	0.433137	0.132578	5	1	1	17	4.2	4.2	42.051	0	7.8964	248690000	4	P68133;P62736;P63267;P68032	P68133;P62736;P63267;P68032
RPS6	40S ribosomal protein S6	0.653182	0.7286	0.225725	-0.601754	0.264393	-0.0424942	6	6	6	25.7	25.7	25.7	28.68	0	52.794	86984000	15	P62753	P62753
HIST1H4A	Histone H4	0.338363	0.355354	0.0806835	0.631096	0.652157	0.32409	10	10	10	55.3	55.3	55.3	11.367	0	323.31	6335000000	148	P62805	P62805
RAB1A;RAB1B;RAB1C	Ras-related protein Rab-1A;Ras-related protein Rab-1B;Putative Ras-related protein Rab-1C	NaN	NaN	0.417506	NaN	NaN	-0.0397008	1	1	1	7.8	7.8	7.8	22.677	0.0027778	7.0791	5168200	3	P62820;Q9H0U4;Q92928	P62820;Q9H0U4;Q92928
RAN	GTP-binding nuclear protein Ran	-0.085045	0.108293	0.114789	-0.629989	0.115057	0.352751	4	4	4	20.8	20.8	20.8	24.423	0	24.574	42239000	12	P62826	P62826
RPL23	60S ribosomal protein L23	0.162464	-0.0765698	0.795759	0.571386	0.0608588	-0.124292	1	1	1	14.3	14.3	14.3	14.865	0	7.1976	88519000	5	P62829	P62829
RPS25	40S ribosomal protein S25	0.239189	NaN	-0.176302	-0.349405	NaN	0.0345202	1	1	1	7.2	7.2	7.2	13.742	0.0063559	6.0225	14562000	4	P62851	P62851
RPS26	40S ribosomal protein S26	NaN	NaN	0.324916	NaN	NaN	0.0748155	1	1	1	13	13	13	13.015	0.0025641	6.8253	15013000	1	P62854	P62854
RPS28	40S ribosomal protein S28	0.29385	-0.310745	0.351564	-2.43441	-0.0449568	-0.0089864	1	1	1	17.4	17.4	17.4	7.8409	0	15.879	86462000	5	P62857	P62857
RPL30	60S ribosomal protein L30	-0.638158	0.305016	NaN	1.03452	-0.273012	NaN	1	1	1	13.9	13.9	13.9	12.784	0.0027933	7.1121	6765000	2	P62888	P62888
RPL31	60S ribosomal protein L31	-0.0772099	0.24134	0.372749	0.16004	0.0331143	0.157922	5	5	5	33.6	33.6	33.6	14.463	0	42.605	116720000	29	P62899	P62899
RPL10A	60S ribosomal protein L10a	-0.0162438	-0.215867	0.164413	-1.12437	0.275394	0.0763683	4	4	4	17.5	17.5	17.5	24.831	0	27.724	83380000	11	P62906	P62906
RPL32	60S ribosomal protein L32	0.0666697	-1.93396	-0.0103842	-4.07713	0.387917	-0.110513	6	6	6	34.8	34.8	34.8	15.86	0	44.427	917620000	58	P62910	P62910
RPL8	60S ribosomal protein L8	0.0425823	0.553847	0.135778	-0.808013	0.0578933	-0.0988497	2	2	2	6.6	6.6	6.6	28.024	0	33.693	30474000	9	P62917	P62917
PPIA	Peptidyl-prolyl cis-trans isomerase A;Peptidyl-prolyl cis-trans isomerase A, N-terminally processed	0.303829	-1.026	-0.250963	-1.15206	0.432049	-0.160785	4	4	4	26.7	26.7	26.7	18.012	0	186.33	170970000	17	P62937	P62937
RPS27A;UBC;UBB;UBA52	Ubiquitin-40S ribosomal protein S27a;Ubiquitin;40S ribosomal protein S27a;Polyubiquitin-C;Ubiquitin;Polyubiquitin-B;Ubiquitin;Ubiquitin-60S ribosomal protein L40;Ubiquitin;60S ribosomal protein L40	-0.213675	0.27802	0.121686	0.464392	-0.112681	0.149356	3	3	3	28.2	28.2	28.2	17.965	0	85.474	804090000	25	P62979;P0CG48;P0CG47;P62987;A0A2R8Y422	P62979;P0CG48;P0CG47;P62987;A0A2R8Y422
YWHAZ	14-3-3 protein zeta/delta	0.0798444	0.254468	1.1166	-0.281878	-0.0461426	-0.368529	5	4	4	30.2	26.9	26.9	27.745	0	28.11	68397000	8	P63104	P63104
EIF5A;EIF5AL1	Eukaryotic translation initiation factor 5A-1;Eukaryotic translation initiation factor 5A-1-like	0.171395	0.561036	0.382402	-2.58694	-0.128466	-0.201269	6	6	5	55.2	55.2	55.2	16.832	0	52.083	245270000	10	P63241;Q6IS14;Q9GZV4	P63241;Q6IS14
GNB2L1	Guanine nucleotide-binding protein subunit beta-2-like 1;Guanine nucleotide-binding protein subunit beta-2-like 1, N-terminally processed	NaN	-1.02666	-0.114392	NaN	0.342351	-0.654824	3	3	3	19.2	19.2	19.2	35.076	0	72.732	38273000	9	P63244	P63244
ACTG1	Actin, cytoplasmic 2;Actin, cytoplasmic 2, N-terminally processed	-0.155284	0.177005	-0.438405	0.573716	-0.0994153	0.136657	13	1	1	48.5	4.5	4.5	41.792	0	44.747	1131900000	11	P63261	P63261
YBX1;YBX3;YBX2	Nuclease-sensitive element-binding protein 1;Y-box-binding protein 3;Y-box-binding protein 2	NaN	1.64227	0.40771	NaN	-0.0440699	0.639895	2	2	2	14.5	14.5	14.5	35.924	0	28.854	52653000	4	P67809;P16989;Q9Y2T7	P67809;P16989;Q9Y2T7
EEF1A1;EEF1A1P5;EEF1A2	Elongation factor 1-alpha 1;Putative elongation factor 1-alpha-like 3;Elongation factor 1-alpha 2	-0.219462	0.0231612	-0.242377	0.329334	-0.166831	-8.25673e-05	12	12	12	32.3	32.3	32.3	50.14	0	266.05	974410000	174	P68104;Q5VTE0;Q05639	P68104;Q5VTE0;Q05639
TUBA1B;TUBA4A	Tubulin alpha-1B chain;Tubulin alpha-4A chain	0.0254474	-0.308445	-0.0967124	-0.177613	-0.102463	-0.502254	14	14	1	45.9	45.9	2.9	50.151	0	323.31	26586000	9	P68363;P68366	P68363;P68366
TUBB4B;TUBB4A	Tubulin beta-4B chain;Tubulin beta-4A chain	-0.104631	-0.590786	-0.128642	-0.670045	-0.0976817	0.0153339	9	3	3	27	9.9	9.9	49.83	0	48.467	156970000	29	P68371;P04350;Q3ZCM7	P68371;P04350
HIST1H3A;H3F3A;HIST2H3A;HIST3H3;H3F3C;HIST2H3PS2	Histone H3.1;Histone H3.3;Histone H3.2;Histone H3.1t;Histone H3.3C;Histone H3	1.11634	-0.401444	-0.865098	-4.36407	0.31245	0.0153134	4	4	4	19.9	19.9	19.9	15.404	0	46.399	750170000	23	P68431;P84243;Q71DI3;Q16695;Q6NXT2;Q5TEC6	P68431;P84243;Q71DI3;Q16695;Q6NXT2;Q5TEC6
CCT2	T-complex protein 1 subunit beta	0.0581628	-0.193674	0.0504983	0.14522	-0.0832807	0.168679	9	9	9	21.9	21.9	21.9	57.488	0	70.676	277060000	40	P78371	P78371
DCD	Dermcidin;Survival-promoting peptide;DCD-1	0.50406	NaN	0.52796	-1.31566	NaN	-0.550901	1	1	1	12.7	12.7	12.7	11.284	0	7.4778	22081000	2	P81605	P81605
RPL24	60S ribosomal protein L24	0.707066	NaN	NaN	0.965235	NaN	NaN	1	1	1	8.3	8.3	8.3	17.779	0.00271	6.9762	3730600	1	P83731	P83731
ERH	Enhancer of rudimentary homolog	NaN	0.1173	NaN	NaN	0.0365882	NaN	1	1	1	16.3	16.3	16.3	12.259	0	7.2736	5439900	1	P84090	P84090
RPL19	60S ribosomal protein L19	0.144595	0.696099	0.681954	0.343299	0.401788	0.362252	3	3	3	12.8	12.8	12.8	23.466	0	216.8	1005900000	43	P84098	P84098
HDLBP	Vigilin	NaN	NaN	0.254954	NaN	NaN	0.286495	2	2	1	3.3	3.3	2.1	141.45	0	11.581	3992600	1	Q00341	Q00341
CLTC	Clathrin heavy chain 1	0.042781	-0.239691	0.117144	-0.262624	-0.221795	-0.197414	13	13	13	13	13	13	191.61	0	102.98	518410000	30	Q00610;P53675	Q00610
HNRNPU	Heterogeneous nuclear ribonucleoprotein U	0.039422	0.138508	-0.0335959	-0.512726	-0.123019	-0.19354	10	10	10	19.5	19.5	19.5	90.583	0	180.7	666580000	44	Q00839	Q00839
SPTBN1	Spectrin beta chain, non-erythrocytic 1	NaN	-1.05795	0.547949	NaN	-0.118017	0.0984806	2	2	2	1.6	1.6	1.6	274.61	0	23.119	25254000	3	Q01082	Q01082
CAP1	Adenylyl cyclase-associated protein 1	NaN	0.984751	0.559566	NaN	-0.254925	-0.0448997	1	1	1	3.8	3.8	3.8	51.901	0	16.642	36565000	6	Q01518	Q01518
PFKP	ATP-dependent 6-phosphofructokinase, platelet type	-0.879233	-0.362721	-0.439221	-0.514047	0.65279	0.716017	6	6	6	13.9	13.9	13.9	85.595	0	47.121	95140000	18	Q01813	Q01813
DSG1	Desmoglein-1	NaN	NaN	0.0142643	NaN	NaN	0.0559487	2	2	2	3.3	3.3	3.3	113.75	0	13.407	15051000	2	Q02413	Q02413
RPL18A	60S ribosomal protein L18a	0.139915	0.191326	0.0121374	-0.112242	0.0974231	0.0790484	4	4	4	21.6	21.6	21.6	20.762	0	58.028	104110000	23	Q02543	Q02543
FKBP4	Peptidyl-prolyl cis-trans isomerase FKBP4;Peptidyl-prolyl cis-trans isomerase FKBP4, N-terminally processed	-0.176874	NaN	0.222792	0.0912783	NaN	0.143698	4	4	4	15.5	15.5	15.5	51.804	0	43.005	69732000	10	Q02790	Q02790
RPL6	60S ribosomal protein L6	0.610706	-0.933411	-0.0256778	-0.767192	0.36121	-0.246599	4	4	4	16	16	16	32.728	0	25.834	63171000	16	Q02878	Q02878
SRSF11	Serine/arginine-rich splicing factor 11	-0.094069	0.0852022	0.182841	-0.262273	-0.458749	-0.0237141	1	1	1	3.5	3.5	3.5	53.542	0.0027174	6.9911	35639000	4	Q05519	Q05519
GFPT1;GFPT2	Glutamine--fructose-6-phosphate aminotransferase [isomerizing] 1;Glutamine--fructose-6-phosphate aminotransferase [isomerizing] 2	NaN	-0.26608	0.398552	NaN	0.185745	-0.284943	2	2	2	5	5	5	78.806	0	13.872	25266000	6	Q06210;O94808	Q06210;O94808
PRDX1	Peroxiredoxin-1	NaN	0.0802398	-0.195664	NaN	-0.0594632	-0.00513212	4	3	3	25.6	20.1	20.1	22.11	0	18.211	19143000	4	Q06830	Q06830
RPL18	60S ribosomal protein L18	-0.206826	0.682634	0.286096	0.233755	-0.183804	-0.155661	6	6	6	29.3	29.3	29.3	21.634	0	323.31	3850600000	113	Q07020	Q07020
C1QBP	Complement component 1 Q subcomponent-binding protein, mitochondrial	-0.660365	0.214188	0.381997	0.430746	-0.532456	0.00981544	4	4	4	26.6	26.6	26.6	31.362	0	28.434	113980000	14	Q07021	Q07021
CKAP4	Cytoskeleton-associated protein 4	0.226643	-1.06316	0.392883	-0.204731	-0.0346394	-0.301203	6	6	6	15.6	15.6	15.6	66.022	0	80.259	99609000	13	Q07065	Q07065
KHDRBS1	KH domain-containing, RNA-binding, signal transduction-associated protein 1	NaN	NaN	0.0179873	NaN	NaN	-0.357644	1	1	1	3.2	3.2	3.2	48.227	0.01004	5.8861	9237300	2	Q07666	Q07666
DHX9	ATP-dependent RNA helicase A	0.33083	-0.660415	0.452273	-1.20055	-0.0693134	-0.126792	6	6	6	7.9	7.9	7.9	140.96	0	143.8	563480000	35	Q08211	Q08211
DSC1	Desmocollin-1	NaN	0.182856	0.469198	NaN	0.420397	-0.468675	1	1	1	1.7	1.7	1.7	99.986	0.0045351	6.234	4434200	2	Q08554	Q08554
SSRP1	FACT complex subunit SSRP1	NaN	1.20233	0.214411	NaN	-0.506703	0.786309	1	1	1	2	2	2	81.074	0	50.2	10892000	2	Q08945	Q08945
NSUN2	tRNA (cytosine(34)-C(5))-methyltransferase	NaN	NaN	0.586307	NaN	NaN	0.0595467	3	3	3	7.7	7.7	7.7	86.47	0	26.762	50913000	5	Q08J23	Q08J23
ILF2	Interleukin enhancer-binding factor 2	NaN	NaN	-0.617115	NaN	NaN	-0.0181642	2	2	2	7.9	7.9	7.9	43.062	0	12.705	11340000	3	Q12905	Q12905
ILF3	Interleukin enhancer-binding factor 3	-0.00985217	1.24165	-0.20318	0.0329722	-0.610743	-0.0875285	6	6	6	7.5	7.5	7.5	95.337	0	37.077	110010000	12	Q12906;Q96SI9	Q12906
ACACA	Acetyl-CoA carboxylase 1;Biotin carboxylase	NaN	NaN	0.547678	NaN	NaN	-0.0531294	5	5	5	2.9	2.9	2.9	265.55	0	30.131	27022000	6	Q13085	Q13085
AIMP2	Aminoacyl tRNA synthase complex-interacting multifunctional protein 2	NaN	NaN	0.212018	NaN	NaN	-0.12899	1	1	1	7.8	7.8	7.8	35.348	0.0045767	6.2875	5033000	1	Q13155	Q13155
CBX3	Chromobox protein homolog 3	-0.0144226	-1.40979	-0.221579	-1.65683	0.323801	-0.235252	2	2	2	14.8	14.8	14.8	20.811	0	25.661	75443000	9	Q13185	Q13185
PSMD2	26S proteasome non-ATPase regulatory subunit 2	-0.358298	0.754501	NaN	0.0515637	0.40824	NaN	1	1	1	1.9	1.9	1.9	100.2	0	7.2644	11993000	2	Q13200	Q13200
TRIM28	Transcription intermediary factor 1-beta	0.291598	-0.948061	-0.111578	-1.06506	0.430484	0.137095	6	6	6	14	14	14	88.549	0	223.4	423010000	12	Q13263	Q13263
EIF3I	Eukaryotic translation initiation factor 3 subunit I	NaN	NaN	-0.470117	NaN	NaN	-0.0173078	2	2	2	13.8	13.8	13.8	36.501	0	20.32	8697200	2	Q13347	Q13347
DYNC1I2	Cytoplasmic dynein 1 intermediate chain 2	NaN	0.448318	NaN	NaN	-0.659288	NaN	1	1	1	3	3	3	71.456	0.01	5.8801	3759600	1	Q13409	Q13409
TUBB3	Tubulin beta-3 chain	-0.733989	0.399945	0.139177	-0.818087	-0.335579	0.0375898	4	1	1	12.9	3.8	3.8	50.432	0.0027548	7.0538	15841000	7	Q13509	Q13509
TRA2A	Transformer-2 protein homolog alpha	NaN	NaN	0.602221	NaN	NaN	0.016639	1	1	1	7.4	7.4	7.4	32.688	0	8.288	3485700	1	Q13595	Q13595
FHL1	Four and a half LIM domains protein 1	NaN	NaN	0.258412	NaN	NaN	-0.0558643	1	1	1	3.7	3.7	3.7	36.263	0.0027322	7.0063	2237000	1	Q13642	Q13642
SPTAN1	Spectrin alpha chain, non-erythrocytic 1	0.228158	NaN	-0.0535762	0.362096	NaN	-0.787525	2	2	2	1.1	1.1	1.1	284.54	0	11.621	4162900	2	Q13813	Q13813
DDX39B	Spliceosome RNA helicase DDX39B	0.02129	0.569307	0.00910473	-0.0518281	-0.0599071	-0.0135152	3	3	3	13.8	13.8	13.8	48.991	0	50.341	330870000	11	Q13838;O00148	Q13838
HNRNPD	Heterogeneous nuclear ribonucleoprotein D0	NaN	-2.3235	-0.710541	NaN	0.424766	-0.0389292	3	3	3	13.5	13.5	13.5	38.434	0	20.346	37644000	6	Q14103	Q14103
GANAB	Neutral alpha-glucosidase AB	0.320877	-0.618196	0.221511	-0.741365	0.353774	-0.100503	4	4	4	7.5	7.5	7.5	106.87	0	27.471	119110000	12	Q14697	Q14697
KPNB1	Importin subunit beta-1	0.166299	0.233403	0.00877967	0.205671	-0.267528	0.0589527	6	6	6	9.7	9.7	9.7	97.169	0	77.171	244720000	26	Q14974	Q14974
NUMA1	Nuclear mitotic apparatus protein 1	0.668436	0.160776	-0.270153	-1.86334	-0.519862	0.290745	5	5	5	3.7	3.7	3.7	238.26	0	32.389	70592000	7	Q14980	Q14980
EFTUD2	116 kDa U5 small nuclear ribonucleoprotein component	0.525793	1.20382	0.245845	-0.613094	-0.750215	-0.868493	5	5	5	8.6	8.6	8.6	109.43	0	33.829	34199000	8	Q15029	Q15029
RRS1	Ribosome biogenesis regulatory protein homolog	-0.0679625	NaN	NaN	1.82198	NaN	NaN	1	1	1	3.3	3.3	3.3	41.193	0	7.3479	7301400	1	Q15050	Q15050
EIF4H	Eukaryotic translation initiation factor 4H	NaN	NaN	-0.497167	NaN	NaN	-0.18884	2	2	2	13.3	13.3	13.3	27.385	0	11.566	14449000	3	Q15056	Q15056
NONO	Non-POU domain-containing octamer-binding protein	NaN	NaN	0.164738	NaN	NaN	-0.966567	1	1	1	4.7	4.7	4.7	54.231	0	8.8979	7756700	1	Q15233	Q15233
PCBP2;PCBP3	Poly(rC)-binding protein 2;Poly(rC)-binding protein 3	0.427131	NaN	-0.243219	-0.919232	NaN	-0.154811	3	3	3	13.7	13.7	13.7	38.58	0	46.232	80298000	12	Q15366;P57721;Q15365	Q15366;P57721
TCEB1	Transcription elongation factor B polypeptide 1	0.297614	1.03067	NaN	1.55586	0.115332	NaN	1	1	1	17.9	17.9	17.9	12.473	0	17.492	15013000	2	Q15369	Q15369
TOMM20	Mitochondrial import receptor subunit TOM20 homolog	0.240954	NaN	0.689039	1.76609	NaN	0.296025	1	1	1	9	9	9	16.298	0	9.2615	30854000	7	Q15388	Q15388
SF3B3	Splicing factor 3B subunit 3	-0.277259	NaN	-0.102565	-0.663253	NaN	-0.0175548	4	4	4	4.9	4.9	4.9	135.58	0	25.16	15270000	6	Q15393	Q15393
SAFB	Scaffold attachment factor B1	NaN	0.167798	NaN	NaN	0.306235	NaN	2	2	1	5.5	5.5	2.3	102.64	0	12.54	3104600	1	Q15424	Q15424
MAPRE1	Microtubule-associated protein RP/EB family member 1	0.240103	NaN	-0.767789	0.927916	NaN	-0.219812	6	6	6	27.2	27.2	27.2	29.999	0	43.036	58903000	9	Q15691	Q15691
SLC1A5	Neutral amino acid transporter B(0)	-0.63075	NaN	NaN	1.50354	NaN	NaN	1	1	1	3.7	3.7	3.7	56.598	0	7.3168	20203000	2	Q15758	Q15758
DDB1	DNA damage-binding protein 1	NaN	0.418713	0.278675	NaN	0.222907	-0.345715	2	2	2	2.6	2.6	2.6	126.97	0	13.03	20021000	2	Q16531	Q16531
CDC37	Hsp90 co-chaperone Cdc37;Hsp90 co-chaperone Cdc37, N-terminally processed	-0.369776	0.47468	NaN	0.610848	0.0819763	NaN	2	2	2	10.1	10.1	10.1	44.468	0	15.061	10684000	3	Q16543	Q16543
DPYSL2;DPYSL3;CRMP1	Dihydropyrimidinase-related protein 2;Dihydropyrimidinase-related protein 3;Dihydropyrimidinase-related protein 1	-0.404495	-0.545234	NaN	0.723142	0.039363	NaN	2	2	2	5.6	5.6	5.6	62.293	0	20.013	16383000	2	Q16555;Q14195;Q14194	Q16555;Q14195;Q14194
SRSF7	Serine/arginine-rich splicing factor 7	-0.22513	0.43326	-0.180729	1.26484	0.207327	0.178872	2	2	2	16	16	16	27.366	0	12.883	23043000	3	Q16629	Q16629
FSCN1	Fascin	0.0633181	-0.783915	-0.144856	-0.0258064	0.00824674	-0.115514	4	4	4	14.6	14.6	14.6	54.529	0	54.268	68285000	11	Q16658	Q16658
IMMT	MICOS complex subunit MIC60	0.652797	0.307895	0.265695	-1.49493	0.06967	0.408283	4	4	4	5.8	5.8	5.8	83.677	0	26.846	8158900000	8	Q16891	Q16891
KIAA0753	Uncharacterized protein KIAA0753	NaN	NaN	1.24769	NaN	NaN	0.316711	1	1	1	1.2	1.2	1.2	109.41	1	-2	84802000	1	Q2KHM9	Q2KHM9
TCHHL1	Trichohyalin-like protein 1	NaN	NaN	-0.458121	NaN	NaN	0.376316	1	1	1	1.4	1.4	1.4	99.274	0	8.0308	373350000	3	Q5QJ38	Q5QJ38
FRY	Protein furry homolog	NaN	NaN	-1.77845	NaN	NaN	-0.0282195	1	1	1	0.5	0.5	0.5	338.87	0.002551	6.7924	8923600	1	Q5TBA9	Q5TBA9
PRPF8	Pre-mRNA-processing-splicing factor 8	NaN	NaN	-0.27991	NaN	NaN	0.0543946	1	1	1	0.6	0.6	0.6	273.6	0.002439	6.5902	1924800	1	Q6P2Q9	Q6P2Q9
NCEH1	Neutral cholesterol ester hydrolase 1	NaN	NaN	-2.51769	NaN	NaN	1.6779	4	4	4	13.2	13.2	13.2	45.807	0	26.043	97914000	12	Q6PIU2	Q6PIU2
USP34	Ubiquitin carboxyl-terminal hydrolase 34	-0.178469	2.53874	2.13608	1.76762	-0.73918	0.597251	1	1	1	0.4	0.4	0.4	404.23	0	7.79	257990000	16	Q70CQ2	Q70CQ2
SND1	Staphylococcal nuclease domain-containing protein 1	0.663837	0.228558	-0.120682	0.0369031	0.0329105	0.406818	4	4	4	6.7	6.7	6.7	102	0	26.501	43016000	8	Q7KZF4	Q7KZF4
DDX46	Probable ATP-dependent RNA helicase DDX46	-0.0505384	NaN	0.1475	0.508547	NaN	0.170183	5	5	5	6	6	6	117.36	0	32.695	59410000	10	Q7L014	Q7L014
C16orf62	UPF0505 protein C16orf62	NaN	-0.326086	NaN	NaN	0.287179	NaN	1	1	1	1.7	1.7	1.7	109.56	0.010417	5.9898	56288000	1	Q7Z3J2	Q7Z3J2
MUC19	Mucin-19	0.917216	NaN	NaN	-2.12316	NaN	NaN	1	1	1	0.5	0.5	0.5	805.24	0.0023474	6.3652	33880000	1	Q7Z5P9	Q7Z5P9
[truncated: 51 more rows]

## Sheet: Fig. 5B data
Identified proteins (in at least 1 of 3 biological replicates) in volcano plots Fig. 5B (6Yn-Pro+NRH+NMNAT1 overexpression vs DMSO+NRH+NMNAT1 overexpression)
[truncated: 341 more rows]

[truncated: 6 more sheets: Fig. 5C data, Fig. 5D data, Sign. enr. Fig. 4E, Sign. enr. Fig. 4F, Sign. enr. Fig. 4G, Sign. enr. Fig. 4H]
